# Supplementary material for: Prediction of Phytochemicals for Their Potential to Inhibit New Delhi Metallo β-Lactamase (NDM-1)
Source: MDPI journal article supplement (doi:10.3390/ph16101404), 2023-10-03
Supplement: s1 [file s1]

### Rosmarinic acid

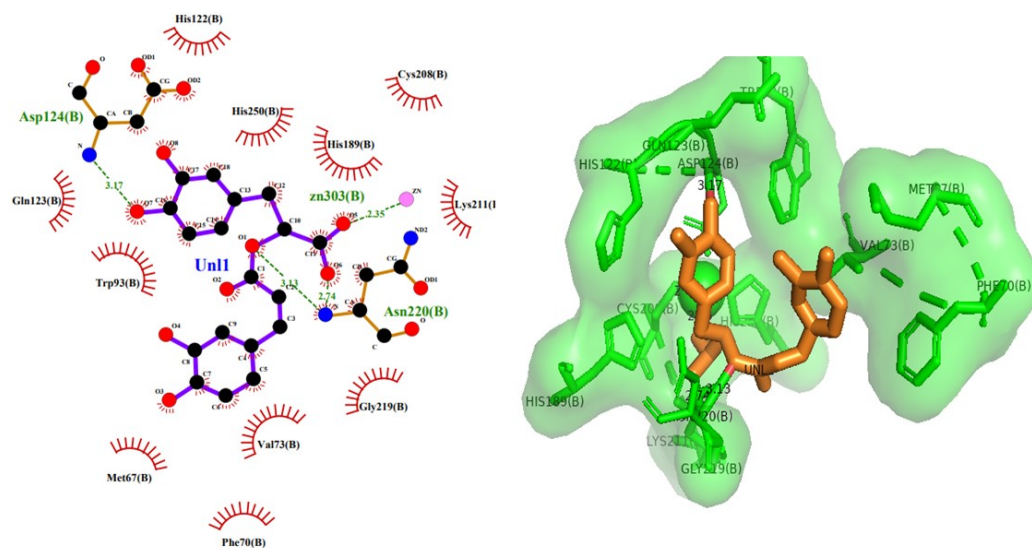

**Figure S1.** The 2D and 3D representations of binding of rosmarinic acid with the protein.

### Butein

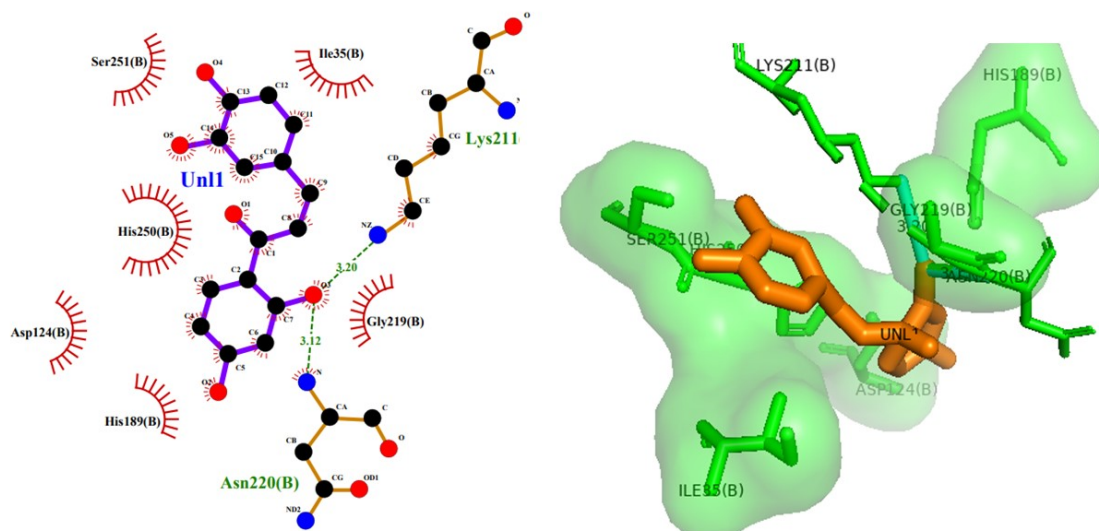

**Figure S2.** The 2D and 3D representations of binding of butein with the protein.

# Monodemethylcurcumin

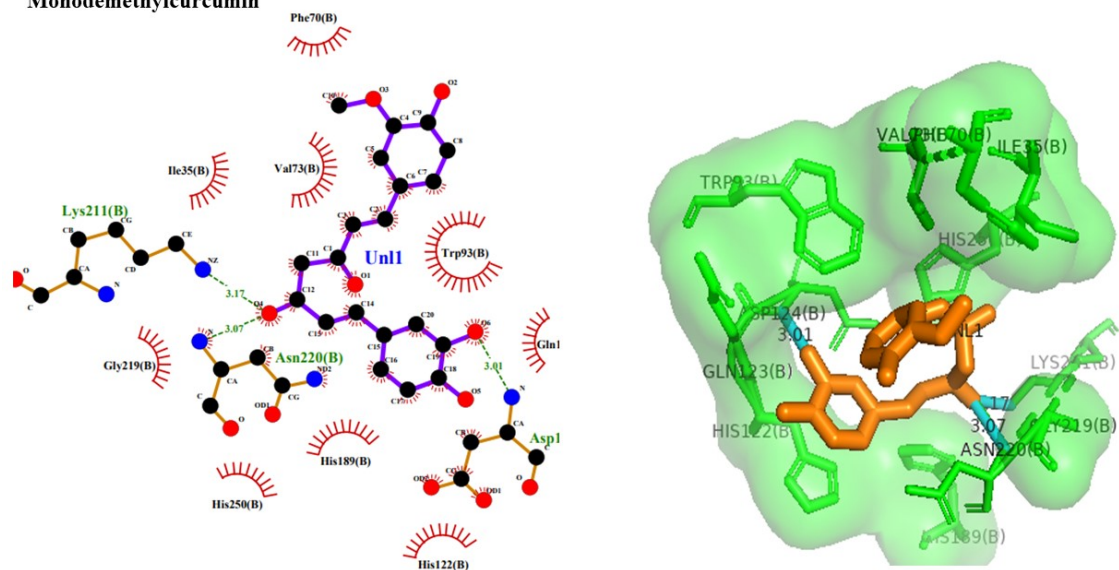

**Figure S3.** The 2D and 3D representations of binding of monodemethylcurcumin with the protein.
