# Supplementary material for: Prediction of Phytochemicals for Their Potential to Inhibit New Delhi Metallo β-Lactamase (NDM-1)
Source: MDPI journal article supplement (doi:10.3390/ph16101404), 2023-10-03
Supplement: s1 [file s1]

**Table S1. Structures of NDM-1, their native ligands and predicted RMSD values**

| Cross validation of native ligands from crystallographic structures of NDM-1 based on RMSD values |     |      |      |      |      |      |      |
|---------------------------------------------------------------------------------------------------|-----|------|------|------|------|------|------|
| Native ligands                                                                                    |     | 4RL2 | 6NY7 | 6O3R | 4EYB | 6TWT | 5ZGE |
|                                                                                                   | 3S3 | 3.19 | 3.2  | 2.50 | 1.20 | 2.68 | 3.29 |
|                                                                                                   | L8J | 1.50 | 2.87 | 1.76 | 1.13 | 1.50 | 1.61 |
|                                                                                                   | XJE | 2.10 | 0.68 | 1.55 | 1.10 | 1.20 | 0.70 |
|                                                                                                   | 0WO | 3.20 | 3.15 | 4.46 | 2.55 | 1.02 | 1.52 |
|                                                                                                   | EPE | 0.80 | 0.88 | 0.92 | 0.81 | 0.78 | 0.60 |
|                                                                                                   | Z27 | 1.11 | 1.21 | 1.47 | 1.34 | 1.97 | 0.30 |

Following criteria has been adopted as reported in study (Bajda et al., 2013).

RMSD  $\leq$  1.0 Å, good pose. (Green)

RMSD  $\leq$  2.0 Å, close pose. (Blue)

RMSD  $\leq$  3.0 Å, pose with errors. (Red)

RMSD  $>$  3.0 Å, bad pose. (Pink)

Bajda, M., Więckowska, A., Hebda, M., Guzior, N., Sottriffer, C. A., & Malawska, B. (2013). Structure-based search for new inhibitors of cholinesterases. International Journal of Molecular Sciences, 14(3), 5608-5632.
