# Supplementary material for: Prediction of Phytochemicals for Their Potential to Inhibit New Delhi Metallo β-Lactamase (NDM-1)
Source: Pharmaceuticals (Basel). 2023 Oct 3;16(10):1404. doi: 10.3390/ph16101404 (PMC10610165; doi:10.3390/ph16101404)
Supplement: Supplementary file 1 [file pharmaceuticals-16-01404-s001.zip]

Archive with 4 entries (4 files):
- Figures S1-S3.pdf
- Table S1.pdf
- Table S2.xlsx
- Table S3.xlsx
