# Supplementary material for: Prediction of Phytochemicals for Their Potential to Inhibit New Delhi Metallo β-Lactamase (NDM-1)
Source: Pharmaceuticals (Basel). 2023 Oct 3;16(10):1404. doi: 10.3390/ph16101404 (PMC10610165; doi:10.3390/ph16101404)
Supplement: Supplementary file 1 [file pharmaceuticals-16-01404-s001.zip › Table S2.xlsx]

## Sheet: Sheet1
Table S2. Pharmacokinetics and physiochemical analysis of phytochemicals
name	Toxicophores	Lipinski	MW	Carcinogenicity	Ames	LogP	LogS	BBB	cas_number
Cyanidin 3-(6''-acetyl-galactoside)	2	Rejected	491.12	0.111	0.816	1.591	-3.825	0.024	[H][C@]1(COC(C)=O)O[C@@]([H])(OC2=CC3=C(O)C=C(O)C=C3[O+]=C2C2=CC=C(O)C(O)=C2)[C@]([H])(O)[C@@]([H])(O)[C@@]1([H])O
Cyanidin 3-(6''-succinyl-glucoside)	2	Rejected	549.12	0.1	0.706	0.883	-3.716	0.027	[H][C@]1(COC(=O)CCC(O)=O)O[C@@]([H])(OC2=CC3=C(O)C=C(O)C=C3[O+]=C2C2=CC=C(O)C(O)=C2)[C@]([H])(O)[C@@]([H])(O)[C@]1([H])O
Pelargonidin 3-(6''-succinyl-glucoside)	1	Rejected	533.13	0.153	0.645	1.144	-3.757	0.029	[H][C@]1(COC(=O)CCC(O)=O)O[C@@]([H])(OC2=CC3=C(O)C=C(O)C=C3[O+]=C2C2=CC=C(O)C=C2)[C@]([H])(O)[C@@]([H])(O)[C@]1([H])O
Peonidin 3-(6''-acetyl-galactoside)	1	Rejected	505.13	0.141	0.735	1.833	-3.489	0.042	[H][C@]1(COC(C)=O)OC(OC2=C([O+]=C3C=C(O)C=C(O)C3=C2)C2=CC(OC)=C(O)C=C2)[C@]([H])(O)[C@@]([H])(O)[C@@]1([H])O
Malvidin 3-(6''-acetyl-galactoside)	1	Rejected	535.14	0.063	0.603	1.697	-3.028	0.055	[H][C@]1(COC(C)=O)OC(OC2=C([O+]=C3C=C(O)C=C(O)C3=C2)C2=CC(OC)=C(O)C(OC)=C2)[C@]([H])(O)[C@@]([H])(O)[C@@]1([H])O
Pelargonidin 3-arabinoside	1	Accepted	403.1	0.34	0.743	1.764	-3.184	0.022	[H][C@]1(CO)O[C@]([H])(OC2=CC3=C(O)C=C(O)C=C3[O+]=C2C2=CC=C(O)C=C2)[C@@]([H])(O)[C@]1([H])O
Peonidin 3-(6''-p-coumaroyl-glucoside)	2	Rejected	609.16	0.202	0.689	3.273	-3.927	0.013	[H][C@]1(COC(=O)\C=C\C2=CC=C(O)C=C2)OC(OC2=C([O+]=C3C=C(O)C=C(O)C3=C2)C2=CC(OC)=C(O)C=C2)[C@]([H])(O)[C@@]([H])(O)[C@]1([H])O
Delphinidin 3-xyloside	2	Rejected	435.09	0.038	0.768	1.093	-2.666	0.01	[H][C@]1(CO)O[C@@]([H])(OC2=C([O+]=C3C=C(O)C=C(O)C3=C2)C2=CC(O)=C(O)C(O)=C2)[C@]([H])(O)[C@@]1([H])O
Petunidin 3-(6''-p-coumaroyl-glucoside)	3	Rejected	625.16	0.113	0.685	3.016	-3.637	0.012	[H][C@]1(COC(=O)\C=C\C2=CC=C(O)C=C2)OC(OC2=C([O+]=C3C=C(O)C=C(O)C3=C2)C2=CC(O)=C(O)C(OC)=C2)[C@]([H])(O)[C@@]([H])(O)[C@]1([H])O
p-Coumaroyl vitisin A	2	Rejected	707.16	0.395	0.46	3.511	-3.462	0.011	COC1=CC(=CC(OC)=C1O)C1=[O+]C2=C3C(OC(=CC3=C1OC1O[C@H](COC(=O)\C=C\C3=CC=C(O)C=C3)[C@@H](O)[C@H](O)[C@H]1O)C(O)=O)=CC(O)=C2
Malvidin 3-(6''-caffeoyl-glucoside)	3	Rejected	655.17	0.075	0.689	2.918	-3.502	0.011	[H][C@]1(COC(=O)\C=C\C2=CC(O)=C(O)C=C2)OC(OC2=CC3=C(C=C(O)C=C3O)[O+]=C2C2=CC(OC)=C(O)C(OC)=C2)[C@]([H])(O)[C@@]([H])(O)[C@]1([H])O
Delphinidin 3-feruloylglucoside	3	Rejected	641.15	0.087	0.706	2.717	-3.869	0.007	[H][C@]1(COC(=O)\C=C\C2=CC(OC)=C(O)C=C2)O[C@@]([H])(OC2=C([O+]=C3C=C(O)C=C(O)C3=C2)C2=CC(O)=C(O)C(O)=C2)[C@]([H])(O)[C@@]([H])(O)[C@]1([H])O
Luteolinidin	2	Accepted	271.06	0.327	0.509	3.317	-3.407	0.009	OC1=CC2=[O+]C(=CC=C2C(O)=C1)C1=CC=C(O)C(O)=C1
Phloretin-2'-O-(2''-O-xylosylglucoside)	1	Rejected	568.18	0.101	0.247	-0.391	-2.435	0.196	OC[C@H]1O[C@@H](O[C@@H]2[C@@H](O)[C@H](O)[C@@H](CO)O[C@H]2OC2=C(C(=O)CCC3=CC=C(O)C=C3)C(O)=CC(O)=C2)[C@H](O)[C@H]1O
ent-Gallocatechin 3-gallate	2	Rejected	458.08	0.033	0.219	1.852	-3.89	0.006	OC1=CC2=C(C[C@@H](OC(=O)C3=CC(O)=C(O)C(O)=C3)[C@@H](O2)C2=CC(O)=C(O)C(O)=C2)C(O)=C1
Prodelphinidin trimer GC-GC-C	1	Rejected	509.18	0.14	0.033	-0.65	-1.327	0.203	[H]N[C@@H](CC(N)=O)C(=O)N[C@@H](C[SeH])C(=O)N[C@@H](CC(C)C)C(=O)N[C@@H](CC(C)C)C(O)=O
Prodelphinidin trimer GC-C-C	2	Rejected	898.2	0.008	0.089	2.467	-4.685	0	[H][C@]1(O)CC2=C(O[C@]1([H])C1=CC(O)=C(O)C=C1)C(=C(O)C=C2O)[C@]1([H])C2=C(O)C=C(O)C(=C2O[C@]([H])(C2=CC(O)=C(O)C(O)=C2)[C@@]1([H])O)[C@]1([H])C2=C(O)C=C(O)C=C2O[C@]([H])(C2=CC(O)=C(O)C(O)=C2)[C@@]1([H])O
Epicatechin-(2alpha->7,4alpha->8)-epicatechin 3-galactoside	2	Rejected	706.19	0.478	0.753	2.233	-3.374	0.003	OC[C@H]1O[C@H](O[C@@H]2[C@@H]3C4=C(O[C@]2(OC2=C3C3=C(CC[C@H](O3)C3=CC(O)=C(O)C=C3)C=C2)C2=CC(O)=C(O)C=C2)C=C(O)C=C4O)[C@H](O)[C@@H](O)[C@H]1O
Apigenin 6-C-arabinoside 8-C-glucoside	1	Rejected	564.15	0.034	0.796	-0.319	-1.829	0.08	OC[C@@H]1OC([C@H](O)[C@H]1O)C1=C(O)C(C2O[C@H](CO)[C@@H](O)[C@H](O)[C@H]2O)=C2OC(=CC(=O)C2=C1O)C1=CC=C(O)C=C1
Apigenin 6-C-galactoside 8-C-arabinoside	1	Rejected	564.15	0.035	0.777	-0.352	-1.375	0.081	OC[C@H]1OC([C@@H](O)[C@@H]1O)C1=C2OC(=CC(=O)C2=C(O)C(C2O[C@H](CO)[C@H](O)[C@H](O)[C@H]2O)=C1O)C1=CC=C(O)C=C1
Luteolin 7-malonylglucoside	2	Rejected	534.1	0.166	0.755	0.889	-4.118	0.019	O[C@H]1[C@H](O)[C@@H](COC(=O)CC(O)=O)O[C@@H](OC2=CC(O)=C3C(=O)C=C(OC3=C2)C2=CC=C(O)C(O)=C2)[C@@H]1O
Quercetin 3,4',7-triglucoside	1	Rejected	788.2	0.111	0.29	-2.58	-2.406	0.5	OCC1OC(OC2=CC3=C(C(O)=C2)C(=O)C(OC2OC(CO)C(O)C(O)C2O)=C(O3)C2=CC(O)=C(OC3OC(CO)C(O)C(O)C3O)C=C2)C(O)C(O)C1O
Quercetin 3-O-diglucoside	2	Rejected	626.15	0.055	0.802	-0.793	-3.128	0.066	OC[C@H]1O[C@@H](OC[C@H]2O[C@@H](OC3=C(OC4=C(C(O)=CC(O)=C4)C3=O)C3=CC(O)=C(O)C=C3)[C@H](O)[C@@H](O)[C@@H]2O)[C@H](O)[C@@H](O)[C@@H]1O
Quercetin 3-O-rhamnosyl-(1->2)-rhamnosyl-(1->6)-glucoside	3	Rejected	756.21	0.049	0.79	-0.273	-3.802	0.071	C[C@@H]1O[C@@H](O[C@@H]2[C@H](O)[C@@H](O)[C@H](C)O[C@H]2OC[C@H]2O[C@@H](OC3=C(OC4=CC(O)=CC(O)=C4C3=O)C3=CC(O)=C(O)C=C3)[C@H](O)[C@@H](O)[C@@H]2O)[C@H](O)[C@H](O)[C@H]1O
3,4-Dimethoxybenzoic acid	0	Accepted	182.06	0.053	0.011	1.7	-2.264	0.6	COC1=C(OC)C=C(C=C1)C(O)=O
Sanguisorbic acid dilactone	3	Rejected	470.01	0.104	0.076	1.756	-5.505	0.007	OC(=O)C1=CC(OC2=C3C(=O)OC4=C(O)C(O)=CC5=C4C3=C(OC5=O)C(O)=C2O)=C(O)C(O)=C1
4-p-Coumaroylquinic acid	2	Accepted	338.1	0.063	0.012	0.61	-1.296	0.769	O[C@@H]1CC(O)(C(=O)O)C[C@@H](O)C1OC(=O)\C=C\C1=CC=C(O)C=C1
Ferulic acid 4-glucoside	1	Accepted	356.11	0.231	0.101	-0.294	-1.939	0.31	COC1=CC(\C=C\C(O)=O)=CC=C1O[C@@H]1O[C@H](CO)[C@@H](O)[C@H](O)[C@H]1O
p-Coumaroyl tartaric acid glucosidic ester	3	Accepted	150.02	0.005	0.02	-1.786	-0.439	0.662	O[C@@H]([C@H](O)C(O)=O)C(O)=O
8-4'-Dehydrodiferulic acid	2	Accepted	386.1	0.676	0.005	2.78	-3.68	0.044	COC1=C(O)C=CC(\C=C(\OC2=C(OC)C=C(\C=C/C(O)=O)C=C2)C(O)=O)=C1
Cis-5-Caffeoylquinic acid	3	Accepted	354.1	0.111	0.033	0.331	-0.865	0.264	O[C@@H]1C[C@](O)(C[C@@H](OC(=O)\C=C/C2=CC=C(O)C(O)=C2)[C@@H]1O)C(O)=O
Dicaffeoylquinic acid	3	Rejected	516.13	0.239	0.036	1.896	-1.952	0.062	O[C@H]1[C@H](OC(=O)\C=C\C2=CC=C(O)C(O)=C2)C[C@@](O)(C[C@H]1OC(=O)\C=C\C1=CC=C(O)C(O)=C1)C(=O)O
p-Coumaroyl aspartic acid	2	Accepted	279.07	0.111	0.014	0.064	-1.083	0.039	OC(=O)CC(NC(=O)\C=C\C1=CC=C(O)C=C1)C(O)=O
Schottenol 3-ferulate	2	Rejected	590.43	0.034	0.004	9.286	-7.421	0.293	CC[C@H](CC[C@@H](C)[C@H]1CCC2C3=CC[C@@]4([H])C[C@H](CC[C@]4(C)C3CC[C@]12C)OC(=O)\C=C\C1=CC(OC)=C(O)C=C1)C(C)C
delta-Viniferin	1	Accepted	454.14	0.079	0.121	4.335	-3.971	0.01	[H][C@@]1(OC2=C(C=C(\C=C\C3=CC(O)=CC(O)=C3)C=C2)[C@]1([H])C1=CC(O)=CC(O)=C1)C1=CC=C(O)C=C1
5,5',6,6'-Tetrahydroxy-3,3'-biindolyl	4	Accepted	296.08	0.032	0.649	2.12	-4.6	0.014	OC1=CC2=C(C=C1O)C(=CN2)C1=CNC2=C1C=C(O)C(O)=C2
Hydroxytyrosol acetate	2	Accepted	196.07	0.532	0.642	1.252	-1.543	0.057	CC(=O)OCCC1=CC(O)=C(O)C=C1
p-HPEA-EA	3	Accepted	304.13	0.633	0.209	1.59	-3.582	0.281	[H]\C(C)=C(/C=O)C(CC=O)CC(=O)OCCC1=CC=C(O)C=C1
3'-Methoxyacetophenone	0	Accepted	150.07	0.276	0.026	1.79	-1.847	0.88	COC1=CC(=CC=C1)C(C)=O
Nuatigenin	0	Accepted	430.31	0.607	0.043	4.348	-4.986	0.529	CC1C2C(CC3C4CC=C5CC(O)CCC5(C)C4CCC23C)OC11CCC(C)(CO)O1
Estradiol	1	Accepted	272.18	0.734	0.029	4.108	-3.429	0.414	[H][C@@]12CC[C@H](O)[C@@]1(C)CC[C@]1([H])C3=C(CC[C@@]21[H])C=C(O)C=C3
Dioscin	1	Rejected	868.48	0.111	0.109	2.495	-3.182	0.041	CC1C2C(CC3C4CC=C5CC(CCC5(C)C4CCC23C)OC2OC(CO)C(OC3OC(C)C(O)C(O)C3OC3OC(C)C(O)C(O)C3O)C(O)C2O)OC11CCC(C)CO1
Collettiside I	0	Accepted	576.37	0.123	0.117	3.615	-4.233	0.047	CC1C2C(CC3C4CC=C5CC(CCC5(C)C4CCC23C)OC2OC(CO)C(O)C(O)C2O)OC11CCC(C)CO1
Yamogenin	0	Accepted	414.31	0.188	0.053	5.556	-5.869	0.701	CC1C2C(CC3C4CC=C5CC(O)CCC5(C)C4CCC23C)OC11CCC(C)CO1
Ophiopogonin C'	0	Rejected	722.42	0.112	0.128	2.93	-3.574	0.041	CC1C2C(CC3C4CC=C5CC(CCC5(C)C4CCC23C)OC2OC(CO)C(O)C(O)C2OC2OC(C)C(O)C(O)C2O)OC11CCC(C)CO1
Erythritol	0	Accepted	122.06	0.018	0.059	-2.024	0.181	0.417	OCC(O)C(O)CO
Canescein	2	Rejected	566.27	0.449	0.078	-0.52	-2.185	0.411	CC1OC(OC2CCC3(C=O)C4C(O)CC5(C)C(CCC5(O)C4CCC3(O)C2)C2=CC(=O)OC2)C(O)C(O)C1O
Prenyl acetate	0	Accepted	128.08	0.297	0.083	2.235	-1.666	0.996	CC(C)=CCOC(C)=O
Phytic acid	0	Rejected	659.86	0.004	0.01	-4.308	-0.039	0.153	OP(O)(=O)O[C@H]1[C@H](OP(O)(O)=O)[C@@H](OP(O)(O)=O)[C@H](OP(O)(O)=O)[C@H](OP(O)(O)=O)[C@@H]1OP(O)(O)=O
Asparagoside B	0	Rejected	596.39	0.017	0.059	2.651	-4.033	0.071	CC(CCC1(O)OC2CC3C4CCC5CC(O)CCC5(C)C4CCC3(C)C2C1C)COC1OC(CO)C(O)C(O)C1O
6-Hydroxykaempferol	2	Accepted	302.04	0.097	0.718	2.08	-3.487	0.005	OC1=CC=C(C=C1)C1=C(O)C(=O)C2=C(O1)C=C(O)C(O)=C2O
(3beta,5alpha)-Ergosta-7,23-dien-3-ol	0	Accepted	398.35	0.024	0.007	6.621	-6.886	0.947	CC(C)C(\C)=C\CC(C)C1CCC2C3=CCC4CC(O)CCC4(C)C3CCC12C
L-Malic acid caffeate	3	Accepted	296.05	0.312	0.008	0.878	-1.214	0.142	OC(=O)CC(OC(=O)\C=C\C1=CC=C(O)C(O)=C1)C(O)=O
1-Methoxyphaseollidin	1	Accepted	354.15	0.074	0.123	4.78	-3.128	0.026	COC1=C2C3OC4=C(C=CC(O)=C4CC=C(C)C)C3COC2=CC(O)=C1
(3beta,5alpha,6alpha)-Cholest-8-ene-3,6-diol	0	Accepted	402.35	0.031	0.046	6.111	-6.043	0.753	CC(C)CCCC(C)C1CCC2C3=C(CCC12C)C1(C)CCC(O)CC1C(O)C3
Mucronine D	2	Rejected	661.38	0.053	0.019	4.344	-4.463	0.15	CCC(C)C1NC(=O)C2C(CCN2C(=O)C(CC(C)C)NC(=O)C(CC2=CC=CC=C2)N(C)C)OC2=CC=C(OC)C(=C2)\C=C/NC1=O
Nummularine A	2	Rejected	647.37	0.041	0.03	4.168	-4.111	0.074	CCC(C)C1NC(=O)C2C(CCN2C(=O)C(CC(C)C)NC(=O)C(CC2=CC=CC=C2)NC)OC2=CC=C(OC)C(=C2)\C=C/NC1=O
Oxoglaucine	0	Accepted	351.11	0.092	0.605	3.13	-5.487	0.102	COC1=CC2=C(C=C1OC)C1=C(OC)C(OC)=CC3=C1C(=NC=C3)C2=O
beta1-Tomatidine	1	Rejected	901.5	0.016	0.092	-0.62	-1.806	0.12	CC1C2C(CC3C4CCC5CC(CCC5(C)C4CCC23C)OC2OC(CO)C(OC3OC(CO)C(O)C(O)C3OC3OC(CO)C(O)C(O)C3O)C(O)C2O)OC11CCC(C)CN1
Blepharin	1	Accepted	327.1	0.737	0.618	-0.644	-2.231	0.471	OCC1OC(OC2OC3=CC=CC=C3NC2=O)C(O)C(O)C1O
Murrayenol	1	Accepted	470.34	0.028	0.03	5.192	-4.332	0.67	CC1(C)OC1C1CC(C(O)O1)C1CCC2(C)C3=CCC4C(C)(C)C(O)C=CC4(C)C3CCC12C
Geranyl apiosyl-glucoside	0	Accepted	448.23	0.076	0.094	-0.328	-1.459	0.235	CC(C)=CCC\C(C)=C/COC1OC(COC2OCC(O)(CO)C2O)C(O)C(O)C1O
Geranyl rhamnosyl-glucoside	0	Accepted	462.25	0.067	0.178	-0.316	-1.79	0.232	CC1OC(OCC2OC(OC\C=C(\C)CCC=C(C)C)C(O)C(O)C2O)C(O)C(O)C1O
Geranyl 3-methylbutanoate	0	Accepted	238.19	0.269	0.006	4.603	-4.615	0.769	CC(C)CC(=O)OC\C=C(\C)CCC=C(C)C
Geranyl hexanoate	0	Accepted	252.21	0.21	0.004	5.142	-4.949	0.722	CCCCCC(=O)OC\C=C(\C)CCC=C(C)C
Neryl glucoside	0	Accepted	316.19	0.093	0.063	0.563	-1.814	0.278	CC(C)=CCC\C(C)=C/COC1OC(CO)C(O)C(O)C1O
Neryl arabinofuranosyl-glucoside	0	Accepted	448.23	0.078	0.158	-0.61	-1.427	0.255	CC(C)=CCC\C(C)=C/COC1OC(COC2OC(CO)C(O)C2O)C(O)C(O)C1O
Galactosyl 4-hydroxyproline	0	Accepted	293.11	0.074	0.062	-2.548	-0.235	0.306	OCC1OC(OC(=O)C2CC(O)CN2)C(O)C(O)C1O
4-Hydroxyproline galactoside	0	Accepted	293.11	0.067	0.04	-3.319	-0.397	0.532	OCC1OC(OC2CNC(C2)C(O)=O)C(O)C(O)C1O
N-Phenylacetylaspartic acid	0	Accepted	251.08	0.031	0.01	0.421	-1.26	0.102	OC(=O)CC(NC(=O)CC1=CC=CC=C1)C(O)=O
Betavulgaroside I	2	Rejected	954.45	0.084	0.114	3.076	-3.654	0.114	CC1(C)CCC2(CCC3(C)C(=CCC4C5(C)CCC(OC6OC(C7OC(O)(C(OCC(O)=O)OC7C6O)C(O)=O)C(O)=O)C(C)(C)C5CCC34C)C2C1)C(=O)OC1OC(CO)C(O)C(O)C1O
5Z-Octenyl acetate	0	Accepted	170.13	0.604	0.047	2.361	-2.878	0.997	CC\C=C/CCCCOC(C)=O
(R)-1,3-Octanediol	0	Accepted	146.13	0.046	0.009	1.345	-1.005	0.735	CCCCCC(O)CCO
(R)-1-O-b-D-glucopyranosyl-1,3-octanediol	0	Accepted	308.18	0.021	0.108	-0.399	-0.62	0.306	CCCCCC(O)CCOC1OC(CO)C(O)C(O)C1O
Salsolinol	2	Accepted	179.09	0.079	0.709	0.306	-1.545	0.036	CC1NCCC2=C1C=C(O)C(O)=C2
(S)-Salsolinol	2	Accepted	179.09	0.079	0.709	0.306	-1.545	0.036	CC1NCCC2=C1C=C(O)C(O)=C2
N-Methyltyramine	1	Accepted	151.1	0.059	0.093	0.872	-1.126	0.631	CNCCC1=CC=C(O)C=C1
O-Methylcorypalline	0	Accepted	207.13	0.129	0.017	1.655	-1.807	0.997	COC1=CC2=C(CN(C)CC2)C=C1OC
alpha-Solanigrine	0	Accepted	413.33	0.131	0.033	5.075	-5.038	0.597	CC1C2C(CC3C4CC=C5CC(O)CCC5(C)C4CCC23C)OC11CCC(C)CN1
gamma2-Solamarine	0	Rejected	721.44	0.072	0.115	2.723	-3.252	0.031	CC1C2C(CC3C4CC=C5CC(CCC5(C)C4CCC23C)OC2OC(CO)C(OC3OC(C)C(O)C(O)C3O)C(O)C2O)OC11CCC(C)CN1
2'-Hydroxydaidzein	1	Accepted	270.05	0.42	0.105	2.555	-3.477	0.03	OC1=CC(O)=C(C=C1)C1=COC2=C(C=CC(O)=C2)C1=O
Solacauline	0	Rejected	823.47	0.167	0.131	2.051	-3.149	0.064	CC1C2CCC(C)CN2C2CC3C4CC=C5CC(CCC5(C)C4CCC3(C)C12)OC1OCC(OC2OCC(OC3OC(CO)C(O)C(O)C3O)C(O)C2O)C(O)C1O
(E,E)-Trichostachine	4	Accepted	271.12	0.879	0.009	2.363	-3.99	0.763	O=C(\C=C\C=C\C1=CC=C2OCOC2=C1)N1CCCC1
L-Tyrosine ethyl ester hydrochloride	1	Accepted	209.11	0.116	0.036	0.923	-1.662	0.139	Cl.CCOC(=O)C(N)CC1=CC=C(O)C=C1
L-Tyrosine	1	Accepted	181.07	0.141	0.023	-2.191	-2.178	0.151	NC(CC1=CC=C(O)C=C1)C(O)=O
Papaverine	0	Accepted	339.15	0.139	0.375	2.889	-4.047	0.092	COC1=C(OC)C=C(CC2=NC=CC3=CC(OC)=C(OC)C=C23)C=C1
Piperine	3	Accepted	285.14	0.853	0.008	2.841	-4.324	0.715	O=C(\C=C\C=C\C1=CC2=C(OCO2)C=C1)N1CCCCC1
Chavicine	3	Accepted	285.14	0.853	0.008	2.841	-4.324	0.715	O=C(\C=C\C=C\C1=CC2=C(OCO2)C=C1)N1CCCCC1
Isochavicine	3	Accepted	285.14	0.853	0.008	2.841	-4.324	0.715	O=C(\C=C\C=C\C1=CC2=C(OCO2)C=C1)N1CCCCC1
Isopiperine	3	Accepted	285.14	0.853	0.008	2.841	-4.324	0.715	O=C(\C=C\C=C\C1=CC2=C(OCO2)C=C1)N1CCCCC1
Theophylline	0	Accepted	180.06	0.067	0.022	0.153	-1.815	0.88	CN1C2=C(NC=N2)C(=O)N(C)C1=O
Theobromine	1	Accepted	180.06	0.112	0.052	-0.623	-2.504	0.773	CN1C=NC2=C1C(=O)NC(=O)N2C
Chlorogenoquinone	2	Accepted	352.08	0.799	0.927	-0.249	-1.319	0.242	OC1CC(O)(CC(OC(=O)\C=C/C2=CC(=O)C(=O)C=C2)C1O)C(O)=O
L-Saccharopine	0	Accepted	276.13	0.083	0.018	-4.777	-1.892	0.195	NC(CCCCNC(CCC(O)=O)C(O)=O)C(O)=O
L-Stachydrine	0	Accepted	143.09	0.017	0.004	-2.711	-0.123	0.287	C[N+]1(C)CCC[C@H]1C([O-])=O
Isodesmosine	0	Rejected	525.28	0.091	0.023	-6.327	-2.845	0.396	NC(CCCC1=[N+](CCCCC(N)C([O-])=O)C=C(CCC(N)C(O)=O)C=C1CCC(N)C(O)=O)C(O)=O
L-3-Aminodihydro-2(3H)-furanone	0	Accepted	101.05	0.149	0.247	-1.081	0.392	0.35	NC1CCOC1=O
Neochrome	1	Accepted	600.42	0.057	0.36	4.979	-5.41	0.119	[H]\C(=C(/[H])\C(\[H])=C(/C)C([H])=C([H])C(\[H])=C(\C)C1OC2(C)CC(O)CC(C)(C)C2=C1)\C(\[H])=C(/C)\C(\[H])=C(\[H])/C(/[H])=C(\C)C=C=C1C(C)(C)CC(O)CC1(C)O
(E)-2-Propenyl-1-propenyl disulfide	3	Accepted	146.02	0.372	0.703	2.8	-3.254	0.776	C\C=C\SSCC=C
(Z)-2-Propenyl-1-propenyl disulfide	3	Accepted	146.02	0.541	0.752	2.542	-2.807	0.918	C\C=C/SSCC=C
1,2-(2-Propenyl)-disulfane	3	Accepted	146.02	0.227	0.592	2.452	-3.508	0.799	C=CCSSCC=C
1,2-Dimercaptocyclopentane	1	Accepted	134.02	0.812	0.891	2.35	-2.436	0.009	SC1CCCC1S
1,2-Epithiopropane	0	Accepted	74.02	0.894	0.076	1.369	-1.401	0.966	CC1CS1
1-Propenylallyl thiosulfinate	3	Accepted	162.02	0.824	0.962	1.555	-1.618	0.161	C\C=C\SS(=O)CC=C
2,5-Dimethyltetrahydrothiophene	0	Accepted	116.07	0.878	0.033	2.355	-2.308	0.963	CC1CCC(C)S1
2-Propenyl-1-propenyl disulfide	3	Accepted	146.02	0.372	0.703	2.8	-3.254	0.776	C\C=C\SSCC=C
2-Propenyl tetrasulfide	2	Accepted	169.94	0.5	0.963	1.685	-4.176	0.942	SSSSCC=C
3-Methyl-2-cyclopentene-1-thione	2	Accepted	112.03	0.757	0.035	1.096	-1.118	0.993	CC1=CC(=S)CC1
3-Vinyl-1,2-dithiacyclohex-4-ene	1	Accepted	144.01	0.667	0.906	2.141	-2.854	0.86	C=CC1SSCC=C1
3-Vinyl-1,2-dithiin	1	Accepted	144.01	0.471	0.638	2.665	-2.792	0.92	C=CC1CC=CSS1
3-Vinyl-4H-1,2-dithiin	1	Accepted	144.01	0.471	0.638	2.665	-2.792	0.92	C=CC1CC=CSS1
S-Butylcysteine sulfoxide	2	Accepted	193.08	0.791	0.317	-2.387	-1.049	0.462	CCCCS(=O)C[C@H](N)C(O)=O
Adenosine	1	Accepted	267.1	0.144	0.316	-2.028	-1.081	0.454	NC1=C2N=CN([C@@H]3O[C@H](CO)[C@@H](O)[C@H]3O)C2=NC=N1
Allyl-1-propenyl tetrasulfide	2	Accepted	209.97	0.216	0.941	2.534	-4.941	0.97	C\C=C\SSSSCC=C
Allyl-1-propenyl trisulfide	2	Accepted	177.99	0.278	0.9	2.541	-4.345	0.925	C\C=C\SSSCC=C
Aniline	1	Accepted	93.06	0.701	0.752	0.966	-0.149	0.772	NC1=CC=CC=C1
Auxin	2	Accepted	175.06	0.134	0.044	1.762	-2.107	0.324	[O-]C(=O)CC1=CNC2=CC=CC=C12
Calcium oxalate	1	Accepted	87.98	0.023	0.085	-2.797	-0.22	0.319	[Ca++].[O-]C(=O)C([O-])=O
Chitinase	0	Accepted	226.11	0.017	0.022	-2.888	-0.791	0.862	NCCC(=O)NC(CC1=CNC=N1)C(O)=O
cis-2-Propenyl-1-propenyl disulfide	3	Accepted	146.02	0.541	0.752	2.542	-2.807	0.918	C\C=C/SSCC=C
cis-Ajoene	5	Accepted	234.02	0.903	0.978	1.199	-2.183	0.11	C=CCSS\C=C/CS(=O)CC=C
Di-1-propenyl trisulfide	0	Accepted	177.99	0.058	0.873	2.826	-4.08	0.639	[H]\C(C)=C(\[H])SSS\C([H])=C(/[H])C
Di-2-propenyl-sulfane	2	Accepted	114.05	0.46	0.104	2.326	-2.012	0.936	C=CCSCC=C
17alpha-ethynylestradiol	1	Accepted	296.18	0.944	0.024	4.257	-4.52	0.327	[H][C@@]12CC[C@@](O)(C#C)[C@@]1(C)CC[C@]1([H])C3=C(CC[C@@]21[H])C=C(O)C=C3
Ethyl 2-propene sulfinate	2	Accepted	134.04	0.964	0.969	0.792	-0.02	0.991	CCOS(=O)CC=C
F-Chlorogenin	0	Accepted	432.32	0.43	0.045	5.1	-4.844	0.356	[H][C@]12C[C@@]3([H])[C@]4([H])C[C@]([H])(O)[C@@]5([H])C[C@@]([H])(O)CC[C@]5(C)[C@@]4([H])CC[C@]3(C)[C@@]1([H])[C@]([H])(C)[C@@]1(CC[C@@]([H])(C)CO1)O2
F-Tigogenin	0	Accepted	416.33	0.528	0.152	6.281	-5.391	0.284	[H][C@]12C[C@@]3([H])[C@]4([H])CC[C@@]5([H])C[C@@H](O)CC[C@]5(C)[C@@]4([H])CC[C@]3(C)[C@@]1([H])[C@H](C)[C@@]1(CC[C@H](C)CO1)O2
gamma-Glutamyl-cysteine	1	Accepted	250.06	0.038	0.779	-3.105	-1.223	0.126	N[C@@H](CCC(=O)N[C@@H](CS)C(O)=O)C(O)=O
gamma-L-Glutamyl-L-leucine	0	Accepted	260.14	0.025	0.013	-2.416	-1.356	0.567	CC(C)C[C@H](NC(=O)CC[C@H](N)C(O)=O)C(O)=O
gamma-L-Glutamyl-L-phenylalanine	0	Accepted	294.12	0.025	0.012	-2.314	-1.738	0.277	NC(CC\C(O)=N\C(CC1=CC=CC=C1)C(O)=O)C(O)=O
Guanosine	1	Accepted	283.09	0.948	0.226	-2.478	-2.224	0.933	NC1=NC(=O)C2=C(N1)N(C=N2)C1OC(CO)C(O)C1O
Heptadecanone	1	Accepted	254.26	0.043	0.006	6.524	-6.227	0.509	CCCCCCCCCCC(=O)CCCCCC
Hexa-1,5-dienyl trisulfide	1	Accepted	177.99	0.464	0.861	3.217	-4.505	0.546	SSS\C=C\CCC=C
Methane sulfinothiocic acid 2-propenyl-ester	0	Accepted	152	0.221	0.872	1.283	-1.277	0.995	CC=CSS(C)(=O)=O
Methyl-1-propenyl trisulfide	0	Accepted	151.98	0.123	0.813	2.087	-3.888	0.58	CSSSC=CC
Methylajoene	0	Accepted	54.05	0.932	0.555	1.764	-1.836	0.913	CC=C=C
Methylallyl hexasulfide	2	Accepted	247.9	0.218	0.924	1.753	-4.942	0.997	CSSSSSSCC=C
Methylcysteine sulfoxide	3	Accepted	324.18	0.894	0.078	5.396	-6.367	0.495	CNC(CS)C(O)=O.CCCCCCCCS(=O)C(C)CC1=CC2=C(OCO2)C=C1
Methylpropenyl tetrasulfide	0	Accepted	183.95	0.117	0.82	1.973	-4.733	0.904	CSSSS\C=C\C
Methyl-trans-1-propenyl thiosulfinate	1	Accepted	136	0.224	0.747	0.885	-1.404	0.534	CSS(=O)\C=C\C
Methyl-trans-propenyl disulfide	1	Accepted	120.01	0.131	0.25	2.383	-2.932	0.844	CSS\C=C\C
Ornithine	0	Accepted	132.09	0.08	0.317	-3.779	-0.354	0.323	NCCCC(N)C(O)=O
Pentadecanone	1	Accepted	226.23	0.049	0.007	5.524	-5.216	0.907	CCCCCCCCC(=O)CCCCCC
Polysaccharides	0	Rejected	504.17	0.008	0.097	-4.064	0.411	0.421	OCC1OC(OC2C(O)C(O)C(OC3C(O)C(O)C(O)OC3CO)OC2CO)C(O)C(O)C1O
cis-1-Propenyl allyl disulfide	3	Accepted	146.02	0.541	0.752	2.542	-2.807	0.918	C\C=C/SSCC=C
Propene	1	Accepted	42.05	0.115	0.762	1.758	-2.031	0.995	CC=C
Propyl allyl trisulfide	2	Accepted	180.01	0.508	0.783	2.64	-4.596	0.925	CCCSSSCC=C
Prostaglandin A-1	2	Accepted	336.23	0.664	0.03	3.715	-3.896	0.02	CCCCCC(O)\C=C/C1C=CC(=O)C1CCCCCCC(O)=O
Prostaglandin A-2	2	Accepted	334.21	0.848	0.012	3.452	-3.884	0.047	CCCCCC(O)\C=C\C1C=CC(=O)C1C\C=C\CCCC(O)=O
Prostaglandin B-1	2	Accepted	336.23	0.664	0.03	3.715	-3.896	0.02	CCCCCC(O)\C=C/C1=C(CCCCCCC(O)=O)C(=O)CC1
Prostaglandin B-2	2	Accepted	334.21	0.848	0.012	3.452	-3.884	0.047	CCCCCC(O)\C=C\C1=C(C\C=C\CCCC(O)=O)C(=O)CC1
Prostaglandin E-1	0	Accepted	354.24	0.044	0.009	2.901	-4.125	0.021	CCCCCC(O)\C=C\C1C(O)CC(=O)C1CCCCCCC(O)=O
Prostaglandin E-2	0	Accepted	352.22	0.088	0.006	1.698	-4.165	0.005	CCCCCC(O)\C=C\C1C(O)CC(=O)C1C\C=C/CCCC(O)=O
Prostaglandin F-1-alpha	0	Accepted	356.26	0.033	0.01	3.114	-4.234	0.078	CCCCCC(O)\C=C\C1C(O)CC(O)C1CCCCCCC(O)=O
Prostaglandin F-2-alpha	0	Accepted	354.24	0.037	0.004	2.503	-4.387	0.014	CCCCCC(O)\C=C\C1C(O)CC(O)C1C\C=C\CCCC(O)=O
Protoeruboside B	2	Rejected	1260.6	0.01	0.035	-3.689	0.081	0.227	CC(CCC1(O)OC2CC3C4CC(O)C5CC(CCC5(C)C4CCC3(C)C2C1C)OC1OC(CO)C(OC2OC(CO)C(O)C(OC3OC(CO)C(O)C(O)C3O)C2OC2OC(CO)C(O)C(O)C2O)C(O)C1O)COC1OC(CO)C(O)C(O)C1O
S-Allylmercaptocysteine	3	Accepted	193.02	0.275	0.256	-2.035	-2.725	0.584	N[C@@H](CSSCC=C)C(O)=O
S-Methyl-L-cysteine sulfoxide	2	Accepted	151.03	0.82	0.229	-3.043	-0.899	0.311	CS(=O)C[C@H](N)C(O)=O
S-N-Methylcysteine	0	Accepted	135.04	0.211	0.012	-2.465	-1.56	0.54	CSC[C@H](N)C(O)=O
S-Propenylcysteine	0	Accepted	161.05	0.358	0.023	-1.817	-1.283	0.364	C\C=C\SC[C@H](N)C(O)=O
S-Propylcysteine sulphoxide	2	Accepted	179.06	0.819	0.315	-2.618	-0.934	0.497	CCCS(=O)C[C@H](N)C(O)=O
Salicylates	1	Accepted	138.03	0.046	0.018	2.221	-1.854	0.456	OC(=O)C1=CC=CC=C1[O-]
Sapogenins	0	Accepted	400.33	0.276	0.113	7.524	-6.501	0.167	[H][C@]12C[C@@]3([H])[C@]4([H])CCC5([H])CCCC[C@]5(C)[C@@]4([H])CC[C@]3(C)[C@@]1([H])[C@]([H])(C)[C@@]1(CC[C@]([H])(C)CO1)O2
Saponins	2	Rejected	1130.55	0.017	0.042	0.584	-2.871	0.157	[H]\C(C)=C(/C)C(=O)O[C@@]1([H])[C@]([H])(OC(C)=O)[C@]2(CO)[C@]([H])(O)C[C@]3(C)C(=CCC4([H])[C@@]5(C)CC[C@]([H])(O[C@]6([H])O[C@]([H])(C(O)=O)[C@@]([H])(O[C@]7([H])O[C@]([H])(CO)[C@@]([H])(O)[C@]([H])(O)[C@@]7([H])O)[C@]([H])(O)[C@@]6([H])O[C@]6([H])O[C@]([H])(CO)[C@@]([H])(O)[C@]([H])(O)[C@@]6([H])O)[C@](C)(CO)C5([H])CC[C@@]34C)C2([H])CC1(C)C
Sterols	0	Accepted	248.21	0.046	0.056	4.514	-5.79	0.272	OC1CCC2C(CCC3C4CCCC4CCC23)C1
Sugars	0	Rejected	342.12	0.019	0.115	-2.708	-0.206	0.249	OC[C@H]1O[C@@](CO)(O[C@H]2O[C@H](CO)[C@@H](O)[C@H](O)[C@H]2O)[C@@H](O)[C@@H]1O
trans-1-Propenyl allyl thiosulfinate	3	Accepted	162.02	0.824	0.962	1.555	-1.618	0.161	C\C=C\SS(=O)CC=C
trans-1-Propenyl methyl thiosulfinate	1	Accepted	136	0.719	0.902	1.258	-1.949	0.708	C\C=C\SS(C)=O
trans-S-(1-Propenyl)-cysteine disulfide	1	Accepted	193.02	0.274	0.247	-1.642	-2.234	0.576	C\C=C\SSC[C@H](N)C(O)=O
1-O-Feruloyl-beta-D-glucose	2	Accepted	356.11	0.097	0.218	-0.25	-0.537	0.545	COC1=C(O)C=CC(\C=C\C(=O)O[C@H]2C(O)O[C@H](CO)[C@@H](O)[C@@H]2O)=C1
cis-Propyl 2-propenyl disulfide	3	Accepted	148.04	0.538	0.416	2.823	-3.683	0.898	CCCSSCC=C
Dialanine	0	Accepted	160.08	0.01	0.008	-2.152	-0.064	0.766	CC(N)C(O)=NC(C)C(O)=O
Dotriacontanal	1	Accepted	464.5	0.025	0.016	13.232	-7.514	0.001	CCCCCCCCCCCCCCCCCCCCCCCCCCCCCCCC=O
S-(1-Propenyl)-cysteine sulfoxide	2	Accepted	177.05	0.783	0.498	-2.506	-0.688	0.293	C\C=C\S(=O)C[C@H](N)C(O)=O
trans-Propyl 2-propenyl disulfide	3	Accepted	148.04	0.538	0.416	2.823	-3.683	0.898	CCCSSCC=C
4-O-Methylglucuronic acid	3	Accepted	208.06	0.009	0.231	-2.165	-0.137	0.859	[H][C@](O)(C=O)[C@@]([H])(O)[C@]([H])(OC)[C@]([H])(O)C(O)=O
alpha-Catechin	2	Accepted	290.08	0.159	0.616	1.213	-2.72	0.025	O[C@@H]1CC2=C(O)C=C(O)C=C2O[C@@H]1C1=CC(O)=C(O)C=C1
Cardanol	1	Accepted	302.26	0.029	0.003	7.715	-5.109	0.059	CCCCCC\C=C\CCCCCCCC1=CC(O)=CC=C1
Gadoleic acid	0	Accepted	310.29	0.071	0.013	7.036	-3.238	0.013	[H]\C(CCCCCCCCCC)=C(/[H])CCCCCCCC(O)=O
5-Stigmastene-3beta,7alpha-diol	0	Accepted	430.38	0.022	0.006	6.072	-5.987	0.25	CC[C@H](CC[C@@H](C)C1CCC2C3[C@H](O)C=C4C[C@@H](O)CC[C@]4(C)C3CC[C@]12C)C(C)C
Esters	2	Accepted	414.35	0.367	0.007	8.049	-7.14	0.343	[H][C@@](C)(CCCC(C)C)[C@@]1([H])CC[C@@]2([H])[C@]3([H])CC=C4C[C@]([H])(CC[C@]4(C)[C@@]3([H])CC[C@]12C)OC=O
Methyl-beta-hydroxybutyrate	0	Accepted	118.06	0.1	0.073	-0.166	0.656	0.837	COC(=O)CC(C)O
Methyl-beta-hydroxyhexanoate	0	Accepted	146.09	0.121	0.035	0.853	-0.965	0.841	CCCC(O)CC(=O)OC
Methyl-beta-methylthiopropionate	0	Accepted	134.04	0.527	0.019	1.084	-1.846	0.995	COC(=O)CCSC
Methylisocaproate	0	Accepted	130.1	0.243	0.014	2.302	-2.089	0.995	COC(=O)CCC(C)C
Phosphatase	2	Accepted	216.98	0.886	0.976	-0.039	-1.369	0.454	O.O.O.O.O.O.[Na+].[Na+].[O-][N+](=O)C1=CC=C(OP([O-])([O-])=O)C=C1
1,5-Cineole	0	Accepted	154.14	0.69	0.041	3.235	-3.008	0.318	CC(C)C1CC[C@@]2(C)C[C@@H]1O2
1-Dihydrocarveol	0	Accepted	154.14	0.449	0.026	2.579	-2.285	0.973	CC1CCC(CC1O)C(C)=C
2-Dihydrocarveol	0	Accepted	154.14	0.449	0.026	2.579	-2.285	0.973	CC1CCC(CC1O)C(C)=C
3,6-Dimethyl-2,3,4,5,8,9-hexahydrobenzofuran	0	Accepted	152.12	0.516	0.681	2.872	-2.62	0.673	CC1COC2C=C(C)CCC12
3,6-Dimethylcoumaran	0	Accepted	148.09	0.755	0.784	3.331	-3.421	0.584	CC1COC2=CC(C)=CC=C12
4-Methylaesculetin	3	Accepted	192.04	0.149	0.088	1.402	-2.54	0.03	CC1=CC(=O)OC2=C1C=C(O)C(O)=C2
alpha-Carvone	0	Accepted	150.1	0.432	0.029	2.136	-1.916	0.99	CC(=C)C1CC=C(C)C(=O)C1
alpha-Pyronene	0	Accepted	136.13	0.147	0.009	3.873	-3.984	0.421	CC1C(C)=CC=CC1(C)C
beta-Eudesmol	0	Accepted	222.2	0.069	0.009	3.943	-3.551	0.194	CC(C)(O)[C@@H]1CC[C@@]2(C)CCCC(=C)[C@@H]2C1
Calamenene	0	Accepted	202.17	0.147	0.216	5.166	-5.954	0.562	CC(C)C1CCC(C)C2=CC=C(C)C=C12
Carotene	1	Rejected	536.44	0.065	0.085	7.687	-5.026	0	C\C(\C=C\C=C(/C)\C=C\C1=C(C)CCCC1(C)C)=C/C=C/C=C(\C)/C=C/C=C(\C)/C=C/C1=C(C)CCCC1(C)C
cis-Carveol	0	Accepted	152.12	0.764	0.007	2.437	-1.997	0.962	CC(=C)C1CC=C(C)C(O)C1
cis-Ligustilide	1	Accepted	192.12	0.847	0.328	2.965	-3.329	0.083	CCC1(C)C2OC(=O)C3C=CCCC123
D-(+)-dihydrocarvone	0	Accepted	152.12	0.835	0.133	2.264	-1.979	0.978	C[C@@H]1CC[C@H](CC1=O)C(C)=C
Dillanol	2	Accepted	308.07	0.59	0.637	4.047	-4.521	0.007	COC1=CC2=C(C=C1)C=CC1=C2C(=O)C2=C(O1)C=C(O)C=C2O
Dillanoside	2	Accepted	470.12	0.937	0.72	1.939	-4.226	0.1	COC1=CC2=C(C=C1)C=CC1=C2C(=O)C2=C(O1)C=C(OC1OC(CO)C(O)C(O)C1O)C=C2O
gamma-Pinene	0	Accepted	136.13	0.045	0.006	4.01	-4.059	0.253	CC1C=C[C@H]2C[C@@H]1C2(C)C
Germacrene D	0	Accepted	204.19	0.186	0.016	4.87	-5.734	0.904	CC(C)[C@@H]1CC\C(C)=C\CCC(=C)\C=C\1
Isopiperitenone	1	Accepted	150.1	0.788	0.037	2.039	-2.022	0.09	CC(=C)C1CCC(C)=CC1=O
Neocnidolide	1	Accepted	194.13	0.729	0.069	4.149	-4.487	0.127	[H][C@@]1(CCCC)OC(=O)C2=CCCC[C@@]12[H]
Neophytadiene	2	Accepted	278.3	0.082	0.013	8.007	-7.116	0.513	CC(C)CCCC(C)CCCC(C)CCCC(=C)C=C
p-Mentha-2,4(8)-diene	0	Accepted	136.13	0.84	0.012	3.895	-4.085	0.374	CC1CCC(C=C1)=C(C)C
Phellandrene	0	Accepted	136.13	0.344	0.011	3.857	-3.985	0.835	CC(C)C1CC=C(C)C=C1
trans-Carveol	0	Accepted	152.12	0.764	0.007	2.437	-1.997	0.962	CC(=C)C1CC=C(C)C(O)C1
trans-Dihydrocarvone	0	Accepted	152.12	0.835	0.133	2.264	-1.979	0.978	C[C@@H]1CC[C@H](CC1=O)C(C)=C
Vicenin	1	Rejected	626.15	0.048	0.492	-0.683	-2.06	0.105	OC[C@H]1O[C@@H](OC2=C(O)C3=C(OC(=CC3=O)C3=CC=C(O)C=C3)C(O[C@@H]3O[C@H](CO)[C@@H](O)[C@H](O)[C@H]3O)=C2O)[C@H](O)[C@@H](O)[C@@H]1O
1,2-Disehydronorcoclaurine	2	Accepted	269.11	0.156	0.615	2.517	-2.847	0.064	OC1=CC=C(CC2=NCCC3=C2C=C(O)C(O)=C3)C=C1
14-Hydroxy-25-desoxyrollinicin	1	Rejected	638.48	0.019	0.074	7.62	-4.272	0.009	CCCCCCCCCCC(O)C1CCC(O1)C1CCC(O1)C(O)C(O)CCCCCCCCCC(O)CC1=CC(C)OC1=O
Lirodenine	1	Accepted	452.08	0.482	0.078	3.207	-4.359	0.143	O=P(C1=CC=CC=C1)(C1=CC=C(C=C1)C#N)P(=O)(C1=CC=CC=C1)C1=CC=C(C=C1)C#N
(E)-8(9)-p-Menthen-1,2-diol	0	Accepted	170.13	0.74	0.051	1.777	-1.59	0.828	CC(=C)[C@H]1CC[C@@](C)(O)C(O)C1
(E)-alpha-Bergamotene	0	Accepted	204.19	0.691	0.007	5.979	-4.875	0.174	CC(C)=CCC[C@@]1(C)[C@H]2C[C@@H]1C(C)=CC2
1,4-Dimethyl-7-(1-methylethenyl)-octahydroazulene	0	Accepted	204.19	0.038	0.007	5.34	-5.951	0.011	[H][C@@]1(C)CC[C@@]2([H])C1=C[C@@]([H])(CC[C@@]2([H])C)C(C)=C
3-Methyl-4-ethylhexane	0	Accepted	128.16	0.042	0.004	4.676	-4.825	0.819	CCC(C)C(CC)CC
3-N-Butyl-4,5-dihydrophthalide	1	Accepted	192.12	0.838	0.073	4.292	-3.806	0.381	CCCCC1OC(=O)C2=C1CCC=C2
3-N-Butylhexahydrophthalide	0	Accepted	196.15	0.126	0.015	3.866	-4.224	0.932	CCCCC1OC(=O)C2CCCCC12
8-Hydroxyfalcarinone	7	Accepted	258.16	0.385	0.614	4.329	-4.793	0.002	CCCCCCC\C=C\C(O)C#CC#CC(=O)C=C
Alloocimene I	1	Accepted	136.13	0.392	0.009	2.836	-2.951	0.838	[H]\C(C=C(C)C)=C(\[H])/C(/C)=C(\[H])C
alpha-Cedrene	0	Accepted	204.19	0.036	0.002	5.349	-5.203	0.099	[H][C@@]12CC[C@@H](C)[C@]11C[C@@H](C(C)=CC1)C2(C)C
alpha-Eudesmol	0	Accepted	222.2	0.082	0.003	4.508	-3.806	0.363	CC1=CCC[C@]2(C)CC[C@H](CC12)C(C)(C)O
Apigenin 7-apiosyl-glucoside	1	Rejected	564.15	0.242	0.753	0.736	-3.765	0.061	OC[C@@]1(O)CO[C@@H](OC[C@H]2O[C@@H](OC3=CC4=C(C(O)=C3)C(=O)C=C(O4)C3=CC=C(O)C=C3)[C@H](O)[C@@H](O)[C@@H]2O)[C@@H]1O
Apiumetrin	1	Accepted	432.11	0.484	0.716	1.337	-3.964	0.029	[H][C@]1(CO)O[C@@]([H])(OC2=CC(O)=C3C(=O)C=C(OC3=C2)C2=CC=C(O)C=C2)[C@]([H])(O)[C@@]([H])(O)[C@]1([H])O
Benzoyl benzoate	1	Accepted	226.06	0.017	0.007	3.214	-4.363	0.369	O=C(OC(=O)C1=CC=CC=C1)C1=CC=CC=C1
Choline ascorbate	0	Accepted	104.11	0.015	0.003	-2.296	0.081	0.255	C[N+](C)(C)CCO.[H][C@](O)(C[O-])C1([H])OC(=O)C(O)=C1O
Chrysoeriol 7-apiosyl-glucoside	1	Rejected	594.16	0.185	0.643	0.725	-3.821	0.098	COC1=CC(=CC=C1O)C1=CC(=O)C2=C(O1)C=C(O[C@@H]1O[C@H](CO)[C@@H](O)[C@H](O)[C@H]1O[C@@H]1OC[C@](O)(CO)[C@H]1O)C=C2O
cis-3-Hexen-1-yl pyruvate	2	Accepted	170.09	0.181	0.209	1.067	-2.095	0.737	CC\C=C/CCOC(=O)C(C)=O
cis-Carvyl acetate	0	Accepted	194.13	0.792	0.124	3.283	-2.621	0.93	CC(=O)O[C@H]1C[C@H](CC=C1C)C(C)=C
cis-p-Mentha-1(7),8-dien-2-yl acetate	0	Accepted	194.13	0.922	0.108	2.598	-2.478	0.973	CC(=C)C1CCC(=C)C(C1)OC(C)=O
Cnidilide	1	Accepted	194.13	0.826	0.475	4.1	-3.978	0.267	CCCC[C@@H]1OC(=O)[C@@H]2C=CCC[C@H]12
Columbianetin	1	Accepted	246.09	0.92	0.428	2.16	-2.658	0.045	CC(C)(O)[C@H]1CC2=C3OC(=O)C=CC3=CC=C2O1
D-Selinene	0	Accepted	204.19	0.35	0.013	4.834	-4.808	0.098	CC(C)C1=CC2=C(C)CCCC2(C)CC1
Di-N-propylamine	0	Accepted	101.12	0.047	0.006	1.463	-0.289	0.889	CCCNCCC
Dihydroisocarveol	0	Accepted	154.14	0.159	0.01	2.863	-2.263	0.812	C[C@@H]1CC[C@H](C[C@H]1O)C(C)=C
Dihydroneocarveol	0	Accepted	154.14	0.449	0.026	2.579	-2.285	0.973	CC1CCC(CC1O)C(C)=C
(E)-Butylidene phthalide	0	Accepted	188.08	0.466	0.958	3.587	-3.84	0.169	[H]\C(CCC)=C1\OC(=O)C2=CC=CC=C12
Flavonoids	0	Accepted	224.08	0.73	0.859	3.177	-4.32	0.257	O=C1CC(OC2=CC=CC=C12)C1=CC=CC=C1
Glucosidase	1	Accepted	43.04	0.117	0.23	-0.742	1.023	0.1516	C1CN1
Hex-cis-3-en-1-ol	0	Accepted	100.09	0.359	0.032	0.671	-1.296	0.4032	CC\C=C/CCO
Hex-trans-3-en-1-ol	0	Accepted	100.09	0.194	0.003	1.296	-1.247	0.4051	CC\C=C\CCO
Hypoxanthine	0	Accepted	136.04	0.035	0.165	-0.833	-2.093	0.167	OC1=NC=NC2=C1NC=N2
Indosterol	0	Accepted	412.37	0.037	0.027	6.899	-6.96	0.9925	CCC(\C=C\C(C)C1CCC2C3CCC4CC(O)CCC4(C)C3=CCC12C)C(C)C
Isobutylidene	0	Accepted	174.11	0.011	0.092	-0.98	-1.201	0.0971	CC(C)C(NC(N)=O)NC(N)=O
Isoimperatorin	3	Accepted	270.09	0.59	0.069	4.439	-4.885	0.8398	CC(C)=CCOC1=C2C=CC(=O)OC2=CC2=C1C=CO2
N-6-Isopent-2-enyl-adenosine	2	Accepted	335.16	0.047	0.038	0.537	-2.71	0.5429	[H][C@@]1(CO)O[C@]([H])(N2C=NC3=C(NCC=C(C)C)N=CN=C23)[C@@]([H])(O)[C@@]1([H])O
N-Hexylcyclohexadiene	0	Accepted	168.19	0.055	0.007	6.218	-6.261	0.9769	CCCCCCC1CCCCC1
N-Methylaniline	1	Accepted	107.07	0.442	0.511	1.824	-1.483	0.7323	CNC1=CC=CC=C1
N-Pentyl benzene	0	Accepted	148.13	0.212	0.01	4.505	-4.62	0.9577	CCCCCC1=CC=CC=C1
Nicotine	0	Accepted	162.12	0.242	0.012	0.967	0.79	0.2457	CN1CCC[C@H]1C1=CN=CC=C1
Nodakenetic	1	Accepted	246.09	0.875	0.059	2.245	-2.648	0.8737	[H][C@@]1(CC2=C(O1)C=C1OC(=O)C=CC1=C2)C(C)(C)O
p-Mentha-8(9)-en-1,2-diol	0	Accepted	170.13	0.323	0.022	1.596	-1.358	0.4175	CC(=C)C1CCC(C)(O)C(O)C1
p-Mentha-cis-1(7)-8-dien-2-ol	0	Accepted	152.12	0.894	0.023	2.016	-2.138	0.4897	CC(=C)C1CCC(=C)C(O)C1
p-Mentha-trans-1(7)-8-dien-2-ol	0	Accepted	152.12	0.894	0.023	2.016	-2.138	0.4897	CC(=C)C1CCC(=C)C(O)C1
Pentenylbenzene	0	Accepted	146.11	0.607	0.04	3.591	-3.698	0.9557	CCC\C=C\C1=CC=CC=C1
Phellopterin	3	Accepted	300.1	0.676	0.294	4.04	-4.62	0.728	COC1=C2C=CC(=O)OC2=C(OCC=C(C)C)C2=C1C=CO2
Pinocarvyl acetate	0	Accepted	194.13	0.107	0.003	2.483	-2.931	0.4888	CC(=O)OC1CC2CC(C1=C)C2(C)C
Sedanoic acid	0	Accepted	116.08	0.213	0.008	1.875	-1.245	0.7114	CCCCCC(O)=O
Sedanonic anhydride	1	Accepted	192.12	0.9	0.014	4.059	-3.139	0.9767	CCC\C=C1\OC(=O)C2=C1CCCC2
Senkyunolide N	1	Accepted	226.12	0.074	0.076	2.034	-2.511	0.9287	CCCCC1OC(=O)C2=C1CCC(O)C2O
Spinosterol	0	Accepted	412.37	0.015	0.002	7.492	-6.895	0.8884	[H]\C(=C(\[H])[C@@]([H])(C)[C@@]1([H])CC[C@@]2([H])C3=CC[C@@]4([H])C[C@@]([H])(O)CC[C@]4(C)[C@@]3([H])CC[C@]12C)[C@@]([H])(CC)C(C)C
Toluidine	5	Accepted	307.1	0.892	0.953	5.599	-7.517	1.0068	CC1=CC(=C(N\N=C2/C(=O)C=CC3=CC=CC=C23)C=C1)[N+]([O-])=O
trans-Carvyl acetate	0	Accepted	194.13	0.328	0.055	3.327	-2.716	0.7403	CC(=O)O[C@H]1C[C@@H](CC=C1C)C(C)=C
trans-p-Mentha-1(7),8-dien-2-ol	0	Accepted	152.12	0.957	0.091	2.192	-1.904	0.4099	[H][C@]1(O)C[C@]([H])(CCC1=C)C(C)=C
trans-p-Mentha-2,8-dien-1-ol	0	Accepted	152.12	0.814	0.008	2.352	-1.525	0.3699	[H][C@@]1(CC[C@](C)(O)C=C1)C(C)=C
Xanthoxotin	3	Accepted	271.08	0.362	0.704	2.192	-3.465	0.8729	COC1=CC2=C(C(O)=C1OC)C(=O)C1=CC=CC=C1N2
(Z)-Butylidenephthalide	0	Accepted	188.08	0.107	0.006	3.377	-3.934	0.9219	CCC\C=C1\OC(=O)C2=CC=CC=C12
15-Docosenoic acid	0	Accepted	338.32	0.059	0.004	8.712	-6.362	0.9917	CCCCCCC=CCCCCCCCCCCCCCC(O)=O
2,4-Methylene cholesterol	0	Accepted	410.35	0.263	0.014	6.548	-6.85	0.9606	CC(C)CCC[C@@H](C)C1CCC2C3CC=C4C(=C)[C@@H](O)C(=C)C[C@]4(C)C3CC[C@]12C
7-Hexadecenoic acid	0	Accepted	254.22	0.12	0.017	5.184	-3.383	0.9832	CCCCCCCC\C=C/CCCCCC(O)=O
9,10-Dihydroxystearic acid	0	Accepted	316.26	0.044	0.008	4.628	-3.302	0.9738	CCCCCCCCC(O)C(O)CCCCCCCC(O)=O
alpha-Amino-beta-hydroxybutyric acid	2	Accepted	119.06	0.052	0.014	-2.015	0.049	0.1076	CC(O)C(N)C(O)=O
alpha-Cephalin	0	Accepted	299.08	0.491	0.877	-1.94	0.125	0.0963	CC(=O)OCC(COP(O)(=O)OCCN)OC(C)=O
Arachin	2	Accepted	349.18	0.828	0.574	4.987	-5.111	0.9894	COC1=CC=C\C(=C2\NC3=CC=CC=C3C(=N2)N2CCCCC2C)C1=O
DL-Aminobutyric acid	0	Accepted	103.06	0.093	0.063	-2.582	-0.295	0.072	CCC(N)C(O)=O
Dihydroxystearic acid	1	Accepted	316.26	0.021	0.001	6.373	-4.102	0.9761	CCCCCCCCCCCCCCCCC(O)(O)C(O)=O
Docosenic acid	0	Accepted	338.32	0.072	0.004	8.869	-6.266	0.9925	[H]\C(CCCCCCCCCCCCCCCCCCC)=C(\[H])C(O)=O
Eicosanic acid	0	Accepted	312.3	0.041	0.005	8.389	-6.259	0.9913	CCCCCCCCCCCCCCCCCCCC(O)=O
Hexaconic acid	0	Accepted	116.08	0.213	0.008	1.875	-1.245	0.7114	CCCCCC(O)=O
Hexacosaenoic acid	0	Accepted	396.4	0.026	0.005	10.758	-6.91	0.9887	CCCCCCCCCCCCCCCCCCCCCCCCCC(O)=O
Hexadecenoic acid	0	Accepted	254.22	0.12	0.017	5.184	-3.383	0.9832	CCCCCC\C=C/CCCCCCCC(O)=O
Isochlorogenic acid	3	Accepted	354.1	0.059	0.026	-0.162	-1.198	0.6719	OC1CC(O)(CC(OC(=O)\C=C\C2=CC=C(O)C(O)=C2)C1O)C(O)=O
Malvalic acid	0	Accepted	280.24	0.108	0.004	6.229	-4.334	0.9708	CCCCCCCCC1=C(CCCCCCC(O)=O)C1
Nonadecanoic acid	0	Accepted	298.29	0.045	0.005	7.984	-6.079	0.9922	CCCCCCCCCCCCCCCCCCC(O)=O
Nonadecenoic acid	0	Accepted	296.27	0.094	0.005	7.7	-5.721	0.9888	CCCCCCCCCCCCCCCCC=CC(O)=O
Sarkosin	0	Accepted	89.05	0.093	0.021	-2.788	0.297	0.127	CNCC(O)=O
Sterculic acid	0	Accepted	294.26	0.094	0.004	6.66	-4.583	0.9699	CCCCCCCCC1=C(CCCCCCCC(O)=O)C1
Stizolamine	1	Accepted	197.09	0.1	0.029	-1.735	-1.721	0.1799	CN1C(CO)=CN=C(NC(N)=N)C1=O
trans-10-Octadecenoic acid	0	Accepted	282.26	0.044	0.002	6.83	-4.628	0.9994	CCCCCCC\C=C\CCCCCCCCC(O)=O
Trihydroxystearic acid	1	Accepted	332.26	0.018	0.003	5.536	-3.67	0.9765	CCCCCCCCCCCCCCCC(O)C(O)(O)C(O)=O
1,11-Tridecadiene	1	Accepted	180.19	0.07	0.007	5.947	-5.859	1.0026	C\C=C\CCCCCCCCC=C
alpha-Amyrin-acetate	0	Accepted	468.4	0.015	0.002	7.921	-7.292	0.9716	[H][C@@]12[C@@H](C)[C@H](C)CC[C@]1(C)CC[C@]1(C)C2=CCC2[C@@]3(C)CC[C@H](OC(C)=O)C(C)(C)C3CC[C@@]12C
Aplotaxene	1	Accepted	232.22	0.06	0.004	6.158	-6.002	1.0114	CC\C=C\C\C=C\C\C=C\CCCCCC=C
Arctic acid	4	Accepted	248	0.55	0.016	4.497	-3.964	1.0097	CC#CC1=CC=C(S1)C1=CC=C(S1)C(O)=O
Arctic acid B	6	Accepted	275.99	0.642	0.037	3.82	-3.969	1.0141	CC#CC1=CC=C(S1)C1=CC=C(S1)C(=O)C(O)=O
Arctic acid C	6	Accepted	278.01	0.416	0.66	3.318	-3.885	1.009	CC#CC1=CC=C(S1)C1=CC=C(S1)C(O)C(O)=O
Arctignan A	1	Accepted	554.22	0.12	0.079	2.667	-4.181	0.9503	COC1=CC(CC2COC(=O)C2CC2=CC=C(OC(CO)C(O)C3=CC=C(O)C(OC)=C3)C(OC)=C2)=CC=C1O
Arctignan B	1	Accepted	552.2	0.069	0.039	2.966	-4.523	0.9636	COC1=CC(CC2C(CC3=CC(C(CO)C(=O)C4=CC(OC)=C(O)C=C4)=C(O)C(OC)=C3)COC2=O)=CC=C1O
Arctignan C	1	Accepted	552.2	0.069	0.039	2.966	-4.523	0.9636	COC1=CC(CC2COC(=O)C2CC2=CC(C(CO)C(=O)C3=CC=C(O)C(OC)=C3)=C(O)C(OC)=C2)=CC=C1O
Arctignan D	1	Rejected	732.28	0.032	0.048	2.883	-3.605	0.8912	COC1=CC(CC2C(CC3=CC(C(CO)C(O)C4=CC=C(O)C(OC)=C4)=C(O)C(OC)=C3)COC2=O)=CC2=C1OC(C2CO)C1=CC=C(O)C(OC)=C1
Arctignan E	1	Rejected	732.28	0.032	0.048	2.883	-3.605	0.8912	COC1=CC(CC2COC(=O)C2CC2=CC(OC)=C(O)C(=C2)C(CO)C(O)C2=CC=C(O)C(OC)=C2)=CC2=C1OC(C2CO)C1=CC=C(O)C(OC)=C1
Arctinal	5	Accepted	232	0.866	0.625	4.488	-5.991	1.0093	CC#CC1=CC=C(S1)C1=CC=C(S1)C=O
Arctinol	4	Accepted	264.03	0.748	0.124	3.559	-3.754	0.9923	CC#CC1=CC=C(S1)C1=CC=C(S1)C(O)CO
Arctinol A	4	Accepted	234.02	0.743	0.152	4.101	-5.377	1.0029	CC#CC1=CC=C(S1)C1=CC=C(CO)S1
Arctinone	5	Accepted	246.02	0.853	0.451	4.346	-5.463	1.0141	CC#CC1=CC=C(S1)C1=CC=C(S1)C(C)=O
Arctinone A	5	Accepted	262.01	0.664	0.785	3.755	-4.43	0.9978	CC#CC1=CC=C(S1)C1=CC=C(S1)C(=O)CO
Arctinone A acetate	5	Accepted	304.02	0.801	0.844	4.024	-4.553	1.0028	CC#CC1=CC=C(S1)C1=CC=C(S1)C(=O)COC(C)=O
Atropine	0	Accepted	289.17	0.086	0.037	1.877	-2.033	0.2968	CN1C2CCC1CC(C2)OC(=O)C(CO)C1=CC=CC=C1
beta-Amyrin	0	Accepted	426.39	0.019	0.001	7.713	-6.841	0.9732	CC1(C)CC[C@]2(C)CC[C@]3(C)C(=CC[C@@H]4[C@@]5(C)CC[C@H](O)C(C)(C)[C@@H]5CC[C@@]34C)[C@@H]2C1
beta-Amyrin acetate	0	Accepted	468.4	0.019	0.016	8.115	-6.988	1.004	CC(=O)OC1CCC2(C)C(CCC3(C)C2CC=C2C4CC(C)(C)CCC4(C)CCC32C)C1(C)C
Clovene	0	Accepted	204.19	0.746	0.001	5.16	-3.961	0.898	CC1(C)C=C[C@@]23CCC[C@@](C)(CC[C@@H]12)C3
Dehydrocostus lactone	1	Accepted	230.13	0.663	0.036	2.639	-3.506	0.7805	C=C1CCC2C1C1OC(=O)C(=C)C1CCC2=C
Dehydrodihydrocostus lactone	0	Accepted	232.15	0.319	0.037	3.247	-3.568	0.5976	CC1C2CCC(=C)C3CCC(=C)C3C2OC1=O
Dehydrofukinone	1	Accepted	218.17	0.792	0.031	3.641	-4.683	0.9415	C[C@H]1CCCC2=CC(=O)C(C[C@]12C)=C(C)C
Germacranolide	0	Accepted	234.16	0.095	0.005	3.373	-4.409	0.8873	[H]\C1=C(C)/CC2OC(=O)C(C)C2C\C([H])=C(C)\CC1
1-Heptadecene	1	Accepted	238.27	0.058	0.011	8.463	-7.045	1.0009	CCCCCCCCCCCCCCCC=C
Hex-3-en-1-al	0	Accepted	100.09	0.277	0.024	1.594	-0.859	0.296	CCC=CCCO
Isolappaol A	1	Accepted	536.2	0.087	0.073	3.242	-3.566	0.9594	COC1=CC(CC2C(CC3=CC=C(O)C(OC)=C3)COC2=O)=CC2=C1OC(C2CO)C1=CC=C(O)C(OC)=C1
Lappaol B	1	Accepted	550.22	0.061	0.08	3.387	-4.085	0.9044	COC1=CC(CC2C(CC3=CC=C(OC)C(OC)=C3)COC2=O)=CC2=C1OC(C2CO)C1=CC(OC)=C(O)C=C1
Lappaol E	1	Accepted	554.22	0.12	0.079	2.667	-4.181	0.9503	COC1=CC(CC2C(CC3=CC=C(OC(CO)C(O)C4=CC=C(O)C(OC)=C4)C(OC)=C3)COC2=O)=CC=C1O
Lappaol H	1	Rejected	750.29	0.018	0.037	1.904	-3.932	0.8756	COC1=CC(=CC=C1O)C(O)C(CO)C1=CC(CC2COC(=O)C2CC2=CC(C(CO)C(O)C3=CC=C(O)C(OC)=C3)=C(O)C(OC)=C2)=CC(OC)=C1O
Lappaphen A	5	Accepted	478.13	0.743	0.384	5.791	-5.5	1.0081	CC#CC1=CC=C(S1)C1=CC=C(S1)C(=O)CC1(O)C2CCC(=C)C3CCC(=C)C3C2OC1=O
Methylarctate B	6	Accepted	290.01	0.882	0.727	4.123	-6.034	1.016	COC(=O)C(=O)C1=CC=C(S1)C1=CC=C(S1)C#CC
Neoarctin B	1	Rejected	742.3	0.028	0.046	5.61	-5.262	0.853	[H][C@]1(CC2=CC(OC)=C(C=C2)C2=C(OC)C=C(C[C@@]3([H])COC(=O)[C@]3([H])CC3=CC(OC)=C(O)C(OC)=C3)C=C2)COC(=O)[C@]1([H])CC1=CC(OC)=C(O)C(OC)=C1
Oct-2-en-1-al	2	Accepted	126.1	0.814	0.318	2.778	-2.317	0.7973	[H]C(=O)C([H])=C([H])C([H])([H])C([H])([H])C([H])([H])C([H])([H])C([H])([H])[H]
psi-Taraxasterol	0	Accepted	426.39	0.03	0.002	7.096	-6.499	0.9803	C[C@H]1C2C3CCC4[C@@]5(C)CC[C@H](O)C(C)(C)C5CC[C@@]4(C)[C@]3(C)CC[C@@]2(C)CC=C1C
Trideca-1,11-dien-3,5,7,9-tetrayn	4	Accepted	164.06	0.453	0.489	4.807	-4.909	1.0419	CC=CC#CC#CC#CC#CC=C
3-Benzylisothiocyanate	3	Accepted	149.03	0.101	0.256	3.163	-2.904	0.2573	S=C=NCC1=CC=CC=C1
Quercetin 3-O-(2-O-beta-D-xylopyranosyl-beta-D-galactopyranoside)	4	Rejected	596.14	0.051	0.855	-0.432	-2.698	0.8597	OC[C@H]1O[C@@H](O)[C@H](OC[C@H]2O[C@@H](OC3=C(OC4=C(C(O)=CC(O)=C4)C3=O)C3=CC(O)=C(O)C=C3)[C@H](O)[C@@H](O)[C@H]2O)[C@H]1O
Kaempferol 3-O-beta-D-galactopyranoside	1	Rejected	448.1	0.051	0.803	0.828	-3.986	0.9083	OC[C@H]1O[C@@H](OC2=C(OC3=C(C(O)=CC(O)=C3)C2=O)C2=CC=C(O)C=C2)[C@H](O)[C@@H](O)[C@H]1O
Bioside	0	Rejected	758.41	0.038	0.1	0.233	-3.197	0.4796	C[C@H]1C2C(CC3C4CCC5C[C@@H](O[C@@H]6O[C@H](CO)[C@H](O[C@@H]7O[C@H](CO)[C@@H](O)[C@H](O)[C@H]7O)[C@H](O)[C@H]6O)[C@H](O)C[C@]5(C)C4C[C@H](O)[C@]23C)O[C@]11CCCCO1
D-2-Butylisothiocyanate	3	Accepted	115.05	0.204	0.084	3.193	-2.09	0.1579	[H][C@@](C)(CC)N=C=S
Glucocochlearin	1	Accepted	375.07	0.082	0.022	-0.535	-0.529	0.6791	CC[C@H](C)C(S[C@@H]1O[C@H](CO)[C@@H](O)[C@H](O)[C@H]1O)=NOS(O)(=O)=O
Haematin	2	Rejected	560.24	0.472	0.139	6.298	-2.942	0.9519	O.[Fe++].CC1=C(C=C)C2=CC3=NC(=CC4=C(C)C(CCC(O)=O)=C([N-]4)C=C4N=C(C=C1[N-]2)C(C)=C4CCC(O)=O)C(C=C)=C3C
Hydroxycinnamic acid	2	Accepted	164.05	0.151	0.045	1.923	-1.363	0.8536	OC(=O)\C=C\C1=CC=C(O)C=C1
Isothiocyanates	6	Accepted	451.93	0.88	0.267	3.017	-0.853	0.9739	[Na+].[Na+].[O-]S(=O)(=O)C1=C(C=CC2=C(C=C(C=C2)N=C=S)S([O-])(=O)=O)C=CC(=C1)N=C=S
Kaempferol 3-O-beta-D-xylofuranoside	1	Accepted	418.09	0.066	0.787	1.405	-4.092	0.9188	OC[C@H]1O[C@@H](OC2=C(OC3=C(C(O)=CC(O)=C3)C2=O)C2=CC=C(O)C=C2)[C@H](O)[C@H]1O
Kaempferol 3-O-beta-D-xylofuranosyl-(1->2)-galactopyranoside	1	Rejected	580.14	0.052	0.821	-0.118	-3.184	0.8586	OC[C@H]1O[C@@H](O[C@@H]2[C@@H](O)[C@@H](O)[C@@H](CO)O[C@H]2OC2=C(OC3=C(C(O)=CC(O)=C3)C2=O)C2=CC=C(O)C=C2)[C@H](O)[C@H]1O
Sinapin	2	Accepted	310.16	0.036	0.006	-0.198	0.509	0.2531	COC1=CC(\C=C/C(=O)OCC[N+](C)(C)C)=CC(OC)=C1O
beta-Cadinol	0	Accepted	222.2	0.29	0.007	4.048	-3.749	0.828	[H][C@@]1(CC[C@](C)(O)C2([H])CCC(=C)CC12[H])C(C)C
Cadin-9-en-1-ol	0	Accepted	222.2	0.092	0.011	4.295	-4.985	0.9479	CC(C)C1CC=C(C)C2(O)CCC(C)CC12
cis-Dehydromatricaria ester	4	Accepted	172.05	0.574	0.736	3.06	-3.782	1.0154	COC(=O)\C=C\C#CC#CC#CC
gamma-Cadinol	0	Accepted	222.2	0.34	0.006	4.969	-4.293	0.9519	[H][C@@]1(CC[C@](C)(O)C2([H])CC=C(C)CC12[H])C(C)C
Muurolol	0	Accepted	222.2	0.199	0.013	4.347	-4.578	0.9581	[H][C@@]12C=C(C)CC[C@]1([H])[C@](C)(O)CC[C@H]2C(C)C
Psilostachyin	1	Accepted	280.13	0.726	0.024	0.889	-2.713	0.6843	CC1CCC2C(OC(=O)C2=C)C(C)(O)C11CCC(=O)O1
Psilostachyin C	1	Accepted	264.14	0.47	0.056	2.238	-3.932	0.8534	CC1CCC2C(OC(=O)C2=C)C2(C)OC(=O)CCC12
Tetradeca-4,6-diene-8,10,12-triyne-1-ol	4	Accepted	214.1	0.513	0.497	2.686	-3.528	1.0121	[H]\C(C#CC#CC#CC)=C(\[H])C1OC1CCCO
Trideca-1,3,5-trien-7,9,11-triyn	5	Accepted	166.08	0.392	0.501	3.908	-4.333	1.0164	CC#CC#CC#C\C=C\C=C\C=C
Vulgarol	2	Accepted	292.07	0.022	0.099	3.124	-4.088	1.0122	OC1=C(C2=CC=CC=C2)C(=O)C(O)=C(C2=CC=CC=C2)C1=O
Officinalisin II	1	Rejected	1052.54	0.017	0.062	-1.756	-0.852	0.3367	CC(CCC1(O)OC2CC3C4CCC5CC(CCC5(C)C4CCC3(C)C2C1C)OC1OC(CO)C(OC2OCC(O)C(O)C2O)C(O)C1OC1OC(CO)C(O)C(O)C1O)COC1OC(CO)C(O)C(O)C1O
1-(3-Aminopropyl)-pyrrolinium	0	Accepted	126.12	0.758	0.063	0.103	-0.319	0.1775	C1CC2NCCCN2C1
5-Dehydro-avenasterol	0	Accepted	414.39	0.017	0.005	7.042	-6.828	0.9999	C\C=C(\CC[C@@H](C)C1CCC2C3CCC4C[C@@H](O)CC[C@]4(C)C3CC[C@]12C)C(C)C
Apigenin 6-C-glucosyl-O-arabinoside	1	Rejected	564.15	0.091	0.766	-0.148	-2.423	0.872	OC[C@H]1O[C@@H](OC[C@H]2OC([C@H](O)[C@@H](O)[C@@H]2O)C2=C(O)C3=C(OC(=CC3=O)C3=CC=C(O)C=C3)C=C2O)[C@@H](O)[C@@H]1O
Apigenin 8-C-rhamnosyl-glucoside	1	Rejected	578.16	0.333	0.739	0.993	-3.702	0.8591	C[C@@H]1O[C@@H](OC[C@H]2O[C@@H](OC3=CC4=C(C(O)=C3)C(=O)C=C(O4)C3=CC=C(O)C=C3)[C@H](O)[C@@H](O)[C@@H]2O)[C@H](O)[C@H](O)[C@H]1O
Avenin	1	Accepted	211.06	0.028	0.122	-0.026	-0.251	0.1291	COP(=O)(NC(=O)OC(C)C)OC
beta-Hydroxy-beta-methylglutaric acid	0	Accepted	162.05	0.028	0.016	-0.66	0.429	0.1761	CC(O)(CC(O)=O)CC(O)=O
Butenyl isothiocyanate	3	Accepted	113.03	0.748	0.517	2.605	-1.541	0.1636	[H]\C(CC)=C(\[H])N=C=S
Caffeic acid ester	3	Accepted	284.1	0.182	0.594	3.395	-3.402	0.9806	[H]\C(=C(\[H])C1=CC(O)=C(O)C=C1)C(=O)OCCC1=CC=CC=C1
Cholest-7-en-3beta-ol	0	Accepted	386.35	0.043	0.005	7.313	-7.215	0.9896	CC(C)CCC[C@@H](C)C1CCC2C3=CCC4C[C@@H](O)CC[C@]4(C)C3CC[C@]12C
Dec-trans-2-en-1-al	2	Accepted	154.14	0.653	0.569	3.352	-3.045	0.8557	CCCCCCC\C=C\C=O
delta-5-Avenasterol	0	Accepted	412.37	0.029	0.005	6.735	-6.868	0.9972	C\C=C(/C(C)C)CC[C@@H](C)C1CCC2C3CC=C4C[C@@H](O)CC[C@]4(C)C3CC[C@]12C
Diaminopropane	6	Accepted	124.06	0.466	0.943	-0.486	-0.927	0.2682	NC1=CC(N)=C(O)C=C1
Ergothioneine	2	Accepted	230.1	0.581	0.001	-2.507	0.273	0.1215	C[N+](C)(C)C(CC1=CNC(=S)N1)C(O)=O
Fur-2-aldehyde	2	Accepted	96.02	0.844	0.723	0.815	-0.525	0.7437	O=CC1=CC=CO1
Guanine	0	Accepted	151.05	0.504	0.42	-1.823	-2.705	0.1406	NC1=NC(=O)C2=C(N1)N=CN2
Isopropyl tartaric acid	3	Accepted	192.06	0.007	0.028	-1.001	-0.139	0.2237	[H][C@](O)(C(O)=O)[C@@]([H])(O)C(=O)OC(C)C
Lichenin	0	Accepted	162.05	0.036	0.512	-1.292	-0.057	0.1278	CO[C@@H]1OC=C(O)[C@H](O)[C@H]1O
Luteolin 6-C-glucosyl-O-arabinoside	2	Rejected	580.14	0.075	0.822	-0.168	-2.646	0.8598	OC[C@H]1O[C@@H](OC[C@H]2O[C@H]([C@H](O)[C@@H](O)[C@@H]2O)C2=C(O)C3=C(OC(=CC3=O)C3=CC(O)=C(O)C=C3)C=C2O)[C@@H](O)[C@@H]1O
Melatonin	2	Accepted	232.12	0.096	0.084	1.346	-1.995	0.3221	COC1=CC=C2NC=C(CCNC(C)=O)C2=C1
Methoxymalic acid	1	Accepted	146.02	0.064	0.017	-0.155	-0.479	0.208	[H]\C(C(O)=O)=C(/OC)C(O)=O
Nicotianamine	0	Accepted	303.14	0.028	0.017	-5.225	-1.693	0.0971	N[C@@H](CCN[C@@H](CCN1CC[C@H]1C(O)=O)C(O)=O)C(O)=O
Oct-trans-2-en-1-ol	0	Accepted	128.12	0.109	0.004	2.372	-2.662	0.6451	[H]\C(CO)=C(\[H])CCCCC
Orgothionenine	2	Accepted	229.09	0.771	0.001	-2.537	-0.118	0.128	C[N+](C)(C)C(CC1=CNC(S)=N1)C([O-])=O
Phaeophorbide	2	Rejected	622.28	0.627	0.188	6.674	-4.424	0.9903	CCC1=C2NC(C=C3N=C(C(CCC(=O)OC)C3C)C3=C4N=C(C=C5NC(=C2)C(C=O)=C5CC)C(C)=C4C(=O)C3C(=O)OC)=C1C
Stigmastanediol	0	Accepted	432.4	0.015	0.026	6.675	-6.328	0.727	CCC(CCC(C)C1CCC2C3CCC4(O)CC(O)CCC4(C)C3CCC12C)C(C)C
trans-Non-2-en-1-al	0	Accepted	142.14	0.085	0.004	2.854	-3.042	0.993	CCCCCC\C=C\CO
Isorhamnetin 3-O-(beta-D-glucopyranosyl-(1->6)-beta-D-glucopyranoside)	1	Rejected	640.16	0.054	0.817	-0.547	-3.149	0.086	COC1=C(O)C=CC(=C1)C1=C(O[C@@H]2O[C@H](CO[C@@H]3O[C@H](CO)[C@@H](O)[C@H](O)[C@H]3O)[C@@H](O)[C@H](O)[C@H]2O)C(=O)C2=C(O1)C=C(O)C=C2O
D-Ribulose	1	Accepted	150.05	0.008	0.061	-2.039	-0.108	0.416	OCC(O)C(O)C(=O)CO
Hydantoin	0	Accepted	100.03	0.269	0.025	-0.892	-1.166	0.114	O=C1CNC(=O)N1
Protoporphyrin	3	Rejected	562.26	0.853	0.468	6.71	-3.382	0.022	CC1=C(CCC(O)=O)/C2=C/C3=N/C(=C\C4=C(C)C(C=C)=C(N4)/C=C4\N=C(\C=C\1/N\2)C(C=C)=C4C)/C(C)=C3CCC(O)=O
Sedoheptulose	0	Accepted	210.07	0.013	0.085	-2.139	-0.097	0.321	OC[C@H]1OC(O)(CO)[C@@H](O)[C@H](O)[C@@H]1O
(-)-Bornesitol	0	Accepted	194.08	0.017	0.077	-1.771	-0.089	0.284	CO[C@H]1[C@H](O)[C@@H](O)[C@H](O)[C@@H](O)[C@H]1O
7-Acetyllycopsamine	1	Accepted	341.18	0.969	0.024	1.099	-1.677	0.465	CC(C)[C@](O)([C@H](C)O)C(=O)OCC1=CCN2CC[C@@H](OC(C)=O)[C@@H]12
Acetyllycopsamine	1	Accepted	341.18	0.97	0.025	1.462	-1.642	0.642	CC(C)C(O)(C(C)O)C(=O)OCC1=CCN2CCC(OC(C)=O)C12
Amabiline	0	Accepted	283.18	0.964	0.118	1.515	-1.491	0.915	[H][C@@]12CCCN1CC=C2COC(=O)[C@](O)(C(C)C)[C@H](C)O
Cynaustine	0	Accepted	283.18	0.966	0.02	1.731	-1.852	0.85	[Cl-].CC(C)[C@@](O)([C@H](C)O)C(=O)OCC1=CC[NH+]2CCC[C@H]12
Erucic acid	0	Accepted	338.32	0.059	0.004	8.712	-6.362	0.028	CCCCCCCCC=CCCCCCCCCCCCC(O)=O
Intermedine	0	Accepted	299.17	0.965	0.028	0.644	-1.464	0.455	[H][C@@]12[C@H](O)CCN1CC=C2COC(=O)[C@](O)(C(C)C)[C@@H](C)O
Octadeca-6,9,12,15-tetraenoic acid	0	Accepted	276.21	0.089	0.585	5.774	-4.677	0.384	CCC=CCC=CCC=CCC=CCCCCC(O)=O
Octadecenoic acid	0	Accepted	282.26	0.103	0.005	7.298	-5.439	0.119	[H]\C(CCCCCCCCCCCCCCC)=C(/[H])C([O-])=O
Resin	0	Accepted	60.03	0.117	0.071	-1.365	0.74	0.974	C=O.NC(N)=O
Steridonic acid	0	Accepted	276.21	0.854	0.959	1.633	-2.955	0.001	CC\C=C/C\C=C/C\C=C/C\C=C/CCCCC(O)=O
Supinidine	0	Accepted	139.1	0.92	0.121	0.354	-0.088	0.639	[H][C@@]12CCCN1CC=C2CO
Supinine	0	Accepted	283.18	0.955	0.099	1.371	-1.49	0.892	CC(C)[C@](O)([C@@H](C)O)C(=O)OCC1=CCN2CCC[C@@H]12
24-Methylene-25-methylcholesterol	0	Accepted	412.37	0.025	0.002	7.206	-6.925	0.58	C[C@H](CCC(=C)C(C)(C)C)[C@H]1CCC2C3CC=C4C[C@@H](O)CC[C@]4(C)C3CC[C@]12C
Crotonyl isothiocyanate	4	Accepted	127.01	0.909	0.912	1.848	-1.001	0.917	C\C=C\C(=O)N=C=S
Glycolipids	1	Accepted	493.34	0.136	0.005	1.702	-0.329	0.056	CCCCCCCCCCCCC\C=C\[C@@H](O)[C@H](COP(=O)(O)OCC[N+](C)(C)C)NC=O
1-Methylthiopentan-3-one	1	Accepted	132.06	0.22	0.044	1.126	-1.374	0.995	CCC(=O)CCSC
2(or 3)-methylindole	2	Accepted	131.07	0.151	0.243	2.691	-2.407	0.712	CC1=CNC2=C1C=CC=C2
2,5-Dimethyl-6-vinylpyrazine	1	Accepted	134.08	0.783	0.034	1.449	-0.463	0.968	CC1=CN=C(C)C(C=C)=N1
2-Acetyl-4-methylthiazole	2	Accepted	141.02	0.121	0.217	1.209	-1.113	0.8	CC(=O)C1=NC(C)=CS1
2-Methyl-6-vinylpyrazine	1	Accepted	120.07	0.337	0.006	1.088	0.327	0.348	CC1=NC(C=C)=CN=C1
2-Phenethyl isothiocyanate	3	Accepted	163.05	0.14	0.281	3.27	-3.162	0.362	S=C=NCCC1=CC=CC=C1
3-Methylbutanonitrile	1	Accepted	83.07	0.922	0.032	1.03	-1.532	0.987	CC(C)CC#N
4-(Methylthio)-butanonitrile	1	Accepted	115.05	0.871	0.023	0.915	-1.966	0.995	CSCCCC#N
5-(Methylthio)-pentanonitrile	1	Accepted	129.06	0.863	0.023	1.244	-2.316	0.996	CSCCCCC#N
Deca-2-one	1	Accepted	156.15	0.094	0.006	3.374	-3.04	0.994	CCCCCCCCC(C)=O
di-(2-Methylpropyl)-phthalate	0	Accepted	278.15	0.096	0.009	4.066	-4.465	0.039	CC(C)COC(=O)C1=CC=CC=C1C(=O)OCC(C)C
Dioctyl phthalate	0	Accepted	390.28	0.237	0.004	7.988	-7.075	0.019	CCCCCCCCOC(=O)C1=CC=CC=C1C(=O)OCCCCCCCC
Linalol oxide	2	Accepted	170.13	0.232	0.033	1.678	-1.202	0.978	CC(O)(CCC1OC1(C)C)C=C
Thiophen-2-carboxyaldehyde	2	Accepted	112	0.072	0.626	1.198	-1.317	0.516	O=CC1=CC=CS1
Thiophen-3-carboxyaldehyde	2	Accepted	112	0.023	0.068	1.106	-1.219	0.592	O=CC1=CSC=C1
Anteisoheptacosan-1-ol	0	Accepted	396.43	0.018	0.007	11.352	-7.372	0.005	CCCCCCCCCCCCCCCCCCCCCCCCC(C)CO
Anteisomontanyl alcohol	0	Accepted	410.45	0.016	0.007	11.743	-7.438	0.003	CCCCCCCCCCCCCCCCCCCCCCCCCC(C)CO
1-Heptacosanol	0	Accepted	396.43	0.019	0.007	11.49	-7.401	0.004	CCCCCCCCCCCCCCCCCCCCCCCCCCCO
1-Isohexacosanol	0	Accepted	382.42	0.02	0.006	10.905	-7.331	0.009	CC(C)CCCCCCCCCCCCCCCCCCCCCCCO
1-Pentacosanol	0	Accepted	368.4	0.022	0.007	10.708	-7.267	0.007	CCCCCCCCCCCCCCCCCCCCCCCCCO
2-Propenyl glucosinolate	2	Accepted	359.03	0.147	0.022	-0.985	-0.306	0.062	[H][C@]1(CO)O[C@@]([H])(SC(CC=C)=NOS(O)(=O)=O)[C@]([H])(O)[C@@]([H])(O)[C@]1([H])O
1-Methoxyindole-3-carbaldehyde	3	Accepted	175.06	0.916	0.75	2.113	-2.901	0.978	CON1C=C(C=O)C2=CC=CC=C12
1-O-Sinapoyl-beta-D-glucose	2	Accepted	386.12	0.056	0.152	-0.061	-1.248	0.544	COC1=CC(\C=C\C(=O)O[C@@H]2O[C@H](CO)[C@@H](O)[C@H](O)[C@H]2O)=CC(OC)=C1O
alpha-Lipoic acid	0	Accepted	206.04	0.82	0.023	2.143	-3.007	0.892	OC(=O)CCCCC1CCSS1
Hex-cis-3-enol acetate	0	Accepted	142.1	0.274	0.005	2.18	-2.168	0.993	CC\C=C\CCOC(C)=O
3-Pentanone	1	Accepted	86.07	0.039	0.017	0.766	0.06	0.991	CCC(=O)CC
beta-Amryin	0	Accepted	426.39	0.017	0.018	7.815	-6.142	0.749	CC1(C)CCC2(C)CCC3(C)C(=CCC4C5(C)CCC(O)C(C)(C)C5CCC34C)C2C1
ent-Epigallocatechin 3-gallate	2	Rejected	458.08	0.037	0.209	2.043	-3.83	0.006	OC1=CC2=C(C[C@H](OC(=O)C3=CC(O)=C(O)C(O)=C3)[C@@H](O2)C2=CC(O)=C(O)C(O)=C2)C(O)=C1
1,2,3-Trimethoxy-5-ethylbenzene	0	Accepted	181.09	0.908	0.078	1.77	-2.369	0.989	CO[C]1C(OC)=CC(=C)C=C1OC
1,3-Diacetylbenzene	0	Accepted	162.07	0.04	0.027	1.375	-1.947	0.738	CC(=O)C1=CC(=CC=C1)C(C)=O
1,4-Diacetylbenzene	0	Accepted	162.07	0.138	0.042	1.423	-2.275	0.475	CC(=O)C1=CC=C(C=C1)C(C)=O
2,4-Dimethylpropiophenone	0	Accepted	162.1	0.558	0.16	3.369	-3.734	0.975	CCC(=O)C1=C(C)C=C(C)C=C1
2,4-Dimethylquinoline	1	Accepted	157.09	0.815	0.907	2.754	-2.212	0.964	CC1=CC(C)=C2C=CC=CC2=N1
2,5-Dimethylpyridine	0	Accepted	107.07	0.531	0.037	1.55	0.316	0.95	CC1=CC=C(C)N=C1
2,6,6-Trimethylcyclohex-2-en-1,4-dione	1	Accepted	152.08	0.852	0.439	1.462	-1.836	0.183	CC1=CC(=O)CC(C)(C)C1=O
2,6,6-Trimethylcyclohex-2-en-1-one	1	Accepted	138.1	0.564	0.008	2.561	-2.462	0.315	CC1=CCCC(C)(C)C1=O
2,6-Diemthyl-pyrazine	0	Accepted	108.07	0.343	0.007	0.593	0.785	0.604	CC1=CN=CC(C)=N1
2,6-Diemthyl-pyridine	0	Accepted	107.07	0.679	0.078	1.344	0.027	0.94	CC1=CC=CC(C)=N1
2,6-Dimethylquinoline	1	Accepted	157.09	0.797	0.844	2.818	-2.266	0.969	CC1=CC2=CC=C(C)N=C2C=C1
2-Ethylpyridine	0	Accepted	107.07	0.189	0.04	1.528	0.145	0.908	CCC1=CC=CC=N1
2-Methyl-6-ethylpyridine	0	Accepted	121.09	0.305	0.036	1.883	-0.607	0.967	CCC1=CC=CC(C)=N1
2-Methylpentan-3-ol	0	Accepted	102.1	0.059	0.013	1.515	-0.679	0.939	CCC(O)C(C)C
2-Methylpyridine	0	Accepted	93.06	0.479	0.105	0.965	0.823	0.826	CC1=NC=CC=C1
2-Methylquinoline	3	Accepted	175.05	0.773	0.867	2.338	-3.017	0.857	CC1=CC(=S)C2=CC=CC=C2N1
2-O-(beta-L-Arabinopyranosyl)-myoinositol	0	Accepted	312.11	0.022	0.104	-2.462	-0.141	0.251	O[C@H]1CO[C@H](O[C@H]2[C@@H](O)[C@H](O)[C@@H](O)[C@H](O)[C@H]2O)[C@H](O)[C@H]1O
2-Phenylpyridine	0	Accepted	155.07	0.512	0.743	2.621	-2.54	0.724	C1=CC=C(C=C1)C1=CC=CC=N1
(24S)-24-Ethylbrassinone	0	Accepted	478.37	0.043	0.024	3.809	-4.628	0.117	[H][C@@]12CC(=O)[C@@]3([H])C[C@H](O)[C@H](O)C[C@]3(C)C1CC[C@]1(C)C(CCC21)C(C)[C@@H](O)[C@H](O)[C@@H](CC)C(C)C
24-Ethylbrassinone	0	Accepted	478.37	0.033	0.022	3.816	-4.68	0.107	[H][C@@]12CC(=O)[C@@]3([H])C[C@H](O)[C@H](O)C[C@]3(C)C1CC[C@]1(C)C(CCC21)C(C)[C@@H](O)[C@H](O)C(CC)C(C)C
24-Methyl-lathosterol	0	Accepted	400.37	0.092	0.006	7.409	-7.2	0.695	[H][C@@]12CC=C3C4CCC([C@H](C)CCC(C)C(C)C)[C@@]4(C)CCC3[C@@]1(C)CC[C@H](O)C2
24-Methylene-dammarenol	0	Accepted	440.4	0.011	0.003	7.025	-6.412	0.047	[H][C@]12CC[C@]3([H])[C@@]4(C)CC[C@H](O)C(C)(C)[C@]4([H])CC[C@@]3(C)[C@]1(C)CC[C@@H]2C(=C)CCC(=C)C(C)C
28-Norbrassinolide	0	Accepted	466.33	0.243	0.035	3.81	-4.293	0.074	[H][C@@]1(CC[C@@]2([H])[C@]3([H])COC(=O)[C@@]4([H])C[C@H](O)[C@H](O)C[C@]4(C)[C@@]3([H])CC[C@]12C)[C@H](C)[C@@H](O)[C@H](O)CC(C)C
(3S),7-Dimethylocta-1,5,7-trien-3-ol	2	Accepted	152.12	0.479	0.142	1.796	-1.679	0.989	[H]OC(C)(C\C=C\C(C)=C)C=C
(3S),7-Dimethylocta-1,5-dien-3,7-diol	1	Accepted	170.13	0.164	0.006	1.413	-0.593	0.984	CC(C)(O)C=CCC(C)(O)C=C
3-Methoxypyridine	0	Accepted	109.05	0.497	0.02	0.896	0.695	0.839	COC1=CC=CN=C1
3-Methylpentan-2-ol	0	Accepted	102.1	0.057	0.013	1.691	-0.811	0.94	CCC(C)C(C)O
3-Methylpyridine	0	Accepted	93.06	0.372	0.015	1.125	0.82	0.861	CC1=CC=CN=C1
3-Phenylpyridine	0	Accepted	155.07	0.335	0.424	2.625	-2.225	0.81	C1=CC=C(C=C1)C1=CN=CC=C1
4,8-Dimethylquinoline	1	Accepted	157.09	0.613	0.817	3.058	-2.831	0.897	CC1=CC=CC2=C(C)C=CN=C12
4-Ethyl-7,11-dimethyldodeca-trans-2-trans-6-1-o-trien-1-al	2	Accepted	234.2	0.174	0.015	5.118	-4.973	0.866	CCC(C\C=C(/C)CCC=C(C)C)\C=C\C=O
4-Gallocatechol	2	Accepted	306.07	0.047	0.433	0.756	-2.975	0.017	O[C@@H]1CC2=C(O)C=C(O)C=C2O[C@H]1C1=CC(O)=C(O)C(O)=C1
4-Methyl-hex-5-en-4-olide	1	Accepted	126.07	0.637	0.026	1.205	-1.251	0.997	CC1(CCC(=O)O1)C=C
4-Methylpyridine	0	Accepted	93.06	0.362	0.068	1.189	0.723	0.788	CC1=CC=NC=C1
4-Vinylpyridine	2	Accepted	105.06	0.275	0.071	1.654	-0.316	0.494	C=CC1=CC=NC=C1
5-Methyl-2-ethyl-pyrazine	0	Accepted	122.08	0.384	0.008	1.113	0.688	0.846	CCC1=CN=C(C)C=N1
5-Methylcytosine	0	Accepted	125.06	0.201	0.041	-1.317	-1.691	0.235	CC1=C(N)NC(=O)N=C1
6,10-Dimethylundecan-2-one	1	Accepted	198.2	0.056	0.004	4.333	-4.629	0.903	CC(C)CCCC(C)CCCC(C)=O
6-Keto-28-homobrassinolide	0	Accepted	478.37	0.133	0.02	4.285	-4.436	0.091	[H][C@@]12CC[C@H]([C@H](C)[C@@H](O)[C@H](O)[C@H](CC)C(C)C)[C@@]1(C)CC[C@@]1([H])[C@@]2([H])CC(=O)[C@@]2([H])C[C@H](O)[C@H](O)C[C@]12C
6-Methyl-2-ethyl-pyrazine	0	Accepted	122.08	0.284	0.005	1.11	0.526	0.687	CCC1=NC(C)=CN=C1
alpha-Dihydroergosterol	0	Accepted	398.35	0.01	0.005	6.785	-6.752	0.029	CC(C)[C@@H](C)\C=C\C(C)[C@H]1CC[C@@]2([H])C3=C(CC[C@]12C)[C@@]1(C)CC[C@H](O)CC1CC3
alpha-Spinasterol gentiobioside	0	Rejected	736.48	0.035	0.053	4.455	-4.374	0.001	CC[C@@H](C(C)C)\C=C\[C@@H](C)[C@H]1CCC2C3=CC[C@@]4([H])C[C@H](CC[C@]4(C)C3CC[C@]12C)O[C@@H]1O[C@H](CO[C@@H]2O[C@H](CO)[C@@H](O)[C@H](O)[C@H]2O)[C@@H](O)[C@H](O)[C@H]1O
R1-Barrigenol	0	Rejected	506.36	0.016	0.02	3.235	-3.619	0.923	CC1(C)CC2C3=CCC4C5(C)CCC(O)C(C)(C)C5CCC4(C)C3(C)C(O)C(O)C2(CO)C(O)C1O
Benzoxazole	1	Accepted	119.04	0.861	0.325	1.454	-1.228	0.823	O1C=NC2=CC=CC=C12
Benzyl ethyl ketone	1	Accepted	148.09	0.058	0.059	1.929	-2.07	0.817	CCC(=O)CC1=CC=CC=C1
Cyclohexanones	1	Accepted	223.1	0.064	0.096	2.064	-1.321	0.973	Cl.CCNC1(CCCCC1=O)C1=CC=CS1
Degalloyl theasinensin F	3	Rejected	594.14	0.013	0.312	1.54	-4.629	0.006	O[C@@H]1CC2=C(O[C@@H]1C1=CC(O)=C(O)C=C1C1=C(C=C(O)C(O)=C1O)[C@H]1OC3=C(C[C@H]1O)C(O)=CC(O)=C3)C=C(O)C=C2O
Epicatechin-(4beta->8)-epigallocatechin 3'-gallate	2	Rejected	746.15	0.02	0.144	2.947	-4.991	0	O[C@H]1[C@H](OC2=C([C@@H]1C1=C(O)C=C(O)C3=C1O[C@@H]([C@@H](C3)OC(=O)C1=CC(O)=C(O)C(O)=C1)C1=CC(O)=C(O)C(O)=C1)C(O)=CC(O)=C2)C1=CC=C(O)C(O)=C1
Epigallocatechin-(4beta->8)-epicatechin 3,3'-digallate	2	Rejected	898.16	0.013	0.086	3.367	-4.776	0	OC1=CC2=C([C@@H]([C@@H](OC(=O)C3=CC(O)=C(O)C(O)=C3)[C@H](O2)C2=CC(O)=C(O)C(O)=C2)C2=C(O)C=C(O)C3=C2O[C@@H]([C@@H](C3)OC(=O)C2=CC(O)=C(O)C(O)=C2)C2=CC=C(O)C(O)=C2)C(O)=C1
Ether	0	Accepted	74.07	0.658	0.018	1.003	-0.174	0.972	CCOCC
Euphol	0	Accepted	426.39	0.168	0.001	8.306	-6.131	0.055	[H][C@]1(CC[C@]2(C)C3=C(CC[C@@]12C)[C@@]1(C)CC[C@H](O)C(C)(C)[C@]1([H])CC3)[C@H](C)CCC=C(C)C
Galegine	2	Accepted	127.11	0.083	0.01	0.962	-1.173	0.574	OS(O)(=O)=O.CC(C)=CCN=C(N)N
Hex-cis-3-en-1-al	1	Accepted	98.07	0.692	0.647	1.104	-1.271	0.969	[H]\C(CC)=C(\[H])CC=O
Hex-cis-3-en-1-ol acetate	0	Accepted	100.09	0.359	0.032	0.671	-1.296	0.997	CC\C=C/CCO
Hex-cis-3-enyl hex-trans-2-enoate	1	Accepted	196.15	0.501	0.014	3.326	-3.557	0.986	CCC\C=C\C(=O)OCC\C=C/CC
Hex-cis-3-enyl propionate	0	Accepted	156.12	0.633	0.054	2.013	-2.841	0.993	CC\C=C/CCOC(=O)CC
Hex-trans-2-en-1-al	2	Accepted	98.07	0.859	0.859	1.06	-1.138	0.998	[H]\C(CCC)=C(\[H])C=O
Hex-trans-2-en-1-ol	0	Accepted	100.09	0.147	0.004	1.36	-1.661	0.995	CCC\C=C\CO
Hex-trans-2-enyl acetate	0	Accepted	142.1	0.786	0.423	1.599	-2.297	0.998	[H]\C(CCC)=C(/[H])COC(C)=O
Hex-trans-2-enyl butyrate	0	Accepted	170.13	0.216	0.004	3.211	-3.666	0.966	[H]\C(CC)=C(\[H])CCOC(=O)CCC
Hex-trans-2-enyl formate	2	Accepted	128.08	0.655	0.026	2.14	-2.323	0.999	CCC\C=C\COC=O
Hex-trans-2-enyl hexanoate	0	Accepted	198.16	0.423	0.009	4.325	-4.218	0.567	CCCCCC(=O)OCC=CCCC
Hex-trans-2-enyl propionate	0	Accepted	156.12	0.316	0.004	2.859	-2.925	0.975	CCC\C=C\COC(=O)CC
Hex-trans-3-enyl 2-methyl-butyrate	0	Accepted	184.15	0.499	0.163	2.883	-3.07	0.994	[H]\C(CCC)=C(/[H])COC(=O)C(C)CC
Hex-trans-3-enyl butyrate	0	Accepted	170.13	0.586	0.023	3.363	-3.169	0.612	CCCC(=O)OCCC=CCC
Hex-trans-3-enyl propionate	0	Accepted	156.12	0.291	0.003	2.749	-2.919	0.962	[H]\C(CC)=C(\[H])CCOC(=O)CC
Hexa-trans-2-cis-4-dien-1-al	3	Accepted	96.06	0.772	0.805	1.32	-1.034	0.996	[H]\C(C)=C(/[H])\C(\[H])=C(/[H])C=O
2-Hexanol	0	Accepted	102.1	0.101	0.012	1.766	-0.913	0.96	CCCCC(C)O
Hexenoic acid	0	Accepted	114.07	0.176	0.01	1.819	-0.735	0.844	CCCC=CC(O)=O
Kaempferol 3-O-rhamnodiglucoside	1	Rejected	756.21	0.084	0.71	-0.707	-2.929	0.126	C[C@@H]1O[C@@H](OC[C@H]2O[C@@H](OC[C@H]3O[C@@H](OC4=C(OC5=C(C(O)=CC(O)=C5)C4=O)C4=CC=C(O)C=C4)[C@H](O)[C@@H](O)[C@@H]3O)[C@H](O)[C@@H](O)[C@@H]2O)[C@H](O)[C@H](O)[C@H]1O
Kaempferol 3-rhamno-glucoside	1	Rejected	594.16	0.092	0.805	0.2	-3.844	0.051	C[C@@H]1O[C@@H](OC[C@H]2O[C@@H](OC3=C(OC4=C(C(O)=CC(O)=C4)C3=O)C3=CC=C(O)C=C3)[C@H](O)[C@@H](O)[C@@H]2O)[C@H](O)[C@H](O)[C@H]1O
Kaempferol 3-triglucoside	1	Rejected	772.21	0.073	0.437	-1.557	-2.244	0.2	OC[C@H]1O[C@@H](OC[C@H]2O[C@@H](OC[C@H]3O[C@@H](OC4=C(OC5=C(C(O)=CC(O)=C5)C4=O)C4=CC=C(O)C=C4)[C@H](O)[C@@H](O)[C@@H]3O)[C@H](O)[C@@H](O)[C@@H]2O)[C@H](O)[C@@H](O)[C@@H]1O
Loliolide	1	Accepted	196.11	0.699	0.1	1.937	-2.261	0.987	C[C@@]12C[C@@H](O)CC(C)(C)C1=CC(=O)O2
N-1-Dotriacontanol	0	Accepted	466.51	0.013	0.008	13.446	-7.729	0.001	CCCCCCCCCCCCCCCCCCCCCCCCCCCCCCCCO
N-Ethylaniline	1	Accepted	121.09	0.227	0.051	2.285	-1.695	0.678	CCNC1=CC=CC=C1
N-Ethylpropionamide	0	Accepted	101.08	0.022	0.012	0.198	0.809	0.996	CCN=C(O)CC
Nona-trans-2-cis-6-dien-1-al	2	Accepted	138.1	0.885	0.283	2.788	-2.233	0.992	CCC=CCCC=CC=O
Nona-trans-2-trans-4-dien-1-al	2	Accepted	138.1	0.642	0.895	2.124	-1.987	0.988	[H]\C(CCCC)=C(\[H])/C(/[H])=C(\[H])C=O
O-Quinone	2	Accepted	108.02	0.739	0.67	0.521	-1.487	0.503	O=C1C=CC=CC1=O
o-Toluidine	1	Accepted	107.07	0.748	0.804	1.397	-0.876	0.826	CC1=CC=CC=C1N
o-Xylenol	1	Accepted	122.07	0.574	0.071	2.441	-1.435	0.756	CC1=C(C)C(O)=CC=C1
Oct-trans-2-enoic acid	0	Accepted	142.1	0.219	0.009	2.721	-1.957	0.858	CCCCC\C=C\C(O)=O
Octa-trans-3-cis-5-dien-2-one	2	Accepted	124.09	0.774	0.093	1.143	-1.257	0.969	[H]\C(CC)=C(/[H])\C(\[H])=C(/[H])C(C)=O
p-Ethylacetophenone	0	Accepted	148.09	0.354	0.032	2.532	-2.732	0.42	CCC1=CC=C(C=C1)C(C)=O
p-Ethylpropiophenone	0	Accepted	162.1	0.219	0.067	3.208	-3.644	0.814	CCC(=O)C1=CC=C(CC)C=C1
Pent-cis-2-en-1-ol	0	Accepted	86.07	0.679	0.172	0.596	-0.738	0.997	CC\C=C/CO
Phenols	1	Accepted	199.05	0.762	0.286	4.384	-5.205	0.7	N1C2=CC=CC=C2SC2=CC=CC=C12
Pyrrol-2-methylketone	2	Accepted	109.05	0.254	0.038	0.952	-0.759	0.942	CC(=O)C1=CC=CN1
Quercetin 3-O-rhamnodiglucoside	2	Rejected	772.21	0.066	0.753	-0.946	-2.883	0.099	C[C@@H]1O[C@@H](OC[C@H]2O[C@@H](OC[C@H]3O[C@@H](OC4=C(OC5=C(C(O)=CC(O)=C5)C4=O)C4=CC(O)=C(O)C=C4)[C@H](O)[C@@H](O)[C@@H]3O)[C@H](O)[C@@H](O)[C@@H]2O)[C@H](O)[C@H](O)[C@H]1O
Spinasterone	0	Accepted	410.35	0.029	0.013	6.765	-6.805	0.968	[H]\C(C(C)C1CCC2C3=CCC4CC(=O)CCC4(C)C3CCC12C)=C(\[H])C(CC)C(C)C
Theaflavin monogallate	2	Rejected	716.14	0.01	0.194	2.366	-5.291	0.002	[H][C@@]1(O)CC2=C(O)C=C(O)C=C2O[C@]1([H])C1=CC(O)=C(O)C2=C1C=C(C=C(OC(=O)C1=CC(O)=C(O)C(O)=C1)C2=O)[C@@]1([H])OC2=CC(O)=CC(O)=C2C[C@@]1([H])O
Undeca-trans-2-en-1-al	2	Accepted	168.15	0.571	0.498	3.84	-3.346	0.994	CCCCCCCC\C=C\C=O
Glucocapangulin	2	Accepted	432.11	0.2	0.889	1.425	-4.303	0.044	[H][C@]1(CO)O[C@@]([H])(OC2=CC(O)=CC3=C2C(=O)C2=C(C=C(C)C=C2O)C3=O)[C@]([H])(O)[C@@]([H])(O)[C@]1([H])O
Quercetin 7-O-beta-D-glucopyranoside-beta-L-rhamnopyranoside	2	Rejected	610.15	0.13	0.852	0.128	-2.964	0.04	C[C@@H]1O[C@H](OC2=CC3=C(C(O)=C2)C(=O)C(O)=C(O3)C2=CC(O)=C(O)C=C2)[C@H](O)[C@H](O)[C@H]1O[C@@H]1O[C@H](CO)[C@@H](O)[C@H](O)[C@H]1O
Rutinose	0	Accepted	326.12	0.039	0.452	-2.073	-0.516	0.203	C[C@@H]1O[C@@H](OC[C@H]2O[C@@H](O)[C@H](O)[C@@H](O)[C@@H]2O)[C@H](O)[C@H](O)[C@H]1O
1-O-Caffeoyl-beta-D-glucose	3	Accepted	342.1	0.098	0.494	-0.322	-0.743	0.41	OC[C@H]1O[C@@H](OC(=O)\C=C\C2=CC(O)=C(O)C=C2)[C@H](O)[C@@H](O)[C@@H]1O
13-cis-Capsanthin	3	Rejected	584.42	0.734	0.13	5.754	-5.626	0.027	O[C@H]1CC(C)(C)[C@@](C)(C1)C(=O)\C=C\C(\C)=C\C=C\C(\C)=C\C=C\C=C(\C)/C=C/C=C(\C)/C=C/C1=C(C)C[C@@H](O)CC1(C)C
2-Methylpentan-2-ol	0	Accepted	102.1	0.254	0.006	1.42	-0.653	0.989	CCCC(C)(C)O
(24R)-Ethyl-lophenol	0	Accepted	428.4	0.077	0.003	8.299	-7.161	0.459	[H][C@@]12CC=C3C4CC[C@H]([C@H](C)CC[C@H](CC)C(C)C)[C@@]4(C)CCC3[C@@]1(C)CC[C@H](O)[C@H]2C
3beta-Lanostenol	0	Accepted	428.4	0.011	0.002	7.944	-6.916	0.038	[H][C@@](C)(CCCC(C)C)[C@@]1([H])CC[C@@]2(C)C3=C(CC[C@]12C)[C@@]1(C)CC[C@H](O)C(C)(C)[C@]1([H])CC3
24-Methyl-lanost-9(11)-en-3-beta-ol	0	Accepted	440.4	0.026	0.001	8.739	-6.977	0.088	[H][C@@]12CCC3C(=CC[C@]4(C)[C@H](CC[C@@]34C)[C@H](C)CCC(C)=C(C)C)[C@@]1(C)CC[C@H](O)C2(C)C
24-Methyllophenol	0	Accepted	414.39	0.065	0.004	7.985	-7.221	0.501	[H][C@@]12CC=C3C4CC[C@H]([C@H](C)CCC(C)C(C)C)[C@@]4(C)CCC3[C@@]1(C)CC[C@H](O)[C@H]2C
3,6-Epoxide-5-hydroxy-5,6-dihydrozeaxanthin	1	Rejected	584.42	0.877	0.062	5.258	-4.849	0.037	O[C@@H]1CC(C)=C(\C=C\C(\C)=C\C=C\C(\C)=C\C=C\C=C(/C)\C=C\C=C(/C)\C=C\[C@]23O[C@@H](CC2(C)C)C[C@@]3(C)O)C(C)(C)C1
3-Methylpentan-3-ol	0	Accepted	102.1	0.289	0.008	1.147	-0.538	0.976	CCC(C)(O)CC
31-nor-Lanost-8-en-3beta-ol	0	Accepted	398.35	0.028	0.002	7.785	-6.677	0.018	[H][C@@]12CC[C@H]([C@H](C)CCC=C(C)C)[C@@]1(C)CCC1=C2CC[C@@]2([H])C(C)[C@@H](O)CC[C@]12C
31-nor-Lanost-9(11)-en-3beta-ol	0	Accepted	398.35	0.154	0.006	8.224	-6.895	0.223	[H][C@@]12CC[C@H]([C@H](C)CCC=C(C)C)[C@@]1(C)CC=C1C2CC[C@@]2([H])C(C)[C@@H](O)CC[C@]12C
31-nor-Lanosterol	0	Accepted	412.37	0.068	0.006	7.602	-6.694	0.038	[H][C@@]12CCC3=C(CC[C@]4(C)[C@H](CC[C@@]34C)[C@H](C)CCC=C(C)C)[C@@]1(C)CC[C@H](O)C2C
31-Norcycloartanol	0	Accepted	414.39	0.185	0.007	7.948	-6.943	0.101	[H][C@@]12CC[C@]3([H])[C@@]4(C[C@]14CC[C@H](O)C2C)CC[C@]1(C)[C@H](CC[C@@]31C)[C@H](C)CCCC(C)C
4alpha,14alpha,24-Trimethyl-cholesta-8(24)-dien-3beta-ol	0	Accepted	426.39	0.034	0.007	7.44	-6.834	0.122	C[C@H](CCC(C)=C(C)C)C1CC[C@@]2(C)C3=C(CC[C@]12C)[C@@]1(C)CC[C@H](O)[C@@H](C)C1CC3
4alpha,24-Dimethylcholesta-7,24-dien-3beta-ol	0	Accepted	412.37	0.033	0.004	7.726	-7.085	0.784	C[C@H](CCC(C)=C(C)C)C1CCC2C3=CCC4[C@H](C)[C@@H](O)CC[C@]4(C)C3CC[C@]12C
4alpha-Methyl-24-ethyl-cholesta-7,24-dien-3beta-ol	0	Accepted	426.39	0.041	0.004	7.69	-7.056	0.681	CCC(CC[C@@H](C)C1CCC2C3=CCC4[C@H](C)[C@@H](O)CC[C@]4(C)C3CC[C@]12C)=C(C)C
4alpha-Methyl-5alpha-cholest-8(14)-en-3beta-ol	0	Accepted	400.37	0.036	0.012	7.256	-7.053	0.414	CC(C)CCC[C@@H](C)C1CCC2=C3CCC4[C@H](C)[C@@H](O)CC[C@]4(C)C3CC[C@]12C
4-Methylheptadecane	0	Accepted	254.3	0.03	0.006	8.925	-7.217	0.121	CCCCCCCCCCCCCC(C)CCC
4-Methylhexadecane	0	Accepted	240.28	0.032	0.006	8.513	-7.137	0.155	CCCCCCCCCCCCC(C)CCC
4-Methylpentadecane	0	Accepted	226.27	0.035	0.006	8.1	-7.057	0.194	CCCCCCCCCCCC(C)CCC
4-Methyltetradecane	0	Accepted	212.25	0.038	0.006	7.677	-6.977	0.246	CCCCCCCCCCC(C)CCC
4-Methyltridecane	0	Accepted	198.23	0.041	0.006	7.245	-6.848	0.307	CCCCCCCCCC(C)CCC
5alpha-Cholest-8(14)-en-3beta-ol	0	Accepted	386.35	0.07	0.008	7.053	-6.937	0.399	[H][C@@]12CCC3=C4CCC([C@H](C)CCCC(C)C)[C@@]4(C)CCC3[C@@]1(C)CC[C@H](O)C2
5-Hydroxycapsanthin-3,6-epoxide	3	Accepted	600.42	0.886	0.239	4.453	-4.952	0.207	O[C@H]1CC(C)(C)[C@@](C)(C1)C(=O)\C=C\C(\C)=C\C=C\C(\C)=C\C=C\C=C(/C)\C=C\C=C(/C)\C=C\[C@]12O[C@]([H])(CC1(C)C)C[C@@]2(C)O
5-Hydroxycapsanthin-5,6-epoxide	4	Accepted	602.4	0.89	0.156	3.97	-4.919	0.847	O[C@H]1CC(C)(C)[C@@](C)(C1)C(=O)\C=C\C(\C)=C\C=C\C(\C)=C\C=C\C=C(/C)\C=C\C=C(/C)\C=C\C12OC1(O)C[C@@H](O)CC2(C)C
5-Hydroxycapsanthin	3	Accepted	586.4	0.693	0.047	4.917	-5.402	0.859	O[C@H]1CC(C)(C)[C@@](C)(C1)C(=O)\C=C\C(\C)=C\C=C\C(\C)=C\C=C\C=C(/C)\C=C\C=C(/C)\C=C\C1=C(O)C[C@@H](O)CC1(C)C
9-cis-Capsanthin	3	Rejected	584.42	0.76	0.143	5.774	-5.613	0.031	O[C@H]1CC(C)(C)[C@@](C)(C1)C(=O)\C=C\C(\C)=C\C=C\C(\C)=C\C=C\C=C(/C)\C=C\C=C(\C)/C=C/C1=C(C)C[C@@H](O)CC1(C)C
Capsicoside E	2	Rejected	1434.65	0.06	0.035	-2.124	-2.306	0.398	[H][C@]12C[C@@]3([H])[C@]4([H])CC[C@@]5([H])C[C@@H](O[C@@H]6O[C@H](CO)[C@H](O[C@@H]7O[C@H](CO)[C@@H](O)[C@H](O[C@@H]8O[C@H](CO)[C@@H](O)[C@H](O)[C@H]8O)[C@H]7O[C@@H]7O[C@H](CO)[C@@H](O)[C@H](O[C@@H]8O[C@H](CO)[C@@H](O)[C@H](O)[C@H]8O)[C@H]7O)[C@H](O)[C@H]6O)[C@H](O)C[C@]5(C)[C@@]4([H])CC[C@]3(C)[C@@]1([H])[C@H](C)C(CCC(=C)CO[C@@H]1O[C@H](CO)[C@@H](O)[C@H](O)[C@H]1O)(OC)O2
Carnaubic acid	0	Accepted	368.37	0.03	0.005	9.98	-6.754	0.007	CCCCCCCCCCCCCCCCCCCCCCCC(O)=O
cis-Cryptoxanthin	1	Rejected	552.43	0.039	0.146	10.181	-7.58	0.002	CC(C=CC=C(C)C=CC1=C(C)CCCC1(C)C)=CC=CC=C(C)C=CC=C(C)C=CC1=C(C)CC(O)CC1(C)C
Citrullin	0	Accepted	175.1	0.019	0.063	-3.609	-1.378	0.754	NC(CCCNC(O)=N)C(O)=O
Cyclopentanol	0	Accepted	86.07	0.371	0.014	0.653	-0.186	0.879	OC1CCCC1
epsilon-Carotene	1	Rejected	536.44	0.03	0.03	7.698	-4.472	0	C\C(\C=C\C=C(/C)\C=C\C1C(C)=CCCC1(C)C)=C/C=C/C=C(\C)/C=C/C=C(\C)/C=C/C1C(C)=CCCC1(C)C
Galactosamine	0	Accepted	179.08	0.015	0.515	-2.157	-0.122	0.218	N[C@H]1C(O)O[C@H](CO)[C@H](O)[C@@H]1O
Isohexyl isocaproate	0	Accepted	200.18	0.207	0.005	4.332	-4.738	0.429	CC(C)CCCOC(=O)CCC(C)C
Latoxanthin	2	Accepted	618.43	0.882	0.083	3.584	-4.409	0.8	O[C@@H]1C[C@@]2(C)O[C@@]2(\C=C\C(\C)=C\C=C\C(\C)=C\C=C\C=C(/C)\C=C\C=C(/C)\C=C\[C@@]2(O)C(C)(C)C[C@H](O)C[C@@]2(C)O)C(C)(C)C1
Heptadecanoic acid	0	Accepted	270.26	0.058	0.005	7.154	-5.591	0.042	CCCCCCCCCCCCCCCCC(O)=O
Obtusifoliol	0	Accepted	426.39	0.132	0.012	7.275	-6.63	0.053	CC(C)C(=C)CC[C@@H](C)[C@H]1CC[C@@]2(C)C3=C(CC[C@]12C)[C@@]1(C)CC[C@H](O)[C@@H](C)[C@@H]1CC3
p-Aminobenzaldehyde	2	Accepted	121.05	0.162	0.704	0.62	-1.508	0.981	NC1=CC=C(C=O)C=C1
Phosphatidylglycerol	0	Accepted	172.01	0.054	0.043	-2.192	0.477	0.353	CCC.CCO.OCC(O)COP(O)(O)=O
Phosphodiesterase	3	Accepted	289.11	0.826	0.856	2.48	-4.144	0.635	CCOC(=O)C1=C(C)N(N=C1C)C1=CC(=CC=C1)[N+]([O-])=O
Vanillic acid 4-beta-D-glucoside	0	Accepted	330.1	0.026	0.066	-0.308	-1.383	0.254	[H][C@]1(CO)O[C@@]([H])(OC2=C(OC)C=C(C=C2)C(O)=O)[C@]([H])(O)[C@@]([H])(O)[C@]1([H])O
Vanilloyl glucose	1	Accepted	330.1	0.031	0.157	-0.36	-1.39	0.526	[H][C@]1(CO)O[C@@]([H])(OC(=O)C2=CC(OC)=C(O)C=C2)[C@]([H])(O)[C@@]([H])(O)[C@]1([H])O
Vanillyl octanamide	1	Accepted	279.18	0.07	0.029	3.813	-3.53	0.795	CCCCCCCCN=C(O)C1=CC(OC)=C(O)C=C1
2,6-Dimethylocta-cis-2,7-diene-1,6-diol	1	Accepted	170.13	0.024	0.01	0.771	-0.979	0.998	[H]OC\C(C)=C/CCC(C)(O[H])C=C
6,7-Epoxylinalool	2	Accepted	170.13	0.232	0.033	1.678	-1.202	0.978	CC(O)(CCC1OC1(C)C)C=C
2-Butenoic acid methyl ester	1	Accepted	100.05	0.428	0.037	1.095	-0.836	1	[H]\C(C)=C(\[H])C(=O)OC
Carpasemine	3	Accepted	166.06	0.172	0.182	1.018	-1.423	0.848	NC(=S)NCC1=CC=CC=C1
Cotinine	0	Accepted	176.09	0.186	0.018	0.078	-0.465	0.685	CN1C(CCC1=O)C1=CN=CC=C1
Methylcyclohexane	0	Accepted	98.11	0.196	0.02	3.822	-3.83	0.985	CC1CCCCC1
Methylgeranate	0	Accepted	182.13	0.478	0.011	3.549	-2.921	0.753	CC(C)=CCC\C(C)=C(/C)C([O-])=O
N,N-Dimethylformamide	1	Accepted	73.05	0.029	0.016	-1.007	1.025	0.506	CN(C)C=O
N-Docosane	0	Accepted	310.36	0.023	0.008	10.82	-7.548	0.021	CCCCCCCCCCCCCCCCCCCCCC
N-Dodecane	0	Accepted	170.2	0.049	0.007	6.66	-6.515	0.429	CCCCCCCCCCCC
N-Eicosane	0	Accepted	282.33	0.027	0.007	10.033	-7.402	0.037	CCCCCCCCCCCCCCCCCCCC
N-Heneicosane	0	Accepted	296.34	0.025	0.008	10.427	-7.476	0.029	CCCCCCCCCCCCCCCCCCCCC
N-Heptadecane	0	Accepted	240.28	0.033	0.007	8.824	-7.165	0.085	CCCCCCCCCCCCCCCCC
N-Pentacosane	0	Accepted	352.41	0.019	0.008	12.001	-7.766	0.008	CCCCCCCCCCCCCCCCCCCCCCCCC
N-Tetradecane	0	Accepted	198.23	0.042	0.007	7.565	-6.923	0.208	CCCCCCCCCCCCCC
N-Triacontane	0	Accepted	422.49	0.013	0.009	13.966	-8.096	0.002	CCCCCCCCCCCCCCCCCCCCCCCCCCCCCC
(Z)-3-Hexenylbenzoate	0	Accepted	204.12	0.137	0.004	3.856	-4.619	0.089	[H]\C(CC)=C(\[H])CCOC(=O)C1=CC=CC=C1
(Z,Z)-1,8,11-Heptadecatriene	1	Accepted	234.23	0.334	0.265	5.533	-3.458	0.651	CCCCC\C=C/C\C=C/CCCCCC=C
(Z,Z)-1,3,11-Tridecatriene-5,7,9-triyne	5	Accepted	166.08	0.249	0.459	4.572	-4.597	0.001	C\C=C/C#CC#CC#C\C=C/C=C
(Z,Z,Z)-1,8,11,14-Heptadecatetraene	1	Accepted	232.22	0.753	0.837	4.062	-3.229	0.248	CC\C=C/C\C=C/C\C=C/CCCCCC=C
1-Hexadecene	1	Accepted	224.25	0.064	0.011	8.054	-6.965	0.317	CCCCCCCCCCCCCCC=C
2-Hydroxyarctiin	0	Rejected	550.21	0.147	0.106	0.844	-3.448	0.148	COC1=CC=C(CC2COC(=O)C2(O)CC2=CC=C(O[C@@H]3O[C@H](CO)[C@@H](O)[C@H](O)[C@H]3O)C(OC)=C2)C=C1OC
3E,11E-Trideca-1,3,11-triene-5,7,9-triyne	5	Accepted	166.08	0.4	0.573	4.107	-4.421	0.001	C\C=C\C#CC#CC#C\C=C\C=C
3E,5E,11E-Trideca-1,3,5,11-tetraene-7,9-diyne	5	Accepted	168.09	0.526	0.664	3.337	-3.912	0.002	C\C=C\C#CC#C\C=C\C=C\C=C
3E,5Z,11E-Trideca-1,3,5,11-tetraene-7,9-diyne	5	Accepted	168.09	0.396	0.606	3.702	-4.043	0.002	C\C=C\C#CC#C\C=C/C=C/C=C
3E-Trideca-1,3-diene-5,7,9,11-tetrayne	5	Accepted	164.06	0.293	0.437	4.529	-4.955	0.001	CC#CC#CC#CC#C\C=C\C=C
3Z,11E-Trideca-1,3,11-triene-5,7,9-triyne	5	Accepted	166.08	0.274	0.467	4.415	-4.589	0.001	C\C=C\C#CC#CC#C\C=C/C=C
Cyclosativene	0	Accepted	204.19	0.041	0.007	4.802	-5.429	0.368	CC(C)[C@H]1CC[C@]2(C)[C@H]3C[C@@H]4[C@H](C13)[C@]24C
Deca-4,6-diyn-1-ol	3	Accepted	150.1	0.74	0.449	2.577	-2.493	0.026	CCCC#CC#CCCCO
Ethyl benzene	0	Accepted	106.08	0.411	0.022	3.059	-2.94	0.872	CCC1=CC=CC=C1
Tetradecene	1	Accepted	196.22	0.078	0.012	7.197	-6.741	0.723	CCCCCCCCCCCCC=C
1-p-Menthene-6-ol	0	Accepted	154.14	0.255	0.008	2.725	-2.144	0.938	CC(C)C1CC=C(C)C(O)C1
1-p-Menthene-8,9-diol	0	Accepted	170.13	0.833	0.006	2.112	-1.471	0.996	CC1=CCC(CC1)C(C)(O)CO
2,8-p-Menthadien-6-ol	0	Accepted	152.12	0.273	0.03	2.378	-1.993	0.994	CC1C=CC(CC1O)C(C)=C
8-cis-Menthene	0	Accepted	138.14	0.235	0.016	4.464	-4.753	0.994	C[C@H]1CC[C@H](CC1)C(C)=C
beta-Fenchene	0	Accepted	136.13	0.355	0.01	3.918	-4.526	0.988	CC1(C)CC2CC1CC2=C
cis-2-Carveol	0	Accepted	152.12	0.107	0.013	2.478	-1.396	0.348	CC(=C)[C@@H]1CC=C(C)[C@H](O)C1
cis-Limonene epoxide	1	Accepted	152.12	0.675	0.032	2.775	-2.835	0.976	CC(=C)C1CCC2(C)OC2C1
D-Perillaldehyde	2	Accepted	150.1	0.825	0.156	2.518	-2.27	0.965	[H][C@]1(CCC(C=O)=CC1)C(C)=C
gamma-Elemene	1	Accepted	204.19	0.754	0.004	5.126	-4.417	0.082	CC(C)=C1CC[C@@](C)(C=C)[C@@H](C1)C(C)=C
Hexadecenic acid	0	Accepted	254.22	0.127	0.005	6.483	-4.729	0.269	CCCCCCCCCCCCC\C=C\C(O)=O
Isodihydrocarveol	0	Accepted	154.14	0.449	0.026	2.579	-2.285	0.973	CC1CCC(CC1O)C(C)=C
Neodihydrocarveol	0	Accepted	154.14	0.389	0.026	2.948	-2.072	0.922	C[C@@H]1CC[C@H](C[C@@H]1O)C(C)=C
Neoisodihydrocarveol	0	Accepted	154.14	0.436	0.031	2.588	-2.187	0.886	C[C@H]1CC[C@H](C[C@H]1O)C(C)=C
Quercetin 3-O-caffeyl-glucoside	3	Rejected	626.13	0.113	0.815	2.188	-4.536	0.008	O[C@@H]1[C@@H](COC(=O)\C=C\C2=CC=C(O)C(O)=C2)O[C@@H](OC2=C(OC3=C(C(O)=CC(O)=C3)C2=O)C2=CC(O)=C(O)C=C2)[C@H](O)[C@H]1O
trans-1-Carveol	0	Accepted	152.12	0.618	0.015	2.577	-1.675	0.649	CC(=C)[C@H]1CC=C(C)[C@H](O)C1
trans-Caryophyllene oxide	1	Accepted	220.18	0.112	0.055	4.474	-5.153	0.745	CC12CCC3C(CC3(C)C)C(=C)CCC1O2
trans-Limonene epoxide	1	Accepted	152.12	0.675	0.032	2.775	-2.835	0.976	CC(=C)C1CCC2(C)OC2C1
2-Methylbutylbutyrate	0	Accepted	158.13	0.348	0.01	3.274	-2.798	0.968	CCCC(=O)OCC(C)CC
3-Methylbutyl angelate	1	Accepted	170.13	0.146	0.009	3.08	-2.699	0.265	[H]\C(C)=C(/C)C(=O)OCCC(C)C
3-Methylidene-4-oxopentyl angelate	2	Accepted	196.11	0.728	0.701	1.085	-1.47	0.305	C\C=C(\C)C(=O)OCCC(=C)C(C)=O
3-Methylpentyl angelate	1	Accepted	184.15	0.128	0.005	3.583	-3.232	0.264	[H]\C(C)=C(/C)C(=O)OCCC(C)CC
5	1	Accepted	540.38	0.014	0.004	4.342	-4.855	0.047	CCCC1=CC=C(OC1=O)C(C)C(O)C(\C)=C\C\C=C(/C)C\C(C)=C\C(\C)=C\CC(O)C(C)C(O)C(\C)=C\C
Anthemol	0	Accepted	152.12	0.733	0.122	1.313	-0.826	0.951	CC(C)C1=CC=C(CO)CC1
Apigenin 7-glucoside-(2'',3'')-diacetate	2	Rejected	516.13	0.077	0.422	2.324	-4.254	0.032	CC(=O)O[C@H]1[C@H](O)[C@@H](CO)O[C@@H](OC2=CC3=C(C(O)=C2)C(=O)C=C(O3)C2=CC=C(O)C=C2)[C@@H]1OC(C)=O
Azulene	0	Accepted	128.06	0.763	0.726	3.386	-4.131	0.469	C1=CC2=CC=CC=CC2=C1
beta-Copaene	0	Accepted	204.19	0.575	0.017	4.952	-4.876	0.707	[H][C@@]12C3C(=C)CC[C@]1([H])[C@]3(C)CC[C@H]2C(C)C
beta-Cubebene	0	Accepted	204.19	0.05	0.012	4.47	-5.109	0.726	CC(C)[C@@H]1CC[C@@H](C)[C@@]23CCC(=C)[C@@H]2[C@@H]13
Butyl angelate	1	Accepted	156.12	0.131	0.009	2.703	-2.311	0.438	CCCCOC(=O)C(\C)=C\C
Cyclododecane	0	Accepted	168.19	0.075	0.027	6.477	-6.437	0.515	C1CCCCCCCCCCC1
D-3-Methyl pentanol	0	Accepted	102.1	0.254	0.007	1.75	-1.169	0.981	CCC(C)CCO
4-Deoxy-2,3-dihydromycosinol	3	Accepted	200.08	0.682	0.814	2.472	-3.032	0.039	CC#CC#CC=C1OC2(CCCO2)C=C1
Isobutyl-2-methylbutyrate	0	Accepted	158.13	0.109	0.017	2.969	-2.194	0.98	CCC(C)C(=O)OCC(C)C
Methacrylic acid	1	Accepted	86.04	0.089	0.014	0.832	0.208	0.376	CC(=C)C(O)=O
Pinene	0	Accepted	136.13	0.056	0.002	4.125	-4.662	0.896	CC1=CCC2CC1C2(C)C
Polyacetylene	0	Accepted	26.02	0.619	0.274	1.089	-1.633	0.998	C#C
Propyl angelate	1	Accepted	142.1	0.105	0.016	2.208	-1.944	0.536	CCCOC(=O)C(\C)=C/C
19-Monoacetyl cincassiol A	0	Accepted	410.19	0.917	0.058	0.918	-3.273	0.716	CC(COC(C)=O)C1=C[C@@]2(O)[C@@](O)(C1)[C@@]1(C)CC(=O)OC22[C@H](O)[C@@H](C)CCC12O
3,5,7-Trimethylepicatechin	2	Accepted	332.13	0.27	0.387	2.815	-3.439	0.05	CO[C@@H]1CC2=C(O[C@@H]1C1=CC=C(O)C(O)=C1)C=C(OC)C=C2OC
Ethyl guaiacol	0	Accepted	152.08	0.73	0.044	2.026	-2.229	0.431	CCOC1=CC=CC=C1OC
Ketones	1	Accepted	184.18	0.038	0.011	3.991	-3.616	0.989	CC(C)CCCC(=O)CCC(C)C
OPC	1	Accepted	447.15	0.363	0.06	5.123	-5.181	0.941	ClC1=CC=CC(N2CCN(CCCCOC3=CC4=C(CCC(=O)N4)C=C3)CC2)=C1Cl
Salicyaldehyde	4	Accepted	212.09	0.562	0.595	3.619	-3.083	0.759	O=C1C=CC=C\C1=C/NNC1=CC=CC=C1
trans-2-Methoxycinnamaldehyde	2	Accepted	162.07	0.881	0.745	1.848	-2.871	0.982	COC1=CC=CC=C1\C=C\C=O
trans-2-Methoxycinnamic acid	1	Accepted	178.06	0.394	0.046	2.07	-3.009	0.406	[H]\C(=C(\[H])C1=CC=CC=C1OC)C(O)=O
(Z)-Ocimenol	2	Accepted	154.14	0.862	0.08	2.658	-2.117	0.973	[H]OC(C)(C)CC\C=C(\C)C=C
(Z,E)-alpha-Farnesene	2	Accepted	204.19	0.267	0.059	5.855	-5.723	0.757	CC(C)=CCC\C(C)=C\C\C=C(\C)C=C
cis-Linalol-oxide	2	Accepted	170.13	0.232	0.033	1.678	-1.202	0.978	CC(O)(CCC1OC1(C)C)C=C
Dihydrofumigatin	3	Accepted	170.06	0.079	0.069	0.577	-0.66	0.067	COC1=C(O)C(O)=C(C)C=C1O
Proanthocyanidins	1	Rejected	592.16	0.024	0.288	2.781	-4.674	0.003	[H][C@@]1(O)CC2=C(OC1([H])C1=CC(O)=C(OC)C(O)=C1)C(=C(O)C=C2O)[C@@]1([H])C2=C(O)C=C(O)C=C2O[C@]([H])(C2=CC=C(O)C=C2)[C@]1([H])O
Sesquiterpenes	1	Accepted	246.13	0.767	0.153	2.414	-3.604	0.554	C[C@@H]1[C@@H]2CC[C@]3(C)C=CC(=O)C(C)=C3[C@@H]2OC1=O
(+)-Valine	0	Accepted	117.08	0.051	0.023	-2.211	-0.306	0.855	CC(C)[C@H](N)C(O)=O
24beta-Ethyl-25(27)-dehydrolophenol	0	Accepted	426.39	0.104	0.003	8.104	-7.063	0.419	[H][C@@]12CC=C3C4CC[C@H]([C@H](C)CC[C@H](CC)C(C)=C)[C@@]4(C)CCC3[C@@]1(C)CC[C@H](O)[C@H]2C
24beta-Ethyllophenol	0	Accepted	428.4	0.043	0.003	8.414	-7.263	0.326	[H][C@@]12CC=C3C4CC[C@H]([C@H](C)CC[C@@H](CC)C(C)C)[C@@]4(C)CCC3[C@@]1(C)CC[C@H](O)[C@H]2C
25(27)-Dehydrochondrillasterol	0	Accepted	410.35	0.051	0.004	7.249	-6.922	0.455	[H][C@@]12CC=C3C4CC[C@H]([C@H](C)\C=C\[C@H](CC)C(C)=C)[C@@]4(C)CCC3[C@@]1(C)CC[C@H](O)C2
25(27)-Dehydroporiferasterol	0	Accepted	410.35	0.042	0.009	6.684	-6.87	0.434	CC[C@@H](\C=C\[C@@H](C)C1CCC2C3CC=C4C[C@@H](O)CC[C@]4(C)C3CC[C@]12C)C(C)=C
6-Methyl-hept-5-en-2-one	1	Accepted	126.1	0.359	0.005	2.067	-1.868	0.997	CC(C)=CCCC(C)=O
Codisterol	0	Accepted	398.35	0.312	0.005	7.482	-6.416	0.294	[H][C@](C)(CC[C@@]([H])(C)[C@@]1([H])CC[C@@]2([H])[C@]3([H])CC=C4C[C@@]([H])(O)CC[C@]4(C)[C@@]3([H])CC[C@]12C)C(C)=C
L-(-)-Phenylalanine	0	Accepted	165.08	0.05	0.015	-1.507	-1.627	0.524	N[C@@H](CC1=CC=CC=C1)C(O)=O
Lupinic acid	0	Accepted	183.13	0.198	0.008	-1.206	-1.304	0.846	OC(=O)C1CCCN2CCCCC12
Oxypeucedanin hydrate	3	Accepted	304.09	0.691	0.029	1.971	-3.137	0.02	CC(C)(O)[C@H](O)COC1=C2C=COC2=CC2=C1C=CC(=O)O2
Undecane	0	Accepted	156.19	0.053	0.008	6.169	-6.168	0.627	CCCCCCCCCCC
Xanthyletin	1	Accepted	228.08	0.902	0.017	3.265	-4.01	0.057	CC1(C)OC2=C(C=C1)C=C1C=CC(=O)OC1=C2
Vitexin 2''-xyloside	1	Rejected	564.15	0.074	0.811	-0.112	-2.681	0.065	OC[C@H]1O[C@@H](O[C@@H]2[C@@H](O)[C@H](O)[C@@H](CO)OC2C2=C(O)C=C(O)C3=C2OC(=CC3=O)C2=CC=C(O)C=C2)[C@H](O)[C@H]1O
4-(3-Methyl-2-butenoxy)-acetophenone	0	Accepted	204.12	0.6	0.169	3.334	-3.282	0.1	CC(C)=CCOC1=CC=C(C=C1)C(C)=O
Apigenin 7-(6''-O-alpha-rhamnosyl-beta-glucoside)	1	Rejected	578.16	0.312	0.747	0.906	-4.261	0.075	C[C@@H]1O[C@H](OC[C@H]2O[C@@H](OC3=CC4=C(C(O)=C3)C(=O)C=C(O4)C3=CC=C(O)C=C3)[C@H](O)[C@@H](O)[C@@H]2O)[C@H](O)[C@H](O)[C@H]1O
beta-Bergamotene	0	Accepted	204.19	0.053	0.006	5.496	-5.551	0.146	CC(C)=CCCC1(C)[C@H]2C[C@@H]1C(=C)CC2
Braylin	1	Accepted	258.09	0.909	0.1	2.977	-4.073	0.071	COC1=CC2=C(OC(=O)C=C2)C2=C1OC(C)(C)C=C2
Byakangelicol	4	Accepted	316.09	0.669	0.226	3.198	-4.489	0.016	COC1=C2C=COC2=C(OC[C@H]2OC2(C)C)C2=C1C=CC(=O)O2
cis-Limonene-1,2-oxide	1	Accepted	152.12	0.598	0.055	2.976	-3.332	0.78	CC(=C)[C@@H]1CC[C@@]2(C)O[C@H]2C1
Citronetin	1	Accepted	272.07	0.476	0.299	2.606	-3.611	0.053	OC1=CC(O)=C2C(=O)CC(OC2=C1)C1=CC=CC=C1O
Heraclenin	4	Accepted	286.08	0.843	0.287	2.952	-4.172	0.027	CC1(C)O[C@H]1COC1=C2OC=CC2=CC2=C1OC(=O)C=C2
Isoeriocitrin	2	Rejected	596.17	0.364	0.651	-0.047	-4.132	0.117	C[C@@H]1O[C@@H](O[C@@H]2[C@@H](O)[C@H](O)[C@@H](CO)O[C@H]2OC2=CC(O)=C3C(=O)C[C@H](OC3=C2)C2=CC(O)=C(O)C=C2)[C@H](O)[C@H](O)[C@H]1O
Isolimocitrol 3-beta-D-glucoside	1	Rejected	538.13	0.025	0.709	0.304	-3.345	0.035	COC1=C(O)C=C(C=C1)C1=C(O[C@@H]2O[C@H](CO)[C@@H](O)[C@H](O)[C@H]2O)C(=O)C2=C(O1)C(OC)=C(O)C(OC)=C2O
Isorhamnetin 3-arabino-glucoside	1	Rejected	610.15	0.04	0.826	-0.233	-3.587	0.077	COC1=C(O)C=CC(=C1)C1=C(O[C@@H]2O[C@H](CO)[C@@H](OC3OC[C@H](O)[C@H](O)[C@H]3O)[C@H](O)[C@H]2O)C(=O)C2=C(O)C=C(O)C=C2O1
Limonoate a-ring-lactone	2	Accepted	488.2	0.657	0.029	1.469	-4.397	0.7	[H][C@](O)(C1=COC=C1)[C@]1(C)CC[C@]2([H])[C@@]34COC(=O)C[C@]3([H])OC(C)(C)[C@]4([H])CC(=O)[C@@]2(C)[C@]11O[C@]1([H])C(O)=O
Linonin	2	Accepted	470.19	0.377	0.088	2.489	-4.988	0.84	CC1(C)O[C@H]2CC(=O)OC[C@@]22[C@H]1CC(=O)[C@]1(C)[C@@H]2CC[C@@]2(C)[C@@H](OC(=O)[C@H]3O[C@@]123)C1=COC=C1
Methylheptanone	1	Accepted	128.12	0.045	0.015	2.331	-1.7	0.998	CCCCCC(=O)CC
Neobyakangelicol	3	Accepted	316.09	0.866	0.161	2.261	-3.67	0.022	COC1=C2C=COC2=C(OCC(O)C(C)=C)C2=C1C=CC(=O)O2
Neohesperidoside	0	Accepted	326.12	0.028	0.218	-2.17	-0.451	0.239	[H][C@@]1(C)O[C@@]([H])(O[C@@]2([H])[C@]([H])(O)O[C@]([H])(CO)[C@@]([H])(O)[C@]2([H])O)[C@]([H])(O)[C@]([H])(O)[C@@]1([H])O
Nomilinic acid 17-O-beta-D-glucoside	2	Rejected	712.29	0.209	0.18	0.148	-2.448	0.078	[H][C@](CC(O)=O)(OC(C)=O)[C@@]1(C)[C@@]([H])(CC(=O)[C@]2(C)[C@]1([H])CC[C@@](C)([C@@]([H])(O[C@]1([H])O[C@]([H])(CO)[C@@]([H])(O)[C@]([H])(O)[C@@]1([H])O)C1=COC=C1)C21O[C@]1([H])C(O)=O)C(C)(C)O
Obacunone 17-O-beta-D-glucoside	3	Rejected	634.26	0.812	0.114	1.742	-3.357	0.234	CC1(CCC2C3(C)C=CC(=O)OC(C)(C)C3CC(=O)C2(C)C11OC1C(O)=O)C(OC1OC(CO)C(O)C(O)C1O)C1=COC=C1
Quercetin 3,5-diglucoside	2	Rejected	626.15	0.03	0.738	-1.014	-3.396	0.118	OC[C@H]1O[C@@H](OC2=C3C(=O)C(O[C@@H]4O[C@H](CO)[C@@H](O)[C@H](O)[C@H]4O)=C(OC3=CC(O)=C2)C2=CC(O)=C(O)C=C2)[C@H](O)[C@@H](O)[C@@H]1O
Suberosin	1	Accepted	244.11	0.584	0.031	3.8	-4.929	0.058	COC1=C(CC=C(C)C)C=C2C=CC(=O)OC2=C1
2-Methyl-5-phenylpyridine	0	Accepted	169.09	0.473	0.652	2.955	-2.393	0.747	CC1=CC=C(C=N1)C1=CC=CC=C1
2-trans-O-Feruloylglucaric acid	5	Rejected	386.08	0.057	0.013	-1.058	-1.242	0.857	COC1=C(O)C=CC(\C=C\C(=O)O[C@H]([C@@H](O)[C@H](O)[C@H](O)C(O)=O)C(O)=O)=C1
3-Heptylpyridine	0	Accepted	177.15	0.113	0.007	4.219	-2.778	0.984	CCCCCCCC1=CN=CC=C1
3-Methylbut-1-ene	1	Accepted	70.08	0.097	0.021	2.686	-2.602	0.991	CC(C)C=C
3-Propylpyridine	0	Accepted	121.09	0.246	0.007	2.19	-0.858	0.948	CCCC1=CN=CC=C1
4-(3-Methyl-2-butenoxy)-iso-nitroso-acetophenone	2	Accepted	233.11	0.827	0.825	3.296	-4.085	0.098	CC(C)=CCOC1=CC=C(C=C1)C(=O)\C=N\O
5-Acetyl-2-methylpyridine	0	Accepted	135.07	0.758	0.021	0.716	-0.309	0.972	CC(=O)C1=CN=C(C)C=C1
5-Hexyl-2-methylpyridine	0	Accepted	270.18	0.073	0.028	3.519	-2.873	0.336	CCCCNC1=NC(NCC2=CC=CC=C2)=NC(C)=C1
Citflavanone	0	Accepted	278.11	0.481	0.051	4.232	-6.367	0.382	CC(C)(C1=CC=C(OC#N)C=C1)C1=CC=C(OC#N)C=C1
Galactan	0	Rejected	532.2	0.017	0.101	-3.492	0.166	0.411	COC1OC(CO)C(OC2OC(CO)C(OC3OC(CO)C(OC)C(O)C3O)C(O)C2O)C(O)C1O
Glucosan	0	Accepted	162.05	0.215	0.676	-1.943	-0.153	0.499	OC1C2COC(O2)C(O)C1O
Heptulose	0	Accepted	274.05	0.05	0.066	-2.489	-0.058	0.309	C[C@]1(OP(O)(O)=O)O[C@H](CO)[C@@H](O)[C@H](O)[C@H]1O
Isoprene	2	Accepted	68.06	0.867	0.1	2.244	-2.19	0.965	CC(=C)C=C
Lochnocarpol A	1	Accepted	408.19	0.108	0.016	6.682	-3.368	0.015	CC(C)=CCC1=C(O)C2=C(OC(CC2=O)C2=CC=C(O)C=C2)C(CC=C(C)C)=C1O
Mevalonic acid	0	Accepted	148.07	0.024	0.011	-0.945	0.144	0.847	C[C@@](O)(CCO)CC(O)=O
N,N-Dimethyl-3-methylaniline	1	Accepted	135.1	0.862	0.715	2.773	-2.534	0.986	CN(C)C1=CC(C)=CC=C1
N,N-Dimethylaniline	1	Accepted	121.09	0.849	0.742	2.265	-1.855	0.944	CN(C)C1=CC=CC=C1
Nootkatol	0	Accepted	220.18	0.891	0.012	3.696	-3.929	0.983	CC1CC(O)C=C2CCC(CC12C)C(C)=C
Nordentatin	3	Accepted	312.14	0.937	0.015	4.796	-3.701	0.015	CC(C)(C=C)C1=C(O)C2=C(OC(C)(C)C=C2)C2=C1OC(=O)C=C2
Phytofluene A	1	Rejected	542.49	0.014	0.001	9.746	-5.52	0.004	CC(C)=CCC\C(C)=C\CC\C(C)=C\CC\C(C)=C\C=C\C=C(/C)\C=C\C=C(/C)CC\C=C(/C)CCC=C(C)C
Phytofluene B	1	Rejected	542.49	0.014	0.001	9.746	-5.52	0.004	CC(C)=CCC\C(C)=C\CC\C(C)=C\CC\C(C)=C\C=C\C=C(/C)\C=C\C=C(/C)CC\C=C(/C)CCC=C(C)C
Poncitrin	2	Accepted	326.15	0.922	0.018	4.95	-4.557	0.022	COC1=C2C=CC(C)(C)OC2=C(C2=C1C=CC(=O)O2)C(C)(C)C=C
Sinensiaxanthin	2	Accepted	410.28	0.899	0.488	2.425	-4.57	0.303	C\C(\C=C\CO)=C/C=C/C=C(\C)/C=C/C=C(\C)/C=C/C12OC1(C)CC(O)CC2(C)C
Valencic acid	0	Accepted	206.09	0.406	0.008	3.696	-3.45	0.31	CC(C)=CCOC1=CC=C(C=C1)C(O)=O
Vitexin xyloside	1	Rejected	580.14	0.059	0.761	-0.932	-3.424	0.16	OC1OC(OCC2OC(C(O)C(O)C2O)C2=C(O)C=C(O)C3=C2OC(=CC3=O)C2=CC=C(O)C=C2)C(O)C(O)C1O
16-O-Methylcafestol	1	Accepted	330.22	0.551	0.014	4.263	-3.562	0.101	CO[C@]1(CO)C[C@]23C[C@H]1CC[C@H]2[C@]1(C)CCC2=C(C=CO2)[C@H]1CC3
2,3,5-Trimethylphenol	1	Accepted	136.09	0.297	0.039	2.959	-2.174	0.869	CC1=CC(C)=C(C)C(O)=C1
2-Ethylphenol	1	Accepted	122.07	0.307	0.172	2.473	-1.36	0.389	CCC1=CC=CC=C1O
Arabinogalactose	0	Accepted	312.11	0.028	0.129	-2.537	-0.113	0.292	[H][C@]1(O)CO[C@]([H])(O[C@]2([H])[C@@]([H])(O)C([H])(O)O[C@]([H])(CO)[C@]2([H])O)[C@]([H])(O)[C@@]1([H])O
Atractyligenin	0	Accepted	320.2	0.675	0.01	1.719	-3.669	0.622	CC12CC(O)CC(C1CCC13CC(CCC21)C(=C)C3O)C(O)=O
Galactomannan	0	Rejected	504.17	0.022	0.092	-3.01	-0.612	0.301	OC[C@H]1O[C@H](OC[C@H]2O[C@@H](O)[C@@H](O)[C@@H](O)[C@@H]2O[C@@H]2O[C@H](CO)[C@@H](O)[C@H](O)[C@@H]2O)[C@H](O)[C@@H](O)[C@H]1O
Polyamines	1	Accepted	390.12	0.462	0.04	-6.007	-0.766	0.036	[Gd+3].CNC[C@H](O)[C@@H](O)[C@H](O)[C@H](O)CO.CNC[C@H](O)[C@@H](O)[C@H](O)[C@H](O)CO.OC(=O)CN(CCN(CCN(CC(O)=O)CC([O-])=O)CC([O-])=O)CC([O-])=O
3,6-Undecadienal	2	Accepted	166.14	0.655	0.867	3.042	-2.78	0.994	CCCCCC\C=C\C=C\C=O
3-O-Methylkaempferol	1	Accepted	300.06	0.135	0.638	2.879	-3.577	0.01	COC1=C(OC2=C(C(O)=CC(O)=C2)C1=O)C1=CC=C(O)C=C1
3-Octenal	1	Accepted	126.1	0.687	0.619	1.967	-2.583	0.98	CCCC\C=C\CC=O
5-Decenal	1	Accepted	154.14	0.266	0.015	2.794	-3.209	0.977	[H]\C(CCCC)=C(\[H])CCCC=O
7-Dodecenal	1	Accepted	182.17	0.46	0.066	4.129	-3.472	0.992	CCCCC=CCCCCCC=O
9-Tetradecenal	1	Accepted	210.2	0.336	0.034	5.124	-4.487	0.986	CCCCC=CCCCCCCCC=O
Coriandrinol	0	Rejected	576.44	0.093	0.025	6.136	-5.317	0.011	[H][C@@](C)(CC[C@@]([H])(CC)C(C)C)C1([H])CC[C@@]2([H])[C@]3([H])CC=C4CC([H])(CC[C@]4(C)[C@@]3([H])CC[C@]12C)O[C@]1([H])O[C@]([H])(CO)[C@@]([H])(O)[C@]([H])(O)[C@@]1([H])O
Ethyl pentadecanoate	0	Accepted	270.26	0.069	0.006	7.011	-6.607	0.178	CCCCCCCCCCCCCCC(=O)OCC
Isoscopoletin	2	Accepted	192.04	0.602	0.061	1.186	-2.206	0.166	COC1=C(O)C=C2C=CC(=O)OC2=C1
Kaempferol 3-O-alpha-L-(2,3-di-trans-p-coumaroyl-rhamnopyranoside)	3	Rejected	724.18	0.103	0.664	4.795	-4.272	0.011	C[C@@H]1O[C@@H](OC2=C(OC3=C(C(O)=CC(O)=C3)C2=O)C2=CC=C(O)C=C2)[C@H](OC(=O)\C=C\C2=CC=C(O)C=C2)[C@H](OC(=O)\C=C\C2=CC=C(O)C=C2)[C@H]1O
Kaempferol 3-O-alpha-L-(3-trans-p-coumaroyl-rhamnopyranoside)	2	Rejected	578.14	0.097	0.733	3.588	-4.578	0.011	C[C@@H]1O[C@@H](OC2=C(OC3=C(C(O)=CC(O)=C3)C2=O)C2=CC=C(O)C=C2)[C@H](O)[C@H](OC(=O)\C=C\C2=CC=C(O)C=C2)[C@H]1O
Triacontanol	0	Accepted	438.48	0.015	0.007	12.664	-7.601	0.002	CCCCCCCCCCCCCCCCCCCCCCCCCCCCCCO
1-Tricosanol	0	Accepted	340.37	0.026	0.006	9.888	-7.132	0.013	CCCCCCCCCCCCCCCCCCCCCCCO
Catechin 7-xyloside	2	Accepted	422.12	0.595	0.605	0.173	-3.136	0.09	O[C@@H]1CO[C@@H](OC2=CC3=C(C[C@H](O)[C@H](O3)C3=CC(O)=C(O)C=C3)C(O)=C2)[C@H](O)[C@H]1O
Lignoceryl alcohol	0	Accepted	354.39	0.024	0.007	10.31	-7.2	0.01	CCCCCCCCCCCCCCCCCCCCCCCCO
N-Triacosane	0	Accepted	324.38	0.022	0.008	11.214	-7.621	0.016	CCCCCCCCCCCCCCCCCCCCCCC
Quercetin 3-O-glucosyl-galactoside	2	Rejected	626.15	0.049	0.832	-0.659	-2.87	0.058	OC[C@H]1O[C@@H](OC[C@H]2O[C@@H](OC3=C(OC4=C(C(O)=CC(O)=C4)C3=O)C3=CC(O)=C(O)C=C3)[C@H](O)[C@@H](O)[C@@H]2O)[C@H](O)[C@@H](O)[C@H]1O
13-cis-Crocin	2	Rejected	976.38	0.047	0.122	-0.909	-2.593	0.294	C\C(\C=C\C=C(/C)C(=O)O[C@@H]1O[C@H](CO[C@@H]2O[C@H](CO)[C@@H](O)[C@H](O)[C@H]2O)[C@@H](O)[C@H](O)[C@H]1O)=C\C=C\C=C(/C)\C=C\C=C(\C)C(=O)O[C@@H]1O[C@H](CO[C@@H]2O[C@H](CO)[C@@H](O)[C@H](O)[C@H]2O)[C@@H](O)[C@H](O)[C@H]1O
Crocose	1	Accepted	210.07	0.002	0.051	-2.448	0.213	0.567	[H][C@@](O)(CO)C(=O)[C@]([H])(O)[C@]([H])(O)[C@]([H])(O)CO
Kaempferol 3-O-beta-D-glucopyranosyl-(1->2)-beta-D-6-acetyl-glucopyranoside	2	Rejected	652.16	0.1	0.795	-0.121	-4.05	0.098	CC(=O)OC[C@H]1O[C@@H](OC2=C(OC3=C(C(O)=CC(O)=C3)C2=O)C2=CC=C(O)C=C2)[C@H](O[C@@H]2O[C@H](CO)[C@@H](O)[C@H](O)[C@H]2O)[C@@H](O)[C@@H]1O
Protocrocin	1	Rejected	1572.73	0.035	0.084	0.147	-2.809	0.069	C/C(/C=C/C(/C)=C\C(\O[C@@H]1O[C@H](CO[C@@H]2O[C@H](CO)[C@@H](O)[C@H](O)[C@H]2O)[C@@H](O)[C@H](O)[C@H]1O)=C\C1=C(C)CC(CC1(C)C)O[C@@H]1O[C@H](CO)[C@@H](O)[C@H](O)[C@H]1O)=C\C=C/C=C(\C)/C=C/C(/C)=C/C(/O[C@H]1O[C@@H](CO[C@H]2O[C@@H](CO)[C@H](O)[C@@H](O)[C@@H]2O)[C@H](O)[C@@H](O)[C@@H]1O)=C/C1=C(C)CC(CC1(C)C)O[C@H]1O[C@@H](CO)[C@H](O)[C@@H](O)[C@@H]1O
24-Methyl-25(27)-dehydrocycloartanol	0	Accepted	440.4	0.055	0.002	8.073	-6.753	0.091	[H][C@@]12CC[C@]3([H])[C@]4(C[C@@]14CC[C@]1(C)[C@H](CC[C@@]21C)[C@H](C)CCC(C)C(C)=C)CC[C@H](O)C3(C)C
24-Methylene-24-dihydroparkeol	0	Accepted	440.4	0.086	0.004	8.187	-6.831	0.298	CC(C)C(=C)CC[C@@H](C)[C@H]1CC[C@@]2(C)C3CCC4C(C)(C)[C@@H](O)CC[C@]4(C)C3=CC[C@]12C
Cucurbitin	0	Accepted	130.07	0.097	0.144	-3.265	-0.546	0.13	NC1(CCNC1)C(O)=O
Melonin	1	Accepted	282.21	0.237	0.466	4.079	-3.832	0.842	CCC12CCCN3CCC4(CC1)NC1=C(C=CC=C1)C4C23
Meloside	1	Rejected	594.16	0.062	0.492	-0.175	-2.793	0.122	OC[C@H]1O[C@@H](O[C@@H]2[C@@H](O)[C@H](O)[C@@H](CO)O[C@H]2C2=C(O)C=C3OC(=CC(=O)C3=C2O)C2=CC=C(O)C=C2)[C@H](O)[C@@H](O)[C@@H]1O
(24R)-14alpha-Methyl-24-ethyl-5alpha-cholest-9(11)-en-3beta-ol	0	Accepted	428.4	0.259	0.007	8.044	-7.077	0.361	[H][C@@]12CCC3C(=CC[C@]4(C)C(CC[C@@]34C)[C@H](C)CC[C@H](CC)C(C)C)[C@@]1(C)CC[C@H](O)C2
24epsilon-Ethyl-25(27)-dehydrolophenol	0	Accepted	426.39	0.084	0.002	8.055	-7.154	0.421	[H][C@@]12CC=C3C4CC[C@H]([C@H](C)CCC(CC)C(C)=C)[C@@]4(C)CCC3[C@@]1(C)CC[C@H](O)[C@H]2C
24epsilon-Ethyl-31-norlanosta-8,25(27)-dien-3beta-ol	0	Accepted	440.4	0.13	0.006	7.781	-6.853	0.052	[H][C@@]12CCC3=C(CC[C@]4(C)[C@H](CC[C@@]34C)[C@H](C)CCC(CC)C(C)=C)[C@@]1(C)CC[C@H](O)[C@H]2C
24-Ethyl-5alpha-cholesta-7,22-dien-3beta-ol	0	Accepted	412.37	0.037	0.005	7.115	-7.14	0.676	CCC(C(C)C)\C=C\[C@@H](C)C1CCC2C3=CC[C@@]4([H])C[C@@H](O)CC[C@]4(C)C3CC[C@]12C
24-Ethylcholesta-5-en-7beta-ol	0	Accepted	414.39	0.007	0.006	7.007	-7.055	0.409	CCC(CC[C@@H](C)C1CCC2C3[C@@H](O)C=C4CCCC[C@]4(C)C3CC[C@]12C)C(C)C
24-Methylcholest-7-en-3-beta-ol	0	Accepted	400.37	0.042	0.006	7.258	-7.214	0.816	CC(C)C(C)CC[C@@H](C)C1CCC2C3=CCC4C[C@@H](O)CC[C@]4(C)C3CC[C@]12C
24-Methylene-24-dihydrolanosterol	0	Accepted	440.4	0.017	0.004	7.468	-6.644	0.032	[H][C@@]12CCC3=C(CC[C@]4(C)[C@H](CC[C@@]34C)[C@H](C)CCC(=C)C(C)C)[C@@]1(C)CC[C@H](O)C2(C)C
7,22-Stigmastadien-3beta-ol	0	Accepted	412.37	0.033	0.004	7.109	-7.118	0.759	CC[C@@H](C(C)C)\C=C\[C@@H](C)C1CCC2C3=CCC4C[C@@H](O)CC[C@]4(C)C3CC[C@]12C
7beta-Stigmasten-3beta-ol	0	Accepted	414.39	0.028	0.004	7.699	-7.285	0.666	CC[C@H](CC[C@@H](C)C1CCC2C3=CCC4C[C@@H](O)CC[C@]4(C)C3CC[C@]12C)C(C)C
Cucurbitacin A	2	Accepted	574.31	0.789	0.033	2.213	-3.801	0.789	CC(=O)OC(C)(C)\C=C\C(=O)C(C)(O)C1C(O)CC2(C)C3CC=C4C(CC(O)C(=O)C4(C)C)C3(CO)C(=O)CC12C
Lysolecithin	0	Accepted	521.35	0.279	0.092	1.673	-0.686	0.005	CCCCCCCC\C=C/CCCCCCCC(=O)OC[C@@]([H])(O)COP([O-])(=O)OCC[N+](C)(C)C
PL	0	Accepted	542.31	0.332	0.057	1.286	-3.905	0.257	CCC1CC(C)C(O)\C=C\C=C\CC(C)OC(=O)CC(O)C(OC)C1OC1OC(C)CC(O)(C1O)C(C)=O
Stellasterol	0	Accepted	398.35	0.037	0.02	6.438	-6.194	0.971	CC(C)C(C)\C=C/C(C)C1CCC2C3=CCC4CC(O)CCC4(C)C3CCC12C
Apigenin 7-glucuronosyl-glucoside	1	Rejected	608.14	0.249	0.289	0.2	-3.341	0.07	O[C@H]1[C@H](O)[C@@H](CO[C@@H]2O[C@@H]([C@@H](O)[C@H](O)[C@H]2O)C(O)=O)O[C@@H](OC2=CC3=C(C(O)=C2)C(=O)C=C(O3)C2=CC=C(O)C=C2)[C@@H]1O
Luteolin 7-glucuronylglucoside	2	Rejected	608.14	0.208	0.681	0.284	-3.517	0.041	O[C@H]1C[C@@H](CO[C@@H]2O[C@@H]([C@@H](O)[C@H](O)[C@H]2O)C(O)=O)O[C@H]([C@@H]1O)C1=C(O)C2=C(OC(=CC2=O)C2=CC(O)=C(O)C=C2)C=C1O
p-Isopropylphenol	1	Accepted	136.09	0.357	0.043	2.876	-1.764	0.483	CC(C)C1=CC=C(O)C=C1
p-Mentha-1,3-dien-7-al	1	Accepted	150.1	0.84	0.146	1.707	-1.867	0.922	CC(C)C1=CC=C(CC1)C=O
p-Mentha-1,4-dien-7-al	2	Accepted	150.1	0.923	0.107	2.639	-2.572	0.973	CC(C)C1=CCC(C=O)=CC1
p-Mentha-3-en-7-ol	0	Accepted	154.14	0.909	0.015	2.767	-2.372	0.96	CC(C)C1=CCC(CO)CC1
2,5-Dihydroxybisabola-3,10-diene	0	Accepted	238.19	0.084	0.009	3.469	-2.696	0.249	C[C@@H](CCC=C(C)C)C1C[C@@H](O)C(C)=C[C@H]1O
2-Hydroxymethylanthraquinone	4	Accepted	238.06	0.795	0.518	3.225	-3.944	0.142	OCC1=CC=C2C(=O)C3=CC=CC=C3C(=O)C2=C1
4-Hydroxybisabola-2,10-dien-9-one	2	Accepted	236.18	0.744	0.009	2.979	-3.235	0.136	[H][C@@]1(CC[C@@](C)(O)C=C1)[C@@H](C)CC(=O)C=C(C)C
5-Hydroxy-4-methoxybisabola-2,10-dien-9-one	2	Accepted	266.19	0.86	0.006	2.694	-1.685	0.814	[H][C@@]1(C[C@H](O)[C@@](C)(OC)C=C1)[C@@H](C)CC(=O)C=C(C)C
5-Hydroxyprocurcumenol	1	Accepted	250.16	0.976	0.032	1.932	-3.194	0.868	[H][C@@]12CC[C@](C)(O)[C@@]1(O)CC(=C(C)C)C(=O)C=C2C
alpha-Curcumene	1	Accepted	174.14	0.28	0.113	4.901	-5.246	0.48	CC(CCC=C)C1=CC=C(C)C=C1
Bisabola-3,10-dien-2-one	0	Accepted	220.18	0.754	0.037	5.168	-4.353	0.906	C[C@@H](CCC=C(C)C)C1CCC(C)=CC1=O
Curzerenone C	3	Accepted	230.13	0.89	0.04	3.301	-5.17	0.011	[H][C@]1(C(C)=C)C(=O)C2=C(C[C@]1(C)C=C)OC=C2C
gamma-Atlantone	2	Accepted	218.17	0.905	0.008	4.294	-4.563	0.147	CC(C)=CC(=O)C\C(C)=C1\CCC(C)=CC1
Germacrene	0	Accepted	204.19	0.038	0.001	5.193	-5.339	0.339	CC(C)=C1CC\C(C)=C\CC\C(C)=C\C1
Germacrone	1	Accepted	218.17	0.313	0.011	3.464	-4.256	0.167	CC(C)=C1C\C=C(C)\CC\C=C(C)\CC1=O
Guaiane	0	Accepted	208.22	0.559	0.384	6.06	-5.379	0.345	CC(C)[C@@H]1CC[C@H](C)[C@@H]2CC[C@H](C)[C@@H]2C1
Tetrahydrocurcumin	2	Accepted	372.16	0.035	0.508	1.899	-2.496	0.068	COC1=CC(CCC(=O)CC(=O)CCC2=CC(OC)=C(O)C=C2)=CC=C1O
Aldobionic acid	0	Rejected	356.1	0.011	0.163	-2.778	-0.111	0.291	O[C@@H]1O[C@H](CO[C@@H]2O[C@@H]([C@@H](O)[C@H](O)[C@H]2O)C(O)=O)[C@H](O)[C@H](O)[C@H]1O
2-Undecane	0	Accepted	156.19	0.053	0.008	6.169	-6.168	0.627	CCCCCCCCCCC
Cardiolipin	0	Rejected	1465.1	0.038	0.003	21.952	-5.872	0	[H]C(O)(COP(O)(=O)OC[C@@]([H])(COC(=O)CCCCCCCCCCCCCCCCC)OC(=O)CCCCCCCCCCCCCCCCC)COP(O)(=O)OC[C@@]([H])(COC(=O)CCCCCCCCCCCCCCCCC)OC(=O)CCCCCCCCCCCCCCCCC
cis-p-Menth-2-en-1-ol	0	Accepted	154.14	0.059	0.006	2.851	-1.808	0.698	CC(C)[C@H]1CC[C@](C)(O)C=C1
delta-5,7,22-Cholestatrienol	0	Accepted	382.32	0.039	0.014	5.877	-6.584	0.799	C(C)(C)C\C=C\[C@@H](C)C1CCC2C3=CC=C4C[C@@H](O)CC[C@]4(C)C3CC[C@]12C
Desmosterol	0	Accepted	384.34	0.295	0.003	7.332	-6.594	0.376	[H][C@@]12CC=C3C[C@@H](O)CC[C@]3(C)[C@H]1CC[C@]1(C)[C@H](CC[C@@H]21)C(C)CCC=C(C)C
N-Heptane	0	Accepted	100.13	0.082	0.008	4.228	-4.166	0.982	CCCCCCC
p-Menth-cis-2-en-1-ol	0	Accepted	154.14	0.119	0.014	2.745	-2.061	0.988	CC(C)C1CCC(C)(O)C=C1
p-Menthene	0	Accepted	138.14	0.498	0.008	4.711	-4.328	0.408	CC(C)[C@@H]1CCC(C)=CC1
trans-p-Menth-2-en-1-ol	0	Accepted	154.14	0.046	0.007	2.795	-2.599	0.601	CC(C)[C@H]1CC[C@@](C)(O)C=C1
1-beta-Hydroxyeuscaphic acid	0	Accepted	504.35	0.031	0.005	3.656	-3.763	0.487	[H][C@]12C3=CCC4[C@@]5(C)[C@H](O)[C@@H](O)[C@@H](O)C(C)(C)C5CC[C@@]4(C)[C@]3(C)CC[C@]1(CC[C@@H](C)[C@@]2(C)O)C(O)=O
2alpha,3alpha,19alpha-Trihydroxyurs-12-en-28-oic acid	0	Accepted	488.35	0.026	0.033	4.486	-3.74	0.912	CC1CCC2(CCC3(C)C(=CCC4C5(C)CC(O)C(O)C(C)(C)C5CCC34C)C2C1(C)O)C(O)=O
Aucaparin	1	Accepted	230.09	0.33	0.152	3.075	-4.072	0.321	COC1=CC(=CC(OC)=C1O)C1=CC=CC=C1
Ceryl palmitate	0	Accepted	480.49	0.021	0.004	13.067	-7.911	0.003	CCCCCCCCCCCCCCCCOC(=O)CCCCCCCCCCCCCCC
Creatine	1	Accepted	131.07	0.096	0.014	-2.888	-1.026	0.363	CN(CC(O)=O)C(N)=N
DL-Lactic acid	2	Accepted	90.03	0.107	0.307	-1.047	0.395	0.229	CC(O)C(O)=O
gamma-Guanidinobutyric acid	1	Accepted	145.09	0.057	0.084	-2.655	-1.168	0.921	NC(N)=NCCCC(O)=O
Guanidine	1	Accepted	59.05	0.192	0.031	-1.58	-1.481	0.37	NC(N)=N
Guanidino acetic acid	1	Accepted	117.05	0.06	0.055	-2.749	-1.204	0.759	NC(=N)NCC(O)=O
Guanidino succinic acid	1	Accepted	175.06	0.09	0.024	-2.467	-1.102	0.713	NC(=N)NC(CC([O-])=O)C([O-])=O
Leucopelargonidin 3-O-alpha-L-rhamno-beta-D-glucopyranoside	1	Rejected	598.19	0.068	0.133	-0.644	-2.05	0.117	C[C@@H]1O[C@@H](OC[C@H]2O[C@@H](OC3C(O)C4=C(O)C=C(O)C=C4OC3C3=CC=C(O)C=C3)[C@H](O)[C@@H](O)[C@@H]2O)[C@H](O)[C@H](O)[C@H]1O
Methylguanidine	1	Accepted	73.06	0.216	0.021	-1.272	0.869	0.372	CNC(N)=N
Docosenoic acid	0	Accepted	338.32	0.072	0.004	8.869	-6.266	0.03	CCCCCCCCCCCCCCCCCCCC=CC(O)=O
Dodecadienoic acid	1	Accepted	196.15	0.632	0.026	3.768	-3.06	0.765	CCCCCCCC=CC=CC(O)=O
Dodecatrienoic acid	2	Accepted	194.13	0.41	0.684	3.985	-3.167	0.84	CCCCCC=CC=CC=CC(O)=O
Heptadecenoic acid	0	Accepted	268.24	0.112	0.005	6.897	-5.084	0.178	CCCCCCCCCCCCCCC=CC(O)=O
Norvaline	0	Accepted	117.08	0.087	0.022	-1.975	-1.095	0.645	CCCC(N)C(O)=O
Pentadecenoic acid	0	Accepted	240.21	0.156	0.005	6.031	-4.35	0.412	CCCCCCCCCCCCC=CC(O)=O
4,6-Benzylidene-D-glucose	0	Accepted	268.09	0.186	0.649	-0.305	-1.11	0.38	OC1OC2COC(OC2C(O)C1O)C1=CC=CC=C1
Sitosterol 3-O-(6'-O-linoleyl-beta-D-glucoside)	0	Rejected	838.67	0.031	0.076	10.409	-3.432	0.007	CCCCC\C=C/C\C=C/CCCCCCCC(=O)OC[C@H]1O[C@@H](O[C@H]2CC[C@@]3(C)C(=CC[C@@]4([H])C5CC[C@H]([C@H](C)CC[C@@H](CC)C(C)C)[C@@]5(C)CCC34)C2)[C@H](O)[C@@H](O)[C@@H]1O
Sitosterol 3-O-(6'-O-oleyl-beta-D-glucoside)	0	Rejected	840.68	0.02	0.022	11.7	-4.674	0.005	CCCCCCCC\C=C/CCCCCCCC(=O)OC[C@H]1O[C@@H](O[C@H]2CC[C@@]3(C)C(=CC[C@H]4C5CC[C@H]([C@H](C)CC[C@@H](CC)C(C)C)[C@@]5(C)CCC34)C2)[C@H](O)[C@@H](O)[C@@H]1O
Sitosterol 3-O-(6'-O-palmitoyl-beta-D-glucoside)	0	Rejected	814.67	0.017	0.013	12.211	-7.001	0.004	CCCCCCCCCCCCCCCC(=O)OC[C@H]1O[C@@H](O[C@H]2CC[C@]3(C)C4CC[C@]5(C)[C@H](CCC5[C@@H]4CC=C3C2)[C@H](C)CC[C@@H](CC)C(C)C)[C@H](O)[C@@H](O)[C@@H]1O
Sitosterol 3-O-(6'-O-stearyl-beta-D-glucoside)	0	Rejected	842.7	0.014	0.012	12.999	-7.236	0.003	CCCCCCCCCCCCCCCCCC(=O)OC[C@H]1O[C@@H](O[C@H]2CC[C@]3(C)C4CC[C@]5(C)[C@H](CCC5[C@@H]4CC=C3C2)[C@H](C)CC[C@@H](CC)C(C)C)[C@H](O)[C@@H](O)[C@@H]1O
alpha-Taraxasterol	0	Accepted	426.39	0.002	0.002	6.652	-6.307	0.024	[H][C@]12CC[C@]3([H])[C@@]4(C)CC[C@@H](O)C(C)(C)[C@]4([H])CC[C@@]3(C)[C@]1(C)CC[C@@]1(C)CCC(=C)[C@@H](C)[C@]21[H]
Anthocyanins	0	Accepted	207.08	0.786	0.634	4.672	-5.914	0.104	C1=CC=C(C=C1)C1=[O+]C2=CC=CC=C2C=C1
Apigenin 6-C-arabinosyl-8-C-glucoside	1	Rejected	696.19	0.102	0.581	-0.904	-1.364	0.291	OC[C@H]1O[C@@H](OC2=CC=C(C=C2)C2=CC(=O)C3=C(O2)C(C2O[C@H](CO)[C@@H](O)[C@H](O)[C@H]2O)=C(O)C(C2O[C@H](CO)[C@@H](O)[C@@H]2O)=C3O)[C@@H](O)[C@@H]1O
Apigenin 6-C-glucosyl-8-C-arabinoside	1	Rejected	726.2	0.07	0.458	-1.171	-1.201	0.312	OC[C@H]1OC([C@@H](O)[C@@H]1O)C1=C(O)C(C2O[C@H](CO)[C@@H](O)[C@H](O)[C@H]2O)=C(O)C2=C1OC(=CC2=O)C1=CC=C(O[C@@H]2O[C@H](CO)[C@@H](O)[C@H](O)[C@H]2O)C=C1
Cadalene	0	Accepted	198.14	0.72	0.661	5.251	-6.096	0.604	CC(C)C1=C2C=C(C)C=CC2=C(C)C=C1
Calotropenol acetate	0	Accepted	468.4	0.012	0.017	7.078	-7	0.729	CC1CCC2(C)CCC3(C)C(CCC4C5(C)CCC(OC(C)=O)C(C)(C)C5CCC34C)C2C1=C
Cerebroside	0	Accepted	299.28	0.034	0.016	4.424	-4.193	0.167	[H]\C(CCCCCCCCCCCCC)=C(\[H])[C@@]([H])(O)[C@@]([H])(N)CO
Esterase	1	Accepted	155.09	0.696	0.625	0.151	0.623	0.89	Br.COC(=O)C1=CCCN(C)C1
Glycosides	1	Rejected	584.28	0.638	0.119	-0.224	-2.451	0.118	C[C@H]1O[C@@H](O[C@H]2C[C@H](O)[C@]3(CO)[C@H]4[C@H](O)C[C@]5(C)[C@@H](CC[C@@]5(O)[C@@H]4CC[C@@]3(O)C2)C2=CC(=O)OC2)[C@H](O)[C@H](O)[C@@H]1O
Hydroxycaryophyllene	1	Accepted	236.18	0.449	0.067	2.712	-2.681	0.845	CC12CCC3C(CC3(C)CO)C(=C)CCC1O2
Monoacyl glycerol	2	Accepted	120.04	0.063	0.025	-1.472	0.375	0.243	OCC(CO)OC=O
N,N-Dimethylanthranilic acid	1	Accepted	165.08	0.154	0.043	2.208	-2.284	0.457	CN(C)C1=CC=CC=C1C(O)=O
Psoberan	3	Accepted	216.04	0.863	0.061	2.381	-3.393	0.034	O=C1OC2=CC3=C(C=CO3)C=C2C=C1.COC1=C2C=CC(=O)OC2=CC2=C1C=CO2
Photoantheole	0	Accepted	240.12	0.744	0.864	3.823	-4.867	0.356	COC1=CC=C(\C=C\C2=CC=C(OC)C=C2)C=C1
trans-1,8-Terpin	0	Accepted	172.15	0.291	0.008	0.884	-0.549	0.906	CC(C)(O)C1CCC(C)(O)CC1
1-Dodecene	1	Accepted	168.19	0.095	0.013	6.263	-6.168	0.952	CCCCCCCCCCC=C
2,2-Dimethylhexanal	2	Rejected	644.33	0.797	0.025	6.67	-3.804	0.964	CC(=O)CC(=O)\C=C\CC1(C)CCC2=C(C)C(O)=C(C)C(C)=C2O1.CC(=O)OC1=C(C)C(C)=C2OC(C)(C\C=C\C(=O)CC(=O)\C=C\CC3(C)CCC4=C(C)C(OC(C)=O)=C(C)C(C)=C4O3)CCC2=C1C
3,5,5,Trimethyl-2-hexene	0	Accepted	126.14	0.03	0.004	4.159	-4.391	0.951	C\C=C(/C)CC(C)(C)C
3-Tetradecene	0	Accepted	196.22	0.035	0.002	6.938	-6.69	0.235	CCCCCCCCCC\C=C\CC
6-(4-O-beta-D-Glucosyl-3-methyl-trans-but-2-enyl-amino)-purine	1	Rejected	381.16	0.013	0.081	-0.957	-2.129	0.393	C\C(CO[C@@H]1O[C@H](CO)[C@@H](O)[C@H](O)[C@H]1O)=C/CNC1=NC=NC2=C1NC=N2
6-Hydroxymethylpterin	0	Accepted	193.06	0.952	0.2	-1.941	-2.818	0.572	NC1=NC2=NC=C(CO)N=C2C(=O)N1
7-Octen-4-ol	1	Accepted	128.12	0.065	0.017	2.392	-1.925	0.988	CCCC(O)CCC=C
Benzyladenine 3-O-beta-D-glucoside	1	Accepted	387.15	0.049	0.091	0.037	-2.164	0.466	OC[C@H]1O[C@H]([C@H](O)[C@@H](O)[C@@H]1O)N1C=NC2=C(NCC3=CC=CC=C3)N=CN=C12
Benzyladenine 7-O-beta-D-glucoside	1	Accepted	387.15	0.048	0.085	-0.184	-1.498	0.435	OC[C@H]1OC([C@H](O)[C@@H](O)[C@@H]1O)N1C=NC2=C1C(NCC1=CC=CC=C1)=NC=N2
Phosphatidylethanolamine	0	Accepted	747.52	0.821	0.915	4.623	-1.415	0.003	[H][C@@](CO\C=C/CCCCCCCC\C=C/CCCCCC)(COP(O)(=O)OCCN)OC(=O)CCC\C=C/C\C=C/C\C=C/C\C=C/C\C=C/CC
Coproporphyrin III	1	Rejected	654.27	0.053	0.014	5.105	-2.736	0.001	CC1=C(CCC(O)=O)/C2=C/C3=N/C(=C\C4=C(C)C(CCC(O)=O)=C(N4)/C=C4\N=C(\C=C\1/N\2)C(C)=C4CCC(O)=O)/C(CCC(O)=O)=C3C
Erythroneopterin	0	Accepted	253.08	0.938	0.054	-2.485	-2.719	0.965	NC1=NC2=C(N=C(C=N2)[C@H](O)[C@H](O)CO)C(=O)N1
Galactopinitol	0	Rejected	356.13	0.021	0.107	-2.324	-0.271	0.264	CO[C@@H]1[C@@H](O)[C@@H](O)[C@H](O)[C@H](O[C@H]2O[C@H](CO)[C@H](O)[C@H](O)[C@H]2O)[C@H]1O
Glutamyltyrosine	1	Accepted	310.12	0.136	0.009	-2.09	-1.393	0.129	N[C@@H](CCC(O)=O)C(=O)N[C@@H](CC1=CC=C(O)C=C1)C(O)=O
Hypogeic acid	0	Accepted	254.22	0.05	0.002	5.95	-4.393	0.031	CCCCCCCC\C=C\CCCCCC(O)=O
Isocapric acid	0	Accepted	172.15	0.117	0.005	3.622	-2.985	0.851	CC(C)CCCCCCC(O)=O
Isoflavones	0	Accepted	222.07	0.695	0.336	3.448	-3.95	0.094	O=C1C(=COC2=CC=CC=C12)C1=CC=CC=C1
Isoxanthopterin	0	Accepted	179.04	0.96	0.54	-1.972	-3.042	0.109	NC1=NC(=O)C2=C(N1)NC(=O)C=N2
Kaempferol 3-O-beta-D-2-(glucosyl-rutinoside)	2	Rejected	756.21	0.063	0.676	-0.695	-3.018	0.156	C[C@@H]1O[C@@H](OC[C@H]2O[C@@H](OC3=C(OC4=C(C(O)=CC(O)=C4)C3=O)C3=CC=C(O)C=C3)[C@H](O[C@@H]3O[C@H](CO)[C@@H](O)[C@H](O)[C@H]3O)[C@@H](O)[C@@H]2O)[C@H](O)[C@H](O)[C@H]1O
Kaempferol 3-O-neohesperidoside	1	Rejected	594.16	0.063	0.807	0.27	-4.036	0.058	C[C@@H]1O[C@@H](O[C@@H]2[C@@H](O)[C@H](O)[C@@H](CO)O[C@H]2OC2=C(OC3=CC(O)=CC(O)=C3C2=O)C2=CC=C(O)C=C2)[C@H](O)[C@H](O)[C@H]1O
Kaempferol 3-O-rhamnosyl-rutinoside	1	Rejected	740.22	0.08	0.76	-0.086	-3.96	0.105	C[C@@H]1O[C@@H](O[C@H]2[C@H](C)O[C@@H](OC[C@H]3O[C@@H](OC4=C(OC5=C(C(O)=CC(O)=C5)C4=O)C4=CC=C(O)C=C4)[C@H](O)[C@@H](O)[C@@H]3O)[C@H](O)[C@@H]2O)[C@H](O)[C@H](O)[C@H]1O
Legumelin	0	Accepted	394.14	0.767	0.222	4.573	-4.59	0.115	[H][C@@]12COC3=CC(OC)=C(OC)C=C3[C@]1([H])C(=O)C1=C(O2)C2=C(OC(C)(C)C=C2)C=C1
Lipoxygenase	2	Accepted	229.08	0.936	0.575	2.037	-1.828	0.756	NC1=NN(CC1)C1=CC=CC(=C1)C(F)(F)F
Lumazine	0	Accepted	164.03	0.473	0.125	-0.808	-2.848	0.059	O=C1NC(=O)C2=NC=CNC2=N1
Nitrogenase	0	Accepted	206.04	0.007	0.025	-0.657	-0.573	0.062	[NH2-].[SH-].[SH-].[SH-].[SH-].[SH-].[SH-].[SH-].[SH-].[SH-].[Fe].[Fe].[Fe].[Fe].[Fe].[Fe].[Fe].[Mo].OC(=O)C(O)(CCC([O-])=O)CC([O-])=O
Dihydrozeatin O-beta-D-Glucoside	0	Rejected	383.18	0.018	0.099	-1.307	-1.711	0.789	CC(CCNC1=NC=NC2=C1NC=N2)COC1OC(CO)C(O)C(O)C1O
Octadeca-2,9-dienoic acid	0	Accepted	280.24	0.156	0.004	6.807	-5.103	0.208	CCCCCCCCC=CCCCCCC=CC(O)=O
Phasin	0	Accepted	523.4	0.133	0.504	3.49	-0.175	0.002	CCCCCCCCCCCCCCCCCCOCC(COP([O-])(=O)OCC[N+](C)(C)C)OC
Phosphoglucomutase	0	Accepted	226.11	0.017	0.022	-2.888	-0.791	0.862	NCCC(=O)NC(CC1=CNC=N1)C(O)=O
Pterin	0	Accepted	163.05	0.933	0.362	-1.656	-2.687	0.483	NC1=NC2=NC=CN=C2C(=O)N1
Quercetin 3-O-beta-D-2-glucosyl-rutinoside	3	Rejected	772.21	0.052	0.74	-0.934	-2.975	0.118	C[C@@H]1O[C@@H](OC[C@H]2O[C@@H](OC3=C(OC4=C(C(O)=CC(O)=C4)C3=O)C3=CC(O)=C(O)C=C3)[C@H](O[C@@H]3O[C@H](CO)[C@@H](O)[C@H](O)[C@H]3O)[C@@H](O)[C@@H]2O)[C@H](O)[C@H](O)[C@H]1O
Sequoyitol	0	Accepted	194.08	0.015	0.08	-1.759	-0.14	0.281	CO[C@@H]1[C@@H](O)[C@H](O)[C@H](O)[C@H](O)[C@H]1O
Simiarenol	0	Accepted	426.39	0.026	0.022	7.15	-6.25	0.568	CC(C)C1CCC2C1(C)CCC1(C)C3CC=C4C(CCC(O)C4(C)C)C3(C)CCC21C
Soyasapogenol B-1	0	Accepted	458.38	0.058	0.006	5.204	-4.683	0.405	[H][C@]1(O)CC[C@@]2(C)[C@@]([H])(CC[C@]3(C)[C@]2([H])CC=C2[C@]4([H])CC(C)(C)C[C@@]([H])(O)[C@]4(C)CC[C@@]32C)[C@@]1(C)CO
Soyasaponin A-c	3	Rejected	1420.65	0.03	0.051	0.161	-2.643	0.074	CC1OC(OC2C(O)C(O)C(CO)OC2OC2C(O)C(O)C(OC2OC2CCC3(C)C(CCC4(C)C3CC=C3C5CC(C)(C)C(O)C(OC6OCC(O)C(OC7OC(COC(C)=O)C(OC(C)=O)C(OC(C)=O)C7OC(C)=O)C6O)C5(C)CCC43C)C2(C)CO)C(O)=O)C(O)C(O)C1O
Soyasaponin A-d	3	Rejected	1406.64	0.029	0.05	-0.261	-2.482	0.079	CC(=O)OCC1OC(OC2C(O)COC(OC3C(O)C(C)(C)CC4C5=CCC6C7(C)CCC(OC8OC(C(O)C(O)C8OC8OCC(O)C(O)C8OC8OC(CO)C(O)C(O)C8O)C(O)=O)C(C)(CO)C7CCC6(C)C5(C)CCC34C)C2O)C(OC(C)=O)C(OC(C)=O)C1OC(C)=O
Soyasaponin beta-A	1	Rejected	1038.54	0.088	0.14	2.777	-3.454	0.077	CC1OC(OC2C(O)C(O)COC2OC2C(O)C(O)C(OC2OC2CCC3(C)C(CCC4(C)C3CC=C3C5CC(C)(C)CC(OC6CC(=O)C(O)=C(C)O6)C5(C)CCC43C)C2(C)CO)C(O)=O)C(O)C(O)C1O
Soyasaponin gamma-A	0	Rejected	892.48	0.107	0.27	3.139	-3.995	0.109	CC1=C(O)C(=O)CC(OC2CC(C)(C)CC3C4=CCC5C6(C)CCC(OC7OC(C(O)C(O)C7OC7OCC(O)C(O)C7O)C(O)=O)C(C)(CO)C6CCC5(C)C4(C)CCC23C)O1
Soyasaponin gamma-G	0	Rejected	922.49	0.085	0.209	2.83	-3.725	0.09	CC1=C(O)C(=O)CC(OC2CC(C)(C)CC3C4=CCC5C6(C)CCC(OC7OC(C(O)C(O)C7OC7OC(CO)C(O)C(O)C7O)C(O)=O)C(C)(CO)C6CCC5(C)C4(C)CCC23C)O1
Soybean saponin BG	1	Rejected	910.49	0.032	0.099	2.24	-2.946	0.075	CC1OC(OC2C(O)C(O)COC2OC2C(O)C(O)C(OC2OC2CCC3(C)C(CCC4(C)C3CC=C3C5CC(C)(C)CC(=O)C5(C)CCC43C)C2(C)CO)C(O)=O)C(O)C(O)C1O
Stigmasta-4-22-dien-3-one	0	Accepted	410.35	0.121	0.006	7.477	-6.376	0.326	CC[C@@H](C(C)C)\C=C\[C@@H](C)[C@H]1CC[C@H]2[C@@H]3CCC4=CC(=O)CC[C@]4(C)[C@H]3CC[C@]12C
Udp-glucose	0	Rejected	566.06	0.117	0.07	-3.367	0.206	0.389	OC[C@H]1O[C@H](OP(O)(=O)OP(O)(=O)OC[C@H]2O[C@H]([C@H](O)[C@@H]2O)N2C=CC(=O)NC2=O)[C@H](O)[C@@H](O)[C@@H]1O
Udp-xylose	0	Rejected	536.04	0.132	0.061	-3.107	0.113	0.388	O[C@H]1[C@@H](O)[C@@H](O[C@@H]1COP([O-])(=O)OP([O-])(=O)O[C@H]1OC[C@@H](O)[C@H](O)[C@H]1O)N1C=CC(=O)NC1=O
Uricase	0	Rejected	550.09	0.017	0.032	-2.969	-0.544	0.749	N.OCC1OC(C(O)C1OP(O)(=O)OCC1OC(C(O)C1O)N1C=CC(=O)NC1=O)N1C=CC(=O)NC1=O
Uroporphyrin III	2	Rejected	830.23	0.196	0.012	2.301	-3.413	0	OC(=O)CCC1=C(CC(O)=O)/C2=C/C3=N/C(=C\C4=C(CCC(O)=O)C(CC(O)=O)=C(N4)/C=C4\N=C(\C=C\1/N\2)C(CC(O)=O)=C4CCC(O)=O)/C(CCC(O)=O)=C3CC(O)=O
Verbacose	0	Rejected	828.27	0.003	0.058	-5.967	1.17	0.444	OCC1OC(CO)(OC2OC(COC3OC(COC4OC(COC5OC(CO)C(O)C(O)C5O)C(O)C(O)C4O)C(O)C(O)C3O)C(O)C(O)C2O)C(O)C1O
Verbascose	0	Rejected	828.27	0.01	0.059	-4.043	-0.794	0.533	OC[C@H]1O[C@@](CO)(O[C@H]2O[C@H](CO[C@H]3O[C@H](CO[C@H]4O[C@H](CO[C@H]5O[C@H](CO)[C@H](O)[C@H](O)[C@H]5O)[C@H](O)[C@H](O)[C@H]4O)[C@H](O)[C@H](O)[C@H]3O)[C@@H](O)[C@H](O)[C@H]2O)[C@@H](O)[C@@H]1O
Kaurenoic acid thujanol ester	0	Accepted	438.35	0.407	0.006	7.635	-6.811	0.089	[H][C@@]12CC[C@@H]3C[C@]1(CC3=C)CC[C@]1([H])[C@@](C)(CCC[C@@]21C)C(=O)OC1(CCC(C)=CC1)C(C)C
ent-16b-Kauran-16,19-diol	0	Accepted	306.26	0.209	0.005	3.918	-4.134	0.162	[H][C@@]12CC[C@@H]3C[C@]1(C[C@@]3(C)O)CC[C@]1([H])[C@](C)(CO)CCC[C@@]21C
ent-Kauran-16-beta-ol	0	Accepted	290.26	0.012	0.001	5.501	-5.905	0.074	[H][C@@]12CC[C@@H]3C[C@]1(C[C@@]3(C)O)CC[C@]1([H])C(C)(C)CCC[C@@]21C
(-)-Kaur-16-en-19-oic acid	0	Accepted	302.22	0.451	0.009	4.542	-4.363	0.211	[H][C@@]12C[C@]3(CC1=C)CC[C@]1([H])[C@@](C)(CCC[C@@]1(C)[C@]3([H])CC2)C(O)=O
1,2-Anhydrido-4,5-dihydroniveusin A	1	Accepted	376.15	0.37	0.119	0.982	-2.327	0.596	C\C=C(/C)C(=O)O[C@@H]1C[C@@]2(C)O[C@](O)(C=C2)\C(CO)=C/[C@H]2OC(=O)C(=C)[C@H]12
1-Methoxy-4,5-dihydroniveusin A	2	Accepted	408.18	0.5	0.966	1.058	-2.475	0.357	CO[C@H]1C[C@@]2(O)O[C@]1(C)C[C@@H](OC(=O)C(\C)=C\C)[C@@H]1[C@H](OC(=O)C1=C)\C=C2\CO
15-Hydroxy-3-dehydrodeoxyfruticin	1	Accepted	376.15	0.761	0.01	0.688	-1.786	0.834	CC=C(C)C(=O)OC1CC(C)(O)C=CC(=O)C(CO)=CC2OC(=O)C(=C)C12
23-Dehydro-beta-sitosterol	0	Accepted	412.37	0.029	0.006	6.781	-7.03	0.65	CC\C(C(C)C)=C/C[C@@H](C)C1CCC2C3CC=C4C[C@@H](O)CC[C@]4(C)C3CC[C@]12C
23-Dehydrocampestanol	0	Accepted	400.37	0.013	0.004	6.861	-6.898	0.844	C[C@H](C\C=C(/C)C(C)C)C1CCC2C3CCC4C[C@@H](O)CC[C@]4(C)C3CC[C@]12C
23-Dehydrocholesterol	0	Accepted	384.34	0.031	0.006	6.447	-6.984	0.637	CC(C)\C=C\C[C@@H](C)C1CCC2C3CC=C4C[C@@H](O)CC[C@]4(C)C3CC[C@]12C
24-Ethyl-24(25)-dehydrolathosterol	0	Accepted	412.37	0.078	0.003	7.508	-7.001	0.639	[H][C@@]12CC=C3C4CCC([C@H](C)CCC(CC)=C(C)C)[C@@]4(C)CCC3[C@@]1(C)CC[C@H](O)C2
24-Ethylcholesterol	0	Accepted	414.39	0.016	0.002	7.588	-7.203	0.501	CCC(CC[C@@H](C)[C@H]1CCC2C3CC=C4C[C@@H](O)CC[C@]4(C)C3CC[C@]12C)C(C)C
24-Ethyl-trans-22-dehydrocholesterol	0	Accepted	412.37	0.011	0.007	6.973	-7.102	0.279	CCC(C(C)C)\C=C\[C@@H](C)[C@H]1CCC2C3CC=C4C[C@@H](O)CC[C@]4(C)C3CC[C@]12C
24-Ethyllathosterol	0	Accepted	414.39	0.068	0.005	7.744	-7.241	0.689	[H][C@@]12CC=C3C4CCC([C@H](C)CCC(CC)C(C)C)[C@@]4(C)CCC3[C@@]1(C)CC[C@H](O)C2
24-Methylcholesterol	0	Accepted	400.37	0.021	0.003	7.261	-7.129	0.561	CC(C)C(C)CC[C@@H](C)[C@H]1CCC2C3CC=C4C[C@@H](O)CC[C@]4(C)C3CC[C@]12C
24-Methyl-trans-22-dehydrocholesterol	0	Accepted	398.35	0.013	0.007	6.706	-7.024	0.338	CC(C)C(C)\C=C\[C@@H](C)[C@H]1CCC2C3CC=C4C[C@@H](O)CC[C@]4(C)C3CC[C@]12C
(24Z)-Ethylidenelathosterol	0	Accepted	412.37	0.091	0.006	7.032	-6.899	0.76	C\C=C(\CC[C@@H](C)C1CCC2C3=CC[C@@]4([H])C[C@@H](O)CC[C@]4(C)C3CC[C@]12C)C(C)C
25-Dehydrositostanol	0	Accepted	414.39	0.085	0.004	8.268	-6.827	0.088	[H][C@@]12CC[C@H]([C@H](C)CC[C@@H](CC)C(C)=C)[C@@]1(C)CC[C@@]1([H])[C@@]2([H])CC[C@@]2([H])C[C@@H](O)CC[C@]12C
3-Ethoxyniveusin B	2	Accepted	406.2	0.777	0.813	1.648	-3.414	0.846	[H]C1C[C@@]2(O)O[C@]1(C)C[C@@H](OC(=O)C(\C)=C/C)[C@@H]1[C@@H](OC(=O)C1=C)\C=C2\COCC
3-Ethoxyniveusin A	1	Accepted	424.21	0.84	0.213	1.117	-2.191	0.234	CCO[C@@]12C[C@H](O)[C@@](C)(C[C@@H](OC(=O)C(\C)=C\C)[C@@H]3[C@@H](CC1CO)OC(=O)C3=C)O2
4,5-Dihydro-8,9-dehydrotheaspirone	0	Accepted	208.15	0.771	0.01	2.533	-2.375	0.973	C[C@H]1CC(=O)CC(C)(C)C11CC=C(C)O1
7,24-Stigmastadien-3beta-ol	0	Accepted	412.37	0.042	0.002	7.348	-7.008	0.794	CCC(CC[C@@H](C)C1CCC2C3=CCC4C[C@@H](O)CC[C@]4(C)C3CC[C@]12C)=C(C)C
Argophyllin A	2	Accepted	380.18	0.658	0.118	1.317	-2.009	0.236	C\C=C(\C)C(=O)O[C@@H]1C[C@@]2(C)O[C@@H]2C[C@H](O)C(C)(O)C[C@H]2OC(=O)C(=C)[C@H]12
Calenduladiol	0	Accepted	442.38	0.007	0.001	5.971	-5.458	0.05	CC(=C)[C@@H]1CC[C@@]2(C)[C@H]1[C@H]1CC[C@@H]3[C@@]4(C)CC[C@H](O)C(C)(C)[C@@H]4CC[C@@]3(C)[C@]1(C)C[C@@H]2O
Campest-7-en-beta-ol	0	Accepted	398.35	0.035	0.004	7.228	-6.94	0.983	CC(C)[C@H](C)CC[C@@H](C)C1CCC2C3=CCC4CC(=O)CC[C@]4(C)C3CC[C@]12C
Ciliaric acid	0	Accepted	318.22	0.046	0.019	2.939	-4.005	0.846	CC12CC34CC1C2CC3C1(C)CCCC(C)(C1CC4O)C(O)=O
delta-Cadinol	0	Accepted	222.2	0.126	0.012	4.338	-4.468	0.469	[H][C@@]1(CC=C(C)C2([H])CCC(C)(O)CC12[H])C(C)C
Gibberellins	0	Accepted	346.14	0.205	0.01	0.475	-3.172	0.143	[H][C@@]12CC[C@]3(O)C[C@]1(CC3=C)[C@@H](C(O)=O)[C@]1([H])[C@]3(C)[C@@H](O)C=C[C@@]21OC3=O
Niveusin B	1	Accepted	378.17	0.724	0.55	1.08	-2.549	0.783	[H]C1C[C@@]2(O)O[C@]1(C)C[C@@H](OC(=O)C(\C)=C/C)[C@@H]1[C@@H](OC(=O)C1=C)\C=C2\CO
Pectolinarigenin	1	Accepted	314.08	0.165	0.575	3.505	-3.751	0.007	COC1=CC=C(C=C1)C1=CC(=O)C2=C(O1)C=C(O)C(OC)=C2O
Propiovanillone	1	Accepted	180.08	0.39	0.207	1.983	-2.39	0.555	CCC(=O)C1=CC(OC)=C(O)C=C1
Hemin	2	Rejected	560.24	0.472	0.139	6.298	-2.942	0.001	[Cl-].[Fe+3].CC1=C(CCC(O)=O)/C2=C/C3=N/C(=C\C4=C(C)C(C=C)=C([N-]4)/C=C4\N=C(\C=C\1/[N-]\2)C(C=C)=C4C)/C(C)=C3CCC(O)=O
Isorhamnetin 3-beta-D-glucoside	1	Rejected	478.11	0.03	0.789	0.559	-4.105	0.029	COC1=C(O)C=CC(=C1)C1=C(O[C@@H]2O[C@H](CO)[C@@H](O)[C@H](O)[C@H]2O)C(=O)C2=C(O)C=C(O)C=C2O1
1,4-Benzoquinone	2	Accepted	108.02	0.775	0.131	0.281	-1.184	0.98	O=C1C=CC(=O)C=C1
alpha-Allocryptopine	1	Accepted	369.16	0.669	0.083	2.911	-4.098	0.994	COC1=C(OC)C2=C(CC(=O)C3=C(CCN(C)C2)C=C2OCOC2=C3)C=C1
beta-Glucan
Calmodulin	1	Accepted	173.12	0.039	0.244	-1.736	-0.262	0.444	NCCCC[C@H](NC=O)C(N)=O
Citrinin	1	Accepted	250.08	0.956	0.412	3.728	-2.754	0.044	C[C@@H]1OC=C2C(=O)C(=C(O)O)C(=O)C(C)=C2[C@H]1C
Diethylamine	0	Accepted	73.09	0.043	0.007	0.696	0.996	0.527	CCNCC
Feruloylquinic acid	3	Accepted	368.11	0.068	0.041	-0.132	-1.317	0.859	COC1=CC(C=CC(=O)OC(=O)C2(O)CC(O)C(O)C(O)C2)=CC=C1O
Oryzanol	2	Rejected	602.43	0.035	0.004	8.977	-6.965	0.026	COC1=C(O)C=CC(\C=C\C(=O)O[C@H]2CC[C@]34C[C@]33CC[C@]5(C)[C@H](CC[C@@]5(C)C3CCC4C2(C)C)C(C)CCC=C(C)C)=C1
Satiomem	0	Accepted	290.12	0.047	0.011	2.624	-2.571	0.989	CN(C)CCOC(C1=CC=C(Cl)C=C1)C1=CC=CC=N1
Anisatin	1	Accepted	328.12	0.225	0.861	0.246	-3.538	0.679	C[C@@H]1C[C@@H](O)[C@]2(O)[C@]3(COC3=O)[C@@](C)(O)[C@H]3C[C@@]12[C@@H](O)C(=O)O3
Calamene	1	Accepted	301.06	0.199	0.12	-1.704	-1.914	0.894	NC1=NC=NC2=C1N=C(Cl)N2C1OC(CO)C(O)C1O
Longifolene	0	Accepted	204.19	0.072	0.03	5.175	-6.606	0.816	CC12CCCC(C)(C)C3C(CCC13)C2=C
Cyanidin 3-(caffeoyl-sophoroside) 5-glucoside	3	Rejected	935.25	0.055	0.213	-0.113	-2.911	0.176	OC[C@H]1O[C@@H](OC2=CC(O)=CC3=C2C=C(O[C@@H]2O[C@H](CO)[C@@H](O)[C@H](O)[C@H]2O[C@@H]2O[C@H](COC(=O)\C=C\C4=CC=C(O)C(O)=C4)[C@@H](O)[C@H](O)[C@H]2O)C(=[O+]3)C2=CC(O)=C(O)C=C2)[C@H](O)[C@@H](O)[C@@H]1O
Cyanidin 3-dicaffeoyl-sophoroside 5-glucoside	4	Rejected	1097.28	0.068	0.292	1.485	-3.686	0.07	OC[C@H]1O[C@@H](OC2=C3C=C(O[C@@H]4O[C@H](COC(=O)\C=C\C5=CC=C(O)C(O)=C5)[C@@H](O)[C@H](O)[C@H]4O[C@@H]4O[C@H](COC(=O)\C=C\C5=CC=C(O)C(O)=C5)[C@@H](O)[C@H](O)[C@H]4O)C(=[O+]C3=CC(O)=C2)C2=CC(O)=C(O)C=C2)[C@H](O)[C@@H](O)[C@@H]1O
1,2,3-Trimethylbenzene	0	Accepted	120.09	0.686	0.188	3.664	-3.478	0.82	CC1=CC=CC(C)=C1C
1,2,4-Trimethylbenzene	0	Accepted	120.09	0.623	0.09	3.673	-3.543	0.936	CC1=CC(C)=C(C)C=C1
1,3-Dimethylbenzene	0	Accepted	106.08	0.461	0.033	3.047	-2.9	0.968	CC1=CC(C)=CC=C1
1,2-Dimethylbenzene	0	Accepted	106.08	0.702	0.055	3.115	-2.905	0.844	CC1=CC=CC=C1C
1,4-Dimethylbenzene	0	Accepted	106.08	0.59	0.033	3.118	-3.011	0.93	CC1=CC=C(C)C=C1
2,2-Dimethyldecan-1-ol	0	Accepted	186.2	0.05	0.006	4.669	-4.15	0.811	CCCCCCCCC(C)(C)CO
2,6,10-trimethyldodecane	0	Accepted	212.25	0.045	0.005	7.095	-6.799	0.453	CCC(C)CCCC(C)CCCC(C)C
2-Hydroxy-4-methoxybenzaldehyde	2	Accepted	152.05	0.257	0.432	1.798	-1.855	0.721	COC1=CC(O)=C(C=O)C=C1
3-Methyltridecane	0	Accepted	198.23	0.043	0.006	7.272	-6.791	0.299	CCCCCCCCCCC(C)CC
Behnic acid	0	Accepted	340.33	0.035	0.005	9.198	-6.555	0.01	CCCCCCCCCCCCCCCCCCCCCC(O)=O
Eicosadienoic acid	1	Accepted	308.27	0.168	0.021	7.382	-5.797	0.077	[H]\C(CCCCCCCCCCCCCCC)=C(\[H])/C(/[H])=C(\[H])C(O)=O
Heptadecadienoic acid	1	Accepted	266.22	0.32	0.023	6.129	-4.725	0.225	CCCCCCCCCCCCC=CC=CC(O)=O
Hexadecadienoic acid	1	Accepted	252.21	0.401	0.022	5.639	-4.331	0.325	CCCCCCCCCCCC=CC=CC(O)=O
Naphthalen-1-ol	1	Accepted	144.06	0.792	0.564	2.797	-2.389	0.544	OC1=C2C=CC=CC2=CC=C1
Pentadecadienoic acid	1	Accepted	238.19	0.483	0.022	5.145	-3.959	0.441	CCCCCCCCCCC=CC=CC(O)=O
Plumbagin	3	Accepted	188.05	0.761	0.908	2.342	-3.142	0.151	CC1=CC(=O)C2=C(C=CC=C2O)C1=O
Sakuranin	1	Accepted	448.14	0.822	0.418	-0.068	-3.591	0.585	COC1=CC(OC2OC(CO)C(O)C(O)C2O)=C2C(=O)CC(OC2=C1)C1=CC=C(O)C=C1
Tetradecenoic acid	0	Accepted	226.19	0.205	0.005	5.515	-4.015	0.553	CCCCCCCCCCCC=CC(O)=O
delta-7-Campesterol	0	Accepted	400.37	0.035	0.005	7.395	-7.226	0.779	CC(C)[C@H](C)CC[C@@H](C)C1CCC2C3=CCC4C[C@@H](O)CC[C@]4(C)C3CC[C@]12C
alpha-Amorphene	0	Accepted	204.19	0.47	0.035	6.266	-5.104	0.219	CC(C)[C@H]1CC=C(C)[C@H]2CCC(C)=C[C@@H]12
alpha-Bourbonene	0	Accepted	204.19	0.088	0.017	5.026	-5.655	0.592	CC(C)C1CCC2(C)C3CC=C(C)C3C12
Artecanin	3	Accepted	278.12	0.457	0.093	1.367	-3.63	0.857	C[C@@]12O[C@@H]1[C@@H]1O[C@]11[C@H]2[C@H]2OC(=O)C(=C)[C@@H]2CC[C@@]1(C)O
Artemorin	1	Accepted	248.14	0.349	0.499	1.827	-3.159	0.702	C\C1=C/[C@H]2OC(=O)C(=C)[C@@H]2CCC(=C)[C@H](O)CC1
cis-3-Hexanol	0	Accepted	100.09	0.359	0.032	0.671	-1.296	0.997	CC\C=C/CCO
Dihydroparthenolide	1	Accepted	250.16	0.08	0.027	3.521	-4.272	0.975	CC1C2C\C(C)=C\CCCC3(C)OC3C2OC1=O
Eremanthin	1	Accepted	230.13	0.56	0.019	3.516	-3.458	0.093	CC1=CC[C@@H]2[C@H](OC(=O)C2=C)[C@@H]2[C@H]1CCC2=C
Kaempferol 3-O-alpha-L-galactoside	1	Rejected	448.1	0.083	0.811	0.596	-4.125	0.026	OC[C@@H]1O[C@@H](OC2=C(OC3=C(C(O)=CC(O)=C3)C2=O)C2=CC=C(O)C=C2)[C@@H](O)[C@H](O)[C@@H]1O
Laurenoniolide	1	Accepted	290.15	0.071	0.081	2.234	-3.487	0.459	[H]\C1=C(C)/C[C@]2([H])OC(=O)C(=C)[C@@]2([H])[C@]([H])(OC(C)=O)\C([H])=C(C)\CC1
N-Decane	0	Accepted	142.17	0.058	0.008	5.668	-5.72	0.808	CCCCCCCCCC
Parthenolide	2	Accepted	248.14	0.448	0.153	2.964	-3.95	0.423	C\C1=C/CC[C@@]2(C)O[C@H]2[C@H]2OC(=O)C(=C)[C@@H]2CC1
Phenylhydrazine	2	Accepted	108.07	0.465	0.699	1.066	-0.1	0.981	NNC1=CC=CC=C1
Reynosin	1	Accepted	248.14	0.201	0.03	1.773	-3.166	0.992	CC12CCC3C(OC(=O)C3=C)C1C(=C)CCC2O
Ridentin B	1	Accepted	264.14	0.374	0.015	0.695	-3.034	0.962	CC12CCC3C(OC(=O)C3=C)C1C(=C)C(O)CC2O
Rothin B	1	Accepted	264.14	0.589	0.106	0.82	-2.272	0.99	CC12CCCC(=C)C1(O)C1OC(=O)C(=C)C1C(O)C2
Santamarin	1	Accepted	248.14	0.382	0.215	2.66	-3.087	0.586	CC1=CC[C@@H](O)[C@]2(C)CC[C@@H]3[C@H](OC(=O)C3=C)[C@@H]12
Verlotorin	1	Accepted	264.14	0.65	0.705	1.456	-2.958	0.945	C\C1=C/C2OC(=O)C(=C)C2CCC(=C)C(CC1)OO
Viscidulin C	1	Accepted	264.14	0.132	0.026	1.38	-2.231	0.986	CC1C2C(OC1=O)C1C(CC3OC13C)C(=C)CC2O
Zaluzanin D	1	Accepted	288.14	0.662	0.087	1.969	-3.139	0.936	CC(=O)O[C@H]1C[C@H]2[C@@H]([C@H]3OC(=O)C(=C)[C@@H]3CCC2=C)C1=C
Kaempferol 3-O-alpha-L-rhamnoside-beta-D-glucosyl	1	Rejected	594.16	0.092	0.805	0.2	-3.844	0.051	C[C@@H]1O[C@@H](OC[C@H]2O[C@@H](OC3=C(OC4=C(C(O)=CC(O)=C4)C3=O)C3=CC=C(O)C=C3)[C@H](O)[C@@H](O)[C@@H]2O)[C@H](O)[C@H](O)[C@H]1O
Kaempferol 3-rutinosyl 7-O-alpha-L-rhamnoside	1	Rejected	740.22	0.085	0.772	-0.173	-3.915	0.117	C[C@@H]1O[C@@H](OC[C@H]2O[C@@H](OC3=C(OC4=C(C(O)=CC(O[C@@H]5O[C@@H](C)[C@H](O)[C@@H](O)[C@H]5O)=C4)C3=O)C3=CC=C(O)C=C3)[C@H](O)[C@@H](O)[C@@H]2O)[C@H](O)[C@H](O)[C@H]1O
Kaempferol 3-rutinosyl 7-O-beta-glucoside	1	Rejected	756.21	0.077	0.64	-0.723	-3.256	0.189	C[C@@H]1O[C@@H](OC[C@H]2O[C@@H](OC3=C(OC4=C(C(O)=CC(O[C@@H]5O[C@H](CO)[C@@H](O)[C@H](O)[C@H]5O)=C4)C3=O)C3=CC=C(O)C=C3)[C@H](O)[C@@H](O)[C@@H]2O)[C@H](O)[C@H](O)[C@H]1O
Kaempferol 7-O-beta-D-glucoside-O-alpha-L-rhamnosyl	1	Rejected	594.16	0.128	0.825	0.318	-3.653	0.054	C[C@@H]1O[C@@H](OC2=CC3=C(C(O)=C2)C(=O)C(O)=C(O3)C2=CC=C(O)C=C2)[C@H](O)[C@H](O)[C@H]1O[C@@H]1O[C@H](CO)[C@@H](O)[C@H](O)[C@H]1O
Variabilin	1	Accepted	398.25	0.246	0.002	5.87	-4.52	0.027	C[C@@H](CCC\C(C)=C\CC\C(C)=C\CCC1=COC=C1)\C=C1/OC(O)=C(C)C1=O
4-Octanone	1	Accepted	128.12	0.045	0.021	2.33	-1.721	0.997	CCCCC(=O)CCC
beta-Chamigrene	0	Accepted	204.19	0.849	0.011	5.511	-5.608	0.236	CC1=CCC2(CC1)C(=C)CCCC2(C)C
Cuparene	0	Accepted	202.17	0.109	0.015	4.973	-5.842	0.168	CC1=CC=C(C=C1)[C@]1(C)CCCC1(C)C
Ligusticide	1	Accepted	190.1	0.934	0.019	4.046	-3.482	0.267	[H]\C(CCC)=C1\OC(=O)C2=C1CCC=C2
Pretazettine	2	Accepted	331.14	0.731	0.558	1.033	-2.518	0.99	CO[C@H]1C[C@@H]2N(C)C[C@@H]3O[C@@H](O)C4=CC5=C(OCO5)C=C4[C@@]23C=C1
Thujopsene	0	Accepted	204.19	0.346	0.032	5.388	-5.805	0.41	CC1=CCC2(C)CCCC(C)(C)C22CC12
Validene 4,5-dihydrophthalide	1	Accepted	204.12	0.921	0.02	4.413	-3.909	0.301	CCCC\C=C1/OC(=O)C2=C1CCC=C2
cis-12-Oxophytodienoic acid	1	Accepted	292.2	0.509	0.011	3.879	-3.842	0.01	[H]\C(CC)=C(/[H])CC1C(CCCCCCCC(O)=O)C=CC1=O
Cyanidin 3-glucosyl-rutinoside	2	Rejected	757.22	0.08	0.532	-0.703	-2.157	0.107	C[C@@H]1O[C@@H](OC[C@H]2O[C@@H](OC[C@H]3O[C@@H](OC4=CC5=C(C=C(O)C=C5O)[O+]=C4C4=CC(O)=C(O)C=C4)[C@H](O)[C@@H](O)[C@@H]3O)[C@H](O)[C@@H](O)[C@@H]2O)[C@H](O)[C@H](O)[C@H]1O
Cyanidin 3-triglucoside	2	Rejected	773.21	0.07	0.278	-1.52	-1.494	0.18	OC[C@H]1O[C@@H](OC[C@H]2O[C@@H](OC[C@H]3O[C@@H](OC4=CC5=C(C=C(O)C=C5O)[O+]=C4C4=CC(O)=C(O)C=C4)[C@H](O)[C@@H](O)[C@@H]3O)[C@H](O)[C@@H](O)[C@@H]2O)[C@H](O)[C@@H](O)[C@@H]1O
D-Xylopyranose	0	Accepted	150.05	0.024	0.318	-1.97	-0.008	0.343	O[C@@H]1COC(O)[C@H](O)[C@H]1O
Heteroside	0	Rejected	780.47	0.039	0.083	3.67	-3.497	0.038	CC1(C)CC[C@@]2(CC[C@]3(C)C(=CC[C@@H]4[C@@]5(C)CC[C@H](OC6O[C@H](CO)[C@@H](O)[C@H](O)[C@H]6OC6O[C@H](CO)[C@@H](O)[C@H](O)[C@H]6O)C(C)(C)[C@@H]5CC[C@@]34C)[C@@H]2C1)C(O)=O
Lignans	1	Accepted	414.13	0.122	0.042	1.615	-3.406	0.146	COC1=CC(=CC(OC)=C1OC)[C@H]1[C@H]2C(COC2=O)[C@@H](O)C2=CC3=C(OCO3)C=C12
Lucenin 1	2	Rejected	580.14	0.028	0.729	-0.987	-2.875	0.16	OCC1OC(C(O)C(O)C1O)C1=C2OC(=CC(=O)C2=C(O)C(C2OCC(O)C(O)C2O)=C1O)C1=CC(O)=C(O)C=C1
Mannuronic acid	3	Accepted	194.04	0.002	0.028	-2.174	-0.15	0.799	[H][C@@](O)(C=O)[C@@]([H])(O)[C@]([H])(O)[C@]([H])(O)C(O)=O
Oleoresin	3	Accepted	584.42	0.344	0.083	4.884	-5.269	0.013	COC1=C(O)C=CC(CNC(=O)CCCC\C=C\C(C)C)=C1.CC(C)=CCC\C(C)=C\C(=O)\C=C\C(\C)=C\C=C\C(\C)=C\C=C\C=C(/C)\C=C\C=C(/C)\C=C\C1=C(C)CC(O)CC1(C)C.C\C(\C=C\C=C(/C)\C=C\C(=O)C1C(C)=CCCC1(C)C)=C/C=C/C=C(\C)/C=C/C=C(\C)/C=C/C1=C(C)CC(O)CC1(C)C.C\C(\C=C\C=C(/C)\C=C\C(=O)C1=C(C)CCCC1(C)C)=C/C=C/C=C(\C)/C=C/C=C(\C)/C=C/C1=C(C)CC(O)CC1(C)C.C\C(\C=C\C=C(/C)\C=C\C(=O)C1(C)CC(O)CC1(C)C)=C/C=C/C=C(\C)/C=C/C=C(\C)/C=C/C…
Pentoses	1	Accepted	150.05	0.008	0.061	-2.039	-0.108	0.416	OCC(O)C(O)C(O)C=O
2-Octene	0	Accepted	112.13	0.118	0.014	4.186	-3.916	0.932	CCCCCC=CC
Carbonate	0	Accepted	62	0.031	0.008	-0.467	0.502	0.723	[O-]C([O-])=O
Mangiferol	3	Rejected	422.08	0.023	0.717	0.136	-3.514	0.019	[H][C@]1(CO)O[C@@]([H])(C2=C(O)C3=C(OC4=C(C=C(O)C(O)=C4)C3=O)C=C2O)[C@]([H])(O)[C@@]([H])(O)[C@]1([H])O
6-Methoxy-7-methylquercetin	2	Accepted	346.07	0.046	0.601	2.395	-3.667	0.003	COC1=CC2=C(C(O)=C1OC)C(=O)C(O)=C(O2)C1=CC(O)=C(O)C=C1
6-Hydroxyluteolin 7-glucoside	2	Rejected	464.1	0.067	0.771	0.083	-3.299	0.011	OC[C@H]1O[C@@H](OC2=CC3=C(C(=O)C=C(O3)C3=CC(O)=C(O)C=C3)C(O)=C2O)[C@H](O)[C@@H](O)[C@@H]1O
Anthecotulide	2	Accepted	248.14	0.824	0.234	3.005	-3.159	0.12	CC(C)=CC(=O)C\C(C)=C\CC1COC(=O)C1=C
Apigenin 7-(6''-O-acetyl)-glucoside	1	Accepted	474.12	0.594	0.689	2.003	-4.306	0.03	CC(=O)OC[C@H]1O[C@@H](OC2=CC3=C(C(O)=C2)C(=O)C=C(O3)C2=CC=C(O)C=C2)[C@H](O)[C@@H](O)[C@@H]1O
Apigenin 7-glucoside-(3'',4'')-diacetate	2	Rejected	516.13	0.048	0.495	2.034	-4.307	0.032	CC(=O)O[C@@H]1[C@@H](CO)O[C@@H](OC2=CC3=C(C(O)=C2)C(=O)C=C(O3)C2=CC=C(O)C=C2)[C@H](O)[C@H]1OC(C)=O
Chamaviolin	1	Accepted	198.1	0.55	0.533	4.225	-5.451	0.612	CCC1=CC2=C(C=O)C=CC2=C(C)C=C1
Chrysosplenetin	1	Accepted	374.1	0.036	0.399	2.782	-4.098	0.006	COC1=C(O)C=CC(=C1)C1=C(OC)C(=O)C2=C(O)C(OC)=C(OC)C=C2O1
Chrysosplenol	2	Accepted	360.08	0.042	0.484	2.528	-3.889	0.004	COC1=C(O)C=CC(=C1)C1=C(OC)C(=O)C2=C(O)C(O)=C(OC)C=C2O1
1,2-Humulene epoxide	1	Accepted	220.18	0.041	0.009	4.609	-5.39	0.187	C\C1=C/CC(C)(C)\C=C\CC2(C)OC2CC1
Cadina-1,4-diene	0	Accepted	204.19	0.694	0.022	5.413	-5.537	0.481	CC(C)C1CC[C@H](C)C2=CCC(C)=CC12
Dehydroabietane	0	Accepted	270.23	0.022	0.018	6.659	-6.892	0.179	CC(C)C1=CC=C2C(CCC3C(C)(C)CCCC23C)=C1
Eugenyl glucoside	1	Accepted	326.14	0.403	0.259	0.57	-1.731	0.321	[H][C@]1(CO)O[C@@]([H])(OC2=C(OC)C=C(CC=C)C=C2)[C@]([H])(O)[C@@]([H])(O)[C@]1([H])O
Isogeranial	1	Accepted	152.12	0.358	0.071	2.447	-2.829	0.979	CC(C)=CC\C=C(/C)CC=O
Methylgeraniate	1	Accepted	182.13	0.074	0.003	3.145	-2.798	0.971	COC(=O)\C=C(/C)CCC=C(C)C
Neric acid	0	Accepted	168.12	0.734	0.119	3.337	-2.777	0.184	CC(C)=CCC\C(C)=C/C(O)=O
Pulegol	0	Accepted	154.14	0.451	0.009	2.695	-2.584	0.955	CC1CCC(C(O)C1)=C(C)C
Rhamnocitrin	1	Accepted	300.06	0.099	0.655	3.318	-3.663	0.009	COC1=CC(O)=C2C(=O)C(O)=C(OC2=C1)C1=CC=C(O)C=C1
trans-Rose oxide	0	Accepted	154.14	0.403	0.338	3.377	-2.927	0.725	CC1CCOC(C1)C=C(C)C
(+)-Neomenthyl acetate	0	Accepted	198.16	0.452	0.123	3.861	-3.234	0.443	CC(C)[C@@H]1CC[C@@H](C)C[C@@H]1OC(C)=O
2-N-Amylfuran	1	Accepted	138.1	0.508	0.031	3.787	-3.658	0.611	CCCCCC1=CC=CO1
Bourbonene	0	Accepted	204.19	0.157	0.01	4.692	-4.993	0.256	[H][C@]12C(=C)CC[C@@]1([H])[C@]1(C)CC[C@@]([H])(C(C)C)[C@]21[H]
Melissic acid	0	Accepted	466.47	0.018	0.005	12.704	-7.266	0.002	CCCCCCCCCCCCCCCCCCCCCCCCCCCCCCC(O)=O
Myrtenyl methyl ether	0	Accepted	166.14	0.772	0.003	3.17	-3.735	0.975	COCC1=CCC2CC1C2(C)C
Piperitone oxide	1	Accepted	168.12	0.115	0.223	2.105	-2.069	0.893	CC(C)C1CCC2(C)OC2C1=O
(+)-1,2-Epoxyneomenthyl acetate	1	Accepted	212.14	0.446	0.108	2.75	-2.612	0.336	CC(C)[C@@H]1CC[C@]2(C)OC2[C@@H]1OC(C)=O
(+)-8-Acetoxycarvone	0	Accepted	208.11	0.898	0.321	1.66	-2.247	0.982	CC(=O)O[C@@]1(CC=C(C)C(=O)C1)C(C)=C
(+)-Menthyl acetate	0	Accepted	198.16	0.601	0.149	3.812	-3.265	0.354	CC(C)[C@H]1CC[C@H](C)C[C@@H]1OC(C)=O
(-)-Linalyl acetate	1	Accepted	196.15	0.269	0.004	3.352	-3.531	0.924	CC(C)=CCC[C@@](C)(OC(C)=O)C=C
(-)-Piperitenone oxide	2	Accepted	166.1	0.458	0.669	1.97	-2.843	0.18	CC(C)=C1CC[C@@]2(C)O[C@@H]2C1=O
1-p-Menthen-3-one	4	Accepted	332.15	0.852	0.964	4.604	-6.204	0.569	CC(C)C1CCC(C)=C\C1=N/NC1=C(C=C(C=C1)[N+]([O-])=O)[N+]([O-])=O
Acacetin 7-glucoside	1	Accepted	446.12	0.373	0.758	1.854	-4.035	0.063	[H][C@]1(CO)O[C@@]([H])(OC2=CC(O)=C3C(=O)C=C(OC3=C2)C2=CC=C(OC)C=C2)[C@]([H])(O)[C@@]([H])(O)[C@]1([H])O
Menthofurolactone	1	Accepted	166.1	0.785	0.021	3.146	-2.673	0.651	CC1C(=O)OC2=C1CCC(C)C2
p-Menthan-trans-2,5-diol	0	Accepted	172.15	0.059	0.011	1.871	-1.125	0.568	CC(C)[C@H]1CC(O)[C@H](C)CC1O
4-Hydroxypiperitone	0	Accepted	170.13	0.249	0.041	1.216	-1.48	0.975	CC(C)C1CC(O)C(C)CC1=O
5-Hydroxycarvone	2	Accepted	166.1	0.608	0.029	2.578	-1.696	0.528	CC(=C)C1CC=C(C)C(=O)C1O
Cadinol	0	Accepted	222.2	0.146	0.015	4.393	-4.558	0.573	CC(C)[C@@H]1CC[C@@](C)(O)C2CCC(C)=CC12
Epimuurolene	0	Accepted	204.19	0.362	0.02	5.517	-5.176	0.347	[H][C@@]12CCC(C)=C[C@@]1([H])[C@@H](CCC2=C)C(C)C
Lavandulyl butyrate	0	Accepted	224.18	0.334	0.009	4.594	-4.464	0.98	CCCC(=O)OCC(CC=C(C)C)C(C)=C
1-Menthol acetate	0	Accepted	198.16	0.093	0.005	3.749	-3.72	0.882	CC(C)C1CCC(C)(CC1)OC(C)=O
p-Menth-trans-2,8-dien-1-ol	0	Accepted	152.12	0.673	0.011	2.365	-1.736	0.998	CC(=C)C1CCC(C)(O)C=C1
Rotundifoline	3	Accepted	400.2	0.832	0.136	2.801	-3.569	0.997	CC[C@H]1CN2CCC3(C2C[C@@H]1\C(=C/OC)C(=O)OC)C(=O)NC1=C3C(O)=CC=C1
trans-Carvyl formate	2	Accepted	180.12	0.906	0.163	3.316	-2.713	0.992	[H][C@@]1(CC=C(C)[C@@]([H])(C1)OC=O)C(C)=C
trans-Jasmone	1	Accepted	164.12	0.463	0.007	3.121	-3.975	0.519	CC\C=C\CC1=C(C)CCC1=O
(-)-Mintlactone	3	Accepted	306.02	0.918	0.01	2.33	-3.973	0.037	OC1=C(C=O)C=C(C=C1)S(=O)(=O)C1=CC(C=O)=C(O)C=C1
1-Menthyl-beta-D-glucoside	0	Accepted	318.2	0.113	0.212	1.537	-1.786	0.077	CC(C)[C@@H]1CC[C@@H](C)C[C@H]1O[C@@H]1O[C@H](CO)[C@@H](O)[C@H](O)[C@H]1O
2-Methylbut-2-en-1-al	2	Accepted	84.06	0.167	0.791	0.596	-0.758	0.996	[H]\C(C)=C(\C)C=O
3-Phenyl-4-propylpyridine	0	Accepted	197.12	0.141	0.1	4.09	-3.121	0.887	CCCC1=CC=NC=C1C1=CC=CC=C1
4-Hydroxy-4-methylcyclohex-2-en-1-one	1	Accepted	126.07	0.886	0.046	0.152	-0.074	0.996	CC1(O)CCC(=O)C=C1
5-Methylheptan-3-one	1	Accepted	128.12	0.039	0.009	2.177	-1.678	0.998	CCC(C)CC(=O)CC
beta-Ylangene	0	Accepted	204.19	0.087	0.013	4.655	-5.443	0.357	[H][C@]12C3C(=C)CC[C@@]1([H])[C@]3(C)CC[C@H]2C(C)C
cis-p-Menth-1-en-3-ol	0	Accepted	154.14	0.213	0.029	2.654	-1.971	0.52	CC(C)[C@@H]1CCC(C)=C[C@@H]1O
cis-Sabinol	0	Accepted	152.12	0.916	0.029	1.543	-2.016	0.876	CC(C)[C@@]12C[C@@H]1C(=C)[C@H](O)C2
Gardenin D	1	Accepted	374.1	0.044	0.413	2.892	-4	0.005	COC1=C(O)C=C(C=C1)C1=CC(=O)C2=C(O)C(OC)=C(OC)C(OC)=C2O1
Isomenthol acetate	0	Accepted	198.16	0.545	0.122	3.531	-2.953	0.427	CC(C)[C@@H]1CC[C@H](C)C[C@H]1OC(C)=O
Lithospermic acid	3	Rejected	538.11	0.215	0.019	1.878	-4.093	0.018	OC(=O)C(CC1=CC(O)=C(O)C=C1)OC(=O)\C=C/C1=C2C(C(OC2=C(O)C=C1)C1=CC=C(O)C(O)=C1)C(O)=O
Neoisomenthol acetate	0	Accepted	198.16	0.112	0.012	3.78	-3.421	0.28	CC(C)[C@H]1CC[C@@H](C)C[C@H]1OC(C)=O
p-Menthane	0	Accepted	140.16	0.056	0.009	4.763	-5.129	0.685	CC(C)C1CCC(C)CC1
Salvigenin	1	Accepted	328.09	0.105	0.595	3.532	-4.306	0.044	COC1=CC=C(C=C1)C1=CC(=O)C2=C(O)C(OC)=C(OC)C=C2O1
5alpha-Stigmasta-7,22,25-trien-3beta-ol	0	Accepted	410.35	0.034	0.004	6.946	-7.04	0.258	[H][C@@]12CC=C3C4CCC([C@H](C)\C=C\[C@@H](CC)C(C)=C)[C@@]4(C)CCC3[C@@]1(C)CC[C@H](O)C2
5alpha-Stigmasta-7,25-dien-3beta-ol	0	Accepted	412.37	0.083	0.004	7.475	-7.169	0.472	[H][C@@]12CC=C3C4CCC([C@H](C)CC[C@@H](CC)C(C)=C)[C@@]4(C)CCC3[C@@]1(C)CC[C@H](O)C2
Calceolarioside E	4	Rejected	610.19	0.077	0.324	-0.316	-1.875	0.319	OCC1OC(OCCC2=CC(O)=C(O)C=C2)C(O)C(OC2OCC(O)(CO)C2O)C1OC(=O)\C=C/C1=CC(O)=C(O)C=C1
Charantin	0	Accepted	383.25	0.118	0.052	4.332	-4.183	0.839	OC(=O)C(O)=O.CCN(CC)CCOC(=O)C(CC1CCCO1)CC1=CC=CC2=CC=CC=C12
Cucurbitacin K	1	Accepted	532.3	0.191	0.046	1.898	-3.835	0.959	CC(C)(O)C(O)CC(=O)C(C)(O)C1C(O)CC2(C)C3CC=C4C(CC(=O)C(=O)C4(C)C)C3(C)C(=O)CC12C.CC(C)(O)C(O)CC(=O)C(C)(O)C1C(O)CC2(C)C3CC=C4C(C=C(O)C(=O)C4(C)C)C3(C)C(=O)CC12C
Elasterol	0	Accepted	410.35	0.421	0.003	7.845	-6.732	0.152	[H][C@@](C)(CC[C@@]([H])(CC)C(C)=C)C1=CC[C@@]2([H])C3=CC[C@@]4([H])C[C@@]([H])(O)CC[C@]4(C)[C@@]3([H])CC[C@]12C
Momordicine III	3	Rejected	648.39	0.081	0.12	1.928	-3.661	0.662	CC(CC(OC1OC(CO)C(O)C(O)C1O)C(=O)C(C)=C)C1CCC2(C)C3C(O)C=C4C(CCC(O)C4(C)C)C3(CCC12C)C=O
Momordin	2	Accepted	223.06	0.102	0.076	-0.32	0.316	0.978	CNC(=O)\C=C(/C)OP(=O)(OC)OC
Momordin B	0	Rejected	632.39	0.099	0.029	5.236	-3.623	0.095	[H][C@@]12CC(C)(C)CC[C@@]1(CC[C@]1(C)C2=CC[C@]2([H])[C@@]3(C)CC[C@H](O[C@@H]4O[C@@H]([C@@H](O)[C@H](O)[C@H]4O)C(O)=O)C(C)(C)[C@]3([H])CC[C@@]12C)C(O)=O
Mutachrome	1	Rejected	552.43	0.049	0.088	7.162	-4.683	0.002	C\C(\C=C\C=C(/C)\C=C\C1=C(C)CCCC1(C)C)=C/C=C/C=C(\C)/C=C/C=C(\C)C1OC2(C)CCCC(C)(C)C2=C1
1-Pentadecanol	0	Accepted	228.25	0.048	0.006	6.298	-6.236	0.218	CCCCCCCCCCCCCCCO
(24R)-4alpha,14alpha,24-trimethyl-5alpha-cholesta-8,25(27)-dien-3beta-ol	0	Accepted	426.39	0.268	0.023	7.274	-6.648	0.131	[H][C@@]12CCC3=C(CC[C@]4(C)C(CC[C@@]34C)[C@H](C)CC[C@H](C)C(C)=C)[C@@]1(C)CC[C@H](O)[C@H]2C
(24S)-14alpha,24-Dimethyl-9beta,19-cyclo-5alpha-cholest-25en-3beta-ol	0	Accepted	412.37	0.245	0.009	6.679	-6.204	0.227	[H][C@@]12CCC3[C@@]4(C[C@]14CC[C@H](O)C2)CC[C@]1(C)[C@@H](CC[C@@]31C)[C@H](C)CC[C@@H](C)C(C)=C
(24S)-24-Methyl-25-dehydrocholesterol	0	Accepted	398.35	0.186	0.003	7.384	-6.542	0.232	[H][C@@]12CC[C@H]([C@H](C)CC[C@@H](C)C(C)=C)[C@@]1(C)CC[C@@]1([H])[C@@]2([H])CC=C2C[C@@H](O)CC[C@]12C
24-Methylene-31-nor-5alpha-cycloartan-3-one	0	Accepted	424.37	0.353	0.009	7.245	-6.641	0.205	[H][C@@]12CC[C@]3([H])[C@@]4(C[C@]14CCC(=O)C2C)CC[C@]1(C)[C@H](CC[C@@]31C)[C@H](C)CCC(=C)C(C)C
24-Methylene-31-nor-5alpha-lanost-9(11)-3beta-ol	0	Accepted	426.39	0.23	0.01	7.843	-6.941	0.257	CC(C)C(=C)CC[C@@H](C)[C@H]1CC[C@@]2(C)C3CC[C@H]4C(C)[C@@H](O)CC[C@]4(C)C3=CC[C@]12C
24-Methylene-cycloartanol palmitate	0	Rejected	678.63	0.02	0.002	13.73	-8.341	0.017	[H][C@@]12CC[C@]3([H])[C@]4(C[C@@]14CC[C@]1(C)[C@H](CC[C@@]21C)[C@H](C)CCC(=C)C(C)C)CC[C@H](OC(=O)CCCCCCCCCCCCCCC)C3(C)C
5-Hydroxy-L-tryptophan	3	Accepted	220.08	0.106	0.013	-1.906	-2.255	0.345	N[C@@H](CC1=CNC2=C1C=C(O)C=C2)C(O)=O
Latex	2	Accepted	416.2	0.712	0.06	2.997	-4.49	0.948	[H][C@@]12CC[C@@]3(CCC(=O)O3)[C@@]1(C)CC[C@@]1([H])[C@@]2([H])[C@@]([H])(CC2=CC(=O)CC[C@]12C)SC(C)=O
MFA	2	Accepted	418.25	0.171	0.009	5.251	-6.373	0.009	COC(=O)C1=CC2=CCC3C4CC[C@H](C(=O)C5=CC=CC=C5)[C@@]4(C)CCC3[C@@]2(C)CC1
Nonancosane	0	Accepted	408.47	0.014	0.009	13.574	-8.034	0.003	CCCCCCCCCCCCCCCCCCCCCCCCCCCCC
Propanolamine	0	Accepted	75.07	0.276	0.176	-1.349	0.996	0.268	NCCCO
Putresine	0	Accepted	88.1	0.112	0.055	-0.971	1.127	0.343	NCCCCN
2-Epi-alpha-cedrene	0	Accepted	204.19	0.083	0.002	5.185	-4.964	0.139	[H][C@@]12CC[C@H](C)[C@]11C[C@@H](C(C)=CC1)C2(C)C
5,10(15)-Cadinen-4-ol	0	Accepted	220.18	0.852	0.014	3.406	-4.389	0.982	CC(C)C1CCC(=C)C2CCC(C)(O)C=C12
beta-Cedrene	0	Accepted	204.19	0.472	0.007	5.02	-4.729	0.228	[H][C@@]12CC[C@@H](C)[C@]11C[C@@H](C(=C)CC1)C2(C)C
cis-Allo ocimene	1	Accepted	136.13	0.327	0.162	3.872	-3.563	0.323	CC=C(C)C=CC=C(C)C
gamma-Gurjunene	0	Accepted	204.19	0.493	0.027	4.84	-6.169	0.936	CC1CCC2C(C)CCC(C=C12)C(C)=C
Germacrene A	0	Accepted	204.19	0.71	0.005	4.437	-4.33	0.975	CC(=C)[C@H]1CC\C(C)=C/CC\C(C)=C/C1
Humulene epoxide	1	Accepted	220.18	0.056	0.012	4.695	-5.108	0.284	[H]C1=C([H])C(C)(C)CC2OC2(C)CC\C([H])=C(C)\C1
Nerolidiol	1	Accepted	222.2	0.227	0.002	4.277	-3.929	0.759	C=C[C@@](C)(O)CC\C=C(\C)CCC=C(C)C
Octen-1-ol acetate	0	Accepted	170.13	0.769	0.041	2.881	-2.78	0.995	[H]\C(CCCCCC)=C(\[H])OC(C)=O
Planteose	0	Rejected	504.17	0.016	0.097	-3.168	-0.343	0.277	OC[C@H]1O[C@H](OC[C@H]2O[C@@](CO)(O[C@H]3O[C@H](CO)[C@@H](O)[C@H](O)[C@H]3O)[C@@H](O)[C@@H]2O)[C@H](O)[C@@H](O)[C@H]1O
Salicylic acid 2-beta-D-glucoside	0	Accepted	300.08	0.031	0.049	-0.319	-1.03	0.253	[H][C@]1(CO)O[C@@]([H])(OC2=CC=CC=C2C([O-])=O)[C@]([H])(O)[C@@]([H])(O)[C@]1([H])O
trans-Allo-ocimene	1	Accepted	108.09	0.518	0.108	1.168	-1.633	0.739	[H]\C(C)=C(\[H])/C(/[H])=C(\[H])/C(/[H])=C(\[H])C
Dihomolinolenic acid	0	Accepted	306.26	0.557	0.604	4.104	-3.02	0.005	CC\C=C/C\C=C/C\C=C/CCCCCCCCCC(O)=O
Oenothein A	5	Rejected	2352.23	0.001	0.011	3.005	-0.862	0	OC1OC2COC(=O)C3=C(C(O)=C(O)C(O)=C3)C3=C(O)C(O)=C(O)C=C3C(=O)OC2C(OC(=O)C2=CC(O)=C(O)C(O)=C2)C1OC(=O)C1=CC(O)=C(O)C(O)=C1OC1=CC2=C(C(O)=C1O)C1=C(O)C(O)=C3OC4=C(O)C(O)=C(O)C(=C4)C(=O)OC4C(O)C5OC(=O)C6=C(C(O)=C(O)C(O)=C6)C6=C(O)C(O)=C(OC7=C(O)C(O)=C(O)C=C7C(=O)OC7C(O)OC(COC2=O)C(OC(=O)C1=C3)C7OC(=O)C1=CC(O)=C(O)C(O)=C1)C=C6C(=O)OCC5OC4OC(=O)C1=CC(O)=C(O)C(O)=C1
Oenotherin	6	Rejected	2368.22	0.001	0.023	2.581	0.1	0	OC1O[C@@H]2COC(=O)C3=CC(O)=C(O)C(O)=C3C3=C(O)C(O)=C(O)C=C3C(=O)O[C@H]2[C@H](OC(=O)C2=CC(O)=C(O)C(O)=C2)[C@H]1OC(=O)C1=CC(O)=C(O)C(O)=C1OC1=C(O)C(O)=C2C(=C1)C(=O)OC[C@H]1OC(O)[C@@H]3OC(=O)C4=CC(O)=C(O)C(O)=C4OC4=C(O)C5=C6C7C(=CC(=O)C(O)(O)[C@@]7(O)O5)C(=O)O[C@@H]5[C@@H](COC(=O)C6=C4)OC(O)[C@H](OC(=O)C4=CC(O)=C(O)C(O)=C4OC4=C(O)C(O)=C2C(=C4)C(=O)O[C@H]1[C@@H]3OC(=O)C1=CC(O)=C(O)C(O)=C1)[C@H]5OC(=O)…
(+)-Cycloolivil	1	Accepted	376.15	0.029	0.315	0.746	-2.228	0.083	COC1=CC2=C(C=C1O)C(C(CO)C(O)(CO)C2)C1=CC(OC)=C(O)C=C1
3,4-Dihydroxyphenylethanol-4-diglucoside	1	Rejected	478.17	0.088	0.12	-1.97	-0.942	0.252	OCCC1=CC(O)=C(O[C@@H]2O[C@H](CO[C@@H]3O[C@H](CO)[C@@H](O)[C@H](O)[C@H]3O)[C@@H](O)[C@H](O)[C@H]2O)C=C1
Apigenin 7-di-O-xyloside	1	Rejected	566.13	0.598	0.788	0.11	-2.788	0.077	O[C@H]1O[C@@H](O[C@H]2O[C@@H](OC3=CC4=C(C(O)=C3)C(=O)C=C(O4)C3=CC=C(O)C=C3)[C@H](O)[C@@H](O)[C@@H]2O)[C@H](O)[C@@H](O)[C@@H]1O
Cornoside	1	Accepted	316.12	0.837	0.148	-1.105	-0.959	0.378	OC[C@@H]1O[C@H](OCCC2(O)C=CC(=O)C=C2)[C@@H](O)[C@H](O)[C@H]1O
Dihydrocinchonine	1	Accepted	296.19	0.197	0.033	3.229	-2.596	0.831	CC[C@H]1CN2CCC1C[C@@H]2[C@@H](O)C1=CC=NC2=CC=CC=C12
Halleridone	1	Accepted	154.06	0.868	0.143	-0.34	-0.464	0.995	OC12CCOC1CC(=O)C=C2
L-Olivil	1	Accepted	376.15	0.151	0.396	1.152	-2.63	0.105	COC1=C(O)C=CC(CC2(O)COC(C2CO)C2=CC(OC)=C(O)C=C2)=C1
Luteolin 5-glucoside	2	Rejected	448.1	0.101	0.713	0.131	-3.836	0.039	[H]C1(CO)O[C@@]([H])(OC2=CC(O)=CC3=C2C(=O)C=C(O3)C2=CC(O)=C(O)C=C2)C([H])(O)[C@@]([H])(O)[C@]1([H])O
Nuzhenide	2	Rejected	686.24	0.757	0.653	-0.217	-1.949	0.176	[H]\C(C)=C1/[C@]([H])(O[C@]2([H])O[C@]([H])(CO)[C@@]([H])(O)[C@]([H])(O)[C@@]2([H])O)OC=C(C(=O)OC)C1([H])CC(=O)OC[C@@]1([H])O[C@@]([H])(OCCC2=CC=C(O)C=C2)[C@]([H])(O)[C@@]([H])(O)[C@]1([H])O
(+)-Mentha-1,8-diene	0	Accepted	136.13	0.857	0.023	4.446	-4.107	0.882	CC(=C)[C@@H]1CCC(C)=CC1
1-Ethoxy-p-menth-2-ene	0	Accepted	182.17	0.157	0.027	3.797	-4.045	0.213	CCOC1(C)CCC(C=C1)C(C)C
4-Ethoxy-p-menth-1-ene	0	Accepted	182.17	0.658	0.029	4.281	-3.981	0.21	CCOC1(CCC(C)=CC1)C(C)C
alpha-Elemene	1	Accepted	204.19	0.724	0.016	4.751	-4.992	0.051	CC(C)C1=CC(CCC1(C)C=C)=C(C)C
cis-3-Ethoxy-p-menth-1-ene	0	Accepted	182.17	0.202	0.159	4.021	-3.928	0.384	CCOC1C=C(C)CCC1C(C)C
cis-p-Menth-2-enol	0	Accepted	154.14	0.412	0.066	2.506	-2.458	0.991	CC(C)C1CCC(C)C=C1O
cis-Sabinene hydrate acetate	0	Accepted	196.15	0.414	0.01	2.31	-2.453	0.583	[H]C12C[C@@]1(CC[C@@]2(C)OC(C)=O)C(C)C
Ethyl linilenate	0	Accepted	306.26	0.059	0.002	6.013	-5.694	0.015	[H]\C(CC)=C(\[H])C\C([H])=C(/[H])C\C([H])=C(/[H])CCCCCCCC(=O)OCC
Majaronin	2	Accepted	360.08	0.073	0.468	2.771	-3.804	0.003	COC1=C(O)C=CC(=C1)C1=CC(=O)C2=C(O)C(O)=C(OC)C(OC)=C2O1
Terpinenol	0	Accepted	154.14	0.412	0.066	2.506	-2.458	0.991	CC(C)C1=C(O)CC(C)CC1
4,5-Dimethyl-2-ethylphenol	1	Accepted	150.1	0.277	0.142	3.48	-2.622	0.835	CCC1=CC(C)=C(C)C=C1O
alpha,alpha-Dimethylbenzyl alcohol	0	Accepted	136.09	0.404	0.007	1.829	-1.21	0.867	CC(C)(O)C1=CC=CC=C1
alpha-Humulene epoxide	1	Accepted	220.18	0.059	0.008	4.697	-5.543	0.504	[H]C1=C([H])C(C)(C)C[C@@]2([H])O[C@]2(C)CC\C([H])=C(C)\C1
Cedranoxide	0	Accepted	206.17	0.306	0.018	3.489	-4.311	0.124	C[C@@H]1CCC2[C@@H]3CO[C@]4(C)CC[C@]12C[C@H]34
cis-Pinane	0	Accepted	138.14	0.034	0.003	4.115	-4.962	0.882	CC1CCC2CC1C2(C)C
cis-Thujanol	0	Accepted	154.14	0.108	0.023	2.292	-2.711	0.815	CC(C)[C@]12CC1C(C)[C@H](O)C2
Elemenal	3	Accepted	218.17	0.877	0.043	3.585	-4.17	0.399	CC(=C)C1CC(CCC1(C)C=C)C(=C)C=O
Elemene	1	Accepted	204.19	0.146	0.007	4.79	-4.949	0.216	CC(=C)C1CCC(C)(C=C)C(C1)C(C)=C
Manoyl oxide	1	Accepted	290.26	0.063	0.004	5.768	-5.96	0.117	CC1(C)CCC[C@]2(C)[C@@H]1CC[C@]1(C)O[C@](C)(CC[C@@H]21)C=C
(+)-Dehydrovomifoliol	2	Accepted	222.13	0.939	0.546	1.275	-2.5	0.851	[H]\C(=C(\[H])[C@@]1(O)C(C)=CC(=O)CC1(C)C)C(C)=O
1-Rhamnono-1,4-lactone	0	Accepted	162.05	0.017	0.039	-1.521	0.063	0.512	CC(O)C1OC(=O)C(O)C1O
(11R,12S,13S)-Epoxy-hydroxyoctadeca-cis-9-cis-15-dien-1-oic acid	1	Accepted	310.21	0.444	0.017	2.699	-3.326	0.046	CC\C=C/C[C@@H]1O[C@H]1[C@H](O)\C=C/CCCCCCCC(O)=O
(11S,12S,13S)-Epoxy-hydroxyoctadeca-cis-9-cis-15-dien-1-oic acid	1	Accepted	310.21	0.615	0.016	2.76	-3.316	0.05	CC\C=C/C[C@@H]1O[C@H]1[C@@H](O)\C=C/CCCCCCCC(O)=O
2,4-Dinitrophenylhydrazone	5	Accepted	270.06	0.805	0.998	0.787	-1.574	0.279	OCC(CO)=NNC1=CC=C(C=C1[N+]([O-])=O)[N+]([O-])=O
24-Methyl-24-methoxycycloartanol	0	Accepted	472.43	0.045	0.001	7.823	-6.404	0.049	[H][C@@]12CC[C@]3([H])[C@]4(C[C@@]14CC[C@]1(C)[C@H](CC[C@@]21C)[C@H](C)CCC(C)(OC)C(C)C)CC[C@H](O)C3(C)C
25-Ethoxy-24-methoxycylcoartanol	0	Accepted	488.42	0.031	0.024	6.358	-6.037	0.153	CCOC(C)C(CC[C@@H](C)C1CC[C@@]2(C)C3CCC4C5(CC35CC[C@]12C)CC[C@H](O)C4(C)C)OC
25-Hydroxy-24-methoxycycloartanol	0	Accepted	460.39	0.054	0.004	5.977	-4.846	0.12	[H][C@@]12CC[C@]3([H])[C@]4(C[C@@]14CC[C@]1(C)[C@H](CC[C@@]21C)[C@H](C)CCC(OC)C(C)O)CC[C@H](O)C3(C)C
Cellopentaosylsitosterol	0	Rejected	1224.65	0.018	0.052	-0.002	-1.813	0.169	CCC(CCC(C)C1CCC2C3CC=C4CC(CCC4(C)C3CCC12C)OC1OC(CO)C(OC2OC(CO)C(OC3OC(CO)C(OC4OC(CO)C(OC5OC(CO)C(O)C(O)C5O)C(O)C4O)C(O)C3O)C(O)C2O)C(O)C1O)C(C)C
Cellotetraosylsitosterol	0	Rejected	1062.6	0.024	0.069	1.986	-2.701	0.115	CCC(CCC(C)C1CCC2C3CC=C4CC(CCC4(C)C3CCC12C)OC1OC(CO)C(OC2OC(CO)C(OC3OC(CO)C(OC4OC(CO)C(O)C(O)C4O)C(O)C3O)C(O)C2O)C(O)C1O)C(C)C
Ceramide	0	Accepted	481.45	0.013	0.006	8.842	-3.594	0.01	CCCCCCCCCCCCC\C=C\[C@@H](O)[C@H](CO)NC(=O)CCCCCCCCCCC
D-Alanyl-D-alanine	0	Accepted	160.08	0.01	0.008	-2.152	-0.064	0.766	CC(N)C(O)=NC(C)C(O)=O
D-Alanyl glycine	0	Accepted	146.07	0.03	0.028	-2.766	-0.194	0.495	[H][C@](C)(N)C(O)=NCC(O)=O
D-Arabinono-1,4-lactone	0	Accepted	148.04	0.031	0.514	-1.881	-0.234	0.28	OC[C@H]1OC(=O)[C@@H](O)[C@@H]1O
Desoxycorticosterol	1	Accepted	330.22	0.662	0.115	3.006	-3.384	0.571	[H][C@@]12CC[C@H](C(=O)CO)[C@@]1(C)CC[C@@]1([H])[C@@]2([H])CCC2=CC(=O)CC[C@]12C
Oryzanol B	2	Rejected	616.45	0.026	0.003	8.54	-6.835	0.059	[H]\C(=C(\[H])C1=CC(OC)=C(O)C=C1)C(=O)O[C@@]1([H])CC[C@]23C[C@]22CC[C@]4(C)[C@]([H])(CCC4([H])[C@]2(C)CC[C@@]3([H])C1(C)C)[C@]([H])(C)CCC(=C)C(C)C
Oryzenin	1	Accepted	265.11	0.772	0.008	-1.681	-1.172	0.831	[Cl-].CC1=C(CCO)SC=[N+]1CC1=C(N)N=C(C)N=C1
Sativic acid	0	Accepted	348.25	0.025	0.028	2.261	-2.893	0.27	CCCCCC(O)C(O)CC(O)C(O)CCCCCCCC(O)=O
Uracil	0	Accepted	112.03	0.673	0.071	-1.268	-1.218	0.084	O=C1NC=CC(=O)N1
Violanthin	1	Rejected	578.16	0.041	0.799	0.288	-2.295	0.059	C[C@@H]1O[C@H]([C@H](O)[C@H](O)[C@H]1O)C1=C(O)C([C@@H]2O[C@H](CO)[C@@H](O)[C@H](O)[C@H]2O)=C(O)C2=C1OC(=CC2=O)C1=CC=C(O)C=C1
Isobergapten	2	Accepted	216.04	0.873	0.132	2.197	-3.681	0.039	COC1=CC2=C(C=CO2)C2=C1C=CC(=O)O2
Sphondin	2	Accepted	216.04	0.906	0.308	1.971	-3.557	0.049	COC1=C2OC=CC2=C2OC(=O)C=CC2=C1
D-Glycero-D-galactoheptose	1	Accepted	210.07	0.003	0.045	-2.579	0.161	0.522	OCC(O)C(O)C(O)C(O)C(O)C=O
Galactitol	0	Accepted	182.08	0.011	0.052	-2.275	-0.069	0.267	OC[C@H](O)[C@@H](O)[C@@H](O)[C@H](O)CO
(+)-m-Mentha-1(6),8-diene	0	Accepted	136.13	0.875	0.018	4.416	-4.059	0.913	CC(=C)[C@@H]1CCC=C(C)C1
Hex-3-en-1-yl acetate	0	Accepted	142.1	0.573	0.016	1.41	-2.424	0.293	CC\C=C/CCCC(O)=O
LF	0	Accepted	278.16	0.059	0.01	1.286	-1.593	0.515	CC(C)CC(N)C(=O)NC(CC1=CC=CC=C1)C(O)=O
Pentatriacontane	0	Accepted	492.56	0.009	0.01	15.923	-8.407	0.001	CCCCCCCCCCCCCCCCCCCCCCCCCCCCCCCCCCC
Saxalin	4	Accepted	322.06	0.683	0.043	3.307	-3.664	0.021	CC(C)(Cl)C(O)COC1=C2C=COC2=CC2=C1C=CC(=O)O2
Phaseic acid	2	Accepted	280.13	0.135	0.033	1.238	-1.439	0.947	C\C(\C=C\C1(O)C2(C)COC1(C)CC(=O)C2)=C/C(O)=O
Phaseollin isoflavone	1	Accepted	336.1	0.845	0.019	4.563	-3.354	0.018	CC1(C)OC2=C(C=C1)C(O)=C(C=C2)C1=COC2=C(C=CC(O)=C2)C1=O
24-alpha-Methyllophenol	0	Accepted	414.39	0.094	0.004	8.013	-7.126	0.485	[H][C@@]12CC=C3C4CC[C@H]([C@H](C)CC[C@H](C)C(C)C)[C@@]4(C)CCC3[C@@]1(C)CC[C@H](O)[C@H]2C
Glucokinin	1	Rejected	764.43	0.534	0.283	4.1	-4.612	0.058	[H][C@]12CC[C@]3([H])[C@]([H])(CC[C@]4(C)[C@H](CC[C@]34O)C3=CC(=O)OC3)[C@@]1(C)CC[C@@H](C2)O[C@H]1C[C@H](O)[C@H](O[C@H]2C[C@H](O)[C@H](O[C@H]3C[C@H](O)[C@H](O)[C@@H](C)O3)[C@@H](C)O2)[C@@H](C)O1
Kaempferol 3-O-beta-D-diglucopyranoside 7-O-beta-D-glucopyranoside	1	Rejected	772.21	0.069	0.338	-1.564	-2.608	0.309	OC[C@H]1O[C@@H](OC[C@H]2O[C@@H](OC3=C(OC4=C(C(O)=CC(O[C@@H]5O[C@H](CO)[C@@H](O)[C@H](O)[C@H]5O)=C4)C3=O)C3=CC=C(O)C=C3)[C@H](O)[C@@H](O)[C@@H]2O)[C@H](O)[C@@H](O)[C@@H]1O
Kaempferol 3-O-beta-robinoside 7-O-alpha-L-rhamnopyranoside	1	Rejected	740.22	0.077	0.776	-0.107	-3.677	0.116	C[C@@H]1O[C@@H](OC[C@H]2O[C@@H](OC3=C(OC4=C(C(O)=CC(O[C@@H]5O[C@@H](C)[C@H](O)[C@@H](O)[C@H]5O)=C4)C3=O)C3=CC=C(O)C=C3)[C@H](O)[C@@H](O)[C@H]2O)[C@H](O)[C@H](O)[C@H]1O
Malvidin 3,5-diglucoside	1	Rejected	655.19	0.023	0.251	-0.329	-2.301	0.167	[Cl-].COC1=CC(=CC(OC)=C1O)C1=C(O[C@@H]2O[C@H](CO)[C@@H](O)[C@H](O)[C@H]2O)C=C2C(O[C@@H]3O[C@H](CO)[C@@H](O)[C@H](O)[C@H]3O)=CC(O)=CC2=[O+]1
Quercetin 3-O-beta-D-glucopyranoside 7-O-beta-L-rutinoside	2	Rejected	772.21	0.087	0.668	-0.874	-3.368	0.178	C[C@H]1O[C@H](OC[C@@H]2O[C@H](OC3=CC4=C(C(O)=C3)C(=O)C(O[C@@H]3O[C@H](CO)[C@@H](O)[C@H](O)[C@H]3O)=C(O4)C3=CC(O)=C(O)C=C3)[C@@H](O)[C@H](O)[C@H]2O)[C@@H](O)[C@@H](O)[C@@H]1O
Quercetin 3-O-beta-robinoside 7-O-alpha-L-rhamnopyranoside	2	Rejected	756.21	0.09	0.819	-0.195	-3.316	0.089	C[C@@H]1O[C@@H](OC[C@H]2O[C@@H](OC3=C(OC4=C(C(O)=CC(O[C@H]5O[C@@H](C)[C@H](O)[C@@H](O)[C@@H]5O)=C4)C3=O)C3=CC(O)=C(O)C=C3)[C@H](O)[C@@H](O)[C@H]2O)[C@H](O)[C@H](O)[C@H]1O
Quercetin 3-O-methyl-ether	2	Accepted	316.06	0.045	0.677	2.494	-3.642	0.007	COC1=C(OC2=CC(O)=CC(O)=C2C1=O)C1=CC(O)=C(O)C=C1
5alpha-Stigmast-22-ene-3,6-dione	0	Accepted	426.35	0.017	0.006	5.821	-5.923	0.868	CC[C@@H](C(C)C)\C=C\[C@@H](C)C1CCC2C3CC(=O)[C@@]4([H])CC(=O)CC[C@]4(C)C3CC[C@]12C
5alpha-Stigmastan-3,6-dione	0	Accepted	428.37	0.01	0.006	6.275	-6.128	0.868	[H][C@]12CC(=O)CC[C@]1(C)C1CC[C@]3(C)C(CCC3C1CC2=O)[C@H](C)CC[C@@H](CC)C(C)C
6beta-Hydroxystigmast-4-en-3-one	0	Accepted	428.37	0.01	0.006	6.275	-6.128	0.868	CC[C@H](CC[C@@H](C)C1CCC2C3C[C@@H](O)C4=CC(=O)CC[C@]4(C)C3CC[C@]12C)C(C)C
6beta-Hydroxycampest-4-ene-3-one	0	Accepted	414.35	0.013	0.007	5.927	-5.98	0.961	CC(C)[C@H](C)CC[C@@H](C)C1CCC2C3C[C@@H](O)C4=CC(=O)CC[C@]4(C)C3CC[C@]12C
6beta-Hydroxystigmasta-4,22-dien-3-one	0	Accepted	426.35	0.017	0.006	5.821	-5.923	0.868	CC[C@@H](C(C)C)\C=C\[C@@H](C)C1CCC2C3C[C@@H](O)C4=CC(=O)CC[C@]4(C)C3CC[C@]12C
Baikiain	0	Accepted	127.06	0.103	0.011	-1.785	-1.115	0.777	OC(=O)C1CC=CCN1
Campest-4-en-3,6-dione	0	Accepted	412.33	0.035	0.012	5.264	-5.426	0.911	CC(C)[C@H](C)CC[C@@H](C)C1CCC2C3CC(=O)C4=CC(=O)CC[C@]4(C)C3CC[C@]12C
Dehydro-beta-carotene	1	Rejected	534.42	0.107	0.09	7.948	-4.911	0.001	C\C(\C=C\C=C\C(\C)=C\C=C\C(\C)=C\C=C1/C(C)=CCCC1(C)C)=C/C=C/C(/C)=C/C=C1\C(C)=CCCC1(C)C
Estrogen	1	Accepted	268.15	0.124	0.03	4.039	-3.724	0.107	CC\C(=C(\CC)C1=CC=C(O)C=C1)C1=CC=C(O)C=C1
Linonelic acid	0	Accepted	280.24	0.351	0.106	4.597	-3.192	0.014	CCCCC\C=C/C\C=C/CCCCCCCC(O)=O
Stigmast-4,22-diene-3,6-dione	0	Accepted	424.33	0.042	0.009	5.13	-5.533	0.512	CC[C@@H](C(C)C)\C=C\[C@@H](C)C1CCC2C3CC(=O)C4=CC(=O)CC[C@]4(C)C3CC[C@]12C
1-Methyl-4-isobutylbenzene	0	Accepted	148.13	0.477	0.015	4.401	-4.707	0.861	CC(C)CC1=CC=C(C)C=C1
alpha-Himachalene	0	Accepted	204.19	0.104	0.018	5.746	-6.325	0.732	CC1=CC2C(CC1)C(=C)CCCC2(C)C
beta-Himachalene	0	Accepted	204.19	0.056	0.011	6.014	-6.341	0.096	CC1=CC2C(CC1)=C(C)CCCC2(C)C
delta-Elemene	1	Accepted	204.19	0.429	0.011	4.916	-5.047	0.109	CC(C)C1=CC(C(C)=C)C(C)(CC1)C=C
4,4'-Dimethoxystilbene	0	Accepted	240.12	0.744	0.864	3.823	-4.867	0.356	COC1=CC=C(\C=C\C2=CC=C(OC)C=C2)C=C1
Proazulene	0	Accepted	306.15	0.219	0.021	1.761	-2.853	0.967	[H][C@@]1(C)C(=O)O[C@]2([H])[C@]3([H])C(C=C[C@@]3(C)O)=C(C)C[C@]([H])(OC(C)=O)[C@@]12[H]
1(7),2-p-Menthadien-6-ol	0	Accepted	152.12	0.876	0.139	2.009	-1.93	0.987	CC(C)C1CC(O)C(=C)C=C1
1,8-Menthadien-2-ol	0	Accepted	152.12	0.77	0.037	2.222	-2.151	0.984	CC(=C)C1CCC(C)=C(O)C1
2-trans-8-trans-Piperamide-C-9-2	3	Accepted	327.18	0.699	0.006	3.996	-4.436	0.293	O=C(\C=C\CCCC\C=C\C1=CC=C2OCOC2=C1)N1CCCC1
3,8(9)-p-Menthadien-1-ol	0	Accepted	152.12	0.539	0.005	2.158	-2.263	0.802	CC(=C)C1=CC[C@](C)(O)CC1
4-Methyltriacontane	0	Accepted	436.5	0.011	0.008	14.06	-8.154	0.003	CCCCCCCCCCCCCCCCCCCCCCCCCCC(C)CCC
4-Methyltritriacontane	0	Accepted	478.55	0.009	0.009	15.241	-8.343	0.001	CCCCCCCCCCCCCCCCCCCCCCCCCCCCCC(C)CCC
6-trans-Piperamide-C-7-1	2	Accepted	301.17	0.801	0.008	2.713	-3.041	0.981	O=C(CCCC\C=C\C1=CC=C2OCOC2=C1)N1CCCC1
8-trans-Piperamide-C-9-1	2	Accepted	329.2	0.663	0.007	3.819	-4.064	0.957	O=C(CCCCCC\C=C\C1=CC=C2OCOC2=C1)N1CCCC1
alpha-cis-bergamotene	0	Accepted	204.19	0.457	0.008	5.811	-5.05	0.346	CC(C)=CCC[C@]1(C)[C@H]2C[C@@H]1C(C)=CC2
beta-Pinone	0	Accepted	138.1	0.047	0.008	2.12	-2.496	0.972	CC1(C)C2CC1C(=O)CC2
cis-2,8-Menthadien-2-ol	0	Accepted	152.12	0.77	0.037	2.222	-2.151	0.984	CC1CCC(C=C1O)C(C)=C
cis-p-2-Menthen-1-ol	0	Accepted	154.14	0.056	0.008	2.989	-2.657	0.965	CC(C)(C)C1CCC(O)C=C1
Hentriacontan-16-ol	0	Accepted	452.5	0.013	0.004	12.591	-7.514	0.002	CCCCCCCCCCCCCCCC(O)CCCCCCCCCCCCCCC
Hentriacontanol	0	Accepted	452.5	0.014	0.008	13.055	-7.667	0.002	CCCCCCCCCCCCCCCCCCCCCCCCCCCCCCCO
Kaempferol 3-O-arabinosyl 7-O-rhamnoside	1	Rejected	564.15	0.255	0.8	0.568	-4.714	0.061	C[C@@H]1O[C@@H](OC2=CC3=C(C(O)=C2)C(=O)C(O[C@@H]2O[C@H](CO)[C@@H](O)[C@@H]2O)=C(O3)C2=CC=C(O)C=C2)[C@H](O)[C@H](O)[C@H]1O
m-Methyl acetophenone	1	Accepted	257.98	0.271	0.453	-1.636	-1.585	0.519	[Na+].CC(=O)NC1=CC=CC(=C1)[As](O)([O-])=O
N-Butyophenone	0	Accepted	148.09	0.293	0.048	2.722	-2.853	0.97	CCCC(=O)C1=CC=CC=C1
N-Isobutyloctadeca-trans-2-trans-4-dienamide	1	Accepted	335.32	0.089	0.013	7.442	-4.889	0.234	[H]\C(CCCCCCCCCCCCC)=C(\[H])/C(/[H])=C(\[H])C(O)=NCC(C)C
Quercetin 3-O-alpha-D-galactoside	2	Rejected	464.1	0.04	0.834	0.29	-4.147	0.016	OC[C@@H]1O[C@@H](OC2=C(OC3=C(C(O)=CC(O)=C3)C2=O)C2=CC(O)=C(O)C=C2)[C@@H](O)[C@H](O)[C@@H]1O
9,10-Cyclo-2,4-menthanediol	0	Accepted	170.13	0.063	0.029	0.975	-1.218	0.987	CC1CCC(O)(CC1O)C1CC1
1-3-(4,5-dihydrofuranone)-5-(hydroxymethyl)-pyrrole-2-carboxyaldehyde	2	Accepted	195.05	0.832	0.054	-0.158	-1.089	0.026	OCC1=CC=C(O)N1C1C=COC1=O
14-Hentriacontanol	0	Accepted	452.5	0.012	0.005	12.736	-7.616	0.002	CCCCCCCCCCCCCCCCCC(O)CCCCCCCCCCCCC
Kaempferol 3-coumaroyl-triglucoside	1	Rejected	756.21	0.08	0.612	-0.786	-3.344	0.19	C[C@@H]1O[C@@H](OC2=CC3=C(C(O)=C2)C(=O)C(O[C@@H]2O[C@H](CO[C@@H]4O[C@H](CO)[C@@H](O)[C@H](O)[C@H]4O)[C@@H](O)[C@H](O)[C@H]2O)=C(O3)C2=CC=C(O)C=C2)[C@H](O)[C@H](O)[C@H]1O
Kaempferol 3-feruloyl-triglucoside	1	Rejected	610.15	0.087	0.765	-0.578	-3.219	0.08	COC1=CC(\C=C\C(=O)OC[C@H]2O[C@@H](O)[C@H](O)[C@@H](O)[C@@H]2O)=CC=C1O.OC[C@H]1O[C@@H](OC[C@H]2O[C@@H](OC3=C(OC4=C(C(O)=CC(O)=C4)C3=O)C3=CC=C(O)C=C3)[C@H](O)[C@@H](O)[C@@H]2O)[C@H](O)[C@@H](O)[C@@H]1O
L-(-)-Homoserine	0	Accepted	119.06	0.034	0.025	-3.17	0.036	0.635	N[C@@H](CCO)C(O)=O
Legumin	0	Accepted	227.05	0.617	0.018	1.414	-1.887	0.515	[Na+].[Na+].CC1=C(OCCCC([O-])=O)C=CC(Cl)=C1.[O-]C(=O)CCCOC1=C(Cl)C=C(Cl)C=C1
Pyrroline	0	Accepted	69.06	0.854	0.09	1.305	-0.5	0.969	C1CC=CN1
Quercetin 3-coumaroyl-triglucoside	2	Rejected	488.15	0.148	0.271	-0.746	-1.141	0.17	OC[C@H]1O[C@@H](OC2=C(OC3=C(C(O)=CC(O)=C3)C2=O)C2=CC(O)=C(O)C=C2)[C@H](O)[C@@H](O)[C@@H]1O.O[C@@H]1O[C@H](CO[C@@H]2O[C@H](COC(=O)\C=C\C3=CC=C(O)C=C3)[C@@H](O)[C@H](O)[C@H]2O)[C@@H](O)[C@H](O)[C@H]1O
Quercetin 3-feruloyl-triglucoside	2	Rejected	518.16	0.108	0.362	-0.693	-1.145	0.167	OC[C@H]1O[C@@H](OC2=C(OC3=C(C(O)=CC(O)=C3)C2=O)C2=CC(O)=C(O)C=C2)[C@H](O)[C@@H](O)[C@@H]1O.COC1=CC(\C=C\C(=O)OC[C@H]2O[C@@H](OC[C@H]3O[C@@H](O)[C@H](O)[C@@H](O)[C@@H]3O)[C@H](O)[C@@H](O)[C@@H]2O)=CC=C1O
Quercetin 3-triglucoside	2	Rejected	788.2	0.058	0.544	-1.742	-2.047	0.171	OC[C@H]1O[C@@H](OC[C@H]2O[C@@H](OC[C@H]3O[C@@H](OC4=C(OC5=C(C(O)=CC(O)=C5)C4=O)C4=CC(O)=C(O)C=C4)[C@H](O)[C@@H](O)[C@@H]3O)[C@H](O)[C@@H](O)[C@@H]2O)[C@H](O)[C@@H](O)[C@@H]1O
Cyanide	0	Accepted	27.01	0.85	0.166	-0.334	0.867	0.942	[C-]#N
delta-24-Cholesterol	0	Accepted	384.34	0.046	0.003	7.025	-6.958	0.684	C[C@H](CCC=C(C)C)C1CCC2C3CC=C4C[C@@H](O)CC[C@]4(C)C3CC[C@]12C
trans-Epoxydihydrolinalool	1	Accepted	170.13	0.131	0.02	1.757	-0.777	0.966	CC(C)(O)C1CCC(C)(O1)C=C
Mesocyanin	1	Rejected	610.15	0.11	0.656	-0.585	-1.637	0.092	Cl.[H][C@]1(CO)O[C@]([H])(OC2=C([O+]=C3C=C(O)C=C(O)C3=C2)C2=CC([O-])=C(O)C=C2)[C@]([H])(O[C@]2([H])O[C@]([H])(CO)[C@@]([H])(O)[C@]([H])(O)[C@@]2([H])O)[C@@]([H])(O)[C@]1([H])O
Aldobiouronic acid	2	Rejected	356.1	0.37	0.222	-3.299	-0.206	0.435	OC1OC(COC2OC(OC=O)C(O)C(O)C2O)C(O)C(O)C1O
D-Glucuronic acid	0	Accepted	194.04	0.006	0.033	-2.253	-0.053	0.402	[H]C1(O)O[C@]([H])(C(O)=O)[C@@]([H])(O)[C@]([H])(O)[C@@]1([H])O
2-Methylpropan-2-ol	0	Accepted	74.07	0.903	0.015	0.46	0.932	0.831	CC(C)(C)O
5-Ethoxythiazole	1	Accepted	129.02	0.485	0.141	1.59	-0.432	0.7	CCOC1=CN=CS1
6-Mercapto-hexan-1-ol	1	Accepted	134.08	0.678	0.146	1.511	-1.45	0.117	OCCCCCCS
Acutissimin B	3	Rejected	1206.14	0.003	0.062	2.49	-4.287	0	[H][C@]1(C2OC(=O)C3=C1C(O)=C(O)C(O)=C3C1=C3C(=C(O)C(O)=C1O)C1=C(O)C(O)=C(O)C=C1C(=O)OC1COC(=O)C4=CC(O)=C(O)C(O)=C4C4=C(C=C(O)C(O)=C4O)C(=O)OC1C2OC3=O)C1=C(O)C2=C(O[C@@H]([C@@H](O)C2)C2=CC=C(O)C(O)=C2)C=C1O
Dimethyl sulfone	1	Accepted	94.01	0.334	0.003	-1.251	-0.602	0.966	CS(C)(=O)=O
Luteic acid	4	Accepted	320.02	0.039	0.08	1.063	-3.048	0.012	OC(=O)C1=CC(O)=C(O)C2=C1C1=C(O)C(O)=C(O)C=C1C(=O)O2
Methylisopropyl ketone	1	Accepted	86.07	0.175	0.021	0.782	-0.06	0.99	CC(C)C(C)=O
p-Methylstyrene	1	Accepted	118.08	0.527	0.108	3.324	-3.475	0.963	CC1=CC=C(C=C)C=C1
Psidiolic acid	2	Accepted	129.04	0.576	0.037	-0.692	-0.802	0.248	OC(=O)[C@@H]1CCC(=O)N1
Valolaginic acid	4	Rejected	970.09	0.003	0.037	0.134	-1.831	0	OC(C1C(CC(O)=O)C(=O)OC2COC(=O)C3=CC(O)=C(O)C(O)=C3C3=C(O)C(O)=C(O)C=C3C(=O)OC2C2OC(=O)C3=C1C(O)=C(O)C(O)=C3C1=C(O)C(O)=C(O)C3=C1C(=O)OC2C3O)C(O)=O
1,2,3-tri-O-Galloyl-beta-4C1-glucose	3	Rejected	636.1	0.011	0.069	1.103	-2.175	0.018	OC[C@H]1O[C@@H](OC(=O)C2=CC(O)=C(O)C(O)=C2)[C@H](OC(=O)C2=CC(O)=C(O)C(O)=C2)[C@@H](OC(=O)C2=CC(O)=C(O)C(O)=C2)[C@@H]1O
1-O-Isopentyl-3-O-octadec-2-enoyl glycerol	0	Accepted	426.37	0.196	0.012	8.112	-5.892	0.025	CCCCCCCCCCCCCCCC=CC(=O)OCC(O)COCCC(C)C
2-(2'-Propenyl)-delta-1-piperideine	1	Accepted	123.1	0.831	0.016	2.132	-1.803	0.997	C=CCC1=NCCCC1
2-O-Galloyl-(4S,6S)-gallagoyl-D-glucose	5	Rejected	920.09	0.029	0.068	0.718	-6.226	0.001	O[C@@H]1O[C@@H]2COC(=O)C3=CC(O)=C(O)C(O)=C3C3=C(O)C(O)=C4OCC5=C(C(O)=C(O)C6=C5C4=C3C(=O)O6)C3=C(O)C(O)=C(O)C=C3C(=O)O[C@H]2[C@H](O)[C@H]1OC(=O)C1=CC(O)=C(O)C(O)=C1
Catechin-(4->8)-gallocatechin	2	Rejected	594.14	0.024	0.24	1.901	-4.14	0.003	O[C@H]1CC2=C(O[C@@H]1C1=CC(O)=C(O)C(O)=C1)C(C1[C@H](O)[C@H](OC3=C1C(O)=CC(O)=C3)C1=CC=C(O)C(O)=C1)=C(O)C=C2O
Corilagin	4	Rejected	634.08	0.009	0.199	0.911	-2.809	0.007	O[C@@H]1[C@H]2COC(=O)C3=CC(O)=C(O)C(O)=C3C3=C(O)C(O)=C(O)C=C3C(=O)O[C@@H]1[C@@H](O)[C@H](OC(=O)C1=CC(O)=C(O)C(O)=C1)O2
Estriol	1	Accepted	288.17	0.185	0.083	3.352	-3.713	0.333	[H][C@@]12C[C@@H](O)[C@H](O)[C@@]1(C)CC[C@]1([H])C3=C(CC[C@@]21[H])C=C(O)C=C3
Flavan-3-ol	2	Accepted	456.11	0.059	0.295	2.758	-4.1	0.008	COC1=C(O)C=C(C=C1O)C(=O)O[C@@H]1CC2=C(O[C@@H]1C1=CC(O)=C(O)C=C1)C=C(O)C=C2O
Flavogallol	4	Rejected	452	0.114	0.116	1.824	-5.806	0.004	OC1=CC2=C(C(O)=C1O)C1=C(OC2=O)C(O)=C2OC(=O)C3=CC(O)=C(O)C4=C3C2=C1C(=O)O4
Flavones	0	Accepted	222.07	0.781	0.807	3.844	-4.864	0.062	O=C1C=C(OC2=CC=CC=C12)C1=CC=CC=C1
Friedelin	0	Accepted	426.39	0.012	0.038	7.545	-6.845	0.484	CC1C(=O)CCC2C1(C)CCC1C2(C)CCC2(C)C3CC(C)(C)CCC3(C)CCC12C
Friedooleanan-3-one	0	Accepted	426.39	0.012	0.038	7.545	-6.845	0.484	CC1C(=O)CCC2C1(C)CCC1C2(C)CCC2(C)C3CC(C)(C)CCC3(C)CCC12C
Hygrine	1	Accepted	141.12	0.885	0.031	-0.091	0.004	0.901	CN1CCC[C@@H]1CC(C)=O
Lignan	0	Accepted	464.17	0.008	0.013	0.984	-3.083	0.236	COC1=CC(=CC(OC)=C1OC)C1C(C(O)=O)C(O)(CO)C(O)C2=CC(OC)=C(OC)C=C12
Norhygrine	1	Accepted	127.1	0.801	0.02	-0.335	-0.138	0.56	CC(=O)CC1CCCN1
Pelargonidin 3,5-di-O-glucoside	1	Rejected	595.17	0.358	0.359	-0.921	-2.732	0.429	OCC1OC(OC2=CC(O)=CC3=C2C=C(OC2OC(CO)C(O)C(O)C2O)C(=[O+]3)C2=CC=C(O)C=C2)C(O)C(O)C1O
Piperidines	0	Accepted	163.08	0.023	0.044	-2.475	-0.155	0.316	OCC1[NH2+]CC(O)C(O)C1O
Resins	0	Accepted	290.21	0.039	0.01	1.186	-2.109	0.55	OCCCCCC(O)C(O)CCCCCCCC(O)=O.C[C@@]1(CO)[C@H]2CC3([C@@H](CCC13)C(O)=O)[C@@H](O)C=C2C(O)=O
Sedridine	0	Accepted	143.13	0.053	0.045	0.315	0.327	0.587	C[C@@H](O)C[C@H]1CCCCN1
Sitosterol beta-D-glucoside	0	Rejected	578.45	0.01	0.054	5.816	-4.605	0.079	CCC(CCC(C)C1CCC2C3CCC4CC(CCC4(C)C3CCC12C)OC1OC(CO)C(O)C(O)C1O)C(C)C
cis-Chlorogenic acid	3	Accepted	354.1	0.111	0.033	0.331	-0.865	0.264	O[C@@H]1C[C@](O)(C[C@@H](OC(=O)\C=C/C2=CC=C(O)C(O)=C2)[C@@H]1O)C(O)=O
Epifriedelin	0	Accepted	426.39	0.24	0.007	7.461	-6.703	0.385	[H][C@@]12CCC(=O)[C@@H](C)[C@@]1(C)CC[C@@]1([H])[C@@]2(C)CC[C@@]2(C)[C@]3([H])CC(C)(C)CC[C@]3(C)CC[C@]12C
1,6-di-O-Galloylglucose	2	Rejected	484.09	0.022	0.137	0.121	-2.112	0.044	[H][C@]1(COC(=O)C2=CC(O)=C(O)C(O)=C2)O[C@@]([H])(OC(=O)C2=CC(O)=C(O)C(O)=C2)[C@]([H])(O)[C@@]([H])(O)[C@]1([H])O
6-Hydroxymusizin 8-O-glucoside	1	Accepted	394.13	0.061	0.624	1.023	-2.204	0.05	CC(=O)C1=C(O)C2=C(C=C(O)C=C2O[C@@H]2O[C@H](CO)[C@@H](O)[C@H](O)[C@H]2O)C=C1C
6-O-Galloylglucose	2	Accepted	332.07	0.044	0.56	-0.874	-1.017	0.258	O[C@@H]1O[C@H](COC(=O)C2=CC(O)=C(O)C(O)=C2)[C@@H](O)[C@H](O)[C@H]1O
Desoxyrhaponticin	1	Accepted	404.15	0.37	0.285	1.393	-3.509	0.158	COC1=CC=C(\C=C\C2=CC(O)=CC(O[C@@H]3O[C@H](CO)[C@@H](O)[C@H](O)[C@H]3O)=C2)C=C1
Magnesium oxalate	1	Accepted	87.98	0.023	0.085	-2.797	-0.22	0.319	[Mg++].[O-]C(=O)C([O-])=O
(+)-Hardwickiic acid	2	Accepted	316.2	0.814	0.007	4.644	-4.603	0.063	CC1CCC2(C)C(CCC=C2C(O)=O)C1(C)CCC1=COC=C1
Eucarvone	1	Accepted	150.1	0.758	0.054	2.799	-2.81	0.907	CC1=CC=CC(C)(C)CC1=O
Kaempferol 3-gluco-rhamnoside	2	Rejected	594.16	0.079	0.81	-0.006	-3.918	0.059	C[C@@H]1O[C@@H](OC2=C(OC3=C(C(O)=CC(O)=C3)C2=O)C2=CC=C(O)C=C2)[C@H](OC[C@H]2O[C@@H](O)[C@H](O)[C@@H](O)[C@@H]2O)[C@H](O)[C@H]1O
Kaempferol 3-gluco-xyloside	1	Rejected	580.14	0.081	0.821	-0.279	-3.256	0.057	OC[C@H]1O[C@@H](OC[C@H]2O[C@@H](OC3=C(OC4=C(C(O)=CC(O)=C4)C3=O)C3=CC=C(O)C=C3)[C@H](O)[C@H]2O)[C@H](O)[C@@H](O)[C@@H]1O
Quercetin 3-gluco-xyloside	2	Rejected	596.14	0.052	0.858	-0.409	-3.157	0.044	OC[C@H]1O[C@@H](OC[C@H]2O[C@@H](OC3=C(OC4=C(C(O)=CC(O)=C4)C3=O)C3=CC(O)=C(O)C=C3)[C@H](O)[C@H]2O)[C@H](O)[C@@H](O)[C@@H]1O
Cyanidin 3-xylosyl-rutinoside	2	Rejected	727.21	0.072	0.604	-0.434	-2.554	0.107	C[C@@H]1O[C@@H](OC[C@H]2O[C@@H](OC3=CC4=C(C=C(O)C=C4O)[O+]=C3C3=CC(O)=C(O)C=C3)[C@H](O)[C@@H](O)[C@@H]2O)[C@H](O)[C@H](O)[C@H]1O[C@@H]1O[C@H](CO)[C@H](O)[C@H]1O
18-Hydroxyoctadecanoic acid	0	Accepted	300.27	0.074	0.005	6.011	-3.871	0.15	OCCCCCCCCCCCCCCCCCC(O)=O
1-S-cis-Calamenene	0	Accepted	202.17	0.516	0.362	5.512	-5.719	0.354	CC(C)[C@@H]1CC[C@H](C)C2=CC=C(C)C=C12
2,5-Dimethylstyrene	1	Accepted	132.09	0.604	0.056	3.772	-3.818	0.944	CC1=CC=C(C)C(C=C)=C1
Oleanolic acid 3-acetate	0	Accepted	498.37	0.12	0.006	7.104	-5.373	0.096	[H][C@@]1(CC[C@@]2(C)[C@@]([H])(CC[C@]3(C)[C@]2([H])CC=C2[C@]4([H])CC(C)(C)CC[C@@]4(CC[C@@]32C)C(O)=O)C1(C)C)OC(C)=O
4'-Methylgenkwanin	1	Accepted	298.08	0.139	0.638	3.993	-4.448	0.031	COC1=CC=C(C=C1)C1=CC(=O)C2=C(O)C=C(OC)C=C2O1
alpha-Fenchyl acetate	0	Accepted	196.15	0.028	0.011	3.172	-2.79	0.758	CC(=O)OC1C2(C)CCC(C2)C1(C)C
beta-Amyrenone	0	Accepted	424.37	0.072	0.022	7.808	-6.728	0.489	CC1(C)CCC2(C)CCC3(C)C(=CCC4C5(C)CCC(=O)C(C)(C)C5CCC34C)C2C1
beta-Thujene	0	Accepted	136.13	0.095	0.029	3.305	-3.892	0.805	CC(C)C12CC1C(C)C=C2
Bornylene	0	Accepted	136.13	0.151	0.008	3.922	-4.314	0.356	CC1(C)C2CCC1(C)C=C2
Carnosolic acid	2	Accepted	348.19	0.05	0.025	3.29	-3.837	0.382	CC(C)C1=CC2=C(C(O)=C1O)C1(CCCC(C)(C)C1CC2O)C(O)=O
cis-Myrtenol	0	Accepted	154.14	0.034	0.003	2.95	-2.03	0.442	[H][C@]12C[C@]([H])([C@@]([H])(CO)CC1)C2(C)C
delta-4-Carene	0	Accepted	136.13	0.039	0.005	3.983	-4.834	0.899	CC1CC2C(C=C1)C2(C)C
Genkwanin	1	Accepted	284.07	0.236	0.572	3.67	-3.724	0.011	COC1=CC(O)=C2C(=O)C=C(OC2=C1)C1=CC=C(O)C=C1
Hispiduloside	1	Rejected	462.12	0.323	0.632	0.521	-3.79	0.185	COC1=C(O)C2=C(OC(=CC2=O)C2=CC=C(O)C=C2)C=C1OC1OC(CO)C(O)C(O)C1O
Mesity alcohol	1	Accepted	136.09	0.387	0.014	2.675	-2.025	0.877	CC1=CC(C)=C(O)C(C)=C1
Methylether	0	Accepted	46.04	0.837	0.067	0.06	0.887	0.858	COC
N-Methylrosmaricine	2	Accepted	359.21	0.041	0.016	3.919	-3.878	0.918	CNC1C2OC(=O)C3(CCCC(C)(C)C23)C2=C(O)C(O)=C(C=C12)C(C)C
Neothujol	0	Accepted	154.14	0.113	0.025	2.326	-2.271	0.958	CC(C)C12CC1C(C)C(O)C2
Sabinyl acetate	0	Accepted	194.13	0.814	0.049	2.168	-2.532	0.931	CC(C)C12CC1C(=C)C(C2)OC(C)=O
Trimethylalkane	0	Accepted	16.03	0.814	0.234	0.256	0.591	0.954	C.C.C.[Al]
2-Hexen-4-olide	1	Accepted	112.05	0.884	0.307	1.673	-0.927	0.252	CCC1OC(=O)C=C1
Lambertianin D	5	Rejected	3738.3	0	0.002	4.752	-1.51	0	OC1=CC(=CC(O)=C1O)C(=O)OC1OC2COC(=O)C3=C(C(O)=C(O)C(O)=C3)C3=C(O)C(O)=C(O)C(OC4=CC(=CC(O)=C4O)C(=O)OC4OC5COC(=O)C6=C(C(O)=C(O)C(O)=C6)C6=C(O)C(O)=C(O)C(OC7=CC(=CC(O)=C7O)C(=O)OC7OC8COC(=O)C9=C(C(O)=C(O)C(O)=C9)C9=C(O)C(O)=C(O)C(OC%10=CC(=CC(O)=C%10O)C(=O)OC%10OC%11COC(=O)C%12=C(C(O)=C(O)C(O)=C%12)C%12=C(O)C(O)=C(O)C=C%12C(=O)OC%11C%11OC(=O)C%12=C(C(O)=C(O)C(O)=C%12)C%12=C(O)C(O)=C(O)C=C%12C(=O)OC…
Anthracene	1	Accepted	178.08	0.861	0.889	4.45	-6.138	0.64	C1=CC2=CC3=CC=CC=C3C=C2C=C1
Chrysophanol-9-anthrone	2	Accepted	240.08	0.716	0.761	4.284	-3.443	0.024	CC1=CC(O)=C2C(=O)C3=C(CC2=C1)C=CC=C3O
Potassium binoxylate	1	Accepted	88.99	0.017	0.034	-2.047	0.146	0.208	[K+].OC(=O)C([O-])=O
2alpha,3alpha-Dihydroxyolean-12-en-28-oic acid	0	Accepted	472.36	0.062	0.008	6.213	-4.509	0.091	[H][C@@]1(O)C[C@@]2(C)C([H])(CC[C@]3(C)[C@]2([H])CC=C2[C@@]4([H])CC(C)(C)CC[C@@]4(CC[C@@]32C)C(O)=O)C(C)(C)[C@]1([H])O
7-O-Acetylhorminone	3	Accepted	374.21	0.225	0.026	4.554	-4.21	0.096	CC(C)C1=C(O)C(=O)C2=C([C@@H](CC3C(C)(C)CCC[C@]23C)OC(C)=O)C1=O
Carnosic acid 12-methyl ether	1	Accepted	346.21	0.051	0.01	5.022	-4.097	0.515	COC1=C(O)C2=C(CCC3C2C(CCC3(C)C)C(O)=O)C=C1C(C)C
Horminone	3	Accepted	332.2	0.118	0.054	4.695	-4.18	0.089	CC(C)C1=C(O)C(=O)C2=C([C@H](O)CC3C(C)(C)CCC[C@]23C)C1=O
19-Hydroxyroyleanone	3	Accepted	332.2	0.638	0.263	3.572	-3.54	0.081	CC(C)C1=C(O)C(=O)C2=C(CC[C@H]3[C@@](C)(CO)CCC[C@]23C)C1=O
Manool	1	Accepted	290.26	0.568	0.009	5.389	-4.57	0.384	CC(O)(CC[C@H]1C(=C)CC[C@H]2C(C)(C)CCC[C@]12C)C=C
Olean-12-en-28-oic acid	0	Accepted	440.37	0.058	0.021	7.886	-5.972	0.133	CC1(C)CCC2(CCC3(C)C(=CCC4C5(C)CCCC(C)(C)C5CCC34C)C2C1)C(O)=O
Pectolinamarigenin	1	Accepted	314.08	0.165	0.575	3.505	-3.751	0.007	COC1=CC=C(C=C1)C1=CC(=O)C2=C(O1)C=C(O)C(OC)=C2O
(+)-Royleanone	3	Accepted	316.2	0.269	0.062	5.089	-4.263	0.069	[H][C@@]12CCC3=C(C(=O)C(O)=C(C(C)C)C3=O)[C@@]1(C)CCCC2(C)C
Salvianolic acid K	3	Rejected	556.12	0.065	0.013	1.135	-4.339	0.035	OC(C(OC1=CC=C(\C=C\C(=O)OC(CC2=CC=C(O)C(O)=C2)C(O)=O)C=C1O)C(O)=O)C1=CC=C(O)C(O)=C1
Salviol	1	Accepted	302.22	0.044	0.032	4.73	-5.045	0.561	CC(C)C1=C(O)C=C2C(CCC3C(C)(C)CC(O)C[C@]23C)=C1
Selin-11-en-4-ol	0	Accepted	222.2	0.063	0.008	4.105	-4.57	0.892	CC(=C)C1CCC2(C)CCC[C@@](C)(O)C2C1
5,11-Selinadiene	0	Accepted	204.19	0.231	0.01	4.743	-4.899	0.403	[H][C@]1(CC[C@@]2(C)CCCC(C)=C2C1)C(C)=C
2-Methylheptane	0	Accepted	114.14	0.077	0.007	4.53	-4.563	0.95	CCCCCC(C)C
24-Methylcycloartenol	0	Accepted	440.4	0.035	0.001	8.501	-6.708	0.069	[H][C@@]12CC[C@]3([H])[C@]4(C[C@@]14CC[C@]1(C)[C@H](CC[C@@]21C)[C@H](C)CCC(C)=C(C)C)CC[C@H](O)C3(C)C
Alkanes	0	Accepted	58.08	0.231	0.008	2.853	-2.557	0.997	C.CCCC
alpha-Hydroxybehenic acid	2	Accepted	356.33	0.067	0.028	7.762	-4.88	0.102	CCCCCCCCCCCCCCCCCCCCC(O)C(O)=O
beta-Amyrin palmitate	0	Rejected	664.62	0.006	0.012	13.511	-8.091	0.196	CCCCCCCCCCCCCCCC(=O)OC1CCC2(C)C(CCC3(C)C2CC=C2C4CC(C)(C)CCC4(C)CCC32C)C1(C)C
But-3-en-2-one	3	Accepted	70.04	0.895	0.926	0.276	0.529	0.968	CC(=O)C=C
Cyanidin 3-O-(6-O-cis-p-coumaroyl-2-O-beta-D-xylopyranosyl)-beta-D-glucopyranoside 5-O-beta-D-glucopyranoside	4	Rejected	889.24	0.067	0.365	0.661	-3.047	0.152	OC[C@H]1O[C@@H](O[C@H]2[C@H](OC3=CC4=C(C=C(O)C=C4O[C@@H]4O[C@H](CO)[C@@H](O)[C@H](O)[C@H]4O)[O+]=C3C3=CC(O)=C(O)C=C3)O[C@H](COC(=O)\C=C\C3=CC=C(O)C=C3)[C@@H](O)[C@@H]2O)[C@H](O)[C@H]1O
Cyanidin 3-O-(6-trans-p-coumaroyl-2-O-beta-D-xylopyranosyl)-beta-D-glucopyranoside	4	Rejected	727.19	0.089	0.706	2.354	-3.582	0.03	OC[C@H]1O[C@@H](O[C@H]2[C@H](OC3=CC4=C(C=C(O)C=C4O)[O+]=C3C3=CC(O)=C(O)C=C3)O[C@H](COC(=O)\C=C\C3=CC=C(O)C=C3)[C@@H](O)[C@@H]2O)[C@H](O)[C@H]1O
1-Heptadecanol	0	Accepted	256.28	0.04	0.006	7.239	-6.631	0.084	CCCCCCCCCCCCCCCCCO
Hexen-2-al	2	Accepted	98.07	0.833	0.457	1.691	-1.49	0.999	CCCC=CC=O
Morroniside	1	Accepted	406.15	0.939	0.13	-0.695	-0.494	0.255	COC(=O)C1=CO[C@@H](O[C@@H]2O[C@H](CO)[C@@H](O)[C@H](O)[C@H]2O)C2[C@H](C)OC(O)CC12
Nigrin B	2	Rejected	506.14	0.032	0.129	1.429	-4.21	0.003	COC1=CC=C(C(O)=C1OC)C1=C(N)C(=NC(C(O)=O)=C1C)C1=CC=C2C(=O)C(OC)=C(N)C(=O)C2=N1
1-Nonadecanol	0	Accepted	284.31	0.034	0.006	8.162	-6.82	0.043	CCCCCCCCCCCCCCCCCCCO
Pentenol	1	Accepted	86.07	0.129	0.021	0.978	-0.39	0.997	OCCCC=C
Quercetin 3-O-2(g)-rhamnosyl-rutinoside	3	Rejected	756.21	0.061	0.807	-0.209	-3.648	0.077	C[C@@H]1O[C@@H](OC[C@H]2O[C@@H](OC3=C(OC4=C(C(O)=CC(O)=C4)C3=O)C3=CC(O)=C(O)C=C3)[C@H](O[C@@H]3O[C@@H](C)[C@H](O)[C@@H](O)[C@H]3O)[C@@H](O)[C@@H]2O)[C@H](O)[C@H](O)[C@H]1O
Quercetin 3-O-neohesperidoside	2	Rejected	610.15	0.046	0.839	-0.049	-4.048	0.043	C[C@@H]1O[C@@H](OC2=C(OC3=CC(O)=CC(O)=C3C2=O)C2=CC(O)=C(O)C=C2)[C@H](O[C@@H]2O[C@H](CO)[C@H](O)[C@H](O)[C@H]2O)[C@H](O)[C@@H]1O
Cyanidin 3-rutinoside	2	Rejected	595.17	0.085	0.756	0.218	-2.969	0.047	[H][C@@]1(C)O[C@@]([H])(OC[C@@]2([H])O[C@@]([H])(OC3=CC4=C(C=C(O)C=C4O)[O+]=C3C3=CC(O)=C(O)C=C3)[C@]([H])(O)[C@@]([H])(O)[C@]2([H])O)[C@]([H])(O)[C@]([H])(O)[C@@]1([H])O
Sylvestrine	0	Accepted	136.13	0.914	0.007	4.408	-4.225	0.991	CC(=C)C1CCC=C(C)C1
5-Demethoxynobiletin	0	Accepted	372.12	0.057	0.285	3.022	-4.755	0.143	COC1=CC=C(C=C1OC)C1=CC(=O)C2=C(O1)C(OC)=C(OC)C(OC)=C2
Polyisoprene	2	Accepted	68.06	0.867	0.1	2.244	-2.19	0.965	CC(=C)C=C
Viridiflorene	0	Accepted	204.19	0.047	0.006	5.128	-5.87	0.747	CC1CCC2=C(C)CCC3C(C12)C3(C)C
1,4-Dimethylnapthalene	0	Accepted	156.09	0.847	0.765	4.329	-4.908	0.765	CC1=CC=C(C)C2=CC=CC=C12
11-Hydroxy-11-methylethyl-6,10-dimethylspiro[4.5]-dec-6-en-8-one	1	Accepted	252.17	0.68	0.034	1.704	-2.413	0.932	CC1CC(=O)C=C(C)C11CCC(C1)C(C)(O)CO
2-(12-O-beta-D-glucosyl-11-hydroxy-11-methylethyl)-6,10-dimethylspiro[4.5]-dec-6-en-8-one	1	Accepted	414.23	0.317	0.181	0.413	-2.242	0.14	CC1CC(=O)C=C(C)C11CCC(C1)C(C)(O)CO[C@@H]1O[C@H](CO)[C@@H](O)[C@H](O)[C@H]1O
2-alpha-Ethoxydihydrophytuberin	0	Accepted	340.22	0.678	0.107	3.104	-3.874	0.131	CCO[C@@H]1C[C@@]2(C)OC[C@]3(C)CC[C@H](C[C@]23O1)C(C)(C)OC(C)=O
2-beta-Ethoxydihydrophytuberin	0	Accepted	340.22	0.561	0.377	3.177	-3.832	0.163	CCO[C@H]1C[C@@]2(C)OC[C@]3(C)CC[C@H](C[C@]23O1)C(C)(C)OC(C)=O
22-Hydroxydocosanoic acid	0	Accepted	356.33	0.045	0.004	7.844	-4.627	0.016	OCCCCCCCCCCCCCCCCCCCCCC(O)=O
24-Hydroxytetracosanoic acid	0	Accepted	384.36	0.037	0.004	8.666	-5.062	0.009	OCCCCCCCCCCCCCCCCCCCCCCCC(O)=O
26-Hydroxyhexacosanoic acid	0	Accepted	412.39	0.032	0.004	9.469	-5.427	0.006	OCCCCCCCCCCCCCCCCCCCCCCCCCC(O)=O
28-Hydroxyoctacosanoic acid	0	Accepted	440.42	0.028	0.004	10.263	-5.822	0.004	OCCCCCCCCCCCCCCCCCCCCCCCCCCCC(O)=O
4alpha,14alpha-Dimethylcholesta-8,24-dien-3beta-ol	0	Accepted	412.37	0.068	0.008	7.307	-6.794	0.089	C[C@H](CCC=C(C)C)C1CC[C@@]2(C)C3=C(CC[C@]12C)[C@@]1(C)CC[C@H](O)[C@@H](C)C1CC3
6,10-Dimethylspiro[4.5]-dec-6-en-2,8-dione	1	Accepted	192.12	0.828	0.162	1.36	-2.161	0.961	CC1CC(=O)C=C(C)C11CCC(=O)C1
9-Hydroxynonanoic acid	0	Accepted	174.13	0.137	0.005	1.311	-1.238	0.979	OCCCCCCCCC(O)=O
Acetyl dehydrorishitinol	0	Accepted	258.16	0.937	0.014	4.185	-4.062	0.863	CC(=O)OC(C)(C)C1=CCC2=C(C1)C(C)=CC=C2C
beta-2-Chaconine	0	Rejected	705.45	0.112	0.114	3.245	-3.87	0.031	CC1C2CCC(C)CN2C2CC3C4CC=C5CC(CCC5(C)C4CCC3(C)C12)OC1OC(CO)C(OC2OC(C)C(O)C(O)C2O)C(O)C1O
beta-Carotene-5,6-monoepoxide	2	Rejected	552.43	0.623	0.459	8.931	-6.07	0.004	C/C(/C=C/C=C(/C)\C=C/C1=C(C)CCCC1(C)C)=C/C=C/C=C(\C)/C=C/C=C(/C)\C=C\C12OC1(C)CCCC2(C)C
cis-Neoxanthin	2	Accepted	600.42	0.928	0.339	4.831	-5.009	0.67	[H]C(=C=C1C(C)(C)C[C@]([H])(O)C[C@@]1(C)O)C(\C)=C(/[H])\C(\[H])=C(/[H])\C(\C)=C(/[H])\C(\[H])=C(/[H])\C(\[H])=C(/C)\C(\[H])=C(/[H])\C(\[H])=C(\C)/C(/[H])=C(\[H])[C@@]12O[C@]1(C)C[C@@]([H])(O)CC2(C)C
cis-Violaxanthin	2	Accepted	600.42	0.954	0.422	4.981	-4.862	0.257	C/C(/C=C/C=C(/C)\C=C\C12OC1(C)CC(O)CC2(C)C)=C\C=C\C=C(/C)\C=C\C=C(/C)\C=C\C12OC1(C)CC(O)CC2(C)C
Diazepam	1	Accepted	284.07	0.039	0.009	2.823	-4.073	0.998	CN1C2=C(C=C(Cl)C=C2)C(=NCC1=O)C1=CC=CC=C1
Docosan-1-ol	0	Accepted	326.35	0.027	0.006	9.466	-7.056	0.017	CCCCCCCCCCCCCCCCCCCCCCO
Eicosan-1-ol	0	Accepted	298.32	0.032	0.006	8.617	-6.898	0.031	CCCCCCCCCCCCCCCCCCCCO
Eicosyl ferulate	2	Accepted	474.37	0.044	0.012	10.178	-7.011	0.013	[H]\C(=C(/[H])C1=CC(OC)=C(O)C=C1)C(=O)OCCCCCCCCCCCCCCCCCCCC
Isodityrosine	1	Accepted	360.13	0.291	0.025	-1.94	-3.065	0.055	N[C@@H](CC1=CC=C(OC2=C(O)C=CC(CC(N)C(O)=O)=C2)C=C1)C(O)=O
Kaempferol 3-sophoroside-rhamnoside	2	Rejected	756.21	0.047	0.408	-0.728	-3.27	0.225	C[C@@H]1O[C@@H](OC2=C(OC3=C(C(O)=CC(O)=C3)C2=O)C2=CC=C(O)C=C2)[C@H](O)[C@H](O)[C@H]1O[C@@H]1O[C@H](CO)[C@@H](O)[C@H](O)[C@H]1O[C@@H]1O[C@H](CO)[C@@H](O)[C@H](O)[C@H]1O
Kaempferol 3-triglucoside 7-rhamnoside	1	Rejected	918.26	0.067	0.248	-1.621	-2.566	0.296	C[C@@H]1O[C@@H](OC2=CC3=C(C(O)=C2)C(=O)C(O[C@@H]2O[C@H](CO[C@@H]4O[C@H](CO[C@@H]5O[C@H](CO)[C@@H](O)[C@H](O)[C@H]5O)[C@@H](O)[C@H](O)[C@H]4O)[C@@H](O)[C@H](O)[C@H]2O)=C(O3)C2=CC=C(O)C=C2)[C@H](O)[C@H](O)[C@H]1O
Lormetazepam	1	Accepted	334.03	0.034	0.014	2.772	-3.475	0.998	CN1C2=C(C=C(Cl)C=C2)C(=NC(O)C1=O)C1=CC=CC=C1Cl
N-Demethyldiazepam	1	Accepted	270.06	0.097	0.252	3.651	-5.479	0.965	ClC1=CC=C2NC(=O)CN=C(C3=CC=CC=C3)C2=C1
Nonacosanoic acid	0	Accepted	438.44	0.021	0.004	11.924	-7.13	0.003	CCCCCCCCCCCCCCCCCCCCCCCCCCCCC(O)=O
Octacosanoic acid	0	Accepted	424.43	0.023	0.004	11.535	-7.06	0.003	CCCCCCCCCCCCCCCCCCCCCCCCCCCC(O)=O
Octacosyl ferulate	2	Rejected	586.5	0.024	0.014	13.349	-7.579	0.002	[H]\C(=C(\[H])C1=CC(OC)=C(O)C=C1)C(=O)OCCCCCCCCCCCCCCCCCCCCCCCCCCCC
Octadecendioic acid	0	Accepted	314.25	0.137	0.004	5.881	-3.409	0.005	[O-]C(=O)CCCCCCCCCCCCCCCCC([O-])=O
Octadecyl ferulate	2	Accepted	446.34	0.051	0.013	9.386	-6.826	0.021	[H]\C(=C(\[H])C1=CC(OC)=C(O)C=C1)C(=O)OCCCCCCCCCCCCCCCCCC
Oxyglutinosone	0	Accepted	236.14	0.533	0.261	2.004	-3.223	0.987	CC1C(O)C(=O)C=C2CCC(CC12O)C(C)=C
Phellogenic acid	0	Accepted	370.31	0.081	0.004	7.647	-3.624	0.002	OC(=O)CCCCCCCCCCCCCCCCCCCCC(O)=O
Phospholipase	1	Accepted	343.09	0.077	0.005	4.482	-4.549	0.523	CC1=CC(C)=C(C(C)=C1)S(=O)(=O)NC1=CC=CC(=C1)C(F)(F)F
Risbitin	0	Accepted	222.16	0.772	0.046	2.593	-2.616	0.655	[H]O[C@]1([H])C([H])([H])C2=C(C([H])([H])[C@]([H])(C(=C([H])[H])C([H])([H])[H])C([H])([H])C2([H])[H])[C@]([H])(C([H])([H])[H])[C@@]1([H])O[H]
Solanthrene	0	Accepted	381.34	0.193	0.077	6.614	-6.054	0.699	C[C@@H]1C2CC[C@H](C)CN2C2CC3C4CC=C5CCCCC5(C)C4CCC3(C)C12
Solasodiene	0	Accepted	395.32	0.053	0.025	5.825	-5.597	0.756	CC1C2C(CC3C4CC=C5C=CCCC5(C)C4CCC23C)OC11CCC(C)CN1
Tetracosanedioic acid	0	Accepted	398.34	0.06	0.004	8.461	-3.691	0.002	OC(=O)CCCCCCCCCCCCCCCCCCCCCCC(O)=O
trans-Octen-2-al	2	Accepted	126.1	0.783	0.716	2.307	-2.42	0.999	[H]\C(CCCCC)=C(\[H])C=O
Tritriacontanone	1	Accepted	478.51	0.013	0.006	13.465	-7.766	0.001	CCCCCCCCCCCCCCCCCCCCCCCCCCCCCCCC(C)=O
Tuberoside F	1	Rejected	1078.56	0.033	0.082	-0.814	-1.911	0.091	COC1(C)C2C(CC3C4CCC5CC(OC6OC(CO)C(OC7OC(C)C(O)C(O)C7O)C(O)C6OC6OC(C)C(O)C(O)C6O)C(O)CC5(C)C4CCC23C)O\C1=C/CC(C)COC1OC(CO)C(O)C(O)C1O
Tuberosin	1	Accepted	338.12	0.93	0.952	3.748	-4.542	0.06	CC1(C)OC2=CC3=C(C=C2C=C1)[C@@]1(O)COC2=C(C=CC(O)=C2)[C@H]1O3
24(28)-Dehydromakisterone	0	Accepted	492.31	0.539	0.139	1.725	-3.101	0.364	[H][C@@]1(CC[C@@]2(O)C3=CC(=O)[C@]4([H])C[C@@H](O)[C@@H](O)C[C@]4(C)C3CC[C@]12C)[C@@](C)(O)[C@H](O)CC(=C)C(C)(C)O
Celosianin	4	Rejected	872.21	0.247	0.005	-0.768	-0.439	0.185	OC[C@H]1OC(OC2=C(O)C=C3C(C[C@@H](C([O-])=O)[N+]3=C\C=C3/C[C@H]([NH2+]C(=C3)C([O-])=O)C([O-])=O)=C2)[C@H](OC2O[C@@H]([C@@H](O)[C@H](O)[C@H]2OC(=O)\C=C/C2=CC=C(O)C=C2)C([O-])=O)[C@@H](O)[C@@H]1O
Ecdysone	0	Accepted	464.31	0.141	0.053	1.975	-3.262	0.257	C[C@H]([C@H](O)CCC(C)(C)O)[C@H]1CC[C@@]2(O)C3=CC(=O)[C@@H]4C[C@@H](O)[C@@H](O)C[C@]4(C)[C@H]3CC[C@]12C
Hexadeca-7,10,13-trienoic acid	0	Accepted	250.19	0.102	0.195	5.299	-4.228	0.39	CCC=CCC=CCC=CCCCCCC(O)=O
Hexadecatrienoic acid	2	Accepted	250.19	0.341	0.559	5.7	-4.116	0.749	CCCCCCCCCC=CC=CC=CC(O)=O
Pheophytin A	2	Rejected	868.55	0.115	0.175	11.62	-6.259	0.003	CCC1=C(C)\C2=C\C3=N\C(=C/C4=N/C(/C(CCC(=O)OC\C=C(/C)CCCC(C)CCCC(C)CCCC(C)C)C4C)=C4/C(C(=O)OC)C(=O)C5=C(C)\C(=C\C1=N2)N=C45)\C(C)=C3C=C
Phytylplastoquinol	2	Accepted	416.37	0.015	0.018	9	-5.262	0.849	CC(C)CCC[C@@H](C)CCC[C@@H](C)CCC\C(C)=C\CC1=C(O)C(C)=C(C)C(O)=C1
Polypodine B	0	Accepted	496.3	0.014	0.119	0.904	-2.563	0.919	CC(C)(O)CCC(O)C(C)(O)C1CCC2(O)C3=CC(=O)C4(O)CC(O)C(O)CC4(C)C3CCC12C
2-Heptyl acetate	0	Accepted	158.13	0.358	0.009	3.079	-2.302	0.991	CCCCCC(C)OC(C)=O
3-Methoxybenzaldehyde	1	Accepted	136.05	0.052	0.032	1.673	-1.874	0.991	COC1=CC(C=O)=CC=C1
4,4-Dimethyltricyclo[6.3.2.0]-trideca-8-ene-1-ol	0	Accepted	220.18	0.948	0.017	3.851	-3.67	0.563	[H][C@]1(C)C[C@@]2([H])C1(C)CCC1=CCCC2(O)CC1
beta-Muurolene	0	Accepted	206.2	0.492	0.112	6.265	-5.834	0.414	[H][C@]12CC=C(C)C[C@@]1([H])[C@@H](CCC2C)C(C)C
Methylfurfuryl alcohol	1	Accepted	112.05	0.861	0.101	0.503	-0.276	0.721	CC(O)C1=CC=CO1
Orsellinic acid 2-O-beta-D-glucoside	1	Accepted	330.1	0.02	0.047	-1.099	-1.142	0.594	CC1=CC(O)=CC(OC2OC(CO)C(O)C(O)C2O)=C1C(O)=O
Palustrol	0	Accepted	222.2	0.03	0.011	4.404	-5.115	0.946	CC1CCC2(O)C1C1C(CCC2C)C1(C)C
Procyanidin	2	Rejected	594.14	0.056	0.269	1.845	-3.897	0.013	OC1C(O)C(OC2CC3=C(O)C=C(O)C=C3OC2C2=CC=C(O)C(O)=C2)(OC2=CC(O)=CC(O)=C12)C1=CC=C(O)C(O)=C1
Pterocarinin A	3	Rejected	1068.13	0.001	0.054	0.963	-2.32	0	OC1COC(O)(C(O)C1O)C1C2OC(=O)C3=C(C(O)=C(O)C(O)=C13)C1=C(C=C(O)C(O)=C1O)C(=O)OC2C1OC(=O)C2=C(C(O)=C(O)C(O)=C2)C2=C(C=C(O)C(O)=C2O)C(=O)OCC1OC(=O)C1=CC(O)=C(O)C(O)=C1
Rugosin A	4	Rejected	1106.11	0.007	0.032	2.126	-2.377	0	OC(=O)C1=C(OC2=CC3=C(C(O)=C2O)C2=C(C=C(O)C(O)=C2O)C(=O)OC2C(COC3=O)OC(OC(=O)C3=CC(O)=C(O)C(O)=C3)C(OC(=O)C3=CC(O)=C(O)C(O)=C3)C2OC(=O)C2=CC(O)=C(O)C(O)=C2)C(O)=C(O)C(O)=C1
Rugosin D	5	Rejected	1874.19	0.001	0.015	2.88	-1.076	0	OC1=CC(=CC(O)=C1O)C(=O)OC1OC2COC(=O)C3=C(C(O)=C(O)C(OC4=C(O)C(O)=C(O)C=C4C(=O)OC4OC5COC(=O)C6=C(C(O)=C(O)C(O)=C6)C6=C(C=C(O)C(O)=C6O)C(=O)OC5C(OC(=O)C5=CC(O)=C(O)C(O)=C5)C4OC(=O)C4=CC(O)=C(O)C(O)=C4)=C3)C3=C(C=C(O)C(O)=C3O)C(=O)OC2C(OC(=O)C2=CC(O)=C(O)C(O)=C2)C1OC(=O)C1=CC(O)=C(O)C(O)=C1
Rugosin E	5	Rejected	1722.18	0.001	0.019	2.498	-1.487	0	OC1OC2COC(=O)C3=C(C(O)=C(O)C(OC4=C(O)C(O)=C(O)C=C4C(=O)OC4OC5COC(=O)C6=C(C(O)=C(O)C(O)=C6)C6=C(C=C(O)C(O)=C6O)C(=O)OC5C(OC(=O)C5=CC(O)=C(O)C(O)=C5)C4OC(=O)C4=CC(O)=C(O)C(O)=C4)=C3)C3=C(C=C(O)C(O)=C3O)C(=O)OC2C(OC(=O)C2=CC(O)=C(O)C(O)=C2)C1OC(=O)C1=CC(O)=C(O)C(O)=C1
Zonarene	0	Accepted	204.19	0.599	0.011	4.65	-4.607	0.213	CC(C)C1=C2C=C(C)CCC2[C@@H](C)CC1
3,5-Dimethylphenol	1	Accepted	122.07	0.156	0.009	2.555	-1.561	0.286	CC1=CC(O)=CC(C)=C1
Calcium tartrate	2	Accepted	148	0.009	0.063	-1.688	-0.407	0.464	[Ca++].OC(C(O)C([O-])=O)C([O-])=O
Glycoxylic acid	2	Accepted	74	0.045	0.218	-0.689	0.602	0.73	OC(=O)C=O
Methoxyl	0	Accepted	31.02	0.615	0.035	-0.482	1.033	0.95	C[O]
Methylglutamic acid	0	Accepted	146.06	0.033	0.008	0.32	-0.061	0.217	CC(CCC([O-])=O)C([O-])=O
Isorhamnetin 3,7-beta-D-diglucoside	1	Rejected	640.16	0.051	0.718	-0.536	-3.561	0.138	COC1=C(O)C=CC(=C1)C1=C(O[C@@H]2O[C@H](CO)[C@@H](O)[C@H](O)[C@H]2O)C(=O)C2=C(O1)C=C(O[C@@H]1O[C@H](CO)[C@@H](O)[C@H](O)[C@H]1O)C=C2O
31-Norcycloartenol	0	Accepted	412.37	0.199	0.004	7.94	-6.694	0.075	[H][C@@]12CC[C@]3([H])[C@@]4(C[C@]14CC[C@H](O)C2C)CC[C@]1(C)[C@H](CC[C@@]31C)[C@H](C)CCC=C(C)C
31-Nordehydrolanosterol	0	Accepted	396.34	0.073	0.003	7.698	-6.766	0.029	[H][C@@]12CC[C@H]([C@H](C)CCC=C(C)C)[C@@]1(C)CC=C1C2=CC[C@@]2([H])C(C)[C@@H](O)CC[C@]12C
Androsterol	0	Accepted	274.23	0.68	0.008	4.475	-4.754	0.464	[H][C@@]12CC=C3C[C@@H](O)CC[C@]3(C)C1CC[C@]1(C)CCCC21
Lutein ester	1	Rejected	568.43	0.03	0.036	5.771	-4.556	0.001	O[C@@H]1CC(C)=C(\C=C\C(\C)=C\C=C\C(\C)=C\C=C\C=C(/C)\C=C\C=C(/C)\C=C\[C@H]2C(C)=CC(O)CC2(C)C)C(C)(C)C1
Taraxacine	2	Accepted	242.09	0.894	0.234	3.203	-3.769	0.004	CC1=CC(=O)C2=C(C)CC3OC(=O)C(C)=C3C=C12
Violaxanthin linoleate linolenate	2	Rejected	1122.86	0.467	0.427	10.963	-0.272	0.289	CCCCC\C=C/C\C=C/CCCCCCCC(=O)O[C@@H]1C[C@@]2(C)O[C@@]2(\C=C\C(\C)=C\C=C\C(\C)=C\C=C\C=C(/C)\C=C\C=C(/C)\C=C\[C@@]23O[C@]2(C)C[C@@H](OC(=O)CCCCCCC\C=C/C\C=C/C\C=C/CC)CC3(C)C)C(C)(C)C1
alpha-Sitosterol	0	Accepted	414.39	0.023	0.003	7.76	-7.295	0.182	[H][C@@]12CC=C3C[C@H](O)CC[C@]3(C)C1CC[C@]1(C)[C@H](CCC21)[C@H](C)CC[C@@H](CC)C(C)C
Hydrolase	3	Rejected	610.25	0.024	0.008	1.702	-3.32	0.006	CC(NC(=O)CCC(O)=O)C(=O)NC(C)C(=O)N1CCCC1C(=O)NC(CC1=CC=CC=C1)C(=O)SCC1=CC=CC=C1
Oleopalmitostearin	1	Rejected	874.8	0.026	0.065	17.302	-3.563	0	CCCCCCCCCCCCCCCCCC(=O)OCC(COC(=O)CCCCCCCCCCCCCCC)OCC(=O)CCCCCCC\C=C/CCCCCCCC
Oxalates	1	Accepted	120.02	0.259	0.989	-2.23	0.215	0.264	[NH3+]OC(=O)C(=O)O[NH3+]
Oxaluric acid	1	Accepted	132.02	0.007	0.031	-1.65	-0.785	0.98	OC(=N)N=C(O)C(O)=O
Palmitodiolen	0	Rejected	858.77	0.024	0.012	16.179	-2.081	0	CCCCCCCCCCCCCCCC(=O)OCC(COC(=O)CCCCCCC\C=C/CCCCCCCC)OC(=O)CCCCCCC\C=C/CCCCCCCC
Purine	0	Accepted	120.04	0.045	0.111	-0.343	0.217	0.657	N1C=NC2=C1C=NC=N2
Verbascotetrose	0	Rejected	666.22	0.005	0.086	-5.219	0.785	0.43	OCC1OC(OCC2OC(OCC3OC(OCC4OC(O)C(O)C(O)C4O)C(O)C(O)C3O)C(O)C(O)C2O)C(O)C(O)C1O
4-Hydroxybenzoyl glucose	1	Accepted	300.08	0.048	0.084	-0.369	-1.276	0.418	[H][C@]1(CO)O[C@@]([H])(OC(=O)C2=CC=C(O)C=C2)[C@]([H])(O)[C@@]([H])(O)[C@]1([H])O
6'-Hydroxylutein	1	Accepted	584.42	0.514	0.038	4.714	-4.908	0.092	O[C@@H]1CC(C)=C(\C=C\C(\C)=C\C=C\C(\C)=C\C=C\C=C(/C)\C=C\C=C(/C)\C=C\[C@@]2(O)C(C)=C[C@H](O)CC2(C)C)C(C)(C)C1
8-Demethylthymonin	3	Accepted	348.08	0.271	0.028	1.871	-3.496	0.004	COC1=C(O)C=CC(=C1)C1CC(=O)C2=C(O1)C(O)=C(OC)C(O)=C2O
8-Methoxycirsilineol	1	Accepted	374.1	0.059	0.401	2.912	-4.016	0.005	COC1=C(O)C=CC(=C1)C1=CC(=O)C2=C(O)C(OC)=C(OC)C(OC)=C2O1
Thujan-4-ol	0	Accepted	154.14	0.113	0.025	2.326	-2.271	0.958	CC(C)C12CC1C(C)C(O)C2
Thymunic acid	1	Accepted	150.1	0.287	0.053	3.153	-2.147	0.814	CC(C)C1=C(O)C=C(C)C=C1
cis-trans-Farnesyl acetate	0	Accepted	264.21	0.077	0.002	4.84	-4.612	0.78	[H]\C(CC\C(C)=C(\[H])COC(C)=O)=C(\C)CCC=C(C)C
Kaempferol 3-(p-coumaroyl-glucoside)	2	Rejected	594.14	0.172	0.766	2.954	-4.52	0.014	O[C@@H]1[C@@H](COC(=O)\C=C\C2=CC=C(O)C=C2)O[C@@H](OC2=C(OC3=C(C(O)=CC(O)=C3)C2=O)C2=CC=C(O)C=C2)[C@H](O)[C@H]1O
2-Methylthio-3-isopropylpyrazine	0	Accepted	168.07	0.204	0.123	2.124	-1.456	0.937	CSC1=C(N=CC=N1)C(C)C
3beta-Hydroxypregna-5,16-dien-20-one	2	Accepted	314.22	0.908	0.017	4.035	-4.456	0.219	[H][C@@]12CC=C(C(C)=O)[C@@]1(C)CC[C@@]1([H])[C@@]2([H])CC=C2C[C@@]([H])(O)CC[C@]12C
Dihydrobenzofuran	0	Accepted	192.08	0.501	0.218	2.33	-2.462	0.969	CCOC(=O)C1CC2=CC=CC=C2O1
Fenugrin A	0	Accepted	350.19	0.026	0.061	6.267	-6.792	0.292	CC(C)=CC1C(C(=O)OCC2=CC=CC(OC3=CC=CC=C3)=C2)C1(C)C
Fenugrin E	0	Accepted	178.07	0.038	0.208	0.775	-1.616	0.999	NC(=O)NC(=O)CC1=CC=CC=C1
Furost-5-ene-3beta,22,26-triol	0	Accepted	418.31	0.311	0.013	3.639	-4.941	0.6	C[C@H]1C2C(CC3C4CC=C5C[C@@H](O)CC[C@]5(C)C4CC[C@]23C)O[C@]1(O)CCCCO
Gentianine	1	Accepted	175.06	0.537	0.036	1.496	-2.178	0.904	C=CC1=C2CCOC(=O)C2=CN=C1
Neotigonenin	0	Accepted	416.33	0.027	0.05	5.444	-5.947	0.792	CC1C2C(CC3C4CCC5CC(O)CCC5(C)C4CCC23C)OC11CCC(C)CO1
Spirosta-3,5-diene	0	Accepted	396.3	0.267	0.013	6.109	-6.461	0.263	C[C@H]1[C@H]2[C@H](CC3C4CC=C5C=CCC[C@]5(C)C4CC[C@]23C)O[C@]11CCC(C)CO1
1,3-Diferuloylglycerol	2	Accepted	444.14	0.337	0.18	2.975	-3.878	0.724	COC1=CC(C=CC(=O)OCC(O)COC(=O)C=CC2=CC=C(O)C(OC)=C2)=CC=C1O
8-Methoxycoumarin	1	Accepted	176.05	0.919	0.585	1.525	-2.259	0.228	COC1=CC=CC2=C1OC(=O)C=C2
Dechlorodiazepam	1	Accepted	250.11	0.035	0.013	2.138	-3.096	0.992	CN1C2=C(C=CC=C2)C(=NCC1=O)C1=CC=CC=C1
Ethyl beta-D-fructofuranoside	0	Accepted	208.09	0.06	0.246	-1.376	0.003	0.312	[H][C@@]1(O)[C@@]([H])(CO)O[C@@](CO)(OCC)[C@@]1([H])O
Laminarase	0	Accepted	226.11	0.017	0.022	-2.888	-0.791	0.862	NCCC(=O)NC(CC1=CNC=N1)C(O)=O
Prolamine	0	Accepted	71.07	0.067	0.089	0.257	0.918	0.894	C1CCNC1
Ribonuclease	0	Accepted	226.11	0.017	0.022	-2.888	-0.791	0.862	NCCC(=O)NC(CC1=CNC=N1)C(O)=O
Uridine	0	Accepted	244.07	0.028	0.039	-1.968	-0.933	0.844	OCC1OC(C(O)C1O)N1C=CC(O)=NC1=O
Cyanidin 3-O-alpha-L-arabinoside	2	Accepted	419.1	0.07	0.82	1.465	-4.033	0.013	OC[C@@H]1O[C@@H](OC2=CC3=C(C=C(O)C=C3O)[O+]=C2C2=CC(O)=C(O)C=C2)[C@H](O)[C@H]1O
Cyanidin 3-O-alpha-L-galactoside	2	Rejected	449.11	0.075	0.785	0.654	-3.842	0.025	OC[C@@H]1O[C@@H](OC2=CC3=C(C=C(O)C=C3O)[O+]=C2C2=CC(O)=C(O)C=C2)[C@@H](O)[C@H](O)[C@@H]1O
Malvidin 3-alpha-L-galactoside	2	Accepted	487.16	0.148	0.672	3.07	-3.562	0.022	COC1=C(C)C(C=C)=CC(=C1)C1=[O+]C2=C(C=C1O[C@H]1O[C@@H](CO)[C@@H](O)[C@@H](O)[C@@H]1O)C(O)=CC(O)=C2
6-O-Benzoyl-alpha-D-glucose	0	Accepted	284.09	0.027	0.106	-0.274	-1.443	0.665	OC1OC(COC(=O)C2=CC=CC=C2)C(O)C(O)C1O
Caffeic acid 3-glucoside	2	Accepted	342.1	0.101	0.154	-0.324	-1.106	0.256	[H]\C(=C(\[H])C1=CC(O[C@]2([H])O[C@]([H])(CO)[C@@]([H])(O)[C@]([H])(O)[C@@]2([H])O)=C(O)C=C1)C(O)=O
Leptosine	3	Rejected	740.12	0.756	0.018	2.495	-2.993	0.678	CC(C)C12SSSSC3(C4OC56C(O)C7(C(NC8=CC=CC=C78)N5C(=O)C(CO)N(C)C6=O)C44C(NC5=CC=CC=C45)N3C1=O)C(=O)N2C
2-Hydroxy-3-methylbutanoic acid ethyl ester	0	Accepted	146.09	0.021	0.018	0.85	-0.68	0.935	CCOC(=O)C(O)C(C)C
Asperuloside	1	Accepted	414.12	0.918	0.554	0.259	-1.359	0.208	CC(=O)OCC1=C[C@@H]2OC(=O)C3=CO[C@@H](O[C@@H]4O[C@H](CO)[C@@H](O)[C@H](O)[C@H]4O)[C@H]1[C@H]23
Monotropeoside	0	Rejected	446.14	0.055	0.185	-0.431	-1.653	0.198	[H][C@@]1(O)CO[C@@]([H])(OC[C@@]2([H])O[C@@]([H])(OC3=CC=CC=C3C(=O)OC)[C@]([H])(O)[C@@]([H])(O)[C@]2([H])O)[C@]([H])(O)[C@@]1([H])O
(+)-Verbenone	0	Accepted	150.1	0.622	0.015	2.429	-2.433	0.963	CC1=CC(=O)C2CC1C2(C)C
Artemitin	1	Accepted	388.12	0.033	0.262	2.852	-4.397	0.026	COC1=CC2=C(C(O)=C1OC)C(=O)C(OC)=C(O2)C1=CC(OC)=C(OC)C=C1
Invertin	1	Accepted	444.15	0.136	0.007	0.463	-1.069	0.04	O.[H][C@]1(C)C2=C(C(O)=CC=C2)C(=O)C2=C(O)[C@]3(O)C(=O)C(C(O)=N)=C(O)[C@@]([H])(N(C)C)[C@]3([H])[C@@]([H])(O)[C@]12[H]
Terpenene	0	Accepted	136.13	0.723	0.02	3.092	-2.989	0.451	CC(C)C1=CC=C(C)CC1
Verbenalol	1	Accepted	226.08	0.735	0.018	-0.485	-1.297	0.775	[H][C@@]12[C@@H](C)CC(=O)[C@]1([H])C(=CO[C@H]2O)C(=O)OC
2,6-Diaminopurine	0	Accepted	150.07	0.463	0.844	-2.432	-2.701	0.604	NC1=NC2=C(NC=N2)C(N)=N1
5-Hydroxyuracil	0	Accepted	128.02	0.077	0.067	-1.322	-1.286	0.018	OC1=CNC(=O)NC1=O
beta-Cyanoalanine	1	Accepted	114.04	0.454	0.042	-2.799	-0.794	0.548	NC(CC#N)C(O)=O
Convicine	0	Rejected	305.09	0.029	0.179	-2.354	-1.967	0.149	NC1=C(O[C@@H]2O[C@H](CO)[C@@H](O)[C@H](O)[C@H]2O)C(=O)NC(=O)N1
Kaempferol 3-rhamnosyl-(6''-acetyl)galactoside 7-rhamnoside	1	Rejected	782.23	0.089	0.763	0.495	-4.334	0.118	C[C@@H]1O[C@@H](O[C@H]2[C@@H](COC(C)=O)O[C@@H](OC3=C(OC4=C(C(O)=CC(O[C@@H]5O[C@@H](C)[C@H](O)[C@@H](O)[C@H]5O)=C4)C3=O)C3=CC=C(O)C=C3)[C@H](O)[C@H]2O)[C@H](O)[C@H](O)[C@H]1O
Quercetin 3-(6''-acetyl-galactoside) 7-rhamnoside	2	Rejected	652.16	0.097	0.852	0.592	-4.89	0.049	C[C@@H]1O[C@@H](OC2=CC3=C(C(O)=C2)C(=O)C(O[C@@H]2O[C@H](COC(C)=O)[C@H](O)[C@H](O)[C@H]2O)=C(O3)C2=CC(O)=C(O)C=C2)[C@H](O)[C@H](O)[C@H]1O
Cellobiose	0	Rejected	342.12	0.016	0.144	-2.591	-0.383	0.264	OC[C@H]1O[C@@H](O[C@H]2[C@H](O)[C@@H](O)[C@H](O)O[C@@H]2CO)[C@H](O)[C@@H](O)[C@@H]1O
Diethylstilbesterol	1	Accepted	268.15	0.124	0.03	4.039	-3.724	0.107	CCC(=C(CC)C1=CC=C(O)C=C1)C1=CC=C(O)C=C1
Adenosine diphosphate-D-ribose	1	Rejected	559.07	0.416	0.098	-3.577	-0.049	0.445	NC1=NC=NC2=C1N=CN2C1O[C@H](COP(O)(=O)OP(O)(=O)OC[C@H]2O[C@@H](O)[C@H](O)[C@@H]2O)[C@@H](O)[C@H]1O
Imidazoleacrylic acid	1	Accepted	138.04	0.025	0.016	0.057	-0.238	0.527	OC(=O)\C=C\C1=CNC=N1
3,7-Dimethyl-octa-1,7-dien-3,6-diol	1	Accepted	170.13	0.062	0.011	1.071	-0.859	0.959	CC(=C)C(O)CCC(C)(O)C=C
3-Oxo-beta-damascone	1	Accepted	206.13	0.859	0.552	2.332	-2.519	0.886	C\C=C\C(=O)C1=C(C)CC(=O)CC1(C)C
3-Oxo-olean-12-en-28-oic acid	0	Accepted	454.34	0.17	0.01	5.953	-5.53	0.673	[H]C12CC(C)(C)CC[C@@]1(CC[C@]1(C)C2=CCC2([H])[C@@]3(C)CCC(=O)C(C)(C)C3([H])CC[C@@]12C)C(O)=O
9-Hydroxymegastigma-4,6,7-trien-3-one	1	Accepted	206.13	0.828	0.051	2.193	-1.856	0.191	CC(O)C=C=C1C(C)=CC(=O)CC1(C)C
alpha-3-Oxo-damascone	1	Accepted	206.13	0.859	0.552	2.332	-2.519	0.886	C\C=C\C(=O)[C@@H]1C(C)=CC(=O)CC1(C)C
3-Oxo-alpha-lonone	2	Accepted	206.13	0.865	0.485	1.952	-2.188	0.974	CC(=O)\C=C\C1C(C)=CC(=O)CC1(C)C
Benzyl 6-O-beta-D-apiofuranosyl-beta-D-glucoside	0	Accepted	402.15	0.062	0.438	-0.337	-1.784	0.148	OC[C@@]1(O)CO[C@@H](OC[C@H]2O[C@@H](OCC3=CC=CC=C3)[C@H](O)[C@@H](O)[C@@H]2O)[C@@H]1O
Benzyl alcohol beta-D-rutinoside	0	Accepted	416.17	0.082	0.407	-0.097	-1.601	0.088	C[C@@H]1O[C@@H](OC[C@H]2O[C@@H](OCC3=CC=CC=C3)[C@H](O)[C@@H](O)[C@@H]2O)[C@H](O)[C@H](O)[C@H]1O
beta-Phenylethanol beta-D-rutinoside	0	Accepted	430.18	0.079	0.338	-0.026	-1.617	0.07	C[C@@H]1O[C@@H](OC[C@H]2O[C@@H](OCCC3=CC=CC=C3)[C@H](O)[C@@H](O)[C@@H]2O)[C@H](O)[C@H](O)[C@H]1O
Brevilagin I	5	Rejected	816.07	0.007	0.052	0.657	-1.787	0.128	OC[C@H]1O[C@H]2OC(=O)C3=C(C4C(=O)C(O)(O)C(=O)C=C4C(=O)O[C@H]4[C@@H]1OC(=O)C1=CC(=O)C(O)(O)C(=O)C1C1=C(C=C(O)C(O)=C1O)C(=O)O[C@@H]24)C(O)=C(O)C(O)=C3
cis-Caftaric acid	6	Accepted	312.05	0.065	0.01	-0.368	-1.093	0.462	[H]\C(=C(/[H])C1=CC(O)=C(O)C=C1)C(=O)O[C@]([H])(C(O)=O)[C@@]([H])(O)C(O)=O
Dihydrofuran I	0	Accepted	70.04	0.961	0.087	0.251	-0.293	0.99	C1CC=CO1
Elemol acetate	1	Accepted	264.21	0.026	0.007	4.538	-4.881	0.753	CC(=O)OCC1CCC(C)(C=C)C(C(C)=C)C1(C)C
Epicatechin-(4beta->8)-epicatechin-(4beta->6)-catechin	2	Rejected	866.21	0.022	0.191	4.207	-4.866	0	O[C@H]1CC2=C(O[C@@H]1C1=CC=C(O)C(O)=C1)C=C(O)C([C@@H]1[C@@H](O)[C@H](OC3=C1C(O)=CC(O)=C3[C@@H]1[C@@H](O)[C@H](OC3=C1C(O)=CC(O)=C3)C1=CC=C(O)C(O)=C1)C1=CC=C(O)C(O)=C1)=C2O
Epicatechin-(4beta->8)-epicatechin-(4beta->8)-catechin	2	Rejected	866.21	0.017	0.149	4.097	-5.358	0	O[C@H]1CC2=C(O[C@@H]1C1=CC=C(O)C(O)=C1)C([C@@H]1[C@@H](O)[C@H](OC3=C1C(O)=CC(O)=C3[C@@H]1[C@@H](O)[C@H](OC3=C1C(O)=CC(O)=C3)C1=CC=C(O)C(O)=C1)C1=CC=C(O)C(O)=C1)=C(O)C=C2O
Luteoxanthin	2	Accepted	600.42	0.694	0.16	4.439	-4.783	0.346	C\C(\C=C\C=C(/C)\C=C\C12OC1(C)CC(O)CC2(C)C)=C/C=C/C=C(\C)/C=C/C=C(\C)C1OC2(C)CC(O)CC(C)(C)C2=C1
Malvidin 3-caffeoyl-glucoside	4	Rejected	649.19	0.124	0.706	4.214	-3.662	0.006	COC1=C(C)C(C=C)=CC(=C1)C1=[O+]C2=C(C=C1O[C@@H]1O[C@H](COC(=O)\C=C\C3=CC=C(O)C(O)=C3)[C@@H](O)[C@H](O)[C@H]1O)C(O)=CC(O)=C2
Malvidin 3-chlorogenic acid glucoside	4	Rejected	823.24	0.105	0.717	3.308	-2.859	0.027	COC1=C(C)C(C=C)=CC(=C1)C1=[O+]C2=C(C=C1O[C@@H]1O[C@H](COC(=O)[C@]3(O)C[C@@H](O)[C@@H](O)[C@@H](C3)OC(=O)\C=C\C3=CC=C(O)C(O)=C3)[C@@H](O)[C@H](O)[C@H]1O)C(O)=CC(O)=C2
Oleanolic acid methyl ester	0	Accepted	470.38	0.032	0.027	6.852	-5.636	0.584	COC(=O)C12CCC(C)(C)CC1C1=CCC3C4(C)CCC(O)C(C)(C)C4CCC3(C)C1(C)CC2
(-)-trans-Isomenth-5-en-2-ol	0	Accepted	154.14	0.551	0.056	2.965	-2.003	0.651	CC(C)[C@@H]1C[C@H](O)[C@@H](C)C=C1
1,2-Dimethyl-4-ethylbenzene	0	Accepted	134.11	0.395	0.042	4.136	-4.297	0.91	CCC1=CC(C)=C(C)C=C1
1,3-Dimethyl-4-ethylbenzene	0	Accepted	134.11	0.395	0.044	4.067	-4.109	0.93	CCC1=C(C)C=C(C)C=C1
(S)-(+)-1-(p-Hydroxy-trans-cinnamoyl)-glycerol	2	Accepted	238.08	0.482	0.101	1.172	-0.816	0.918	[H]C(O)(CO)COC(=O)\C=C\C1=CC=C(O)C=C1
2H-1,4-Benzoxazin-3(4H)-one	1	Accepted	149.05	0.713	0.701	1.157	-2.288	0.871	O=C1COC2=C(N1)C=CC=C2
5-Chloro-2-hydroxy-7-methoxy-2H-1,4-benzoxazin-3(4H)-one beta-D-glucopyranoside	1	Accepted	391.07	0.39	0.595	-0.051	-1.854	0.193	COC1=CC2=C(NC(=O)C(O[C@@H]3O[C@H](CO)[C@@H](O)[C@H](O)[C@H]3O)O2)C(Cl)=C1
2-Methylnaphthalene	0	Accepted	142.08	0.821	0.536	3.833	-4.338	0.761	CC1=CC=C2C=CC=CC2=C1
2-Methylpentan-3-one	1	Accepted	100.09	0.051	0.055	1.284	-0.54	0.993	CCC(=O)C(C)C
6,10,14-Trimethylpentadecan-2-one	1	Accepted	268.28	0.039	0.003	6.477	-6.454	0.634	CC(C)CCCC(C)CCCC(C)CCCC(C)=O
Apigenidin	1	Accepted	255.07	0.484	0.25	3.649	-3.431	0.013	OC1=CC=C(C=C1)C1=[O+]C2=C(C=C1)C(O)=CC(O)=C2
Bazzanene	0	Accepted	204.19	0.384	0.01	4.611	-4.906	0.348	CC1=CC[C@@](C)(CC1)[C@@]1(C)CCCC1=C
Chelidonic acid	0	Accepted	184	0.026	0.031	0.728	-1.122	0.045	OC(=O)C1=CC(=O)C=C(O1)C(O)=O
Cyanidin 3-galactoside p-coumaric acid ester	3	Rejected	595.14	0.125	0.741	3.177	-4.131	0.01	O[C@H]1[C@@H](COC(=O)\C=C\C2=CC=C(O)C=C2)O[C@@H](OC2=CC3=C(C=C(O)C=C3O)[O+]=C2C2=CC(O)=C(O)C=C2)[C@H](O)[C@H]1O
Cystathione	0	Accepted	222.07	0.187	0.028	-4.346	-2.089	0.357	NC(CCSCC(N)C(O)=O)C(O)=O
Decan-2-ol	0	Accepted	158.17	0.064	0.01	3.702	-2.672	0.919	CCCCCCCCC(C)O
Ethyl methyl amine	0	Accepted	59.07	0.049	0.011	0.373	1.091	0.651	CCNC
Fluorene	0	Accepted	166.08	0.768	0.721	4.04	-4.996	0.713	C1C2=CC=CC=C2C2=CC=CC=C12
Hept-4-en-2-ol	0	Accepted	100.09	0.164	0.009	0.963	-0.42	0.982	C\C=C\CC(C)O
Isobehenic acid	0	Accepted	340.33	0.036	0.004	8.983	-6.556	0.017	CC(C)CCCCCCCCCCCCCCCCCCC(O)=O
Isorhamnetin 3-neohesperoside	1	Rejected	624.17	0.042	0.813	0.301	-3.955	0.062	[H][C@@]1(C)O[C@@]([H])(O[C@@]2([H])[C@]([H])(OC3=C(OC4=CC(O)=CC(O)=C4C3=O)C3=CC(OC)=C(O)C=C3)O[C@]([H])(CO)[C@@]([H])(O)[C@]2([H])O)[C@]([H])(O)[C@]([H])(O)[C@@]1([H])O
Octa-3-5-dien-2-one	2	Accepted	124.09	0.774	0.093	1.143	-1.257	0.969	CC\C=C\C=C\C(C)=O
Pent-1-en-2-ol	1	Accepted	86.07	0.109	0.007	0.75	-0.282	0.996	CCCC(O)=C
trans-24-Methyl-23-dehydrolophenol	0	Accepted	412.37	0.117	0.003	7.995	-7.025	0.389	[H][C@@]12CC=C3C4CC[C@H]([C@H](C)CC=C(C)C(C)C)[C@@]4(C)CCC3[C@@]1(C)CC[C@H](O)[C@H]2C
Xylene	0	Accepted	106.08	0.59	0.033	3.118	-3.011	0.93	CC1=CC=C(C)C=C1.CC1=CC(C)=CC=C1.CC1=CC=CC=C1C
(+)-Angelicoidenol	0	Accepted	170.13	0.089	0.031	1.335	-1.624	0.768	CC1(C)C2CC(O)C1(C)CC2O
1,5-Epoxy-3-hydroxy-1-(3,4-dihydroxy-5-methoxyphenyl)-7-(4-hydroxy-3-methoxyphenyl)-heptane	2	Accepted	390.17	0.194	0.122	1.901	-3.822	0.06	COC1=CC(=CC(O)=C1O)C1CC(O)CC(CCC2=CC(OC)=C(O)C=C2)O1
1,5-Epoxy-3-hydroxy-1-(4-hydroxy-3,5-dimethoxyphenyl)-7-(4-hydroxy-3-methoxyphenyl)-heptane	1	Accepted	404.18	0.119	0.04	2.255	-4.488	0.096	COC1=CC(=CC(OC)=C1O)C1CC(O)CC(CCC2=CC(OC)=C(O)C=C2)O1
1-(4-Hydroxy-3-methoxyphenyl)-3,5-diacetoxyoctane	1	Accepted	352.19	0.46	0.012	2.936	-2.885	0.818	CCCC(CC(CCC1=CC(OC)=C(O)C=C1)OC(C)=O)OC(C)=O
1-(4-O-beta-D-glucopyranosyl-3-methoxyphenyl)-3,5-dihydroxydecane	0	Accepted	454.29	0.046	0.049	4.174	-4.535	0.038	CCCCCC(C)CC(C)CCC1=CC(OC)=C(O[C@@H]2O[C@H](CO)[C@@H](O)[C@H](O)[C@H]2O)C=C1
1,7-bis-(4-Hydroxy-3-methoxyphenyl)-heptane-3,5-diol	1	Accepted	376.19	0.092	0.073	2.183	-3.972	0.124	COC1=CC(CCC(O)CC(O)CCC2=CC(OC)=C(O)C=C2)=CC=C1O
10-Dehydrogingerdione	3	Accepted	346.21	0.527	0.468	4.58	-4.583	0.556	CCCCCCCCCC(=O)\C=C(/O)\C=C/C1=CC(OC)=C(O)C=C1
10-Epizonarene	0	Accepted	204.19	0.458	0.009	4.992	-4.782	0.138	[H][C@@]12CCC(C)=CC1=C(CC[C@H]2C)C(C)C
10-Gingerdione	2	Accepted	348.23	0.053	0.335	4.261	-4.168	0.783	CCCCCCCCCC(=O)\C=C(/O)CCC1=CC(OC)=C(O)C=C1
[10]-Shogaol	2	Accepted	332.24	0.242	0.047	5.596	-4.8	0.805	CCCCCCCCC\C=C\C(=O)CCC1=CC(OC)=C(O)C=C1
[12]-Gingerdiol	1	Accepted	380.29	0.037	0.019	5.711	-5.069	0.133	CCCCCCCCCCCC(O)CC(O)CCC1=CC(OC)=C(O)C=C1
[14]-Gingerol	2	Accepted	406.31	0.036	0.066	6.487	-5.075	0.487	CCCCCCCCCCCCCC(O)CC(=O)CCC1=CC(OC)=C(O)C=C1
[16]-Gingerol	2	Accepted	434.34	0.031	0.048	7.413	-5.031	0.134	CCCCCCCCCCCCCCCC(O)CC(=O)CCC1=CC=C(O)C(OC)=C1
2,2,4-Trimethylheptane	0	Accepted	142.17	0.049	0.005	5.223	-5.549	0.851	CCCC(C)CC(C)(C)C
2,6-Dimethylocta-3,7-diene-1,6-diol	1	Accepted	170.13	0.019	0.006	1.052	-1.393	0.997	[H]OC\C(C)=C\CCC(C)(O[H])C=C
(3R)-Acetoxy-(5S)-hydroxy-1-(4-hydroxy-3-methoxyphenyl)-decane	1	Accepted	338.21	0.34	0.03	3.679	-3.702	0.654	CCCCC[C@H](O)C[C@@H](CCC1=CC=C(O)C(OC)=C1)OC(C)=O
3-Epiacetoxy-1,5-epoxy-1-(3,4-dihydroxy-5-methoxyphenyl)-7-(4-hydroxy-3-methoxyphenyl)-heptane	2	Accepted	432.18	0.219	0.055	2.243	-3.794	0.033	COC1=CC(CCC2CC(CC(O2)C2=CC(OC)=C(O)C(O)=C2)OC(C)=O)=CC=C1O
3-Phenyl benzaldehyde	1	Accepted	182.07	0.429	0.423	3.309	-4.361	0.392	O=CC1=CC=CC(=C1)C1=CC=CC=C1
4-Phenylbenzaldehyde	1	Accepted	182.07	0.668	0.688	3.318	-4.35	0.359	O=CC1=CC=C(C=C1)C1=CC=CC=C1
[6]-Gingerdiol acetate methyl ether	0	Accepted	352.22	0.115	0.006	3.58	-4.239	0.663	CCCCCC(CC(O)CCC1=CC(OC)=C(OC)C=C1)OC(C)=O
6-Methylgingediol	0	Accepted	310.21	0.073	0.009	3.218	-4.198	0.688	CCCCCC(O)CC(O)CCC1=CC(OC)=C(OC)C=C1
[8]-Shogaol	2	Accepted	276.17	0.682	0.052	3.609	-3.633	0.287	CCCCCC=CC(=O)CCC1=CC(OC)=C(O)C=C1
[9]-Gingerol	2	Accepted	336.23	0.045	0.13	4.047	-4.409	0.92	CCCCCCCCC(O)CC(=O)CCC1=CC=C(O)C(OC)=C1
Angelicoidenol 2-O-beta-D-glucopyranoside	0	Accepted	332.18	0.047	0.206	-0.486	-1.325	0.378	CC1(C)C2CC(OC3OC(CO)C(O)C(O)C3O)C1(C)CC2O
Camphene-hydrate	0	Accepted	154.14	0.074	0.005	2.882	-2.73	0.912	CC1(C)C2CCC(C2)C1(C)O
Cedorol	0	Accepted	222.2	0.051	0.002	4.197	-4.62	0.128	[H][C@@]1(C)CC[C@@]2([H])C(C)(C)[C@@]3([H])C[C@@]12CC[C@@]3(C)O
cis-[10]-Shogaol	2	Accepted	332.24	0.242	0.047	5.596	-4.8	0.805	CCCCCCCCC\C=C\C(=O)CCC1=CC(OC)=C(O)C=C1
cis-[6]-Shogaol	2	Accepted	276.17	0.682	0.052	3.609	-3.633	0.287	CCCCCC=CC(=O)CCC1=CC(OC)=C(O)C=C1
cis-[8]-Shogaol	2	Accepted	304.2	0.448	0.05	4.552	-4.306	0.752	CCCCCCC\C=C\C(=O)CCC1=CC(OC)=C(O)C=C1
cis-Selinen-4-ol	0	Accepted	222.2	0.057	0.005	3.91	-4.474	0.292	[H][C@]1(CC[C@@]2(C)CCC[C@@](C)(O)[C@]2([H])C1)C(C)=C
cis-Sesquisabinene hydrate	0	Accepted	222.2	0.182	0.004	4.181	-4.392	0.451	CC(CCC=C(C)C)[C@]12CC1[C@](C)(O)CC2
Ethyl isopropyl sulfide	0	Accepted	104.07	0.798	0.067	2.488	-1.922	0.946	CCSC(C)C
Glyoxal	2	Accepted	58.01	0.906	0.966	-0.714	0.489	0.998	O=CC=O
Juniper camphor	0	Accepted	222.2	0.143	0.006	4.319	-3.802	0.447	CC(C)=C1CCC2(C)CCCC(C)(O)C2C1
Methyl-[10]-gingerol	1	Accepted	364.26	0.041	0.014	4.721	-4.983	0.961	CCCCCCCCCC(O)CC(=O)CCC1=CC=C(OC)C(OC)=C1
Methyl-[10]-shogaol	1	Accepted	346.25	0.213	0.008	5.844	-5.239	0.821	CCCCCCCCC\C=C\C(=O)CCC1=CC(OC)=C(OC)C=C1
Methyl-[12]-gingerdiol	0	Accepted	394.31	0.033	0.007	5.982	-5.755	0.144	CCCCCCCCCCCC(O)CC(O)CCC1=CC(OC)=C(OC)C=C1
Methyl-[12]-gingerol	1	Accepted	392.29	0.038	0.01	5.755	-5.396	0.903	CCCCCCCCCCCC(O)CC(=O)CCC1=CC=C(OC)C(OC)=C1
Methyl-[8]-gingerol	1	Accepted	336.23	0.038	0.019	3.885	-4.396	0.975	CCCCCCCC(O)CC(=O)CCC1=CC=C(OC)C(OC)=C1
p-Mentha-1,5-dien-7-ol	0	Accepted	152.12	0.366	0.095	2.208	-1.91	0.984	CC(C)C1CC=C(CO)C=C1
Patchouli alcohol	0	Accepted	222.2	0.734	0.004	3.737	-3.339	0.383	C[C@H]1CCC2(O)C(C)(C)C3CC[C@@]2(C)C1C3
Perillene	1	Accepted	150.1	0.701	0.01	4.014	-3.89	0.689	CC(C)=CCCC1=COC=C1
trans-[6]-Shogaol	2	Accepted	180.08	0.104	0.135	0.844	-1.567	0.873	COCOC(C=O)C1=CC=CC=C1
trans-beta-Sesquiphellandrol	0	Accepted	220.18	0.683	0.041	4.206	-3.49	0.971	CC(CCC=C(C)C)C1CC(O)C(=C)C=C1
Zerumbodienone	2	Accepted	206.17	0.789	0.051	4.129	-4.486	0.138	CCC(=O)\C=C\[C@@H]1C(=C)CCCC1(C)C
Zingiberol	0	Accepted	236.21	0.05	0.014	3.984	-4.13	0.952	CC(C)(O)CC1CCC2(C)CCCC(=C)C2C1
1(F)-beta-Fructosyl-sucrose	0	Rejected	490.15	0.009	0.08	-2.98	-0.356	0.27	OC[C@H]1O[C@@](O)(OC[C@@]2(O[C@H]3O[C@H](CO)[C@@H](O)[C@H](O)[C@H]3O)O[C@H](CO)[C@@H](O)[C@@H]2O)[C@@H](O)[C@@H]1O
2,3-Dimethyl-5,6-dithia-bicyclo[2.1.1]-hexane-5-oxide	0	Accepted	146.02	0.576	0.036	2.542	-2.387	0.864	CC1C2SC(S2)C1C
31-Norlanostenol	0	Accepted	414.39	0.04	0.01	7.599	-6.895	0.065	[H][C@@]12CCC3=C(CC[C@]4(C)[C@H](CC[C@@]34C)[C@H](C)CCCC(C)C)[C@@]1(C)CC[C@H](O)C2C
4alpha-Methylzymostenol	0	Accepted	400.37	0.089	0.006	7.643	-7.007	0.254	[H][C@@]12CCC3=C(CC[C@]4(C)C(CCC34)[C@H](C)CCCC(C)C)[C@@]1(C)CC[C@H](O)[C@H]2C
Alliospiroside A	0	Rejected	708.41	0.104	0.104	2.359	-3.878	0.048	CC1C2C(CC3C4CC=C5CC(O)CC(OC6OCC(O)C(O)C6OC6OC(C)C(O)C(O)C6O)C5(C)C4CCC23C)OC11CCC(C)CO1
Alliospiroside B	0	Rejected	738.42	0.091	0.101	1.96	-3.636	0.049	CC1C2C(CC3C4CC=C5CC(O)CC(OC6OC(CO)C(O)C(O)C6OC6OC(C)C(O)C(O)C6O)C5(C)C4CCC23C)OC11CCC(C)CO1
Allylpropyl sulfide	2	Accepted	116.07	0.816	0.059	2.632	-2.251	0.989	CCCSCC=C
cis-3,5-Diethyl-1,2,4-trithiolane	0	Accepted	180.01	0.815	0.016	2.932	-3.233	0.53	CC[C@H]1SS[C@@H](CC)S1
Dimethyl furan	1	Accepted	96.06	0.836	0.068	2.238	-1.942	0.763	CC1=C(C)C=CO1
Eicosen-1-ol	1	Accepted	296.31	0.071	0.016	8.281	-6.679	0.263	CCCCCCCCCCCCCCCCCC\C=C\O
gamma-L-Glutamyl-S-(1-propenyl)-cysteine sulfoxide	2	Accepted	306.09	0.224	0.035	-3.188	-1.201	0.069	C\C=C\S(=O)C[C@H](NC(=O)CC[C@H](N)C(O)=O)C(O)=O
1-Hexadecenol	0	Accepted	240.25	0.063	0.029	5.263	-3.656	0.425	CCCC\C=C/CCCCCCCCCCO
Isopropyl propyl disulfide	1	Accepted	150.05	0.602	0.406	3.328	-3.287	0.905	CCCSSC(C)C
Isopropyl propyl trisulfide	0	Accepted	196.04	0.373	0.481	3.473	-5.249	0.823	CCCSSSCC(C)C
Kaempferol 3-O-sophoroside 7-O-glucuronide	1	Rejected	786.19	0.048	0.189	-1.206	-2.73	0.279	OC[C@H]1O[C@@H](O[C@@H]2[C@@H](O)[C@H](O)[C@@H](CO)O[C@H]2OC2=C(OC3=C(C(O)=CC(O[C@@H]4O[C@@H]([C@@H](O)[C@H](O)[C@H]4O)C(O)=O)=C3)C2=O)C2=CC=C(O)C=C2)[C@H](O)[C@@H](O)[C@@H]1O
Methyl-cis-propenyl disulfide	1	Accepted	120.01	0.162	0.593	2.099	-2.558	0.882	CSS\C=C/C
Methyl-cis-propenyl trisulfide	0	Accepted	151.98	0.154	0.736	1.781	-3.572	0.73	CSSS\C=C/C
Methylpropenyl trisulfide	0	Accepted	151.98	0.124	0.81	1.997	-4.109	0.752	CSSS\C=C\C
Methylpropyl tetrasulfide	0	Accepted	214	0.29	0.737	3.009	-5.218	0.91	CCCSSSSCCC
Neodecanoic acid	0	Accepted	172.15	0.044	0.01	3.336	-2.791	0.359	CCC(C)(CCC(C)C)C(O)=O
cis-Propenyl propyl disulfide	1	Accepted	148.04	0.23	0.622	2.932	-2.969	0.936	CCCSS\C=C/C
cis-Propenyl propyl trisulfide	0	Accepted	180.01	0.191	0.775	2.665	-3.935	0.838	CCCSSS\C=C/C
trans-Propenyl propyl disulfide	1	Accepted	148.04	0.125	0.369	3.203	-3.473	0.874	CCCSS\C=C\C
trans-Propenyl propyl trisulfide	0	Accepted	180.01	0.137	0.714	2.913	-4.502	0.794	CCCSSS\C=C\C
Quercetin 3-O-sophoroside 7-O-glucuronide	2	Rejected	802.18	0.049	0.271	-1.437	-1.821	0.191	OC[C@H]1O[C@@H](O[C@@H]2[C@@H](O)[C@H](O)[C@@H](CO)O[C@@H]2OC2=C(OC3=C(C(O)=CC(O[C@@H]4O[C@@H]([C@@H](O)[C@H](O)[C@H]4O)C(O)=O)=C3)C2=O)C2=CC(O)=C(O)C=C2)[C@H](O)[C@@H](O)[C@@H]1O
Selenohomocystine	0	Accepted	363.94	0.232	0.314	-3.772	-2.01	0.555	NC(CC[Se][Se]CCC(N)C(O)=O)C(O)=O
Selenomethyl selenocysteine	0	Accepted	182.98	0.262	0.888	-2.437	-1.514	0.768	C[Se]CC(N)C(O)=O
trans-3,5-Diethyl-1,2,4,-trithiolane	0	Accepted	180.01	0.677	0.009	2.764	-2.683	0.257	CC[C@H]1SS[C@H](CC)S1
Tuliposide A	1	Accepted	278.1	0.029	0.168	-1.531	-0.204	0.301	[H][C@]1(O)[C@]([H])(O)[C@@]([H])(CO)O[C@@]([H])(OC(=O)C(=C)CCO)[C@]1([H])O
Tuliposide B	1	Accepted	294.1	0.021	0.122	-2.245	-0.082	0.32	[H]C(O)(CO)C(=C)C(=O)O[C@]1([H])O[C@]([H])(CO)[C@@]([H])(O)[C@]([H])(O)[C@@]1([H])O
(11S,13)-Dihydro-8-deoxylactucin	2	Accepted	262.12	0.583	0.009	1.592	-2.477	0.2	[H]C1CC(C)=C2C(=O)C=C(CO)[C@]2([H])[C@H]2OC(=O)C(C)C12
Cichoriolide A	1	Accepted	248.14	0.761	0.152	1.375	-2.872	0.891	CC1=C2C3OC(=O)C(=C)C3CCC2(C)CCC1O
Lactupicrin methyl ester	3	Accepted	456.18	0.022	0.011	1.906	-3.346	0.025	COC(=O)C(=C)C1C(O)C2C(CO)=CC(=O)C2=C(C)CC1(C)OC(=O)CC1=CC=C(O)C=C1
Norharman	2	Accepted	168.07	0.116	0.497	2.481	-2.591	0.966	N1C2=CC=CC=C2C2=C1C=NC=C2
Ponticaepoxide	5	Accepted	182.07	0.528	0.472	3.872	-4.496	0.002	CC#CC#CC#C\C=C/C1OC1C=C
Sonchuside C	0	Accepted	412.21	0.095	0.202	0.269	-2.272	0.194	CC1C2CCC3(C)CCC(OC4OC(CO)C(O)C(O)C4O)C(C)=C3C2OC1=O
7-Demethyltangeretin	1	Accepted	358.11	0.106	0.532	3.229	-4.505	0.02	COC1=CC=C(C=C1)C1=CC(=O)C2=C(O1)C(OC)=C(O)C(OC)=C2OC
Apigenin 7-O-beta-D-galactomannoside	1	Rejected	594.16	0.371	0.64	-0.136	-3.178	0.106	OC[C@H]1O[C@@H](OC[C@H]2O[C@@H](OC3=CC4=C(C(O)=C3)C(=O)C=C(O4)C3=CC=C(O)C=C3)[C@H](O)[C@@H](O)[C@@H]2O)[C@@H](O)[C@@H](O)[C@H]1O
Apigenin 7-O-beta-D-rutinoside	1	Rejected	578.16	0.183	0.728	1.061	-3.898	0.074	C[C@@H]1O[C@@H](O[C@@H]2[C@@H](O)[C@H](O)[C@@H](CO)O[C@H]2OC2=CC3=C(C(O)=C2)C(=O)C=C(O3)C2=CC=C(O)C=C2)[C@H](O)[C@H](O)[C@H]1O
beta-Glucuronidase	0	Accepted	226.11	0.017	0.022	-2.888	-0.791	0.862	NCCC(=O)NC(CC1=CNC=N1)C(O)=O
cis-beta-Bergamotene	0	Accepted	204.19	0.044	0.004	5.297	-5.19	0.197	CC(C)=CCC[C@]1(C)[C@H]2C[C@@H]1C(=C)CC2
Cyanidin 3,5-digalactoside	2	Rejected	611.16	0.039	0.689	-0.363	-2.497	0.097	OC[C@H]1O[C@@H](OC2=CC(O)=CC3=C2C=C(O[C@@H]2O[C@H](CO)[C@H](O)[C@H](O)[C@H]2O)C(=[O+]3)C2=CC(O)=C(O)C=C2)[C@H](O)[C@@H](O)[C@H]1O
Cyanidin 3-(sinapoyl-xylosyl-glucosyl)-galactoside	3	Rejected	949.26	0.047	0.643	0.572	-2.009	0.054	COC1=CC(\C=C\C(=O)OC[C@H]2O[C@@H](OC[C@H]3O[C@@H](OC[C@H]4O[C@@H](OC5=CC6=C(C=C(O)C=C6O)[O+]=C5C5=CC(O)=C(O)C=C5)[C@H](O)[C@@H](O)[C@H]4O)[C@H](O)[C@@H](O)[C@@H]3O)[C@H](O)[C@H]2O)=CC(OC)=C1O
Cyanidin 3-glucogalactoside	2	Rejected	611.16	0.068	0.674	-0.492	-2.065	0.068	OC[C@H]1O[C@@H](OC[C@H]2O[C@@H](OC3=CC4=C(C=C(O)C=C4O)[O+]=C3C3=CC(O)=C(O)C=C3)[C@H](O)[C@@H](O)[C@H]2O)[C@H](O)[C@@H](O)[C@@H]1O
Dec-2-en-1-al	0	Accepted	156.15	0.141	0.012	3.641	-2.734	0.899	CCCCCCCC=CCO
Luteolin 7-O-(6''-O-malonyl)-beta-D-diglucoside	2	Rejected	696.15	0.146	0.711	-0.148	-3.02	0.062	O[C@H]1[C@H](O)[C@@H](COC(=O)CC(O)=O)O[C@@H](OC[C@H]2O[C@@H](OC3=CC4=C(C(O)=C3)C(=O)C=C(O4)C3=CC(O)=C(O)C=C3)[C@H](O)[C@@H](O)[C@@H]2O)[C@@H]1O
Luteolin 7-O-beta-rutinoside	2	Rejected	594.16	0.321	0.79	0.466	-3.12	0.056	C[C@@H]1O[C@@H](OC[C@H]2OC(OC3=CC4=C(C(O)=C3)C(=O)C=C(O4)C3=CC(O)=C(O)C=C3)[C@H](O)[C@@H](O)[C@@H]2O)[C@H](O)[C@H](O)[C@H]1O
trans-Isoasarone	0	Accepted	208.11	0.126	0.21	2.268	-2.969	0.787	COC1=CC(OC)=C(\C=C\C)C=C1OC
Zosimin	2	Accepted	328.13	0.88	0.201	3.669	-3.909	0.022	C\C=C(\C)C(=O)OC(C)(C)[C@H]1OC2=C(C1)C1=C(C=C2)C=CC(=O)O1
2,10-Di-(gamma,gamma-dimethylallyl)-glycinol	1	Accepted	408.19	0.233	0.248	6.49	-3.057	0.023	[H][C@@]12OC3=C(C=CC(O)=C3CC=C(C)C)[C@]1(O)COC1=C2C=C(CC=C(C)C)C(O)=C1
4-(gamma,gamma-Dimethylallyl)-phaseollidin	1	Accepted	392.2	0.074	0.253	7.423	-2.769	0.058	[H][C@@]12COC3=C(CC=C(C)C)C(O)=CC=C3[C@]1([H])OC1=C2C=CC(O)=C1CC=C(C)C
Irigenin	1	Accepted	360.08	0.033	0.092	2.306	-3.602	0.005	COC1=CC(=CC(O)=C1OC)C1=COC2=CC(O)=C(OC)C(O)=C2C1=O
N-Acetylglucosamine	0	Accepted	221.09	0.008	0.171	-2.04	-0.065	0.27	CC(=O)N[C@H]1C(O)O[C@H](CO)[C@@H](O)[C@@H]1O
Quercetin 3-diglucoside	2	Rejected	626.15	0.055	0.802	-0.793	-3.128	0.066	OC[C@H]1O[C@@H](OC[C@H]2O[C@@H](OC3=C(OC4=C(C(O)=CC(O)=C4)C3=O)C3=CC(O)=C(O)C=C3)[C@H](O)[C@@H](O)[C@@H]2O)[C@H](O)[C@@H](O)[C@@H]1O
Glycerol sinapate	2	Rejected	710.22	0.075	0.108	4.146	-5.509	0.007	COC1=CC(C=CC(=O)OCC(COC(=O)C=CC2=CC(OC)=C(O)C(OC)=C2)OC(=O)C=CC2=CC(OC)=C(O)C(OC)=C2)=CC(OC)=C1O
Sperminidine	0	Accepted	145.16	0.024	0.045	-1.117	0.899	0.19	NCCCCNCCCN
3,5-Dimethyl-1,2,4-trithiolane	0	Accepted	151.98	0.496	0.023	1.992	-1.384	0.842	CC1SSC(C)S1
Dipropyl disulfide	1	Accepted	150.05	0.381	0.121	3.212	-3.925	0.906	CCCSSCCC
1,3-Dithiane	0	Accepted	120.01	0.215	0.9	1.79	-1.672	0.912	C1CSCSC1
1,4-Dithiane	0	Accepted	120.01	0.928	0.796	1.508	-1.794	0.934	C1CSCCS1
Heptanal	1	Accepted	114.1	0.296	0.398	2.169	-1.789	0.991	CCCCCCC=O
2,3-Heptanedione	2	Accepted	128.08	0.093	0.398	1.351	-1.405	0.99	CCCCC(=O)C(C)=O
Heptanoic acid	0	Accepted	130.1	0.23	0.007	2.379	-1.862	0.874	CCCCCCC(O)=O
Methyl heptanoate	0	Accepted	144.12	0.271	0.01	2.83	-2.523	0.997	CCCCCCC(=O)OC
1-Heptanol	0	Accepted	116.12	0.171	0.008	2.473	-1.832	0.989	CCCCCCCO
Heptyl acetate	0	Accepted	158.13	0.249	0.008	3.307	-2.585	0.992	CCCCCCCOC(C)=O
2-Heptanone	1	Accepted	114.1	0.115	0.007	1.881	-1.519	0.998	CCCCCC(C)=O
3-Heptanol	0	Accepted	116.12	0.098	0.009	2.341	-1.56	0.965	CCCCC(O)CC
3-Heptanone	1	Accepted	114.1	0.043	0.018	1.863	-1.281	0.997	CCCCC(=O)CC
4-Heptanone	1	Accepted	114.1	0.046	0.026	1.772	-1.268	0.997	CCCC(=O)CCC
(E)-2-Heptenal	2	Accepted	112.09	0.829	0.792	1.649	-1.849	0.999	CCCC\C=C\C=O
(Z)-4-Heptenal	1	Accepted	112.09	0.299	0.501	0.8	-1.963	0.983	CC\C=C/CCC=O
Ammonium acetate	0	Accepted	60.02	0.033	0.02	-0.18	0.888	0.923	[NH4+].CC([O-])=O
3-Hepten-2-one	1	Accepted	112.09	0.554	0.007	1.662	-1.378	0.992	CCC\C=C\C(C)=O
2-Hepten-4-one	2	Accepted	112.09	0.891	0.203	1.808	-1.56	0.997	CCCC(=O)\C=C\C
Hexanal	1	Accepted	100.09	0.185	0.556	1.552	-1.244	0.984	CCCCCC=O
(Â±)-1,5-Hexanediol	0	Accepted	118.1	0.059	0.011	0.01	0.784	0.581	CC(O)CCCCO
2,3-Hexanedione	2	Accepted	114.07	0.057	0.464	0.898	-0.972	0.991	CCCC(=O)C(C)=O
3,4-Hexanedione	2	Accepted	114.07	0.073	0.708	1.093	-1.332	0.992	CCC(=O)C(=O)CC
1-Hexanol	0	Accepted	102.1	0.244	0.009	1.949	-1.333	0.991	CCCCCCO
3-Hexanol	0	Accepted	102.1	0.083	0.009	1.653	-0.949	0.951	CCCC(O)CC
5-Methyl-delta-valerolactone	0	Accepted	114.07	0.732	0.041	1.079	-1.377	0.992	CC1CCCC(=O)O1
(Â±)-Tetrahydro-6-methyl-2H-pyran-2-one	0	Accepted	114.07	0.732	0.041	1.079	-1.377	0.992	CC1CCCC(=O)O1
2-Hexanone	1	Accepted	100.09	0.12	0.007	1.292	-0.972	0.998	CCCCC(C)=O
2-Hexenal	2	Accepted	98.07	0.833	0.457	1.691	-1.49	0.999	CCCC=CC=O
3-Hexenal	1	Accepted	98.07	0.321	0.962	1.446	-0.785	0.982	CCC=CCC=O
(Z)-3-Hexenal	1	Accepted	98.07	0.503	0.97	0.589	-1.661	0.98	CC\C=C/CC=O
(E)-2-Hexenoic acid	0	Accepted	114.07	0.176	0.01	1.819	-0.735	0.844	CCC\C=C\C(O)=O
Methyl 2E-hexenoate	0	Accepted	128.08	0.868	0.022	2.144	-1.909	0.988	CCC\C=C\C(=O)OC
(Z)-2-Hexenoic acid	0	Accepted	114.07	0.176	0.01	1.819	-0.735	0.844	CCC\C=C\C(O)=O
(E)-2-Hexen-1-ol	0	Accepted	100.09	0.147	0.004	1.36	-1.661	0.995	CCC\C=C\CO
(Z)-3-Hexen-1-ol	0	Accepted	100.09	0.359	0.032	0.671	-1.296	0.997	CC\C=C/CCO
(E)-4-Hexen-1-ol	0	Accepted	100.09	0.421	0.056	0.64	-0.58	0.998	C\C=C/CCCO
1-Hexen-3-ol	1	Accepted	100.09	0.052	0.023	1.367	-0.651	0.986	CCCC(O)C=C
Methyl (E)-3-hexenoate	0	Accepted	128.08	0.868	0.022	2.144	-1.909	0.988	CC\C=C/CC(=O)OC
4,4'-Diaminodibutylamine	0	Accepted	159.17	0.022	0.029	-0.682	0.878	0.181	NCCCCNCCCCN
1-Hydroxy-2-butanone	1	Accepted	88.05	0.034	0.245	-0.278	0.883	0.668	CCC(=O)CO
(R)-Acetoin	1	Accepted	88.05	0.032	0.03	-0.598	0.675	0.532	C[C@@H](O)C(C)=O
Ethyl (Â±)-3-hydroxyhexanoate	0	Accepted	160.11	0.147	0.021	1.409	-1.391	0.937	CCCC(O)CC(=O)OCC
R-2-Hydroxy-3-methylbutanoic acid 3-Methylbutanoyl	0	Accepted	202.12	0.026	0.005	2.443	-2.284	0.966	CC(C)CC(=O)OC(C(C)C)C(O)=O
Methyl 3-hydroxyisovalerate	0	Accepted	132.08	0.064	0.008	0.236	0.569	0.969	COC(=O)CC(C)(C)O
2-Hydroxy-3-methyl-2-cyclopenten-1-one	0	Accepted	112.05	0.215	0.628	0.519	-1.454	0.989	CC1=C(O)C(=O)CC1
Diacetone alcohol	1	Accepted	116.08	0.069	0.006	-0.149	0.678	0.797	CC(=O)CC(C)(C)O
Tiglic aldehyde	2	Accepted	84.06	0.332	0.957	1.061	-1.009	0.992	C\C=C(\C)C=O
5-Butyl-delta-valerolactone	0	Accepted	156.12	0.727	0.019	2.73	-2.474	0.954	CCCCC1CCCC(=O)O1
3-Hydroxy-2-pentanone	1	Accepted	102.07	0.023	0.046	-0.116	0.691	0.62	CCC(O)C(C)=O
3-Hydroxy-2-oxopropanoic acid	2	Accepted	104.01	0.012	0.044	-1.43	0.16	0.577	OCC(=O)C(O)=O.OC(C=O)C(O)=O
Maleic acid	1	Accepted	116.01	0.018	0.022	0.12	0.52	0.146	OC(=O)\C=C/C(O)=O
Malic acid	3	Accepted	134.02	0.013	0.02	-1.688	0.114	0.642	OC(CC(O)=O)C(O)=O
1,3-Propanedial	1	Accepted	72.02	0.035	0.993	-1.263	0.212	0.054	O=CCC=O
Propanedioic acid	0	Accepted	104.01	0.092	0.028	-0.679	0.548	0.223	OC(=O)CC(O)=O
Dimethyl malonate	0	Accepted	132.04	0.166	0.018	-0.037	-0.075	0.97	COC(=O)CC(=O)OC
4-Mercapto-4-methyl-2-pentanone	2	Accepted	132.06	0.634	0.006	1.01	-0.956	0.591	CC(=O)CC(C)(C)S
2-Mercaptopropanoic acid	1	Accepted	106.01	0.031	0.005	0.891	0.043	0.308	CC(S)C(O)=O
Ethyl 2-mercaptopropanoate	1	Accepted	134.04	0.195	0.026	1.406	-1.246	0.874	CCOC(=O)C(C)S
Mesoxalic acid	2	Accepted	117.99	0.009	0.032	-0.996	0.057	0.1	OC(=O)C(=O)C(O)=O
Methanol	0	Accepted	32.03	0.625	0.067	-0.577	1.046	0.801	CO
Methyl acetate	0	Accepted	74.04	0.082	0.04	0.113	0.691	0.99	COC(C)=O
2-Methylbutanal	1	Accepted	86.07	0.045	0.049	1.116	-0.531	0.98	CCC(C)C=O
(S)-2-Methyl-1-butanol	0	Accepted	88.09	0.189	0.01	1.152	-0.381	0.993	CCC(C)CO
Isopentyl alcohol	0	Accepted	88.09	0.135	0.009	1.235	-0.578	0.979	CC(C)CCO
Isopentyl acetate	0	Accepted	130.1	0.31	0.012	2.155	-1.651	0.989	CC(C)CCOC(C)=O
2-Methyl-2-butenal	2	Accepted	84.06	0.332	0.957	1.061	-1.009	0.992	C\C=C(\C)C=O
3-Methyl-2-butenal	2	Accepted	84.06	0.821	0.56	0.98	-0.736	0.998	CC(C)=CC=O
2-Methylbutanoic acid	0	Accepted	102.07	0.047	0.006	1.269	-0.35	0.971	CCC(C)C(O)=O
3-Methyl-2-butene-1-thiol	2	Accepted	102.05	0.464	0.737	2.68	-2.428	0.071	CC(C)=CCS
3-Methyl-3-buten-2-one	2	Accepted	84.06	0.402	0.056	0.739	-0.294	0.944	CC(=C)C(C)=O
(Â±)-Dihydro-5-pentyl-2(3H)-furanone	0	Accepted	156.12	0.733	0.03	2.822	-2.581	0.961	CCCCCC1CCC(=O)O1
1-Methyl-1,3-cyclohexadiene	0	Accepted	94.08	0.793	0.146	2.038	-2.007	0.922	CC1=CC=CCC1
2-Methylcyclohexanone	0	Accepted	112.09	0.537	0.098	1.192	-0.837	0.994	CC1CCCCC1=O
4-Methylcyclohexanone	0	Accepted	112.09	0.103	0.159	1.314	-0.969	0.997	CC1CCC(=O)CC1
3-Methyl-2-cyclohexen-1-one	1	Accepted	110.07	0.861	0.021	0.702	-0.462	0.991	CC1=CC(=O)CCC1
Methylcyclopentane	0	Accepted	84.09	0.277	0.025	3.358	-3.297	0.993	CC1CCCC1
3-Methyl-1,2-cyclopentanedione	0	Accepted	112.05	0.215	0.628	0.519	-1.454	0.989	CC1CCC(=O)C1=O
3-Methyl-2-cyclopenten-1-one	1	Accepted	96.06	0.862	0.029	0.427	0.054	0.988	CC1=CC(=O)CC1
Heptanenitrile	1	Accepted	111.1	0.834	0.012	2.282	-2.771	0.998	CCCCCCC#N
5-Methyl-2-hexanone	1	Accepted	114.1	0.072	0.007	1.773	-1.575	0.997	CC(C)CCC(C)=O
5-Methyl-3-hexen-2-one	2	Accepted	112.09	0.9	0.651	1.602	-1.277	0.976	CC(C)\C=C/C(C)=O
5-Methyl-5-hexen-2-one	1	Accepted	112.09	0.622	0.008	1.279	-0.912	0.995	CC(=C)CCC(C)=O
Dihydrocurcumin	3	Accepted	370.14	0.652	0.358	2.354	-3.567	0.045	COC1=CC(\C=C\C(=O)CC(=O)CCC2=CC(OC)=C(O)C=C2)=CC=C1O
(Â±)-4-Methyloctanoic acid	0	Accepted	158.13	0.194	0.005	3.118	-2.642	0.774	CCCCC(C)CCC(O)=O
4-Methyl-2,3-pentanedione	2	Accepted	114.07	0.033	0.347	0.72	-0.786	0.872	CC(C)C(=O)C(C)=O
3-Methyl-1-pentanol	0	Accepted	102.1	0.254	0.007	1.75	-1.169	0.981	CCC(C)CCO
4-Methyl-2-pentanone	1	Accepted	100.09	0.072	0.01	1.175	-1.071	0.995	CC(C)CC(C)=O
2-Methyl-2-pentenoic acid	0	Accepted	114.07	0.015	0.005	1.583	-0.679	0.983	CC\C=C(\C)C(O)=O
4-Methyl-2-pentenoic acid	0	Accepted	114.07	0.556	0.009	1.811	-1.221	0.655	CC(C)\C=C/C(O)=O
2-Methyl-3-pentenoic acid	0	Accepted	114.07	0.015	0.005	1.583	-0.679	0.983	C\C=C/C(C)C(O)=O
4-Methyl-3-penten-2-one, 9CI	2	Accepted	98.07	0.79	0.025	1.007	-0.616	0.984	CC(C)=CC(C)=O
4-Methyl-4-penten-2-one	2	Accepted	98.07	0.79	0.025	1.007	-0.616	0.984	CC(=C)CC(C)=O
Dihydrojasmone	1	Accepted	166.14	0.438	0.028	3.764	-3.927	0.699	CCCCCC1=C(C)CCC1=O
2-Methyl-3-phenyl-2-propenal	2	Accepted	146.07	0.572	0.746	2.36	-2.345	0.653	C\C(C=O)=C\C1=CC=CC=C1
3-Methyl-4-phenyl-3-buten-2-one	2	Accepted	160.09	0.54	0.511	2.565	-2.142	0.288	CC(=O)C(\C)=C/C1=CC=CC=C1
4-Methyl-1-phenyl-2-pentanol	0	Accepted	178.14	0.279	0.013	3.252	-3.237	0.888	CC(C)CC(O)CC1=CC=CC=C1
4-Methyl-1-phenyl-2-pentanone	1	Accepted	176.12	0.065	0.03	2.696	-2.706	0.919	CC(C)CC(=O)CC1=CC=CC=C1
2-Methyl-1-phenyl-2-propanol	0	Accepted	150.1	0.386	0.009	2.023	-1.698	0.948	CC(C)(O)CC1=CC=CC=C1
2-Methyl-1-phenyl-2-propanyl acetate	0	Accepted	192.12	0.504	0.009	2.858	-2.646	0.98	CC(=O)OC(C)(C)CC1=CC=CC=C1
(-)-cis-2-Methyl-4-propyl-1,3-oxathiane	0	Accepted	160.09	0.897	0.053	2.463	-2.295	0.709	CCCC1CCOC(C)S1
(+)-cis-2-Methyl-4-propyl-1,3-oxathiane	0	Accepted	160.09	0.897	0.053	2.463	-2.295	0.709	CCCC1CCOC(C)S1
4-Methyl-2-pyrroline	0	Accepted	83.07	0.86	0.29	1.631	-1.484	0.904	CC1CNC=C1
Sulforaphene	5	Accepted	175.01	0.768	0.381	1.062	-1.072	0.478	CS(=O)\C=C\CCN=C=S
(R)-(E)-Sulforaphene	5	Accepted	175.01	0.768	0.381	1.062	-1.072	0.478	CS(=O)\C=C\CCN=C=S
(R)-1-Isothiocyanato-3-(methylsulfinyl)propane	5	Accepted	163.01	0.854	0.807	0.347	0.414	0.327	CS(=O)CCCN=C=S
Ethyl heptanoate	0	Accepted	158.13	0.243	0.008	3.253	-2.959	0.961	CCCCCCC(=O)OCC
2-Methylpentanal	1	Accepted	100.09	0.044	0.029	1.678	-1.174	0.984	CCCC(C)C=O
2-Methylpentanoic acid	0	Accepted	116.08	0.052	0.005	1.823	-1.059	0.974	CCCC(C)C(O)=O
Ethyl (Â±)-2-methylpentanoate	0	Accepted	144.12	0.087	0.008	2.666	-2.205	0.993	CCCC(C)C(=O)OCC
4-Methylpentanoic acid	0	Accepted	116.08	0.144	0.008	1.809	-1.123	0.836	CC(C)CCC(O)=O
Morpholine	0	Accepted	87.07	0.125	0.07	-0.556	1.061	0.875	C1COCCN1
6-Methyl-3,5-heptadien-2-one	3	Accepted	124.09	0.628	0.433	1.866	-1.72	0.898	CC(C)=C\C=C/C(C)=O
Patuletin 3-(2''-apiosyl-[2'''-feruloylgentiobioside])	4	Rejected	964.25	0.061	0.728	0.205	-2.71	0.083	COC1=C(O)C=CC(\C=C\C(=O)O[C@H]2[C@H](OC[C@H]3O[C@@H](OC4=C(OC5=C(C(O)=C(OC)C(O)=C5)C4=O)C4=CC=C(O)C(O)=C4)[C@H](O[C@@H]4OC[C@](O)(CO)[C@H]4O)[C@@H](O)[C@@H]3O)O[C@H](CO)[C@@H](O)[C@@H]2O)=C1
2-Methylheptanoic acid	0	Accepted	144.12	0.074	0.005	2.764	-2.093	0.976	CCCCCC(C)C(O)=O
6-Methylheptanoic acid	0	Accepted	144.12	0.148	0.006	2.736	-2.236	0.886	CC(C)CCCCC(O)=O
4-Methyl-2-heptanol	0	Accepted	130.14	0.129	0.008	2.632	-1.845	0.947	CCCC(C)CC(C)O
(R)-Sulcatol	0	Accepted	128.12	0.291	0.008	2.479	-1.671	0.949	CC(O)CCC=C(C)C
5-Methyl-5-hepten-2-one	1	Accepted	126.1	0.08	0.006	1.098	-1.44	0.994	C\C=C(\C)CCC(C)=O
Brevifolincarboxylic acid 9-sulfate	1	Rejected	371.98	0.136	0.007	-0.645	-3.88	0.002	OC(=O)C1CC(=O)C2=C1C1=C(OS(O)(=O)=O)C(O)=C(O)C=C1C(=O)O2
5-Methyl-2,3-hexanedione	2	Accepted	128.08	0.062	0.52	1.262	-1.462	0.993	CC(C)CC(=O)C(C)=O
2-Methylhexanoic acid	0	Accepted	130.1	0.064	0.005	2.335	-1.605	0.978	CCCCC(C)C(O)=O
5-Methylhexanoic acid	0	Accepted	130.1	0.126	0.006	2.323	-1.778	0.869	CC(C)CCCC(O)=O
Methyl 5-methylhexanoate	0	Accepted	144.12	0.217	0.009	2.71	-2.552	0.993	COC(=O)CCCC(C)C
2,4-Pentadienal	4	Accepted	82.04	0.718	0.872	1.058	-0.683	0.927	C=C\C=C/C=O
2,3-Pentanedione	2	Accepted	100.05	0.043	0.699	0.505	-0.179	0.985	CCC(=O)C(C)=O
1-Pentanol	0	Accepted	88.09	0.311	0.009	1.379	-0.75	0.99	CCCCCO
2-Pentenal	2	Accepted	84.06	0.779	0.784	1.086	-0.834	0.992	CC\C=C/C=O
(E)-2-Pentenal	2	Accepted	84.06	0.779	0.784	1.086	-0.834	0.992	CC\C=C/C=O
4-Pentenoic acid	1	Accepted	100.05	0.096	0.02	0.841	-0.287	0.57	OC(=O)CCC=C
Ethyl 4-pentenoate	1	Accepted	128.08	0.289	0.051	1.966	-1.785	0.997	CCOC(=O)CCC=C
2-Penten-1-ol	0	Accepted	86.07	0.679	0.172	0.596	-0.738	0.997	CC\C=C/CO
(E)-2-Penten-1-ol	0	Accepted	86.07	0.679	0.172	0.596	-0.738	0.997	CC\C=C/CO
1-Penten-3-ol	1	Accepted	86.07	0.051	0.032	0.78	0.234	0.976	CCC(O)C=C
3-Penten-2-one	2	Accepted	84.06	0.894	0.827	0.663	-0.287	0.99	C\C=C/C(C)=O
4-Penten-2-one	2	Accepted	84.06	0.894	0.827	0.663	-0.287	0.99	CC(=O)CC=C
1-Penten-3-one	3	Accepted	84.06	0.905	0.849	0.808	-0.541	0.993	CCC(=O)C=C
Phenoxyacetic acid	0	Accepted	152.05	0.216	0.018	1.275	-1.282	0.481	OC(=O)COC1=CC=CC=C1
Allyl phenoxyacetate	1	Accepted	192.08	0.304	0.154	2.369	-2.557	0.925	C=CCOC(=O)COC1=CC=CC=C1
(Â±)-4-Phenyl-2-butanol	0	Accepted	150.1	0.308	0.029	2.157	-1.735	0.885	CC(O)CCC1=CC=CC=C1
4-Phenyl-3-buten-2-ol	0	Accepted	148.09	0.474	0.129	2.105	-1.486	0.946	CC(O)\C=C/C1=CC=CC=C1
Benzylideneacetone	2	Accepted	146.07	0.67	0.657	1.86	-2.533	0.817	CC(=O)\C=C\C1=CC=CC=C1
Ethyl 4-phenylbutanoate	0	Accepted	192.12	0.294	0.013	3.05	-3.18	0.672	CCOC(=O)CCCC1=CC=CC=C1
2-Phenyl-2-butenal	2	Accepted	146.07	0.052	0.052	2.543	-2.776	0.668	C\C=C(\C=O)C1=CC=CC=C1
Vestitone	1	Accepted	286.08	0.294	0.659	2.695	-3.794	0.062	COC1=CC(O)=C(C=C1)C1COC2=C(C=CC(O)=C2)C1=O
Ethyl phenylglycidate	1	Accepted	192.08	0.343	0.51	2.045	-2.449	0.968	CCOC(=O)C1OC1C1=CC=CC=C1
5-Phenyl-1-pentanol	0	Accepted	164.12	0.209	0.01	2.695	-2.428	0.984	OCCCCCC1=CC=CC=C1
1-Phenyl-2-pentanol	0	Accepted	164.12	0.234	0.021	2.842	-2.507	0.847	CCCC(O)CC1=CC=CC=C1
2-Phenylpropanal	1	Accepted	134.07	0.099	0.209	1.609	-1.435	0.945	CC(C=O)C1=CC=CC=C1
1-Phenyl-1-propanol	0	Accepted	136.09	0.057	0.025	1.961	-1.446	0.816	CCC(O)C1=CC=CC=C1
(Â±)-2-Phenyl-1-propanol	0	Accepted	136.09	0.344	0.057	1.755	-1.264	0.983	CC(CO)C1=CC=CC=C1
3-Phenylpropanoic acid	0	Accepted	150.07	0.137	0.011	1.786	-1.58	0.356	OC(=O)CCC1=CC=CC=C1
2-Oxo-3-phenylpropanoic acid (Mixture oxo and keto)	2	Accepted	164.05	0.031	0.021	1.146	-1.304	0.347	OC(=O)C(=O)CC1=CC=CC=C1
Propylene glycol	0	Accepted	76.05	0.041	0.026	-0.869	0.858	0.238	CC(O)CO
1,2-Propanedithiol	1	Accepted	108.01	0.809	0.046	1.711	-1.576	0.022	CC(S)CS
1,3-Propanedithiol	1	Accepted	108.01	0.809	0.398	1.444	-1.776	0.011	SCCCS
Bisnoryangonin	1	Accepted	230.06	0.71	0.016	2.441	-2.161	0.028	OC1=CC=C(\C=C\C2=CC(O)=CC(=O)O2)C=C1
2-Propanethiol	1	Accepted	76.03	0.563	0.015	1.717	-1.26	0.828	CC(C)S
2-Propanol	0	Accepted	60.06	0.118	0.031	-0.031	0.989	0.89	CC(C)O
2-Propene-1-thiol	3	Accepted	74.02	0.533	0.628	1.561	-1.413	0.356	SCC=C
(E)-1-Propene-1-sulfenic acid	0	Accepted	90.01	0.323	0.151	1.243	-0.557	0.958	C\C=C\SO
Potassium propionate	0	Accepted	73.03	0.185	0.021	-1.531	0.784	0.977	[K+].CCC([O-])=O
Pentyl propanoate	0	Accepted	144.12	0.216	0.006	2.874	-2.523	0.964	CCCCCOC(=O)CC
N-Nitroso-pyrrolidine	1	Accepted	100.06	0.989	0.994	-0.034	0.456	0.872	O=NN1CCCC1
3,4-Dihydro-2H-pyrrole	0	Accepted	69.06	0.854	0.09	1.305	-0.5	0.969	C1CC=NC1
Pyruvic acid	2	Accepted	88.02	0.022	0.036	-0.496	0.575	0.325	CC(=O)C(O)=O.OC(=C)C(O)=O
Ethyl pyruvate	2	Accepted	116.05	0.034	0.139	0.433	0.014	0.88	CCOC(=O)C(O)=C
1,1-Diethoxyethane	1	Accepted	118.1	0.237	0.017	1.028	-0.945	0.87	CCOC(C)OCC
Acetaldehyde	1	Accepted	44.03	0.052	0.066	-0.466	1.064	0.951	CC=O
Acetamide	0	Accepted	59.04	0.057	0.072	-1.175	0.602	0.998	CC(N)=O
Acetone	1	Accepted	58.04	0.362	0.007	-0.264	1.035	0.978	CC(C)=O
Acrylic acid	2	Accepted	72.02	0.176	0.046	0.186	0.656	0.755	OC(=O)C=C
2,4-Pentanedione	1	Accepted	100.05	0.033	0.017	-0.488	0.14	0.744	CC(=O)CC(C)=O
Aconitic acid	1	Accepted	174.02	0.019	0.034	-0.296	-0.291	0.037	OC(=O)C\C(=C\C(O)=O)C(O)=O
(E)-Aconitic acid	1	Accepted	174.02	0.019	0.034	-0.296	-0.291	0.037	OC(=O)C\C(=C/C(O)=O)C(O)=O
(Z)-Aconitic acid	1	Accepted	174.02	0.019	0.034	-0.296	-0.291	0.037	OC(=O)C\C(=C\C(O)=O)C(O)=O
2-Propenal	3	Accepted	56.03	0.85	0.962	0.235	0.754	0.98	C=CC=O
Acrylamide	3	Accepted	71.04	0.81	0.118	-0.515	0.855	0.998	NC(=O)C=C
Hexanedioic acid	0	Accepted	146.06	0.071	0.014	0.22	-0.051	0.125	OC(=O)CCCCC(O)=O
Agmatine	1	Accepted	130.12	0.126	0.702	-2.247	-0.977	0.219	NCCCCNC(N)=N
Allyl alcohol	1	Accepted	58.04	0.055	0.071	0.133	0.965	0.994	OCC=C
3-(Methylthio)-1-propene	2	Accepted	88.03	0.76	0.027	1.961	-2.229	0.993	CSCC=C
3-Aminobutanoic acid	0	Accepted	103.06	0.211	0.023	-2.67	0.682	0.515	CC(N)CC(O)=O
Jaceidin 4'-glucuronide	1	Rejected	536.12	0.026	0.342	1.049	-4.186	0.053	COC1=CC(=CC=C1O[C@@H]1O[C@@H]([C@@H](O)[C@H](O)[C@H]1O)C(O)=O)C1=C(OC)C(=O)C2=C(O1)C=C(O)C(OC)=C2O
Ferreirin	1	Accepted	302.08	0.129	0.554	2.592	-3.731	0.029	COC1=CC(O)=C(C=C1)C1COC2=CC(O)=CC(O)=C2C1=O
3-Methyl-1-butylamine	0	Accepted	87.1	0.087	0.033	1.318	0.239	0.851	CC(C)CCN
Dibutyl sulfide	0	Accepted	146.11	0.484	0.005	3.921	-3.565	0.815	CCCCSCCCC
3-Isovalidene-3alpha,4-dihydrophthalide	1	Accepted	204.12	0.903	0.761	3.825	-4.227	0.946	CC(C)C\C=C1/OC(=O)C2=CC=CCC12
Pantothenic acid	2	Accepted	219.11	0.047	0.107	-2.297	-0.594	0.4	CC(C)(CO)C(O)C(=O)NCCC(O)=O
3-(3-Methylbutylidene)-1(3H)-isobenzofuranone	0	Accepted	202.1	0.463	0.938	3.857	-4.373	0.153	CC(C)C\C=C1/OC(=O)C2=CC=CC=C12
Daucic acid	1	Accepted	204.03	0.907	0.225	-1.588	-0.504	0.258	OC1C=C(OC(C1O)C(O)=O)C(O)=O
Diethyl sulfide	0	Accepted	90.05	0.799	0.023	2.017	-1.534	0.968	CCSCC
Armillaribin	3	Accepted	398.21	0.494	0.035	5.183	-5.4	0.044	COC1=CC(O)=C(C(=O)OC2CC3(C)C4CC(C)(C)CC4CC(C=O)=C23)C(C)=C1
Armillarilin	3	Accepted	430.2	0.128	0.389	3.484	-4.68	0.731	COC1=CC(O)=C(C(=O)OC2CC3(C)C4CC(C)(C)CC4(O)C=C(C=O)C23O)C(C)=C1
Armillarinin	3	Accepted	464.16	0.259	0.252	4.021	-4.824	0.607	COC1=C(Cl)C(C)=C(C(=O)OC2CC3(C)C4CC(C)(C)CC4(O)C=C(C=O)C23O)C(O)=C1
3beta-Acetoxy-11alpha-methoxy-12-ursen-28-oic acid	0	Rejected	542.4	0.016	0.025	6.349	-6.496	0.401	COC1C=C2C3C(C)C(C)CCC3(CCC2(C)C2(C)CCC3C(C)(C)C(CCC3(C)C12)OC(C)=O)C(=O)OC
Corchoionoside A	1	Accepted	388.21	0.447	0.438	-0.2	-1.441	0.081	CC(O)\C=C\C12OC1(C)CC(CC2(C)C)OC1OC(CO)C(O)C(O)C1O
5-(14-Nonadecenyl)-1,3-benzenediol	1	Accepted	374.32	0.017	0.006	8.865	-3.16	0.019	CCCC\C=C\CCCCCCCCCCCCCC1=CC(O)=CC(O)=C1
Pipericine	1	Accepted	335.32	0.089	0.013	7.442	-4.889	0.234	CCCCCCCCCCCCC\C=C/C=C/C(=O)NCC(C)C
1-O-beta-D-Glucopyranosyl-2,3-di-O-palmitoylglycerol	0	Rejected	730.56	0.061	0.106	10.052	-3.159	0.005	CCCCCCCCCCCCCCCC(=O)OCC(COC1OC(CO)C(O)C(O)C1O)OC(=O)CCCCCCCCCCCCCCC
4-Propyl-gamma-butyrolactone	0	Accepted	128.08	0.854	0.04	1.757	-1.871	0.985	CCCC1CCC(=O)O1
(Â±)-Dihydro-5-octyl-2(3H)-furanone	0	Accepted	198.16	0.415	0.017	4.04	-4.126	0.764	CCCCCCCCC1CCC(=O)O1
2-Methyloctanal	1	Accepted	142.14	0.08	0.018	3.158	-2.455	0.995	CCCCCCC(C)C=O
2,4-Heptadienal	2	Accepted	110.07	0.698	0.969	0.912	-0.46	0.974	CC\C=C/C=C/C=O
(E,E)-2,4-Octadienal	2	Accepted	124.09	0.727	0.911	1.582	-1.305	0.981	CCC\C=C\C=C\C=O
1,2-Di-O-myristoyl-3-O-(6-sulfoquinovopyranosyl)glycerol	1	Rejected	738.46	0.156	0.04	6.398	-2.748	0.018	CCCCCCCCCCCCCC(=O)OCC(COC1OC(CS(O)(=O)=O)C(O)C(O)C1O)OC(=O)CCCCCCCCCCCCC
Hexyl glucoside	0	Accepted	264.16	0.042	0.306	0.069	-0.837	0.346	CCCCCCOC1OC(CO)C(O)C(O)C1O
1-Hexanol arabinosylglucoside	0	Accepted	396.2	0.046	0.322	-0.95	-0.782	0.319	CCCCCCOC1OC(COC2OC(CO)C(O)C2O)C(O)C(O)C1O
cis-3-Hexenyl pentanoate	0	Accepted	184.15	0.638	0.052	2.988	-3.526	0.987	CCCCC(=O)OCC\C=C/CC
cis-3-Hexenyl trans-4-hexenoate	0	Accepted	196.15	0.534	0.011	2.789	-3.605	0.86	CC\C=C/CCOC(=O)CC\C=C\C
S-(3-Methyl-2-butenyl) ethanethioate	2	Accepted	144.06	0.533	0.063	2.361	-2.537	0.991	CC(C)=CCSC(C)=O
1-(Malonylamino)cyclopropanecarboxylic acid	1	Accepted	187.05	0.044	0.102	-0.874	-0.361	0.316	OC(=O)CC(=O)NC1(CC1)C(O)=O
1-(gamma-Glutamylamino)cyclopropanecarboxylic acid	1	Accepted	230.09	0.033	0.066	-3.394	-1.147	0.586	NC(CCC(=O)NC1(CC1)C(O)=O)C(O)=O
1-Piperidinecarboxaldehyde	1	Accepted	113.08	0.113	0.02	0.392	0.75	0.834	O=CN1CCCCC1
2-Ethylbutyl acetate	0	Accepted	144.12	0.381	0.013	2.774	-1.968	0.993	CCC(CC)COC(C)=O
Danielone	1	Accepted	212.07	0.034	0.105	0.456	-1.769	0.891	COC1=CC(=CC(OC)=C1O)C(=O)CO
Heliannone A	2	Accepted	300.1	0.738	0.693	2.952	-3.689	0.115	COC1=C(OC)C(O)=C(C=C1)C(=O)\C=C\C1=CC=C(O)C=C1
1,2-Ethanedithiol	1	Accepted	93.99	0.85	0.705	1.161	-1.643	0.014	SCCS
1,6-Hexanedithiol	1	Accepted	150.05	0.619	0.292	2.71	-2.733	0.004	SCCCCCCS
1,9-Nonanedithiol	1	Accepted	192.1	0.387	0.155	4.199	-4.277	0.002	SCCCCCCCCCS
(Â±)-Glycerol 1,2-diacetate	0	Accepted	176.07	0.628	0.335	-0.595	0.272	0.683	CC(=O)OCC(CO)OC(C)=O
6-Hydroxydaidzein	2	Accepted	270.05	0.403	0.18	2.328	-3.497	0.031	OC1=CC=C(C=C1)C1=COC2=C(C=C(O)C(O)=C2)C1=O
3-(Methylthio)-1-propanol	0	Accepted	106.05	0.762	0.011	0.658	-0.662	0.974	CSCCCO
3-(Methylthio)propyl acetate	0	Accepted	148.06	0.784	0.021	1.377	-1.8	0.98	CSCCCOC(C)=O
(Methylthio)acetaldehyde	1	Accepted	90.01	0.12	0.125	0.291	-0.246	0.912	CSCC=O
2'-Hydroxyformononetin	1	Accepted	284.07	0.312	0.084	3.236	-3.535	0.031	COC1=CC(O)=C(C=C1)C1=COC2=C(C=CC(O)=C2)C1=O
4-Hexyl-gamma-butyrolactone	0	Accepted	170.13	0.619	0.025	3.25	-3.037	0.931	CCCCCCC1CCC(=O)O1
3-Methyl-1-phenyl-3-pentanol	0	Accepted	178.14	0.232	0.008	2.951	-2.486	0.523	CCC(C)(O)CCC1=CC=CC=C1
3-Nonanol	0	Accepted	144.15	0.065	0.008	3.31	-2.401	0.948	CCCCCCC(O)CC
4-(4-Methyl-3-pentenyl)-3-cyclohexene-1-carboxaldehyde	1	Accepted	192.15	0.89	0.007	3.921	-3.273	0.968	CC(C)=CCCC1=CCC(CC1)C=O
2-Methylundecanal	1	Accepted	184.18	0.077	0.013	4.473	-3.781	0.994	CCCCCCCCCC(C)C=O
Ethyl maltol	0	Accepted	140.05	0.607	0.097	0.638	-1.111	0.221	CCC1=C(O)C(=O)C=CO1
2-Hexyl-3-phenyl-2-propenal	2	Accepted	216.15	0.23	0.065	4.574	-5.113	0.957	CCCCCC\C(C=O)=C/C1=CC=CC=C1
delta-Methylionone	2	Accepted	206.17	0.382	0.005	4.183	-3.973	0.047	CC(=O)C(\C)=C\C1=C(C)CCCC1(C)C
3-Methyl-4-(2,6,6-trimethyl-2-cyclohexen-1-yl)-3-buten-2-one	2	Accepted	206.17	0.382	0.005	4.183	-3.973	0.047	CC(=O)C(\C)=C\C1C(C)=CCCC1(C)C
7-Hydroxy-3,7-dimethyloctanal	1	Accepted	172.15	0.048	0.017	1.292	-1.242	0.968	CC(CCCC(C)(C)O)CC=O
Methyl dihydrojasmonate	0	Accepted	226.16	0.41	0.043	2.764	-2.791	0.973	CCCCC[C@@H]1[C@@H](CC(=O)OC)CCC1=O
(Â±)-2',4',5,7-Tetrahydroxy-3',8-diprenylisoflavanone	1	Accepted	424.19	0.069	0.077	6.264	-3.145	0.002	CC(C)=CCC1=C(O)C=CC(C2COC3=C(CC=C(C)C)C(O)=CC(O)=C3C2=O)=C1O
Vescalin	3	Rejected	632.06	0.004	0.078	-0.374	-2.665	0.001	OCC1OC(=O)C2=C(C(O)=C(O)C(O)=C2)C2=C(O)C(O)=C(O)C3=C2C(=O)OC(C2OC(=O)C4=C(C2O)C(O)=C(O)C(O)=C34)C1O
Thiamine hydrochloride	1	Accepted	265.11	0.772	0.008	-1.681	-1.172	0.831	Cl.[Cl-].CC1=C(CCO)SC=[N+]1CC1=C(N)N=C(C)N=C1
Sodium cyclamate	0	Accepted	179.06	0.03	0.008	-0.679	-0.096	0.196	[Na+].OS(=O)(=O)NC1CCCCC1
(S,E)-Zearalenone	1	Accepted	318.15	0.061	0.03	3.156	-3.236	0.108	[H]\C1=C([H])/C2=CC(O)=CC(O)=C2C(=O)OC(C)CCCC(=O)CCC1
Thiamine	1	Accepted	265.11	0.772	0.008	-1.681	-1.172	0.831	CC1=C(CCO)SC=[N+]1CC1=CN=C(C)N=C1N
Thiamine mononitrate	1	Accepted	265.11	0.772	0.008	-1.681	-1.172	0.831	[O-]N(=O)=O.CC1=C(CCO)SC=[N+]1CC1=C(N)N=C(C)N=C1
Notoginsenoside J	0	Rejected	834.5	0.003	0.058	-0.584	-2.094	0.16	CC(C)(O)C(O)CCC(C)(OC1OC(CO)C(O)C(O)C1O)C1CCC2(C)C1C(O)CC1C3(C)CCC(O)C(C)(C)C3C(CC21C)OC1OC(CO)C(O)C(O)C1O
Allithiamine	5	Accepted	354.12	0.87	0.015	0.387	-2.557	0.982	C\C(N(CC1=C(N)N=C(C)N=C1)C=O)=C(\CCO)SSCC=C
Dexpanthenol	2	Accepted	205.13	0.052	0.189	-1.059	0.138	0.193	CC(C)(CO)[C@@H](O)C(=O)NCCCO
Astringin	2	Accepted	406.13	0.306	0.534	0.51	-2.038	0.427	OCC1OC(OC2=CC(\C=C/C3=CC=C(O)C(O)=C3)=CC(O)=C2)C(O)C(O)C1O
Propyl benzoate	0	Accepted	164.08	0.076	0.008	3.088	-2.992	0.271	CCCOC(=O)C1=CC=CC=C1
Carbadox	5	Accepted	262.07	0.935	0.973	0.029	-3.799	0.104	COC(=O)N\N=C\C1=N(=O)C2=C(C=CC=C2)N(=O)=C1
Methyl 7-epi-12-hydroxyjasmonate glucoside	0	Accepted	402.19	0.184	0.026	-0.968	-1.124	0.653	COC(=O)CC1CCC(=O)C1C\C=C\CCOC1OC(CO)C(O)C(O)C1O
Docusate sodium	1	Accepted	422.23	0.205	0.006	4.334	-3.307	0.291	[Na+].CCCCC(CC)COC(=O)CC(C(=O)OCC(CC)CCCC)S(O)(=O)=O
Phytocassane E	1	Accepted	316.2	0.192	0.053	2.693	-3.938	0.814	CC1C2CCC3C(C)(C)C(=O)CC(O)C3(C)C2C(=O)C=C1C=C
Lucyoside J	1	Rejected	810.44	0.033	0.124	0.436	-2.776	0.092	CC1(C)CC2C3=CCC4C5(C)CCC(OC6OC(CO)C(O)C(O)C6O)C(C)(C=O)C5CCC4(C)C3(C)CCC2(CC1O)C(=O)OC1OC(CO)C(O)C(O)C1O
AzI	0	Rejected	938.49	0.179	0.183	1.816	-2.919	0.075	CC1=C(O)C(=O)CC(OC2CC(C)(C)CC3C4=CCC5C6(C)CCC(OC7OC(CO)C(O)C(O)C7OC7OC(CO)C(O)C(O)C7O)C(C)(CO)C6CCC5(C)C4(C)CCC23C(O)=O)O1
Asiminocin	1	Rejected	622.48	0.019	0.066	8.424	-4.648	0.007	CCCCC(O)CCCCCC(O)C1CCC(O1)C1CCC(O1)C(O)CCCCCCCCCCCCC1=CC(C)OC1=O
Hydroxytriphenylstannane	0	Accepted	351.02	0.022	0.019	4.672	-4.727	0.762	O[Sn](C1=CC=CC=C1)(C1=CC=CC=C1)C1=CC=CC=C1
Fenvalerate	1	Accepted	419.13	0.049	0.696	6.091	-7.152	0.095	CC(C)C(C(=O)OC(C#N)C1=CC(OC2=CC=CC=C2)=CC=C1)C1=CC=C(Cl)C=C1
Malonoben	2	Accepted	282.17	0.413	0.011	4.566	-5.424	0.619	CC(C)(C)C1=CC(C=C(C#N)C#N)=CC(=C1O)C(C)(C)C
Isorhapontigenin	1	Accepted	258.09	0.218	0.082	2.89	-2.55	0.033	COC1=CC(\C=C/C2=CC(O)=CC(O)=C2)=CC=C1O
m-Hydroxydiphenyldimercury(1+)	0	Accepted	279.01	0.563	0.195	2.459	-2.386	0.982	[OH+]([Hg]C1=CC=CC=C1)[Hg]C1=CC=CC=C1
Clenbuterol	1	Accepted	276.08	0.03	0.034	2.924	-2.966	0.895	CC(C)(C)NCC(O)C1=CC(Cl)=C(N)C(Cl)=C1
3-Hydroxyflavone	0	Accepted	238.06	0.43	0.494	3.566	-3.781	0.084	OC1=C(OC2=CC=CC=C2C1=O)C1=CC=CC=C1
Cuminyl alcohol	0	Accepted	150.1	0.146	0.019	2.41	-2.129	0.977	CC(C)C1=CC=C(CO)C=C1
D-Glyceric acid	2	Accepted	106.03	0.032	0.517	-1.486	0.083	0.582	OCC(O)C(O)=O
Neoisotussilagine	0	Accepted	199.12	0.044	0.012	0.32	-0.257	0.378	COC(=O)C1C2CCCN2CC1(C)O
Tussilagine	0	Accepted	199.12	0.044	0.012	0.32	-0.257	0.378	COC(=O)C1C2CCCN2CC1(C)O
Isotussilagine	0	Accepted	199.12	0.044	0.012	0.32	-0.257	0.378	COC(=O)C1C2CCCN2CC1(C)O
1,2-Diphenylcyclobutane	0	Accepted	208.13	0.709	0.463	4.706	-5.577	0.55	C1CC(C1C1=CC=CC=C1)C1=CC=CC=C1
Diphenyl disulfide	1	Accepted	218.02	0.422	0.905	4.525	-5.23	0.824	S(SC1=CC=CC=C1)C1=CC=CC=C1
4',5,8-Trihydroxyflavanone	2	Accepted	272.07	0.706	0.3	2.78	-4.047	0.042	OC1=CC=C(C=C1)C1CC(=O)C2=C(O)C=CC(O)=C2O1
Phenyl vinyl sulfide	1	Accepted	136.03	0.683	0.46	3.111	-3.041	0.673	C=CSC1=CC=CC=C1
Ginsenoside Rg5	0	Rejected	766.49	0.012	0.08	3.356	-3.523	0.052	CC(C)=CC\C=C(\C)C1CCC2(C)C1C(O)CC1C3(C)CCC(OC4OC(CO)C(O)C(O)C4OC4OC(CO)C(O)C(O)C4O)C(C)(C)C3CCC21C
(20E)-Ginsenoside F4	0	Rejected	766.49	0.009	0.068	3.279	-3.733	0.077	CC1OC(OC2C(O)C(O)C(CO)OC2OC2CC3(C)C(CC(O)C4C(CCC34C)C(\C)=C\CC=C(C)C)C3(C)CCC(O)C(C)(C)C23)C(O)C(O)C1O
Methyl methanethiosulfonate	0	Accepted	125.98	0.547	0.19	0.279	-0.898	0.993	CSS(C)(=O)=O
Benzyl beta-vicianoside	1	Accepted	312.11	0.004	0.103	-2.956	0.3	0.456	OC(COC1OCC(O)C(O)C1O)C(O)C(O)C(O)C=O.OC(COC1OCC(O)C(O)C1O)C1OC(O)C(O)C1O.OC1COC(OCC2OC(O)C(O)C(O)C2O)C(O)C1O
(Â±)-2,6-Dimethyl-5-heptenal	1	Accepted	140.12	0.228	0.017	2.793	-2.303	0.988	CC(CCC=C(C)C)C=O
Epismilagenin	0	Accepted	416.33	0.209	0.024	6.339	-6.35	0.117	[H][C@]12C[C@@]3([H])[C@]4([H])CC[C@]5([H])C[C@H](O)CC[C@]5(C)[C@@]4([H])CC[C@]3(C)[C@@]1([H])[C@H](C)[C@@]1(CC[C@@H](C)CO1)O2
Episarsasapogenin	0	Accepted	416.33	0.29	0.026	6.285	-6.166	0.121	[H][C@]12C[C@@]3([H])[C@]4([H])CC[C@]5([H])C[C@H](O)CC[C@]5(C)[C@@]4([H])CC[C@]3(C)[C@@]1([H])[C@H](C)[C@@]1(CC[C@H](C)CO1)O2
Asparagoside C	0	Rejected	740.43	0.028	0.107	2.02	-3.256	0.037	CC1C2C(CC3C4CCC5CC(CCC5(C)C4CCC23C)OC2OC(CO)C(O)C(OC3OC(CO)C(O)C(O)C3O)C2O)OC11CCC(C)CO1
Asparagoside D	1	Rejected	902.49	0.026	0.092	-0.273	-2.021	0.087	CC1C2C(CC3C4CCC5CC(CCC5(C)C4CCC23C)OC2OC(CO)C(OC3OC(CO)C(O)C(O)C3O)C(OC3OC(CO)C(O)C(O)C3O)C2O)OC11CCC(C)CO1
3-O-trans-Feruloyleuscaphic acid	2	Rejected	664.4	0.029	0.018	5.889	-4.063	0.573	COC1=C(O)C=CC(\C=C\C(=O)OC2C(O)CC3(C)C(CCC4(C)C3CC=C3C5C(C)(O)C(C)CCC5(CCC43C)C(O)=O)C2(C)C)=C1
Asparagoside E	0	Rejected	920.5	0.016	0.076	-0.947	-1.464	0.118	CC(CCC1(O)OC2CC3C4CCC5CC(CCC5(C)C4CCC3(C)C2C1C)OC1OC(CO)C(O)C(OC2OC(CO)C(O)C(O)C2O)C1O)COC1OC(CO)C(O)C(O)C1O
Ginsenoside F5	0	Rejected	770.48	0.007	0.072	2.518	-3.275	0.09	CC(C)=CCCC(C)(OC1OC(COC2OC(CO)C(O)C2O)C(O)C(O)C1O)C1CCC2(C)C1C(O)CC1C3(C)CCC(O)C(C)(C)C3C(O)CC21C
(S,E)-Lyratol acetate	1	Accepted	194.13	0.333	0.343	2.512	-2.3	0.658	CC(=O)OC\C(C)=C\C(C=C)C(C)=C
Nerylacetone	1	Accepted	194.17	0.326	0.002	3.094	-3.531	0.959	CC(C)=CCC\C(C)=C/CCC(C)=O
Rhapontigenin	1	Accepted	258.09	0.082	0.22	2.764	-2.662	0.018	COC1=C(O)C=C(\C=C/C2=CC(O)=CC(O)=C2)C=C1
Rhapontin	1	Accepted	420.14	0.54	0.715	0.838	-2.488	0.173	COC1=CC=C(\C=C/C2=CC(OC3OC(CO)C(O)C(O)C3O)=CC(O)=C2)C=C1O
2,3-Undecanedione	2	Accepted	184.15	0.23	0.14	3.219	-2.664	0.975	CCCCCCCCC(=O)C(C)=O
Trimethylpyrazine	0	Accepted	122.08	0.788	0.022	0.964	0.191	0.967	CC1=NC(C)=C(C)N=C1
3-Propylidene-1(3H)-isobenzofuranone	0	Accepted	174.07	0.163	0.006	3.03	-3.369	0.413	CC\C=C1\OC(=O)C2=CC=CC=C12
Geranylacetone	1	Accepted	194.17	0.326	0.002	3.094	-3.531	0.959	CC(C)=CCC\C(C)=C/CCC(C)=O
Butylated hydroxyanisole	1	Accepted	180.12	0.086	0.014	3.277	-2.945	0.508	COC1=CC(=C(O)C=C1)C(C)(C)C.COC1=C(C=C(O)C=C1)C(C)(C)C
2-Ethylpyrazine	0	Accepted	108.07	0.158	0.011	0.8	0.987	0.67	CCC1=CN=CC=N1
2-Ethoxy-3-methylpyrazine	0	Accepted	138.08	0.314	0.173	1.605	-0.002	0.769	CCOC1=C(C)N=CC=N1
3-(5,6,6-Trimethylbicyclo[2.2.1]hept-1-yl)cyclohexanol	0	Accepted	236.21	0.024	0.003	4.417	-5.606	0.874	CC1C2CC(CC2C2CCCC(O)C2)C1(C)C
2-Methoxy-3-methylpyrazine	0	Accepted	124.06	0.408	0.292	1.133	0.336	0.807	COC1=C(C)N=CC=N1
2-Thiophenemethanethiol	2	Accepted	129.99	0.208	0.696	2.128	-2.302	0.132	SCC1=CC=CS1
5-Methyl-2-phenyl-2-hexenal	2	Accepted	188.12	0.122	0.013	3.79	-4.497	0.73	CC(C)C\C=C(\C=O)C1=CC=CC=C1
(Â±)-2-Methyl-3-(4-methylphenyl)propanal	1	Accepted	162.1	0.337	0.158	2.597	-2.502	0.892	CC(CC1=CC=C(C)C=C1)C=O
3-(Methylthio)propanal	1	Accepted	104.03	0.207	0.547	0.447	-0.686	0.958	CSCCC=O
4-Methyl-5-vinylthiazole	2	Accepted	125.03	0.761	0.468	1.882	-1.797	0.972	CC1=C(SC=N1)C=C
Norfuraneol	1	Accepted	114.03	0.822	0.009	0.406	-0.272	0.052	CC1=C(O)C(=O)CO1
2-Methoxy-3-(2-methylpropyl)pyrazine	0	Accepted	166.11	0.301	0.087	2.229	-1.872	0.921	COC1=NC=CN=C1CC(C)C
2-Acetylpyrazine	0	Accepted	122.05	0.19	0.025	0.004	0.373	0.685	CC(=O)C1=CN=CC=N1
2-(2-Methylpropyl)thiazole	1	Accepted	141.06	0.289	0.013	2.589	-2.213	0.941	CC(C)CC1=NC=CS1
gamma-Glutamyl-S-methylcysteine sulfoxide	2	Accepted	280.07	0.191	0.039	-3.752	-1.256	0.239	CS(=O)CC(NC(=O)CCC(N)C(O)=O)C(O)=O
Methyleugenol	1	Accepted	178.1	0.798	0.044	2.54	-2.942	0.716	COC1=C(OC)C=C(CC=C)C=C1
4'-tert-Butyl-2',6'-dimethyl-3',5'-dinitroacetophenone	2	Accepted	294.12	0.849	0.182	4.044	-4.444	0.882	CC(=O)C1=C(C)C(=C(C(=C1C)N(=O)=O)C(C)(C)C)N(=O)=O
2-Methyl-4-phenyl-2-butanol	0	Accepted	164.12	0.274	0.009	2.471	-2.146	0.809	CC(C)(O)CCC1=CC=CC=C1
4-Acetyl-6-tert-butyl-1,1-dimethylindane	0	Accepted	244.18	0.032	0.008	5.556	-5.593	0.169	CC(=O)C1=C2CCC(C)(C)C2=CC(=C1)C(C)(C)C
(S,E)-Lyratol propanoate	1	Accepted	208.15	0.261	0.065	3.155	-3.017	0.435	CCC(=O)OC\C(C)=C\C(C=C)C(C)=C
gamma-Glutamyl-S-(1-propenyl)cysteine sulfoxide	2	Accepted	306.09	0.224	0.035	-3.188	-1.201	0.069	C\C=C\S(=O)CC(NC(=O)CCC(N)C(O)=O)C(O)=O
Methyl propyl trisulfide	0	Accepted	153.99	0.323	0.588	2.109	-4.394	0.753	CCCSSSC
Methyl propyl disulfide	1	Accepted	122.02	0.516	0.2	2.359	-3.396	0.906	CCCSSC
N-gamma-Glutamyl-S-allylcysteine	2	Accepted	290.09	0.053	0.015	-2.625	-1.757	0.241	NC(CCC(=O)NC(CSCC=C)C(O)=O)C(O)=O
Methyl (methylthio)methyl disulfide	1	Accepted	139.98	0.104	0.166	2.012	-2.969	0.7	CSCSSC
Physalin E acetate	2	Rejected	586.21	0.959	0.09	1.502	-3.523	0.904	CC(=O)OC1CC2(O)CC=CC(=O)C2(C)C2CCC3(O)C(=O)OC4(C)C5CC6(C)C7C(=O)C(OC347)(OCC6C(=O)O5)C12
11a,12a-Epoxy-3b-hydroxy-28,13-oleananolide 3-acetate	1	Rejected	512.35	0.033	0.029	6.196	-6.288	0.402	CC(=O)OC1CCC2(C)C(CCC3(C)C2C2OC2C24OC(=O)C5(CCC(C)(C)CC25)CCC34C)C1(C)C
Ampeloside Bf2	0	Rejected	952.49	0.013	0.051	-2.301	-0.725	0.174	CC(CCC1(O)OC2CC3C4CC(O)C5CC(OC6OC(CO)C(OC7OC(CO)C(O)C(O)C7O)C(O)C6O)C(O)CC5(C)C4CCC3(C)C2C1C)COC1OC(CO)C(O)C(O)C1O
Ampeloside Bf1	1	Rejected	1114.54	0.011	0.038	-3.205	-0.19	0.209	CC(CCC1(O)OC2CC3C4CC(O)C5CC(OC6OC(CO)C(OC7OC(CO)C(O)C(OC8OC(CO)C(O)C(O)C8O)C7O)C(O)C6O)C(O)CC5(C)C4CCC3(C)C2C1C)COC1OC(CO)C(O)C(O)C1O
Sandosapogenol	1	Accepted	456.36	0.034	0.032	5.138	-4.51	0.998	CC1(C)CC(O)C2(C)CCC3(C)C(=CCC4C5(C)CCC(O)C(C)(C=O)C5CCC34C)C2C1
Sandosaponin B	2	Rejected	956.5	0.02	0.093	0.207	-2.35	0.128	CC1(C)CC(O)C2(C)CCC3(C)C(=CCC4C5(C)CCC(OC6OC(C(O)C(O)C6OC6OC(CO)C(O)C(O)C6OC6OC(CO)C(O)C(O)C6O)C(O)=O)C(C)(C=O)C5CCC34C)C2C1
Sandosaponin A	1	Rejected	956.5	0.026	0.084	0.274	-2.161	0.122	CC1(C)CC2C3=CCC4C5(C)CCC(OC6OC(C(O)C(O)C6OC6OC(CO)C(O)C(O)C6OC6OC(CO)C(O)C(O)C6O)C(O)=O)C(C)(CO)C5CCC4(C)C3(C)CCC2(C)C(=O)C1
6-Hydroxypentadecanedioic acid	0	Accepted	288.19	0.087	0.004	2.332	-2.866	0.028	OC(CCCCCCCCC(O)=O)CCCCC(O)=O
Rollidecin D	1	Rejected	606.49	0.025	0.033	9.463	-5.294	0.007	CCCCCCCCCCCCC(O)C1CCC(O1)C1CCC(CCCCCCCCCC(O)CC2=CC(C)OC2=O)O1
Rollidecin C	1	Rejected	578.45	0.03	0.034	8.664	-5.255	0.01	CCCCCCCCCCCCC(O)C1CCC(O1)C1CCC(CCCCCCCC(O)CC2=CC(C)OC2=O)O1
(1(10)E,4E,6a,8b)-8-Angeloyloxy-14-oxo-1(10),4,11(13)-germacratrien-12,6-olide	2	Accepted	344.16	0.35	0.091	2.021	-3.44	0.159	C\C=C(\C)C(=O)OC1C\C(C=O)=C/CC\C(C)=C\C2OC(=O)C(=C)C12
Capsianoside III	1	Rejected	1100.53	0.004	0.056	-2.795	-0.807	0.389	CC1OC(OCC2OC(OC3C(O)C(O)C(CO)OC3OC\C(C)=C\CC\C(C)=C/CC\C(C)=C\CCC(C)(OC3OC(CO)C(O)C(O)C3OC3OC(CO)C(O)C(O)C3O)C=C)C(O)C(O)C2O)C(O)C(O)C1O
Capsianoside II	1	Rejected	1084.53	0.006	0.063	-2.242	-1.264	0.329	CC1OC(OCC2OC(OC3C(O)C(C)OC(OC\C(C)=C\CC\C(C)=C/CC\C(C)=C\CCC(C)(OC4OC(CO)C(O)C(O)C4OC4OC(CO)C(O)C(O)C4O)C=C)C3O)C(O)C(O)C2O)C(O)C(O)C1O
Erinacine D	2	Accepted	478.29	0.814	0.569	2.784	-3.779	0.32	CCOC1CC2C3=C(CCC3(C)CCC2(C)C(OC2OCC(O)C(O)C2O)C=C1C=O)C(C)C
Phaseolic acid	2	Accepted	262.14	0.021	0.094	-1.052	-0.3	0.406	OCCCCC(O)CCC(O)CCC(=O)C(O)=O
Methyl (2E,4Z,6E,8E,10E)-4,8-dimethyl-12-oxo-2,4,6,8,10-dodecapentaenoate	3	Accepted	246.13	0.522	0.845	2.524	-3.056	0.97	COC(=O)\C=C\C(\C)=C\C=C\C(\C)=C\C=C\C=O
Blennin A	0	Accepted	250.16	0.096	0.069	3.086	-3.011	0.982	CC1C=C2C(COC2=O)C(O)C2CC(C)(C)CC12
Blennin D	0	Accepted	266.15	0.118	0.084	1.444	-2.82	0.992	CC1C=C2C(COC2=O)C(O)C2CC(C)(C)CC12O
5alpha-Tomatidan-3-one	0	Accepted	413.33	0.031	0.027	4.649	-4.3	0.956	CC1C2C(CC3C4CCC5CC(=O)CCC5(C)C4CCC23C)OC11CCC(C)CN1
Anhydrosafflor Yellow B	2	Rejected	1044.27	0.1	0.046	-1.217	-0.149	0.078	OCC(O)C(O)C(O)C1OC2=C(C1C1=C(O)C(O)(C3OC(CO)C(O)C(O)C3O)C(O)=C(C(=O)\C=C\C3=CC=C(O)C=C3)C1=O)C(=O)C(C(=O)\C=C\C1=CC=C(O)C=C1)=C(O)C2(O)C1OC(CO)C(O)C(O)C1O
Chaetoglobosin N	3	Accepted	542.28	0.076	0.151	4.294	-4.313	0.227	[H][C@]1(NC(=O)C23[C@@H](\C=C\C[C@H](C)\C=C(C)\C(=O)C(=O)CCC2=O)[C@@H]2O[C@]2(C)[C@@H](C)[C@@]13[H])[C@H](C)C1=CNC2=C1C=CC=C2
1-(2,4-Dihydroxyphenyl)-3-[8-hydroxy-2-methyl-2-(4-methyl-3-pentenyl)-2H-1-benzopyran-5-yl]-1-propanone	1	Accepted	408.19	0.765	0.057	5.779	-3.216	0.019	CC(C)=CCCC1(C)OC2=C(O)C=CC(CCC(=O)C3=C(O)C=C(O)C=C3)=C2C=C1
10,20-Dihydroxyeicosanoic acid	0	Accepted	344.29	0.076	0.004	4.993	-3.824	0.105	OCCCCCCCCCCC(O)CCCCCCCCC(O)=O
4-Nerolidylcatechol	3	Accepted	314.22	0.049	0.01	5.897	-4.336	0.024	CC(C)=CCC\C(C)=C\CCC(C)(C=C)C1=CC(O)=C(O)C=C1
Trilobalicin	1	Rejected	610.44	0.027	0.044	6.019	-4.786	0.009	CCCCCCCCCCC(O)C1CCC(O1)C(O)CCC(O)C1CCC(CCCCCC(O)CC2=CC(C)OC2=O)O1
Panaxytriol	4	Accepted	278.19	0.52	0.41	3.647	-3.365	0.387	CCCCCCCC(O)C(O)CC#CC#CC(O)C=C
Stigmast-22-ene-3,6-dione	0	Accepted	426.35	0.015	0.02	5.681	-6.145	0.981	CCC(\C=C\C(C)C1CCC2C3CC(=O)C4CC(=O)CCC4(C)C3CCC12C)C(C)C
14-Hydroxy-7-methylrosmanol	3	Accepted	376.19	0.049	0.058	3.971	-4.259	0.13	COC1C2OC(=O)C3(CCCC(C)(C)C23)C2=C1C(O)=C(C(C)C)C(O)=C2O
14-Methoxy-7-methylrosmanol	2	Accepted	390.2	0.041	0.047	4.341	-4.362	0.292	COC1C2OC(=O)C3(CCCC(C)(C)C23)C2=C1C(OC)=C(C(C)C)C(O)=C2O
(9S,10E,12Z,15Z)-9-Hydroxy-10,12,15-octadecatrienoic acid	1	Accepted	294.22	0.096	0.008	3.549	-3.716	0.017	CC\C=C\C\C=C\C=C\C(O)CCCCCCCC(O)=O
Squamocin F	1	Rejected	622.48	0.021	0.067	8.466	-4.667	0.007	CCCCCCCCCCC(O)C1CCC(O1)C1CCC(O1)C(O)CCC(O)CCCCCCCCCC1=CC(C)OC1=O
Arachisprenol 10	0	Rejected	698.64	0.001	0	12.462	-4.647	0.005	CC(C)=CCC\C(C)=C\CC\C(C)=C\CC\C(C)=C\CC\C(C)=C\CC\C(C)=C\CC\C(C)=C\CC\C(C)=C\CC\C(C)=C/CC\C(C)=C/CO
Arachisprenol 11	0	Rejected	766.7	0.001	0	13.561	-4.538	0.003	CC(C)=CCC\C(C)=C\CC\C(C)=C\CC\C(C)=C\CC\C(C)=C\CC\C(C)=C\CC\C(C)=C\CC\C(C)=C\CC\C(C)=C/CC\C(C)=C/CC\C(C)=C\CO
Arachisprenol 12	0	Rejected	834.76	0	0	14.692	-4.597	0.002	CC(C)=CCC\C(C)=C\CC\C(C)=C\CC\C(C)=C\CC\C(C)=C\CC\C(C)=C\CC\C(C)=C\CC\C(C)=C\CC\C(C)=C/CC\C(C)=C/CC\C(C)=C\CC\C(C)=C\CO
Niazinin A	4	Accepted	343.11	0.869	0.302	1.015	-1.967	0.55	COC(=S)NCC1=CC=C(OC2OC(C)C(O)C(O)C2O)C=C1.CO\C(S)=N/CC1=CC=C(OC2OC(C)C(O)C(O)C2O)C=C1
Niazinin B	4	Accepted	343.11	0.869	0.302	1.015	-1.967	0.55	COC(=S)NCC1=CC=C(OC2OC(C)C(O)C(O)C2O)C=C1
Niazimicin A	4	Accepted	357.12	0.632	0.38	1.43	-2.156	0.416	CCOC(=S)NCC1=CC=C(OC2OC(C)C(O)C(O)C2O)C=C1.CCO\C(S)=N/CC1=CC=C(OC2OC(C)C(O)C(O)C2O)C=C1
Niaziminin A	4	Accepted	399.14	0.663	0.332	1.945	-2.834	0.281	CCOC(=S)NCC1=CC=C(OC2OC(C)C(OC(C)=O)C(O)C2O)C=C1.CCO\C(S)=N/CC1=CC=C(OC2OC(C)C(OC(C)=O)C(O)C2O)C=C1
Niaziminin B	4	Accepted	399.14	0.663	0.332	1.945	-2.834	0.281	CCOC(=S)NCC1=CC=C(OC2OC(C)C(OC(C)=O)C(O)C2O)C=C1
N-[(4-hydroxyphenyl)methyl]ethoxycarbothioamide 4'-(tri-acetylrhamnoside)	6	Accepted	483.16	0.088	0.286	2.605	-4.175	0.081	CCO\C(S)=N\CC1=CC=C(O[C@@H]2O[C@@H](C)[C@H](OC(C)=O)[C@@H](OC(C)=O)[C@H]2OC(C)=O)C=C1
Niazicinin A	1	Accepted	369.14	0.374	0.268	0.612	-2.203	0.606	COC(=O)NCC1=CC=C(OC2OC(C)C(OC(C)=O)C(O)C2O)C=C1
1-Isobutanol	3	Accepted	453.16	0.106	0.365	1.523	-3.707	0.695	COC(=O)NCC1=CC=C(OC2OC(C)C(OC(C)=O)C(OC(C)=O)C2OC(C)=O)C=C1
Bis-N-butyl phthalate	3	Accepted	467.18	0.122	0.337	2.071	-3.911	0.502	CCOC(=O)NCC1=CC=C(OC2OC(C)C(OC(C)=O)C(OC(C)=O)C2OC(C)=O)C=C1
L-2-Aminoethyl seryl phosphate	0	Accepted	228.05	0.129	0.343	-4.094	-0.431	0.326	NCCOP(O)(=O)OCC(N)C(O)=O
28-Methyl-27-nonacosenoic acid	0	Accepted	450.44	0.028	0.002	12.04	-7.043	0.005	CC(C)=CCCCCCCCCCCCCCCCCCCCCCCCCCC(O)=O
3,5-Dihydroxyergosta-7,22-dien-6-one	0	Accepted	428.33	0.053	0.029	5.076	-5.653	0.855	CC(C)C(C)\C=C\C(C)C1CCC2C3=CC(=O)C4(O)CC(O)CCC4(C)C3CCC12C
3-Epicycloeucalenol	0	Accepted	426.39	0.041	0.058	6.752	-6.821	0.608	CC(C)C(=C)CCC(C)C1CCC2(C)C3CCC4C(C)C(O)CCC44CC34CCC12C
3-O-Acetylepisamarcandin	1	Accepted	442.24	0.035	0.011	4.082	-4.69	0.078	CC(=O)OC1CCC2(C)C(COC3=CC4=C(C=CC(=O)O4)C=C3)C(C)(O)CCC2C1(C)C
Lablaboside D	1	Rejected	1262.59	0.039	0.056	-0.616	-1.922	0.112	CC1OC(OC2C(O)C(O)C(CO)OC2OC2C(O)C(O)C(OC2OC2CCC3(C)C(CCC4(C)C3CC=C3C5CC(C)(C)CCC5(CCC43C)C(=O)OC3OC(COC(=O)CC(C)(O)CC(O)=O)C(O)C(O)C3O)C2(C)CO)C(O)=O)C(O)C(O)C1O
Lablaboside E	1	Rejected	1410.67	0.017	0.049	-1.52	-1.184	0.137	CC1OC(OC2C(C)OC(OC3C(O)C(O)C(CO)OC3OC(=O)C34CCC(C)(C)CC3C3=CCC5C6(C)CCC(OC7OC(C(O)C(O)C7OC7OC(CO)C(O)C(O)C7OC7OC(C)C(O)C(O)C7O)C(O)=O)C(C)(CO)C6CCC5(C)C3(C)CC4)C(O)C2O)C(O)C(O)C1O
Lablaboside F	1	Rejected	1394.67	0.015	0.055	-0.516	-1.861	0.087	CC1OC(OC2C(C)OC(OC3C(O)C(O)C(CO)OC3OC(=O)C34CCC(C)(C)CC3C3=CCC5C6(C)CCC(OC7OC(C(O)C(O)C7OC7OC(CO)C(O)C(O)C7OC7OC(C)C(O)C(O)C7O)C(O)=O)C(C)(C)C6CCC5(C)C3(C)CC4)C(O)C2O)C(O)C(O)C1O
Tsugaric acid B	0	Rejected	528.38	0.026	0.01	5.538	-4.732	0.738	CC(CCC(C1C(O)CC2(C)C3=C(CCC12C)C1(C)CCC(OC(C)=O)C(C)(C)C1CC3)C(O)=O)C(C)=C
(3b,6b,8a,12a)-8,12-Epoxy-7(11)-eremophilene-6,8,12-trimethoxy-3-ol	0	Accepted	326.21	0.053	0.098	1.634	-1.686	0.63	COC1OC2(CC3CCC(O)C(C)C3(C)C(OC)C2=C1C)OC
(3b,6b,8b,12a)-8,12-Epoxy-7(11)-eremophilene-6-angeloyloxy-8,12-dimethoxy-3-ol	1	Accepted	394.24	0.061	0.299	2.18	-2.631	0.293	COC1OC2(CC3CCC(O)C(C)C3(C)C(OC(=O)C(\C)=C\C)C2=C1C)OC
Melilotussaponin O1	2	Rejected	1074.56	0.013	0.064	0.033	-2.076	0.09	CC1OC(OC2C(OC3C(O)C(O)C(OC3OC3CCC4(C)C(CCC5(C)C4CC=C4C6CC(C)(C)CC(O)C6(C)CCC54C)C3(C)CO)C(O)=O)OC(CO)C(O)C2OC2OCC(O)C(O)C2O)C(O)C(O)C1O
Lansimide 2	0	Accepted	297.14	0.06	0.058	1.853	-2.452	0.966	CN1\C=C/C2=CC=CC=C2C(C(O)C1=O)C1=CC=CC=C1.CN1C(O)C(C(C(O)C1=O)C1=CC=CC=C1)C1=CC=CC=C1
Malvidin 3-glucoside-4-vinylphenol	1	Rejected	609.16	0.087	0.602	3.178	-3.752	0.007	COC1=CC(=CC(OC)=C1O)C1=[O+]C2=C3C(OC(=CC3=C1O[C@@H]1O[C@H](CO)[C@@H](O)[C@H](O)[C@H]1O)C1=CC=C(O)C=C1)=CC(O)=C2
1beta-Hydroxyalantolactone	1	Accepted	248.14	0.85	0.063	1.739	-2.852	0.91	CC1CCC(O)C2(C)CC3OC(=O)C(=C)C3C=C12
Heliespirone A	2	Accepted	264.14	0.803	0.041	1.5	-1.872	0.9	CC1=CC(=O)C2(CC1=O)OC(CC2C=C)C(C)(C)O
Methyl (9Z)-10'-oxo-6,10'-diapo-6-carotenoate	3	Accepted	312.17	0.879	0.701	2.186	-4.448	0.04	COC(=O)\C=C\C(\C)=C/C=C/C(/C)=C/C=C/C=C(\C)/C=C/C=O
Methyl (9Z)-6'-oxo-6,5'-diapo-6-carotenoate	3	Accepted	392.24	0.888	0.794	2.588	-4.925	0.002	COC(=O)\C=C\C(\C)=C/C=C/C(/C)=C/C=C/C=C(\C)/C=C/C=C(\C)/C=C/C(C)=O
Methyl (9Z)-6'-oxo-6,6'-diapo-6-carotenoate	3	Accepted	378.22	0.871	0.64	2.584	-4.774	0.002	COC(=O)\C=C\C(\C)=C/C=C/C(/C)=C/C=C/C=C(\C)/C=C/C=C(\C)/C=C/C=O
Methyl (9Z)-8'-oxo-6,8'-diapo-6-carotenoate	3	Accepted	352.2	0.882	0.772	2.446	-4.73	0.004	COC(=O)\C=C\C(\C)=C/C=C/C(/C)=C/C=C/C=C(\C)/C=C/C=C(\C)C=O
Niazidin	4	Accepted	354.09	0.838	0.292	0.807	-2.24	0.595	CC1OC(OC2=CC=C(C\N=C(\S)OC#N)C=C2)C(O)C(O)C1O
Lucyobroside	0	Rejected	699.53	0.007	0.025	6.65	-2.277	0.014	CCCCCCCCCCCCC(O)C(\O)=N\C(COC1OC(CO)C(O)C(O)C1O)C(O)\C=C\CC\C=C\CCCCCCCCCC
gamma-Glutamyl-S-methylcysteine	0	Accepted	264.08	0.042	0.017	-3.171	-1.568	0.338	CSCC(NC(=O)CCC(N)C(O)=O)C(O)=O
C.I. Pigment Red 149	3	Rejected	598.19	0.96	0.066	7.997	-10.592	0.018	CC1=CC(=CC(C)=C1)N1C(=O)C2=CC=C3C4=CC=C5C(=O)N(C6=CC(C)=CC(C)=C6)C(=O)C6=C5C4=C(C=C6)C4=C3C2=C(C=C4)C1=O
Sulforhodamine B	4	Accepted	558.15	0.532	0.517	2.686	-1.016	0.021	CCN(CC)C1=CC2=C(C=C1)C(C1=CC=C(C=C1S([O-])(=O)=O)S(O)(=O)=O)=C1C=CC(C=C1O2)=[N+](CC)CC
Pitheduloside K	1	Rejected	1060.55	0.018	0.075	0.114	-2.038	0.098	CC1(C)CCC2(C(O)CC3(C)C(=CCC4C5(C)CCC(OC6OC(COC7OCC(O)C(O)C7OC7OCC(O)C(O)C7O)C(O)C(O)C6OC6OC(CO)C(O)C(O)C6O)C(C)(C)C5CCC34C)C2C1)C(O)=O
Licorice glycoside C2	2	Rejected	726.22	0.792	0.557	1.957	-4.42	0.178	COC1=C(O)C=CC(\C=C\C(=O)OCC2(O)COC(OC3C(O)C(O)C(CO)OC3OC3=CC=C(C=C3)C3CC(=O)C4=C(O3)C=C(O)C=C4)C2O)=C1
Dehydrotomatine	2	Rejected	1031.53	0.041	0.08	-1.296	-1.168	0.167	CC1C2C(CC3C4CC=C5CC(CCC5(C)C4CCC23C)OC2OC(CO)C(OC3OC(CO)C(O)C(OC4OCC(O)C(O)C4O)C3OC3OC(CO)C(O)C(O)C3O)C(O)C2O)OC11CCC(C)CN1
Eremopetasin sulfoxide	3	Accepted	350.16	0.908	0.102	2.654	-4.213	0.035	CC1C(CCC2=CC(=O)C(CC12C)C(C)=C)OC(=O)\C=C\S(C)=O
Ergostane-3,6-dione	0	Accepted	414.35	0.024	0.02	6.044	-6.324	0.978	CC(C)C(C)CCC(C)C1CCC2C3CC(=O)C4CC(=O)CCC4(C)C3CCC12C
2-Geranyl-2',3,4,4'-tetrahydroxydihydrochalcone	2	Accepted	410.21	0.083	0.083	5.718	-3.158	0.007	CC(C)=CCC\C(C)=C\CC1=C(CCC(=O)C2=C(O)C=C(O)C=C2)C=CC(O)=C1O
Epifisetinidol-(4beta->8)-catechin-(6->4beta)-epifisetinidol	2	Rejected	834.22	0.034	0.12	3.177	-3.754	0.001	OC1CC2=C(O)C(C3C(O)C(OC4=CC(O)=CC=C34)C3=CC(O)=C(O)C=C3)=C(O)C(C3C(O)C(OC4=CC(O)=CC=C34)C3=CC(O)=C(O)C=C3)=C2OC1C1=CC(O)=C(O)C=C1
Fisetinidol-(4alpha->8)-epicatechin-(6->4beta)-epifisetinidol	2	Rejected	834.22	0.034	0.12	3.177	-3.754	0.001	OC1CC2=C(O)C(C3C(O)C(OC4=CC(O)=CC=C34)C3=CC(O)=C(O)C=C3)=C(O)C(C3C(O)C(OC4=CC(O)=CC=C34)C3=CC(O)=C(O)C=C3)=C2OC1C1=CC(O)=C(O)C=C1
Fisetinidol-(4alpha->8)-catechin-(6->4beta)-epifisetinidol	2	Rejected	834.22	0.034	0.12	3.177	-3.754	0.001	OC1CC2=C(O)C(C3C(O)C(OC4=CC(O)=CC=C34)C3=CC(O)=C(O)C=C3)=C(O)C(C3C(O)C(OC4=CC(O)=CC=C34)C3=CC(O)=C(O)C=C3)=C2OC1C1=CC(O)=C(O)C=C1
Astragalin 2''-[glucosyl-(1->2)-galactoside]	2	Rejected	772.21	0.055	0.338	-2.219	-1.459	0.431	OCC1OC(OC2C(O)C(O)C(CO)OC2OC2C(O)C(O)C(CO)OC2OC2=C(OC3=C(C(O)=CC(O)=C3)C2=O)C2=CC=C(O)C=C2)C(O)C(O)C1O
Gibberellin A110	0	Accepted	348.19	0.107	0.007	2.233	-3.683	0.152	CC12CC(O)CC(C)(C1C(C(O)=O)C13CC(CCC21)C(=C)C3)C(O)=O
4-Hydroxy-3-methoxybenzenemethanol	1	Accepted	154.06	0.235	0.198	0.376	-0.604	0.088	COC1=C(O)C=CC(CO)=C1
Vanilloloside	0	Accepted	316.12	0.117	0.221	-1.305	-1.119	0.57	COC1=C(OC2OC(CO)C(O)C(O)C2O)C=CC(CO)=C1
2,6-Dimethylbenzenethiol	1	Accepted	138.05	0.096	0.057	2.657	-2.476	0.95	CC1=CC=CC(C)=C1S
(9Z,9'Z)-Methylbixin	2	Accepted	408.23	0.702	0.878	3.533	-5.266	0.014	COC(=O)\C=C\C(\C)=C/C=C/C(/C)=C/C=C/C=C(\C)/C=C/C=C(/C)\C=C\C(=O)OC
Tsugaric acid A	0	Accepted	498.37	0.033	0.005	6.871	-4.84	0.347	CC(C)=CCCC(C1CCC2(C)C3=C(CCC12C)C1(C)CCC(OC(C)=O)C(C)(C)C1CC3)C(O)=O
5-Epidemissidine	0	Accepted	399.35	0.026	0.037	5.41	-5.595	0.617	CC1C2CCC(C)CN2C2CC3C4CCC5CC(O)CCC5(C)C4CCC3(C)C12
4-Ethylbenzaldehyde	1	Accepted	134.07	0.218	0.032	2.475	-2.825	0.979	CCC1=CC=C(C=O)C=C1
4'-Isopropylacetophenone	0	Accepted	162.1	0.355	0.034	2.906	-2.857	0.359	CC(C)C1=CC=C(C=C1)C(C)=O
Cuminaldehyde	1	Accepted	148.09	0.248	0.023	2.887	-2.949	0.966	[H]C(=O)C1=CC=C(C=C1)C(C)C
3-(2-Methylpropylidene)-3alpha,4-dihydro-1(3H)-isobenzofuranone	1	Accepted	190.1	0.902	0.686	3.337	-4.156	0.983	CC(C)\C=C1\OC(=O)C2=CC=CCC12
3-(2-Methylpropylidene)-1(3H)-isobenzofuranone	0	Accepted	188.08	0.148	0.007	3.42	-4.165	0.269	CC(C)\C=C1\OC(=O)C2=CC=CC=C12
2-Isopropylphenol	1	Accepted	136.09	0.339	0.171	2.659	-1.596	0.62	CC(C)C1=CC=CC=C1O
Guaicyl acetate	0	Accepted	166.06	0.703	0.035	1.372	-1.709	0.994	COC1=CC=CC=C1OC(C)=O
2,4,14-Eicosatrienoic acid isobutylamide	1	Accepted	361.33	0.171	0.026	6.915	-3.69	0.331	CCCCC\C=C/CCCCCCCC\C=C\C=C\C(=O)NCC(C)C
2,4,12-Octadecatrienoic acid isobutylamide	1	Accepted	333.3	0.284	0.029	5.983	-3.739	0.488	CCCCC\C=C/CCCCCC\C=C\C=C\C(=O)NCC(C)C
1,2,3-Benzenetriol	2	Accepted	126.03	0.638	0.7	0.458	0.328	0.043	[H]OC1=CC=CC(O[H])=C1O[H]
1,3-Benzenediol	1	Accepted	110.04	0.436	0.085	0.814	0.273	0.048	OC1=CC(O)=CC=C1
Isopropyl benzoate	0	Accepted	164.08	0.066	0.008	2.911	-2.792	0.311	CC(C)OC(=O)C1=CC=CC=C1
Butyl benzoate	0	Accepted	178.1	0.101	0.006	3.523	-3.475	0.232	CCCCOC(=O)C1=CC=CC=C1
Benzyl alcohol	0	Accepted	108.06	0.162	0.018	1.128	-0.668	0.886	OCC1=CC=CC=C1
Butyl 3-methylbutanoate	0	Accepted	158.13	0.241	0.006	3.201	-3.215	0.959	CCCCOC(=O)CC(C)C
Hexyl 3-methylbutanoate	0	Accepted	186.16	0.258	0.005	4.107	-4.41	0.847	CCCCCCOC(=O)CC(C)C
Pentyl 3-methylbutanoate	0	Accepted	172.15	0.291	0.006	3.702	-3.926	0.916	CCCCCOC(=O)CC(C)C
Isopropyl 3-methylbutanoate	0	Accepted	144.12	0.194	0.009	2.624	-2.402	0.99	CC(C)CC(=O)OC(C)C
Propyl 3-methylbutanoate	0	Accepted	144.12	0.153	0.007	2.722	-2.73	0.98	CCCOC(=O)CC(C)C
2,6-Di-tert-butyl-4-hydroxymethylphenol	1	Accepted	236.18	0.023	0.011	3.905	-4.424	0.893	CC(C)(C)C1=CC(CO)=CC(=C1O)C(C)(C)C
alpha-Terpinyl formate	2	Accepted	182.13	0.956	0.003	3.85	-2.894	0.998	CC1=CCC(CC1)C(C)(C)OC=O
alpha-Terpinyl propanoate	0	Accepted	210.16	0.756	0.002	4.406	-3.657	0.59	CCC(=O)OC(C)(C)C1CCC(C)=CC1
alpha-Terpinyl butanoate	0	Accepted	224.18	0.696	0.002	4.893	-4.003	0.572	CCCC(=O)OC(C)(C)C1CCC(C)=CC1
alpha-Terpinyl pentanoate	0	Accepted	238.19	0.607	0.002	5.43	-4.24	0.514	CCCCC(=O)OC(C)(C)C1CCC(C)=CC1
N-Acetylhistidine	0	Accepted	197.08	0.024	0.012	-1.535	-0.957	0.913	CC(=O)NC(CC1=CNC=N1)C(O)=O
[truncated: 56,892 more rows]
