# Supplementary material for: Prediction of Phytochemicals for Their Potential to Inhibit New Delhi Metallo β-Lactamase (NDM-1)
Source: Pharmaceuticals (Basel). 2023 Oct 3;16(10):1404. doi: 10.3390/ph16101404 (PMC10610165; doi:10.3390/ph16101404)
Supplement: Supplementary file 1 [file pharmaceuticals-16-01404-s001.zip › Table S3.xlsx]

## Sheet: 135 compounds
Table S3. List of phytochemicals showing accepatable values of pharmacokinetics and Lipinski's Rule of Five
Sr No	smiles	LogS	LogP	BBB	Ames	MW	nHA	nHD	Toxicophores	Synth	Lipinski	Energy Values	Compounds
1	CC(C)c1c(O)c(O)c2c(c1O)C=CC1C(C)(C)CCC[C@]21C	-4.263	5.089	0.069	0.062	316.2	3	3	3	4.178	Accepted	-11.8	(+)-Royleanone
2	O=C(C=Cc1ccc(O)c(O)c1)c1ccc(O)cc1O	-2.993	2.639	0.029	0.626	272.07	5	4	3	2.225	Accepted	-9.1	Butein
3	O=C(O)C=Cc1cccc(O)c1O	-1.279	1.521	0.171	0.199	180.04	4	3	3	2.199	Accepted	-7.6	(E)-3-(2,3-Dihydroxyphenyl)-2-propenoic acid
4	COc1c2ccoc2c(OCC(O)C(C)(C)O)c2oc(=O)ccc12	-3.177	1.706	0.079	0.158	334.11	7	2	3	3.365	Accepted	-8.7	(R)-Byakangelicin
5	C=C/C=C\C#CC#CC#C/C=C\C	-4.597	4.572	0.001	0.459	166.08	0	0	5	4.382	Accepted	-6.4	(Z,Z)-1,3,11-Tridecatriene-5,7,9-triyne
6	COC1c2c(O)c(C(C)C)c(O)c(O)c2C23CCCC(C)(C)C2C1OC3=O	-4.259	3.971	0.13	0.058	376.19	6	3	3	5.325	Accepted	-11.6	14-Hydroxy-7-methylrosmanol
7	O=C(C=Cc1ccc(O)c(O)c1)O[C@@H]1O[C@H](CO)[C@@H](O)[C@H](O)[C@H]1O	-0.743	-0.322	0.41	0.494	342.1	9	6	3	3.703	Accepted	-8.9	1-O-Caffeoyl-beta-D-glucose
8	COc1cc2oc(=O)c3c4ccc(O)cc4oc3c2c(OC)c1CC=C(C)C	-5.342	5.571	0.005	0.219	380.13	6	1	3	2.9	Accepted	-9.9	1-O-Methylglycyrol
9	S=C=NCCc1ccccc1	-3.162	3.27	0.362	0.281	163.05	1	0	3	2.289	Accepted	-5.8	2-Phenethyl isothiocyanate
10	C=CC(C)(C)c1cc2cc(OC)c(O)cc2oc1=O	-4.398	3.121	0.063	0.011	260.1	4	1	3	2.732	Accepted	-9.1	3-(1,1-Dimethylallyl)scopoletin)
11	COc1c(O)cc2c(=O)oc3c(OC)c(O)cc4c(=O)oc1c2c34	-4.849	1.544	0.017	0.236	330.04	8	2	3	2.927	Accepted	-10.5	3,3'-Di-O-methylellagic acid
12	S=C=NCc1ccccc1	-2.904	3.163	0.245	0.256	149.03	1	0	3	2.322	Accepted	-5.4	3-Benzylisothiocyanate
13	O=C(C=Cc1ccc(O)c(O)c1)O[C@@H]1C[C@@](O)(C(=O)O)C[C@@H](O)[C@@H]1O	-1.168	0.338	0.231	0.034	354.1	9	6	3	3.871	Accepted	-9.3	3-Caffeoylquinic acid
14	C=C/C=C/C#CC#CC#CC#CC	-4.955	4.529	0.001	0.437	164.06	0	0	5	4.314	Accepted	-6.2	3E-Trideca-1,3-diene-5,7,9,11-tetrayne
15	O=C(O)C(=O)Cc1cccc(O)c1	-0.456	0.687	0.205	0.012	180.04	4	2	3	1.985	Accepted	-7	3-Hydroxyphenylpyruvic acid
16	C=C/C=C\C#CC#CC#C/C=C/C	-4.589	4.415	0.001	0.467	166.08	0	0	5	4.382	Accepted	-6.9	3Z,11E-Trideca-1,3,11-triene-5,7,9-triyne
17	Nc1c(O)cccc1C(=O)CC(=O)C(=O)O	-2.29	-0.052	0.112	0.028	223.05	6	4	6	2.42	Accepted	-7.3	4-(2-Amino-3-Hydroxyphenyl)-2,4-Dioxobutanoate)
18	Cc1c([N+](=O)[O-])cc(NC2OC(CO)C(O)C(O)C2O)cc1[N+](=O)[O-]	-1.587	0.563	0.207	0.365	359.1	12	5	3	3.909	Accepted	-8.1	4-amino-2,6-dinitrotoluene glucoside
19	O=C(O)C(=O)Cc1ccc(O)cc1	-0.895	0.599	0.192	0.017	180.04	4	2	3	1.882	Accepted	-8.7	4-hydroxyphenylpyruvate
20	Cc1cc(=O)oc2cc(O)c(O)cc12	-2.54	1.402	0.03	0.088	192.04	4	2	3	2.202	Accepted	-9	4-Methylaesculetin
21	C[S+]([O-])CCCCC(=NOS(=O)(=O)O)SC1OC(CO)C(O)C(O)C1O	-0.095	-1.945	0.119	0.024	437.05	11	5	3	5.068	Accepted	-7	4-methylsulfinylbutyl glucosinolate
22	C=CC(C)(CC/C=C(\C)CCC=C(C)C)c1ccc(O)c(O)c1	-4.336	5.897	0.024	0.01	314.22	2	2	3	3.501	Accepted	-8.8	4-Nerolidylcatechol
23	O=C(C=Cc1ccc(O)c(O)c1)O[C@@H]1C[C@](O)(C(=O)O)C[C@@H](O)[C@H]1O	-0.865	0.331	0.264	0.033	354.1	9	6	3	3.871	Accepted	-9.3	5-Caffeoylquinic acid
24	O=C(O)C1CSC(Cc2c[nH]c3ccc(O)cc23)N1	-2.196	-0.75	0.262	0.018	278.07	5	4	3	3.592	Accepted	-8.4	5-hydroxyindole thiazolidine carboxylate
25	O=C(O)Cc1c[nH]c2ccc(O)cc12	-1.812	1.16	0.093	0.075	191.06	4	3	3	2.054	Accepted	-7.6	5-Hydroxyindole-3-acetic acid
26	O=C(O)CNC(=O)Cc1c[nH]c2ccc(O)cc12	-1.935	-0.113	0.067	0.033	248.08	6	4	3	2.124	Accepted	-7.7	5-Hydroxyindoleacetylglycine)
27	NC(Cc1c[nH]c2ccc(O)cc12)C(=O)O	-2.255	-1.906	0.345	0.013	220.08	5	5	3	2.587	Accepted	-8	5-Hydroxy-L-tryptophan
28	NC(CC(=O)c1cc(O)ccc1NC=O)C(=O)O	-2.396	-2.427	0.292	0.029	252.07	7	5	5	2.993	Accepted	7.3	5-Hydroxy-N-Formylkynurenine
29	CC(=O)OC1=CC2C(C)(C)CCC[C@]2(C)c2c(O)c(O)c(C(C)C)c(O)c21	-4.21	4.554	0.096	0.026	374.21	5	3	3	4.231	Accepted	-11.6	7-O-Acetylhorminone
30	COc1cc(C2CC(=O)c3c(O)c(O)c(OC)c(O)c3O2)ccc1O	-3.496	1.871	0.004	0.028	348.08	8	4	3	3.246	Accepted	-10.1	8-Demethylthymonin
31	C=CC(=O)NC(C)(CC)S(=O)(=O)O	-0.37	-1.304	0.458	0.033	207.06	5	2	4	3.802	Accepted	-9.8	Acrylic acid-2-acrylamido-2-methyl propane sulfonic acid copolymer
32	COc1cc(C)c(C(=O)OC2CC3(C)C2=C(C=O)CC2CC(C)(C)CC23)c(O)c1	-5.4	5.183	0.044	0.035	398.21	5	1	3	4.419	Accepted	-10.6	Armillaribin
33	O=C(C=Cc1ccc(O)c(O)c1)Nc1ccc(O)cc1C(=O)O	-3.346	2.202	0.02	0.059	315.07	7	5	7	2.179	Accepted	-9.3	Avenanthramide 2c
34	COc1cc(C=CC(=O)Nc2ccc(O)cc2C(=O)O)ccc1O	-3.422	2.484	0.044	0.022	329.09	7	4	6	2.104	Accepted	-9.2	Avenanthramide 2f
35	O=C(C=Cc1ccc(O)cc1)Nc1ccc(O)cc1C(=O)O	-3.363	2.597	0.055	0.014	299.08	6	4	6	2.023	Accepted	-9.3	Avenanthramide 2p
36	O=C(C=Cc1ccc(O)c(O)c1)Nc1cc(O)ccc1C(=O)O	-3.361	2.252	0.019	0.054	315.07	7	5	6	2.213	Accepted	-9.6	Avenanthramide K
37	CCOC(=O)NCc1ccc(OC2OC(C)C(OC(C)=O)C(OC(C)=O)C2OC(C)=O)cc1	-3.911	2.071	0.502	0.337	467.18	11	1	3	3.687	Accepted	-7.8	Bis-N-butyl phthalate
38	CC(C)=CCC/C(C)=C/CC/C(C)=C/CC=C(C)C=Cc1c(O)c(O)cc(O)c1O	-3.385	6.746	0.004	0.008	412.26	4	4	4	3.394	Accepted	-9.9	Boviquinone 4
39	CCCCOC(=O)C1(O)CC(O)C(O)C(OC(=O)C=Cc2ccc(O)c(O)c2)C1	-1.781	1.585	0.69	0.041	410.16	9	5	3	3.906	Accepted	-8.4	Butyl3-O-Caffeoylquinate
40	O=C(O)C=Cc1ccc(O)c(O)c1	-1.118	1.43	0.119	0.183	180.04	4	3	3	2.035	Accepted	-7.4	Caffeic acid
41	O=C(O)CC(=NC(=O)CCc1ccc(O)c(O)c1)C(=O)O	-1.006	-0.1	0.034	0.039	295.07	8	4	3	2.771	Accepted	-7.6	Caffeoyl aspartic acid
42	O=C(C=Cc1ccc(O)c(O)c1)O[C@@H]1O[C@H](CO)[C@@H](O)[C@H](O)[C@H]1O	-0.743	-0.322	0.41	0.494	342.1	9	6	3	3.703	Accepted	-9	Caffeoyl glucose
43	O=C(C=Cc1ccc(O)c(O)c1)OC(C(=O)C(=O)O)C(O)O	-1.093	-0.368	0.462	0.01	312.05	9	5	6	3.248	Accepted	-7.4	Caffeoyl tartaric acid
44	O=C(C=Cc1ccc(O)c(O)c1)OC1CC(C(=O)O)CC(=O)C1O	-1.221	0.661	0.35	0.013	336.08	8	4	3	3.714	Accepted	-9.1	caffeoylshikimate
45	CC1=CC(C)C(=O)C(=O)CCC(=O)C23C(=O)N[C@@H]([C@H](C)c4c[nH]c5ccccc45)[C@@H]2[C@H](C)[C@@]2(C)O[C@H]2[C@@H]3/C=C/C1	-4.313	4.294	0.227	0.151	542.28	7	2	3	6.194	Accepted	-16.2	Chaetoglobosin N
46	O=C(C=Cc1ccc(O)c(O)c1)O[C@@H]1C[C@](O)(C(=O)O)C[C@@H](O)[C@H]1O	-0.865	0.331	0.264	0.033	354.1	9	6	3	3.871	Accepted	-9.3	Cis-5-Caffeoylquinic acid
47	O=C(C=Cc1ccc(O)c(O)c1)OC(C(=O)C(=O)O)C(O)O	-1.093	-0.368	0.462	0.01	312.05	9	5	6	3.248	Accepted	-7.7	cis-Caftaric acid
48	O=C(C=Cc1ccc(O)c(O)c1)O[C@@H]1C[C@](O)(C(=O)O)C[C@@H](O)[C@H]1O	-0.865	0.331	0.264	0.033	354.1	9	6	3	3.871	Accepted	-8	cis-Chlorogenic acid
49	C=CC(O)/C=C/C#CC(O)/C=C/CCCCCCC	-4.053	3.783	0.299	0.141	262.19	2	2	4	4.255	Accepted	-6.6	Crithmumdiol
50	OC[C@H]1O[C@@H](Oc2cc3cc(C(O)O)[nH]c3cc2O)[C@H](O)[C@@H](O)[C@@H]1O	-1.585	-1.456	0.338	0.384	357.11	10	8	4	4.141	Accepted	-9.5	cyclo-dopa 5-O-glucoside
51	CC[C@@H](C)N=C=S	-2.09	3.193	0.27	0.084	115.05	1	0	3	4.048	Accepted	-4.3	D-2-Butylisothiocyanate
52	O=C(O)c1cc2cc(O)c(O)cc2[nH]1	-2.487	1.292	0.153	0.054	193.04	5	4	4	2.338	Accepted	-7.8	D-Dopachrome
53	COc1c(O)cc(C)c(O)c1O	-0.66	0.577	0.067	0.069	170.06	4	3	3	2.357	Accepted	-6.6	Dihydrofumigatin
54	O=C(O)C1OC(Oc2cc3[nH]ccc3cc2O)C(O)C(O)C1O	-2.423	-0.996	0.629	0.021	325.08	9	6	3	3.856	Accepted	-9.1	Dihyroxy-1h-IndoleGlucuronideI
55	O=C(O)C(=O)C(CC(O)O)C(=O)O	-0.132	-1.811	0.385	0.021	192.03	7	4	3	3.356	Accepted	-5.9	D-threo-isocitrate
56	Oc1ccc([C@H]2Oc3c(O)c(O)c(O)c(O)c3C[C@H]2O)cc1O	-2.032	0.355	0.013	0.218	322.07	8	7	3	3.684	Accepted	-11.5	Elephantorrhizol
57	CC(=O)O[C@H]1CO[C@@H](Oc2cc3c(=O)oc4c(O)c(O)cc5c(=O)oc(c2O)c3c45)[C@H](O)[C@H]1O	-4.847	0.173	0.026	0.22	476.06	13	5	3	4.328	Accepted	-11.5	Ellagic acid acetyl-arabinoside
58	CC(=O)O[C@@H]1CO[C@@H](Oc2cc3c(=O)oc4c(O)c(O)cc5c(=O)oc(c2O)c3c45)[C@H](O)[C@H]1O	-4.499	0.096	0.025	0.234	476.06	13	5	3	4.328	Accepted	-8.1	Ellagic acid acetyl-xyloside
59	O=Cc1cc(O)c(O)c(O)c1	-1.132	0.224	0.032	0.216	154.03	4	3	3	2.386	Accepted	-6.3	Gallaldehyde
60	CC(C)=CCc1c(O)cc2oc3cc(O)c(O)c(CCC(C)(C)O)c3c(=O)c2c1O	-3.162	4.675	0.002	0.431	414.17	7	5	3	3.24	Accepted	-10.4	Garcinone C
61	COc1c(CC=C(C)C)c(O)cc2oc(=O)c3c4ccc(O)cc4oc3c12	-3.81	5.373	0.004	0.22	366.11	6	2	3	2.973	Accepted	-10.8	Glycyrol
62	CC(=O)CCC(=O)C(C)c1cc(O)c(C)cc1O	-1.099	0.853	0.065	0.051	250.12	4	2	3	3.063	Accepted	-8	Helinorbisabone
63	CC(C)c1c(O)c(O)c2c(c1O)C(=O)CC1C(C)(C)CCC[C@]21C	-4.18	4.695	0.089	0.054	332.2	4	3	3	3.928	Accepted	-12.3	Horminone
64	O=C(O)C=Cc1ccc(O)c(O)c1O	-1.287	0.985	0.063	0.299	196.04	5	4	3	2.429	Accepted	-7.5	Hydroxycaffeic acid
65	Nc1c(O)cccc1C(=O)CC(N)C(=O)O	-2.13	-2.246	0.405	0.035	224.08	6	6	4	2.814	Accepted	-7.2	L-3-Hydroxykynurenine
66	COC(=O)C(C)=C1C(=O)C2C(C=O)CC(=O)C2C(C)CC1(C)OC(=O)Cc1ccc(O)cc1	-3.346	1.906	0.025	0.011	456.18	8	1	3	4.666	Accepted	-10.4	Lactupicrin methyl ester
67	O=C(O)CC(OC(=O)C=Cc1ccc(O)c(O)c1)C(=O)O	-1.214	0.878	0.142	0.008	296.05	8	4	3	2.853	Accepted	-6.7	L-Malic acid caffeate
68	O=C(O)c1cc(O)c(O)c2oc(=O)c3cc(O)c(O)c(O)c3c12	-3.048	1.063	0.012	0.08	320.02	9	6	4	2.916	Accepted	-11.5	Luteic acid
69	COCC1O[C@@H](O[C@@H]2C(COC)OC(OC)C(OC)C2OC)C(OC)C(OC)C1OC	-0.83	0.061	0.259	0.113	454.24	11	0	3	4.52	Accepted	-6.3	Methyl cellulose
70	COc1cc(C=CC(=O)CC(=O)C=Cc2ccc(O)c(O)c2)ccc1O	-3.333	2.57	0.061	0.289	354.11	6	3	4	2.497	Accepted	-9.3	Monodemethylcurcumin
71	COc1cc(C=CC(=O)NCCc2ccc(O)cc2)ccc1O	-3.054	2.538	0.111	0.228	313.13	5	3	3	1.987	Accepted	-8.7	Moupinamide
72	CCOC(=S)NCc1ccc(O[C@@H]2O[C@@H](C)[C@H](OC(C)=O)[C@@H](OC(C)=O)[C@H]2OC(C)=O)cc1	-4.175	2.605	0.081	0.286	483.16	10	1	6	3.87	Accepted	-7	N-[(4-hydroxyphenyl)methyl]ethoxycarbothioamide 4'-(tri-acetylrhamnoside)
73	O=C(C=Cc1ccc(O)c(O)c1)O[C@@H]1C[C@@](O)(C(=O)O)C[C@@H](O)[C@@H]1O	-1.168	0.338	0.231	0.034	354.1	9	6	3	3.871	Accepted	-9.3	Neochlorogenic acid
74	NCCCCNC(=O)C=Cc1ccc(O)c(O)c1	-1.321	0.203	0.038	0.435	250.13	5	5	4	2.166	Accepted	-7	Paucine
75	O=Cc1ccc(O)c(O)c1	-1.512	0.76	0.084	0.179	138.03	3	2	3	2.05	Accepted	-6.2	Protocatechualdehyde
76	COc1c(O)ccc2[nH]cc(N=C=S)c12	-2.904	3.378	0.073	0.221	220.03	4	2	6	3.119	Accepted	-7.6	Rapalexin B
77	O=C(C=Cc1ccc(O)c(O)c1)OC(Cc1ccc(O)c(O)c1)C(=O)O	-2.432	1.775	0.049	0.035	360.08	8	5	3	2.903	Accepted	-8.9	Rosmarinic acid
78	CC(C)=CCC/C(C)=C/CC=C(C)CCc1c(C)c(C=O)c(O)c(O)c1O	-3.604	6.973	0.01	0.01	372.23	4	3	3	3.315	Accepted	-10	Scutigeral
79	NCCc1c[nH]c2ccc(O)cc12	-1.208	0.683	0.109	0.283	176.09	3	4	3	2.13	Accepted	-7.2	Serotonin
80	CCCCCCCCC=CCCCCCCCCCC(=O)O[C@@H](COC(=O)CCCCCCCCCCCCC)COC(=O)CCCCCCCCCCCCCC	-8.162	17.378	0	0.002	818.74	6	0	3	3.228	Accepted	-7	TG(15:0/20:1(11Z)/14:0)[iso6]
81	N=C(Cc1cc(O)c(O)cc1O)C(=O)O	-1.028	-0.419	0.099	0.466	211.05	6	5	4	2.868	Accepted	-7.6	Topaquinone
82	NC(Cc1c[nH]c2ccccc12)C(=O)NC(Cc1ccc(O)cc1)C(=O)O	-2.663	0.481	0.069	0.01	367.15	7	6	3	2.761	Accepted	-8.9	Trp-Tyr
83	NC(CCC(=O)NC(=O)C(N)Cc1ccc(O)cc1)C(=O)O	-1.995	-3.252	0.218	0.015	309.13	8	7	3	2.89	Accepted	-8.4	Tyr-Gglu
84	S=C=NCc1ccccc1	-2.904	3.163	0.245	0.256	149.03	1	0	3	2.322	Accepted	-5.4	Urogran
85	O=Cc1cc(O)ccc1O	-1.183	1.179	0.087	0.261	138.03	3	2	3	2.202	Accepted	-9	2,5-dihydroxybenzaldehyde
86	Cc1c(=O)c(=O)c2c3c[nH]c4c(C)c(=O)c(=O)c(c5c[nH]c1c52)c43	-6.095	1.197	0.085	0.455	318.06	6	2	3	3.489	Accepted	-12.3	3,8-dimethyl-2,7-dihydrobenzo[1,2,3-cd:4,5,6-c'd']diindole-4,5,9,10-tetraone
87	Nc1c(O)cccc1C(=O)CC(=O)C(=O)O	-2.29	-0.052	0.112	0.028	223.05	6	4	6	2.42	Accepted	-7.3	4-(2-amino-3-hydroxyphenyl)-2,4-dioxobutanoic acid
88	NC(CC(=O)c1cc(O)ccc1NC=O)C(=O)O	-2.396	-2.427	0.292	0.029	252.07	7	5	5	2.993	Accepted	-7.7	2-amino-4-(2-formamido-5-hydroxyphenyl)-4-oxobutanoic acid
89	O=C(O)CNC(=O)Cc1c[nH]c2ccc(O)cc12	-1.935	-0.113	0.067	0.033	248.08	6	4	3	2.124	Accepted	-7.8	(2-(5-hydroxy-1H-indol-3-yl)acetyl)glycine
90	CC(C=Cc1cc(O)c2ccccc2c1O)=CCCC(C)CCCC(C)CCCC(C)C	-5.737	9.145	0.139	0.148	436.33	2	2	3	3.543	Accepted	-10	2-(3,7,11,15-tetramethylhexadeca-1,3-dien-1-yl)naphthalene-1,4-diol
91	CC(C=CC(=O)O)=CCc1c(C)c(O)c2ccccc2c1O	-3.479	4.196	0.04	0.117	298.12	4	3	4	2.652	Accepted	-9.9	6-(1,4-dihydroxy-3-methylnaphthalen-2-yl)-4-methylhexa-2,4-dienoic acid
92	CC(=CCc1c(C)c(O)c2ccccc2c1O)C(=O)O	-3.165	3.497	0.045	0.031	272.1	4	3	3	2.5	Accepted	-9.5	4-(1,4-dihydroxy-3-methylnaphthalen-2-yl)-2-methylbut-2-enoic acid
93	O=C(O)C(=O)Cc1ccc(O)cc1	-0.895	0.599	0.192	0.017	180.04	4	2	3	1.882	Accepted	-6.9	3-(4-hydroxyphenyl)-2-oxopropanoic acid
94	Oc1ccc([C@H]2Oc3c(O)c(O)c(O)c(O)c3C[C@H]2O)cc1O	-2.032	0.355	0.013	0.218	322.07	8	7	3	3.684	Accepted	-11	(2R,3R)-2-(3,4-dihydroxyphenyl)chromane-3,5,6,7,8-pentaol
95	COc1cc2oc3cc(O)c(=O)c(=CCC(C)C)c3c(O)c2c(=O)c1CC=C(C)C	-3.673	5.6	0.01	0.467	410.17	6	2	3	3.406	Accepted	-10.3	1,6,7-trihydroxy-3-methoxy-2,8-bis(3-methylbut-2-en-1-yl)-9H-xanthen-9-one
96	CC(C=Cc1c(C)c(O)c2ccccc2c1O)=CCC[C@H](C)CCC[C@H](C)CCCC(C)C	-5.703	9.607	0.348	0.398	450.35	2	2	3	3.646	Accepted	-10.6	2-methyl-3-((7R,11R)-3,7,11,15-tetramethylhexadeca-1,3-dien-1-yl)naphthalene-1,4-diol
97	CC(=O)C(N)C(O)NC(Cc1c[nH]c2ccccc12)C(=O)O	-2.036	-1.316	0.48	0.006	305.14	7	6	4	3.421	Accepted	-6.7	(2-amino-1-hydroxy-3-oxobutyl)tryptophan
98	O=C(O)C1O[C@H](Oc2cc3[nH]ccc3cc2O)[C@@H](O)[C@H](O)[C@H]1O	-1.658	0.042	0.281	0.022	325.08	9	6	3	3.856	Accepted	-9.1	(3R,4R,5S,6R)-3,4,5-trihydroxy-6-((5-hydroxy-1H-indol-6-yl)oxy)tetrahydro-2H-pyran-2-carboxylic acid
99	N=C(N)NCCCC(N)C(=O)NC(C=O)C(O)O	-0.833	-3.291	0.134	0.15	261.14	9	9	3	3.707	Accepted	-6.3	2-amino-N-(1,1-dihydroxy-3-oxopropan-2-yl)-5-guanidinopentanamide
100	CC(=O)C(NC(=O)C(N)CCCN=C(N)N)C(O)O	-0.593	-2.518	0.426	0.011	275.16	9	9	3	3.425	Accepted	-6.2	2-amino-5-((diaminomethylene)amino)-N-(1,1-dihydroxy-3-oxobutan-2-yl)pentanamide
101	N=C(N)NCCCC(N)C(=O)NC(=O)CCC(N)C(=O)O	-1.31	-4.521	0.319	0.057	302.17	10	10	3	3.247	Accepted	-6.8	N5-arginylglutamine
102	CC(=O)C(NC(=O)C(N)CS)C(O)O	-0.35	-1.597	0.204	0.25	222.07	6	5	3	3.525	Accepted	-6.8	2-amino-N-(1,1-dihydroxy-3-oxobutan-2-yl)-3-mercaptopropanamide
103	NC(C=O)C(O)NC(C=O)C(O)O	-0.678	-2.95	0.016	0.294	192.07	7	6	3	4.862	Accepted	-5.6	2-amino-3-((1,1-dihydroxy-3-oxopropan-2-yl)amino)-3-hydroxypropanal
104	NC(C=O)C(O)NC(Cc1ccc(O)cc1)C(=O)O	-2.154	-2.518	0.065	0.011	268.11	7	6	3	3.485	Accepted	-7	(2-amino-1-hydroxy-3-oxopropyl)tyrosine
105	NC(C=O)C(=O)NC(=O)CCC(N)C(O)O	-0.543	-3.023	0.084	0.117	233.1	8	7	4	3.971	Accepted	-6.5	4-amino-N-(2-amino-3-oxopropanoyl)-5,5-dihydroxypentanamide
106	CC(=O)C(N)C(O)NC(CCCN=C(N)N)C(=O)O	-1.203	-3.415	0.464	0.007	275.16	9	9	3	3.774	Accepted	-6.1	2-((2-amino-1-hydroxy-3-oxobutyl)amino)-5-((diaminomethylene)amino)pentanoic acid
107	CC(=O)C(N)C(O)NC(C=O)C(O)O	-0.738	-2.737	0.084	0.066	206.09	7	6	4	4.578	Accepted	-5.7	2-((2-amino-1-hydroxy-3-oxobutyl)amino)-3,3-dihydroxypropanal
108	CC(=O)C(N)C(O)NC(Cc1c[nH]c2ccccc12)C(=O)O	-2.036	-1.316	0.48	0.006	305.14	7	6	4	3.421	Accepted	-7.4	(2-amino-1-hydroxy-3-oxobutyl)tryptophan
109	CC(=O)C(N)C(O)NC(Cc1ccc(O)cc1)C(=O)O	-2.135	-2.184	0.229	0.008	282.12	7	6	3	3.367	Accepted	-7.3	(2-amino-1-hydroxy-3-oxobutyl)tyrosine
110	CC(=O)C(N)C(=O)NC(=O)CCC(N)C(O)O	-0.288	-2.655	0.329	0.022	247.12	8	7	4	3.833	Accepted	-9	4-amino-N-(2-amino-3-oxobutanoyl)-5,5-dihydroxypentanamide
111	NC(Cc1c[nH]c2ccccc12)C(=O)N1C[C@H](O)CC1C(=O)O	-1.499	-0.33	0.422	0.004	317.14	7	5	3	3.175	Accepted	-8	(4R)-4-hydroxy-1-tryptophylpyrrolidine-2-carboxylic acid
112	NC(Cc1c[nH]c2ccccc12)C(=O)NC(C=O)C(O)O	-1.387	-1.203	0.119	0.425	291.12	7	6	4	3.291	Accepted	-7.8	2-amino-N-(1,1-dihydroxy-3-oxopropan-2-yl)-3-(1H-indol-3-yl)propanamide
113	NC(Cc1c[nH]c2ccccc12)C(=O)NC(Cc1ccc(O)cc1)C(=O)O	-2.663	0.481	0.069	0.01	367.15	7	6	3	2.761	Accepted	-8.2	tryptophyltyrosine
114	NC(CCC(=O)NC(=O)C(N)Cc1c[nH]c2ccccc12)C(=O)O	-1.624	-2.494	0.494	0.015	332.15	8	7	4	2.985	Accepted	-8.7	N5-tryptophylglutamine
115	NC(Cc1ccc(O)cc1)C(=O)NC(C=O)C(O)O	-1.2	-1.916	0.048	0.242	268.11	7	6	3	3.246	Accepted	-7.5	2-amino-N-(1,1-dihydroxy-3-oxopropan-2-yl)-3-(4-hydroxyphenyl)propanamide
116	CC(=O)C(NC(=O)C(N)Cc1ccc(O)cc1)C(O)O	-1.139	-1.457	0.286	0.015	282.12	7	6	3	3.029	Accepted	-6.3	2-amino-N-(1,1-dihydroxy-3-oxobutan-2-yl)-3-(4-hydroxyphenyl)propanamide
117	NC(Cc1ccc(O)cc1)C(=O)NC(Cc1c[nH]c2ccccc12)C(=O)O	-2.709	0.48	0.071	0.01	367.15	7	6	3	2.76	Accepted	-8.9	tyrosyltryptophan
118	NC(CCC(=O)NC(=O)C(N)Cc1ccc(O)cc1)C(=O)O	-1.995	-3.252	0.218	0.015	309.13	8	7	3	2.89	Accepted	-8.3	N5-tyrosylglutamine
119	O=C(C=Cc1ccc(O)c(O)c1)OC1C(=O)CC(C(=O)O)CC1O	-1.385	0.634	0.408	0.013	336.08	8	4	3	3.726	Accepted	-9.1	4-((3-(3,4-dihydroxyphenyl)acryloyl)oxy)-3-hydroxy-5-oxocyclohexane-1-carboxylic acid
120	O=C(C=Cc1ccc(O)c(O)c1)OC1CC(C(=O)O)CC(=O)C1O	-1.221	0.661	0.35	0.013	336.08	8	4	3	3.714	Accepted	-9.1	3-((3-(3,4-dihydroxyphenyl)acryloyl)oxy)-4-hydroxy-5-oxocyclohexane-1-carboxylic acid
121	CC(C=Cc1c(C)c(O)c2ccccc2c1O)=CCCC(C)CCCC(C)CCCC(C)C	-5.314	9.42	0.211	0.104	450.35	2	2	3	3.646	Accepted	-10.6	2-methyl-3-(3,7,11,15-tetramethylhexadeca-1,3-dien-1-yl)naphthalene-1,4-diol
122	O=C(O)C(=O)C(CC(O)O)C(=O)O	-0.132	-1.811	0.385	0.021	192.03	7	4	3	3.356	Accepted	-5.9	2-(2,2-dihydroxyethyl)-3-oxosuccinic acid
123	C=C(C(CC=C(C)C)OC(=O)C(C)=CC)C1C(OC(C)=O)C(=O)C2(C)OC2C1OC(C)=O	-3.324	2.578	0.297	0.018	448.21	8	0	3	4.913	Accepted	-7.1	6-methyl-3-(6-methyl-3-((2-methylbut-2-enoyl)oxy)hepta-1,5-dien-2-yl)-5-oxo-7-oxabicyclo[4.1.0]heptane-2,4-diyl diacetate
124	O=C(O)C(=O)C(Oc1cc(O)c2c(=O)c(-c3ccc(O)cc3)coc2c1)C(O)O	-3.919	0.773	0.026	0.008	402.06	10	5	4	3.332	Accepted	-9.4	4,4-dihydroxy-3-((5-hydroxy-3-(4-hydroxyphenyl)-4-oxo-4H-chromen-7-yl)oxy)-2-oxobutanoic acid
125	O=Cc1cc(O)ccc1O	-1.183	1.179	0.087	0.261	138.03	3	2	3	2.202	Accepted	-5.9	2,5-dihydroxybenzaldehyde
126	CC(C=CC(=O)O)=CCc1c(C)c(O)c2ccccc2c1O	-3.479	4.196	0.04	0.117	298.12	4	3	4	2.652	Accepted	-9.9	6-(1,4-dihydroxy-3-methylnaphthalen-2-yl)-4-methylhexa-2,4-dienoic acid
127	CC(=CCc1c(C)c(O)c2ccccc2c1O)C(=O)O	-3.165	3.497	0.045	0.031	272.1	4	3	3	2.5	Accepted	-9.5	4-(1,4-dihydroxy-3-methylnaphthalen-2-yl)-2-methylbut-2-enoic acid
128	N=C(N)NCCCC(N)C(=O)NC(C=O)C(O)O	-0.833	-3.291	0.134	0.15	261.14	9	9	3	3.707	Accepted	-6.3	2-amino-N-(1,1-dihydroxy-3-oxopropan-2-yl)-5-guanidinopentanamide
129	CC(=O)C(NC(=O)C(N)CS)C(O)O	-0.35	-1.597	0.204	0.25	222.07	6	5	3	3.525	Accepted	-5.5	2-amino-N-(1,1-dihydroxy-3-oxobutan-2-yl)-3-mercaptopropanamide
130	CC(=O)C(N)C(O)NC(Cc1ccc(O)cc1)C(=O)O	-2.135	-2.184	0.229	0.008	282.12	7	6	3	3.367	Accepted	-7.1	(2-amino-1-hydroxy-3-oxobutyl)tyrosine
131	NC(Cc1ccc(O)cc1)C(=O)NC(C=O)C(O)O	-1.2	-1.916	0.048	0.242	268.11	7	6	3	3.246	Accepted	-6.6	2-amino-N-(1,1-dihydroxy-3-oxopropan-2-yl)-3-(4-hydroxyphenyl)propanamide
132	CC(=O)C(NC(=O)C(N)Cc1ccc(O)cc1)C(O)O	-1.139	-1.457	0.286	0.015	282.12	7	6	3	3.029	Accepted	-7.4	2-amino-N-(1,1-dihydroxy-3-oxobutan-2-yl)-3-(4-hydroxyphenyl)propanamide
LogS	Aqueous solubility value. After intake of drug it disintegration followed by dissolution of the active drug. Low solibilitymeans good and complete oral absorption
MW Molecular Weight = Contain hydrogen atoms. Optimal:100~600, based on Lipinski Rule.
BBB	Blood Brain Barrier= Drugs need to cross the BBB for reaching to its target molecule. Its empirical decision in probability value.0-0.3: excellent ; 0.3-0.7: medium ; 0.7-1.0: poor
Log P	Octanol/water distribution coefficient tells us about permeability and hydrophobic binding of target molecule with drug. Compounds in the range from 0 to 3 log mol/l will be considered proper.
Ames	Test for checking the mutagenicity property of compound.
Carcinogenic	Test to check the cancer causing property of compound. Its empirical decision in probability value. 0 to 0.5 in acceptable range
Toxicophore	This test give us information about toxicity class. Class start from 0 to 10. Compounds belongs to class 0 to 2 are highly toxic
Synthetic	Synthetic accessibility scale of compound: from 1 very easy to 10 very difficult
Ki(uM)	Ki is an inhibition constant that tells us affinity of ligand toward receptor. Smaller thhe Ki better it is and it was calculated by Autodock4.2 in
